# Supplementary material for: All-optical closed-loop voltage clamp for precise control of muscles and neurons in live animals
Source: Nat Commun. 2023 Apr 6;14:1939. doi: 10.1038/s41467-023-37622-6 (PMC10079764; doi:10.1038/s41467-023-37622-6)
Supplement: Supplementary file 9 — Source Data [file 41467_2023_37622_MOESM9_ESM.xlsx]

## Sheet: 1 F
Parameters for step (1): Holding dF/F0: 0.0 % Tolerance range: -1.0 - 1.0 % Exposure time: 10 ms Binning: 4x4
Parameters for step (2): Holding dF/F0: -5.0 % Tolerance range: -6.0 - -4.0 %
Parameters for step (3): Holding dF/F0: 5.0 % Tolerance range: 4.0 - 6.0 %
Parameters for step (4): Holding dF/F0: 0.0 % Tolerance range: -1.0 - 1.0 %
Bleaching correction function: exp. offset = 658.28 * exp(-0.0009 * x) + 9572.89 R^2: 0.8183 Video duration: 28.34 s Framerate: 99.84
# Measurement	Time	F	F_bleach_correct	dF/F0	dF/F0_bleach_correct	Wavelength	Info	Step
0	0.01	10863.5	0	?	0	525	Calibration	-
1	0.02	10974.1	0	?	0	525	Calibration	-
2	0.03	10913.9	0	?	0	525	Calibration	-
3	0.0401	10687.2	0	?	0	525	Calibration	-
4	0.0501	10499.9	0	?	0	525	Calibration	-
5	0.0601	10302.9	0	?	0	525	Calibration	-
6	0.0701	10304.1	0	?	0	525	Calibration	-
7	0.0801	10309.2	0	?	0	525	Calibration	-
8	0.0901	10327.4	0	?	0	525	Calibration	-
9	0.1002	10293.2	0	?	0	525	Calibration	-
10	0.1102	10312.3	0	?	0	525	Calibration	-
11	0.1202	10289	0	?	0	525	Calibration	-
12	0.1302	10258.7	0	?	0	525	Calibration	-
13	0.1402	10258.8	0	?	0	525	Calibration	-
14	0.1502	10275.9	0	?	0	525	Calibration	-
15	0.1603	10246.1	0	?	0	525	Calibration	-
16	0.1703	10203.8	0	?	0	525	Calibration	-
17	0.1803	10176.8	0	?	0	525	Calibration	-
18	0.1903	10107.7	0	?	0	525	Calibration	-
19	0.2003	10105.9	0	?	0	525	Calibration	-
20	0.2103	10172.8	0	?	0	525	Calibration	-
21	0.2203	10086.1	0	?	0	525	Calibration	-
22	0.2304	10090.9	0	?	0	525	Calibration	-
23	0.2404	10150.4	0	?	0	525	Calibration	-
24	0.2504	10095.8	0	?	0	525	Calibration	-
25	0.2604	9945.84	0	?	0	525	Calibration	-
26	0.2704	10016.4	0	?	0	525	Calibration	-
27	0.2804	10132.9	0	?	0	525	Calibration	-
28	0.2905	10168	0	?	0	525	Calibration	-
29	0.3005	10154.5	0	?	0	525	Calibration	-
30	0.3105	10113.7	0	?	0	525	Calibration	-
31	0.3205	10132.7	0	?	0	525	Calibration	-
32	0.3305	10185.5	0	?	0	525	Calibration	-
33	0.3405	10266.4	0	?	0	525	Calibration	-
34	0.3506	10454.1	0	?	0	525	Calibration	-
35	0.3606	10438.8	0	?	0	525	Calibration	-
36	0.3706	10328.8	0	?	0	525	Calibration	-
37	0.3806	10217.4	0	?	0	525	Calibration	-
38	0.3906	10159.3	0	?	0	525	Calibration	-
39	0.4006	10198	0	?	0	525	Calibration	-
40	0.4107	10219.3	0	?	0	525	Calibration	-
41	0.4207	10284.8	0	?	0	525	Calibration	-
42	0.4307	10281.4	0	?	0	525	Calibration	-
43	0.4407	10268.2	0	?	0	525	Calibration	-
44	0.4507	10131.3	0	?	0	525	Calibration	-
45	0.4607	10054.9	0	?	0	525	Calibration	-
46	0.4707	10177.8	0	?	0	525	Calibration	-
47	0.4808	10258.8	0	?	0	525	Calibration	-
48	0.4908	10235	0	?	0	525	Calibration	-
49	0.5008	10181.4	0	?	0	525	Calibration	-
50	0.5108	10183.5	0	?	0	525	Calibration	-
51	0.5208	10213.7	0	?	0	525	Calibration	-
52	0.5308	10203.3	0	?	0	525	Calibration	-
53	0.5409	10139.7	0	?	0	525	Calibration	-
54	0.5509	10101.8	0	?	0	525	Calibration	-
55	0.5609	10068.7	0	?	0	525	Calibration	-
56	0.5709	10112.5	0	?	0	525	Calibration	-
57	0.5809	10177.5	0	?	0	525	Calibration	-
58	0.5909	10177.7	0	?	0	525	Calibration	-
59	0.601	10119.7	0	?	0	525	Calibration	-
60	0.611	10038.2	0	?	0	525	Calibration	-
61	0.621	10009.7	0	?	0	525	Calibration	-
62	0.631	10036.7	0	?	0	525	Calibration	-
63	0.641	10116.9	0	?	0	525	Calibration	-
64	0.651	10135.4	0	?	0	525	Calibration	-
65	0.661	9946.17	0	?	0	525	Calibration	-
66	0.6711	10014.2	0	?	0	525	Calibration	-
67	0.6811	10093.6	0	?	0	525	Calibration	-
68	0.6911	10200.5	0	?	0	525	Calibration	-
69	0.7011	10173.3	0	?	0	525	Calibration	-
70	0.7111	10189.5	0	?	0	525	Calibration	-
71	0.7211	10143.8	0	?	0	525	Calibration	-
72	0.7312	10061	0	?	0	525	Calibration	-
73	0.7412	10118.2	0	?	0	525	Calibration	-
74	0.7512	10142.2	0	?	0	525	Calibration	-
75	0.7612	10077.6	0	?	0	525	Calibration	-
76	0.7712	10080.4	0	?	0	525	Calibration	-
77	0.7812	10123	0	?	0	525	Calibration	-
78	0.7913	10068.8	0	?	0	525	Calibration	-
79	0.8013	10102	0	?	0	525	Calibration	-
80	0.8113	10119.9	0	?	0	525	Calibration	-
81	0.8213	10107.3	0	?	0	525	Calibration	-
82	0.8313	10175.5	0	?	0	525	Calibration	-
83	0.8413	10134.7	0	?	0	525	Calibration	-
84	0.8514	10137.4	0	?	0	525	Calibration	-
85	0.8614	10153.5	0	?	0	525	Calibration	-
86	0.8714	10180.2	0	?	0	525	Calibration	-
87	0.8814	10193.2	0	?	0	525	Calibration	-
88	0.8914	10124.5	0	?	0	525	Calibration	-
89	0.9014	10009.3	0	?	0	525	Calibration	-
90	0.9114	9964.1	0	?	0	525	Calibration	-
91	0.9215	10050.9	0	?	0	525	Calibration	-
92	0.9315	10055.2	0	?	0	525	Calibration	-
93	0.9415	10127.7	0	?	0	525	Calibration	-
94	0.9515	10131.2	0	?	0	525	Calibration	-
95	0.9615	10108	0	?	0	525	Calibration	-
96	0.9715	10155.9	0	?	0	525	Calibration	-
97	0.9816	10153.2	0	?	0	525	Calibration	-
98	0.9916	10148	0	?	0	525	Calibration	-
99	1.0016	10097.2	0	?	0	525	Calibration	-
100	1.0116	10068.1	0	?	0	525	Calibration	-
101	1.0216	10105.8	0	?	0	525	Calibration	-
102	1.0316	10082	0	?	0	525	Calibration	-
103	1.0417	10103.1	0	?	0	525	Calibration	-
104	1.0517	10188.2	0	?	0	525	Calibration	-
105	1.0617	10216.5	0	?	0	525	Calibration	-
106	1.0717	10186.7	0	?	0	525	Calibration	-
107	1.0817	10142.2	0	?	0	525	Calibration	-
108	1.0917	10178.3	0	?	0	525	Calibration	-
109	1.1017	10219.9	0	?	0	525	Calibration	-
110	1.1118	10234.8	0	?	0	525	Calibration	-
111	1.1218	10214	0	?	0	525	Calibration	-
112	1.1318	10180.5	0	?	0	525	Calibration	-
113	1.1418	10189.4	0	?	0	525	Calibration	-
114	1.1518	10151.9	0	?	0	525	Calibration	-
115	1.1618	10172.4	0	?	0	525	Calibration	-
116	1.1719	10229.1	0	?	0	525	Calibration	-
117	1.1819	10204.5	0	?	0	525	Calibration	-
118	1.1919	10233.7	0	?	0	525	Calibration	-
119	1.2019	10305.9	0	?	0	525	Calibration	-
120	1.2119	10299.6	0	?	0	525	Calibration	-
121	1.2219	10229.2	0	?	0	525	Calibration	-
122	1.232	10229.5	0	?	0	525	Calibration	-
123	1.242	10247.3	0	?	0	525	Calibration	-
124	1.252	10272.2	0	?	0	525	Calibration	-
125	1.262	10235.9	0	?	0	525	Calibration	-
126	1.272	10161.3	0	?	0	525	Calibration	-
127	1.282	10151.9	0	?	0	525	Calibration	-
128	1.2921	10195.3	0	?	0	525	Calibration	-
129	1.3021	10170	0	?	0	525	Calibration	-
130	1.3121	10097.1	0	?	0	525	Calibration	-
131	1.3221	10125.1	0	?	0	525	Calibration	-
132	1.3321	10216.2	0	?	0	525	Calibration	-
133	1.3421	10227.8	0	?	0	525	Calibration	-
134	1.3521	10194.6	0	?	0	525	Calibration	-
135	1.3622	10176.3	0	?	0	525	Calibration	-
136	1.3722	10201.4	0	?	0	525	Calibration	-
137	1.3822	10184	0	?	0	525	Calibration	-
138	1.3922	10210.4	0	?	0	525	Calibration	-
139	1.4022	10259.5	0	?	0	525	Calibration	-
140	1.4122	10164.5	0	?	0	525	Calibration	-
141	1.4223	10079.1	0	?	0	525	Calibration	-
142	1.4323	10134.7	0	?	0	525	Calibration	-
143	1.4423	10165.6	0	?	0	525	Calibration	-
144	1.4523	10196.6	0	?	0	525	Calibration	-
145	1.4623	10222.6	0	?	0	525	Calibration	-
146	1.4723	10192.4	0	?	0	525	Calibration	-
147	1.4824	10159.1	0	?	0	525	Calibration	-
148	1.4924	10066	0	?	0	525	Calibration	-
149	1.5024	10095	0	?	0	525	Calibration	-
150	1.5124	10133	0	?	0	525	Calibration	-
151	1.5224	10257.2	0	?	0	525	Calibration	-
152	1.5324	10324.5	0	?	0	525	Calibration	-
153	1.5424	10349.2	0	?	0	525	Calibration	-
154	1.5525	10339.7	0	?	0	525	Calibration	-
155	1.5625	10296	0	?	0	525	Calibration	-
156	1.5725	10268.6	0	?	0	525	Calibration	-
157	1.5825	10254.6	0	?	0	525	Calibration	-
158	1.5925	10265.6	0	?	0	525	Calibration	-
159	1.6025	10248.9	0	?	0	525	Calibration	-
160	1.6126	10210	0	?	0	525	Calibration	-
161	1.6226	10232.4	0	?	0	525	Calibration	-
162	1.6326	10237.6	0	?	0	525	Calibration	-
163	1.6426	10274.8	0	?	0	525	Calibration	-
164	1.6526	10265.9	0	?	0	525	Calibration	-
165	1.6626	10194.5	0	?	0	525	Calibration	-
166	1.6727	10181.3	0	?	0	525	Calibration	-
167	1.6827	10115.7	0	?	0	525	Calibration	-
168	1.6927	10038.1	0	?	0	525	Calibration	-
169	1.7027	10067.9	0	?	0	525	Calibration	-
170	1.7127	10126	0	?	0	525	Calibration	-
171	1.7227	10172.2	0	?	0	525	Calibration	-
172	1.7328	10169.7	0	?	0	525	Calibration	-
173	1.7428	10168.6	0	?	0	525	Calibration	-
174	1.7528	10169.6	0	?	0	525	Calibration	-
175	1.7628	10186.1	0	?	0	525	Calibration	-
176	1.7728	10181.3	0	?	0	525	Calibration	-
177	1.7828	10160.8	0	?	0	525	Calibration	-
178	1.7928	10179.9	0	?	0	525	Calibration	-
179	1.8029	10123.8	0	?	0	525	Calibration	-
180	1.8129	10123.5	0	?	0	525	Calibration	-
181	1.8229	10191.5	0	?	0	525	Calibration	-
182	1.8329	10164.5	0	?	0	525	Calibration	-
183	1.8429	10225.8	0	?	0	525	Calibration	-
184	1.8529	10216.1	0	?	0	525	Calibration	-
185	1.863	10120.4	0	?	0	525	Calibration	-
186	1.873	10120.6	0	?	0	525	Calibration	-
187	1.883	10027.3	0	?	0	525	Calibration	-
188	1.893	10165.7	0	?	0	525	Calibration	-
189	1.903	10206.6	0	?	0	525	Calibration	-
190	1.913	10200.5	0	?	0	525	Calibration	-
191	1.9231	10116.3	0	?	0	525	Calibration	-
192	1.9331	10171.9	0	?	0	525	Calibration	-
193	1.9431	10265.1	0	?	0	525	Calibration	-
194	1.9531	10263.7	0	?	0	525	Calibration	-
195	1.9631	10149.1	0	?	0	525	Calibration	-
196	1.9731	10105.8	0	?	0	525	Calibration	-
197	1.9831	10141	0	?	0	525	Calibration	-
198	1.9932	10185.7	0	?	0	525	Calibration	-
199	2.0032	10157.9	0	?	0	525	Calibration	-
200	2.0132	10146.4	0	?	0	525	Calibration	-
201	2.0232	10069.1	0	?	0	525	Calibration	-
202	2.0332	10079.3	0	?	0	525	Calibration	-
203	2.0432	10177.2	0	?	0	525	Calibration	-
204	2.0533	10209.3	0	?	0	525	Calibration	-
205	2.0633	10231	0	?	0	525	Calibration	-
206	2.0733	10234	0	?	0	525	Calibration	-
207	2.0833	10206.5	0	?	0	525	Calibration	-
208	2.0933	10144.3	0	?	0	525	Calibration	-
209	2.1033	10166.8	0	?	0	525	Calibration	-
210	2.1134	10107	0	?	0	525	Calibration	-
211	2.1234	10064	0	?	0	525	Calibration	-
212	2.1334	10093.6	0	?	0	525	Calibration	-
213	2.1434	10133.3	0	?	0	525	Calibration	-
214	2.1534	10125.9	0	?	0	525	Calibration	-
215	2.1634	10126.9	0	?	0	525	Calibration	-
216	2.1735	10170.2	0	?	0	525	Calibration	-
217	2.1835	10157.9	0	?	0	525	Calibration	-
218	2.1935	10162.5	0	?	0	525	Calibration	-
219	2.2035	10214.9	0	?	0	525	Calibration	-
220	2.2135	10156.9	0	?	0	525	Calibration	-
221	2.2235	10047.6	0	?	0	525	Calibration	-
222	2.2335	10128.1	0	?	0	525	Calibration	-
223	2.2436	10165.3	0	?	0	525	Calibration	-
224	2.2536	10074.4	0	?	0	525	Calibration	-
225	2.2636	10041.1	0	?	0	525	Calibration	-
226	2.2736	10101.2	0	?	0	525	Calibration	-
227	2.2836	10074.3	0	?	0	525	Calibration	-
228	2.2936	10118.6	0	?	0	525	Calibration	-
229	2.3037	10089.6	0	?	0	525	Calibration	-
230	2.3137	10081.5	0	?	0	525	Calibration	-
231	2.3237	10009.3	0	?	0	525	Calibration	-
232	2.3337	10096	0	?	0	525	Calibration	-
233	2.3437	10044.6	0	?	0	525	Calibration	-
234	2.3537	9986.82	0	?	0	525	Calibration	-
235	2.3638	9978.22	0	?	0	525	Calibration	-
236	2.3738	9962.51	0	?	0	525	Calibration	-
237	2.3838	9996.84	0	?	0	525	Calibration	-
238	2.3938	10049.7	0	?	0	525	Calibration	-
239	2.4038	10061.2	0	?	0	525	Calibration	-
240	2.4138	10004	0	?	0	525	Calibration	-
241	2.4238	9977.65	0	?	0	525	Calibration	-
242	2.4339	10031.5	0	?	0	525	Calibration	-
243	2.4439	10047	0	?	0	525	Calibration	-
244	2.4539	10125.3	0	?	0	525	Calibration	-
245	2.4639	10119.5	0	?	0	525	Calibration	-
246	2.4739	10105.2	0	?	0	525	Calibration	-
247	2.4839	10047.1	0	?	0	525	Calibration	-
248	2.494	10183	0	?	0	525	Calibration	-
249	2.504	10098.8	0	?	0	525	Calibration	-
250	2.514	10092.7	0	?	0	525	Calibration	-
251	2.524	9938.71	0	?	0	525	Calibration	-
252	2.534	10033.6	0	?	0	525	Calibration	-
253	2.544	10092	0	?	0	525	Calibration	-
254	2.5541	10084.1	0	?	0	525	Calibration	-
255	2.5641	10105.9	0	?	0	525	Calibration	-
256	2.5741	10130.4	0	?	0	525	Calibration	-
257	2.5841	10063.2	0	?	0	525	Calibration	-
258	2.5941	10068.8	0	?	0	525	Calibration	-
259	2.6041	10029.1	0	?	0	525	Calibration	-
260	2.6142	10030.4	0	?	0	525	Calibration	-
261	2.6242	10114.6	0	?	0	525	Calibration	-
262	2.6342	10151.4	0	?	0	525	Calibration	-
263	2.6442	10152.2	0	?	0	525	Calibration	-
264	2.6542	10168.8	0	?	0	525	Calibration	-
265	2.6642	10045.8	0	?	0	525	Calibration	-
266	2.6742	9945.49	0	?	0	525	Calibration	-
267	2.6843	10006.2	0	?	0	525	Calibration	-
268	2.6943	10028.7	0	?	0	525	Calibration	-
269	2.7043	10111.7	0	?	0	525	Calibration	-
270	2.7143	10097.1	0	?	0	525	Calibration	-
271	2.7243	10126.1	0	?	0	525	Calibration	-
272	2.7343	10082.1	0	?	0	525	Calibration	-
273	2.7444	10149	0	?	0	525	Calibration	-
274	2.7544	10181.5	0	?	0	525	Calibration	-
275	2.7644	10069.6	0	?	0	525	Calibration	-
276	2.7744	10047.8	0	?	0	525	Calibration	-
277	2.7844	10103.5	0	?	0	525	Calibration	-
278	2.7944	10143.2	0	?	0	525	Calibration	-
279	2.8045	10114.8	0	?	0	525	Calibration	-
280	2.8145	10024.2	0	?	0	525	Calibration	-
281	2.8245	10046	0	?	0	525	Calibration	-
282	2.8345	10050.3	0	?	0	525	Calibration	-
283	2.8445	10033	0	?	0	525	Calibration	-
284	2.8545	10058.6	0	?	0	525	Calibration	-
285	2.8645	10024.4	0	?	0	525	Calibration	-
286	2.8746	10105.9	0	?	0	525	Calibration	-
287	2.8846	10131.4	0	?	0	525	Calibration	-
288	2.8946	10297.5	0	?	0	525	Calibration	-
289	2.9046	10294.2	0	?	0	525	Calibration	-
290	2.9146	10217.9	0	?	0	525	Calibration	-
291	2.9246	10192.3	0	?	0	525	Calibration	-
292	2.9347	10224.6	0	?	0	525	Calibration	-
293	2.9447	10174.5	0	?	0	525	Calibration	-
294	2.9547	10156	0	?	0	525	Calibration	-
295	2.9647	10147.6	0	?	0	525	Calibration	-
296	2.9747	10121	0	?	0	525	Calibration	-
297	2.9847	10069.4	0	?	0	525	Calibration	-
298	2.9948	10081.1	0	?	0	525	Calibration	-
299	3.0048	10103.8	0	?	0	525	Calibration	-
300	3.0148	10096.5	0	?	0	525	Calibration	-
301	3.0248	10101.6	0	?	0	525	Calibration	-
302	3.0348	10168.5	0	?	0	525	Calibration	-
303	3.0448	10121.5	0	?	0	525	Calibration	-
304	3.0548	9997.26	0	?	0	525	Calibration	-
305	3.0649	10069.8	0	?	0	525	Calibration	-
306	3.0749	10174.2	0	?	0	525	Calibration	-
307	3.0849	10181.2	0	?	0	525	Calibration	-
308	3.0949	10156.9	0	?	0	525	Calibration	-
309	3.1049	10194.2	0	?	0	525	Calibration	-
310	3.1149	10145.3	0	?	0	525	Calibration	-
311	3.125	10085.5	0	?	0	525	Calibration	-
312	3.135	10080.4	0	?	0	525	Calibration	-
313	3.145	10144.3	0	?	0	525	Calibration	-
314	3.155	10174	0	?	0	525	Calibration	-
315	3.165	10154.2	0	?	0	525	Calibration	-
316	3.175	10171	0	?	0	525	Calibration	-
317	3.1851	10123.3	0	?	0	525	Calibration	-
318	3.1951	10091.5	0	?	0	525	Calibration	-
319	3.2051	10132.1	0	?	0	525	Calibration	-
320	3.2151	10051.4	0	?	0	525	Calibration	-
321	3.2251	10051.4	0	?	0	525	Calibration	-
322	3.2351	10017.4	0	?	0	525	Calibration	-
323	3.2452	9972.3	0	?	0	525	Calibration	-
324	3.2552	9967.94	0	?	0	525	Calibration	-
325	3.2652	9991.45	0	?	0	525	Calibration	-
326	3.2752	9945.43	0	?	0	525	Calibration	-
327	3.2852	9966.46	0	?	0	525	Calibration	-
328	3.2952	9995.08	0	?	0	525	Calibration	-
329	3.3052	10063.1	0	?	0	525	Calibration	-
330	3.3153	10088.9	0	?	0	525	Calibration	-
331	3.3253	10081.5	0	?	0	525	Calibration	-
332	3.3353	10095.7	0	?	0	525	Calibration	-
333	3.3453	10094.1	0	?	0	525	Calibration	-
334	3.3553	10006.2	0	?	0	525	Calibration	-
335	3.3653	10069.8	0	?	0	525	Calibration	-
336	3.3754	10078.7	0	?	0	525	Calibration	-
337	3.3854	10078.7	0	?	0	525	Calibration	-
338	3.3954	10094.6	0	?	0	525	Calibration	-
339	3.4054	10015.1	0	?	0	525	Calibration	-
340	3.4154	9919.4	0	?	0	525	Calibration	-
341	3.4254	10003	0	?	0	525	Calibration	-
342	3.4355	9925.33	0	?	0	525	Calibration	-
343	3.4455	9937.31	0	?	0	525	Calibration	-
344	3.4555	9927.09	0	?	0	525	Calibration	-
345	3.4655	10033.4	0	?	0	525	Calibration	-
346	3.4755	10092.3	0	?	0	525	Calibration	-
347	3.4855	10127.4	0	?	0	525	Calibration	-
348	3.4955	10087	0	?	0	525	Calibration	-
349	3.5056	10054.4	0	?	0	525	Calibration	-
350	3.5156	10121.9	0	?	0	525	Calibration	-
351	3.5256	10110	0	?	0	525	Calibration	-
352	3.5356	10040.9	0	?	0	525	Calibration	-
353	3.5456	10026.3	0	?	0	525	Calibration	-
354	3.5556	10090.8	0	?	0	525	Calibration	-
355	3.5657	10095.8	0	?	0	525	Calibration	-
356	3.5757	10092.3	0	?	0	525	Calibration	-
357	3.5857	10040.7	0	?	0	525	Calibration	-
358	3.5957	9985.06	0	?	0	525	Calibration	-
359	3.6057	9960.88	0	?	0	525	Calibration	-
360	3.6157	9940.79	0	?	0	525	Calibration	-
361	3.6258	9975.62	0	?	0	525	Calibration	-
362	3.6358	10000.5	0	?	0	525	Calibration	-
363	3.6458	9953.01	0	?	0	525	Calibration	-
364	3.6558	9964.61	0	?	0	525	Calibration	-
365	3.6658	9941.3	0	?	0	525	Calibration	-
366	3.6758	9938.69	0	?	0	525	Calibration	-
367	3.6859	10050.6	0	?	0	525	Calibration	-
368	3.6959	10100.4	0	?	0	525	Calibration	-
369	3.7059	10078.9	0	?	0	525	Calibration	-
370	3.7159	9927.23	0	?	0	525	Calibration	-
371	3.7259	10005.2	0	?	0	525	Calibration	-
372	3.7359	9998.52	0	?	0	525	Calibration	-
373	3.7459	10000.6	0	?	0	525	Calibration	-
374	3.756	10041.4	0	?	0	525	Calibration	-
375	3.766	9995.4	0	?	0	525	Calibration	-
376	3.776	10080	0	?	0	525	Calibration	-
377	3.786	10044.5	0	?	0	525	Calibration	-
378	3.796	10063	0	?	0	525	Calibration	-
379	3.806	10027.5	0	?	0	525	Calibration	-
380	3.8161	9976.32	0	?	0	525	Calibration	-
381	3.8261	9939.92	0	?	0	525	Calibration	-
382	3.8361	9932.19	0	?	0	525	Calibration	-
383	3.8461	10016.4	0	?	0	525	Calibration	-
384	3.8561	10029.1	0	?	0	525	Calibration	-
385	3.8661	9976.4	0	?	0	525	Calibration	-
386	3.8762	9891.61	0	?	0	525	Calibration	-
387	3.8862	9981.41	0	?	0	525	Calibration	-
388	3.8962	9888.74	0	?	0	525	Calibration	-
389	3.9062	9883.63	0	?	0	525	Calibration	-
390	3.9162	9932.42	0	?	0	525	Calibration	-
391	3.9262	9853.49	0	?	0	525	Calibration	-
392	3.9362	9951.4	0	?	0	525	Calibration	-
393	3.9463	9998.44	0	?	0	525	Calibration	-
394	3.9563	10070.8	0	?	0	525	Calibration	-
395	3.9663	9979.8	0	?	0	525	Calibration	-
396	3.9763	9953.16	0	?	0	525	Calibration	-
397	3.9863	9932.35	0	?	0	525	Calibration	-
398	3.9963	9963.1	0	?	0	525	Calibration	-
399	4.0064	9903.84	0	?	0	525	Calibration	-
400	4.0164	9964.8	0	?	0	525	Calibration	-
401	4.0264	10028	0	?	0	525	Calibration	-
402	4.0364	9991.97	0	?	0	525	Calibration	-
403	4.0464	9958.37	0	?	0	525	Calibration	-
404	4.0564	9858.47	0	?	0	525	Calibration	-
405	4.0665	9966.19	0	?	0	525	Calibration	-
406	4.0765	10008.7	0	?	0	525	Calibration	-
407	4.0865	9993.61	0	?	0	525	Calibration	-
408	4.0965	10008.7	0	?	0	525	Calibration	-
409	4.1065	10014.5	0	?	0	525	Calibration	-
410	4.1165	9990.52	0	?	0	525	Calibration	-
411	4.1266	9924.13	0	?	0	525	Calibration	-
412	4.1366	9949.2	0	?	0	525	Calibration	-
413	4.1466	9898.77	0	?	0	525	Calibration	-
414	4.1566	9902.51	0	?	0	525	Calibration	-
415	4.1666	9989.78	0	?	0	525	Calibration	-
416	4.1766	10003.7	0	?	0	525	Calibration	-
417	4.1866	10000.1	0	?	0	525	Calibration	-
418	4.1967	10017.1	0	?	0	525	Calibration	-
419	4.2067	10008.3	0	?	0	525	Calibration	-
420	4.2167	10001.6	0	?	0	525	Calibration	-
421	4.2267	10039.7	0	?	0	525	Calibration	-
422	4.2367	10024.7	0	?	0	525	Calibration	-
423	4.2467	10020.5	0	?	0	525	Calibration	-
424	4.2568	10046.2	0	?	0	525	Calibration	-
425	4.2668	9965.31	0	?	0	525	Calibration	-
426	4.2768	9805.45	0	?	0	525	Calibration	-
427	4.2868	9855.07	0	?	0	525	Calibration	-
428	4.2968	9927.9	0	?	0	525	Calibration	-
429	4.3068	10006	0	?	0	525	Calibration	-
430	4.3169	10069.4	0	?	0	525	Calibration	-
431	4.3269	10032.2	0	?	0	525	Calibration	-
432	4.3369	9919.23	0	?	0	525	Calibration	-
433	4.3469	9960.57	0	?	0	525	Calibration	-
434	4.3569	9979.76	0	?	0	525	Calibration	-
435	4.3669	9884.8	0	?	0	525	Calibration	-
436	4.3769	9868.92	0	?	0	525	Calibration	-
437	4.387	9911.72	0	?	0	525	Calibration	-
438	4.397	9943.4	0	?	0	525	Calibration	-
439	4.407	9987.8	0	?	0	525	Calibration	-
440	4.417	9971.06	0	?	0	525	Calibration	-
441	4.427	9948.13	0	?	0	525	Calibration	-
442	4.437	9882.35	0	?	0	525	Calibration	-
443	4.4471	9914.24	0	?	0	525	Calibration	-
444	4.4571	9940.58	0	?	0	525	Calibration	-
445	4.4671	9850.05	0	?	0	525	Calibration	-
446	4.4771	9947.44	0	?	0	525	Calibration	-
447	4.4871	9940.31	0	?	0	525	Calibration	-
448	4.4971	9970.3	0	?	0	525	Calibration	-
449	4.5072	10012.6	0	?	0	525	Calibration	-
450	4.5172	10032.3	0	?	0	525	Calibration	-
451	4.5272	10009.7	0	?	0	525	Calibration	-
452	4.5372	9974.89	0	?	0	525	Calibration	-
453	4.5472	9852.37	0	?	0	525	Calibration	-
454	4.5572	9837.49	0	?	0	525	Calibration	-
455	4.5673	9902.24	0	?	0	525	Calibration	-
456	4.5773	9915.45	0	?	0	525	Calibration	-
457	4.5873	9980.14	0	?	0	525	Calibration	-
458	4.5973	9931.94	0	?	0	525	Calibration	-
459	4.6073	10054.4	0	?	0	525	Calibration	-
460	4.6173	10096	0	?	0	525	Calibration	-
461	4.6273	10076.1	0	?	0	525	Calibration	-
462	4.6374	10062.2	0	?	0	525	Calibration	-
463	4.6474	10008.4	0	?	0	525	Calibration	-
464	4.6574	10035.4	0	?	0	525	Calibration	-
465	4.6674	9999.24	0	?	0	525	Calibration	-
466	4.6774	9992.87	0	?	0	525	Calibration	-
467	4.6874	10003.5	0	?	0	525	Calibration	-
468	4.6975	9968.72	0	?	0	525	Calibration	-
469	4.7075	10037.7	0	?	0	525	Calibration	-
470	4.7175	10110.4	0	?	0	525	Calibration	-
471	4.7275	10096.4	0	?	0	525	Calibration	-
472	4.7375	9998.8	0	?	0	525	Calibration	-
473	4.7475	9986.92	0	?	0	525	Calibration	-
474	4.7576	9974.36	0	?	0	525	Calibration	-
475	4.7676	9895.12	0	?	0	525	Calibration	-
476	4.7776	9908.68	0	?	0	525	Calibration	-
477	4.7876	9956.48	0	?	0	525	Calibration	-
478	4.7976	9944.38	0	?	0	525	Calibration	-
479	4.8076	9874.17	0	?	0	525	Calibration	-
480	4.8176	9930.24	0	?	0	525	Calibration	-
481	4.8277	9979.89	0	?	0	525	Calibration	-
482	4.8377	9974.34	0	?	0	525	Calibration	-
483	4.8477	9970.9	0	?	0	525	Calibration	-
484	4.8577	10040.5	0	?	0	525	Calibration	-
485	4.8677	10045.7	0	?	0	525	Calibration	-
486	4.8777	10004.7	0	?	0	525	Calibration	-
487	4.8878	9970.44	0	?	0	525	Calibration	-
488	4.8978	9944.96	0	?	0	525	Calibration	-
489	4.9078	9881.02	0	?	0	525	Calibration	-
490	4.9178	9909.35	0	?	0	525	Calibration	-
491	4.9278	9954.77	0	?	0	525	Calibration	-
492	4.9378	10075	0	?	0	525	Calibration	-
493	4.9479	10031.8	0	?	0	525	Calibration	-
494	4.9579	10029.3	0	?	0	525	Calibration	-
495	4.9679	9995.3	0	?	0	525	Calibration	-
496	4.9779	10000	0	?	0	525	Calibration	-
497	4.9879	9962.7	0	?	0	525	Calibration	-
498	4.9979	9978.21	0	?	0	525	Calibration	-
499	5.008	9993.01	0	?	0	525	Calibration	-
500	5.018	10007.3	0	?	0	525	Calibration	-
501	5.028	9926.91	0	?	0	525	Calibration	-
502	5.038	9916.17	0	?	0	525	Calibration	-
503	5.048	9909.82	0	?	0	525	Calibration	-
504	5.058	9832.88	0	?	0	525	Calibration	-
505	5.068	9842.85	0	?	0	525	Calibration	-
506	5.0781	9876.82	0	?	0	525	Calibration	-
507	5.0881	9910.67	0	?	0	525	Calibration	-
508	5.0981	9912.76	0	?	0	525	Calibration	-
509	5.1081	9858.06	0	?	0	525	Calibration	-
510	5.1181	9903.29	0	?	0	525	Calibration	-
511	5.1281	9909.79	0	?	0	525	Calibration	-
512	5.1382	9936.91	0	?	0	525	Calibration	-
513	5.1482	9971.75	0	?	0	525	Calibration	-
514	5.1582	9942.17	0	?	0	525	Calibration	-
515	5.1682	10039.4	0	?	0	525	Calibration	-
516	5.1782	10024.3	0	?	0	525	Calibration	-
517	5.1882	10016.2	0	?	0	525	Calibration	-
518	5.1983	9927.25	0	?	0	525	Calibration	-
519	5.2083	9827.48	0	?	0	525	Calibration	-
520	5.2183	9872.7	0	?	0	525	Calibration	-
521	5.2283	9927.82	0	?	0	525	Calibration	-
522	5.2383	10013	0	?	0	525	Calibration	-
523	5.2483	9993.15	0	?	0	525	Calibration	-
524	5.2583	9876.85	0	?	0	525	Calibration	-
525	5.2684	9830.43	0	?	0	525	Calibration	-
526	5.2784	9868.52	0	?	0	525	Calibration	-
527	5.2884	9890.51	0	?	0	525	Calibration	-
528	5.2984	9922.82	0	?	0	525	Calibration	-
529	5.3084	9943.7	0	?	0	525	Calibration	-
530	5.3184	9928.24	0	?	0	525	Calibration	-
531	5.3285	9876.12	0	?	0	525	Calibration	-
532	5.3385	9838.72	0	?	0	525	Calibration	-
533	5.3485	9966.09	0	?	0	525	Calibration	-
534	5.3585	9998.05	0	?	0	525	Calibration	-
535	5.3685	9968.53	0	?	0	525	Calibration	-
536	5.3785	10009.7	0	?	0	525	Calibration	-
537	5.3886	9905.97	0	?	0	525	Calibration	-
538	5.3986	9945.55	0	?	0	525	Calibration	-
539	5.4086	9913.02	0	?	0	525	Calibration	-
540	5.4186	10016	0	?	0	525	Calibration	-
541	5.4286	10082.8	0	?	0	525	Calibration	-
542	5.4386	10075.8	0	?	0	525	Calibration	-
543	5.4487	10034.8	0	?	0	525	Calibration	-
544	5.4587	9964.99	0	?	0	525	Calibration	-
545	5.4687	9975.86	0	?	0	525	Calibration	-
546	5.4787	9956.55	0	?	0	525	Calibration	-
547	5.4887	10026.4	0	?	0	525	Calibration	-
548	5.4987	10080.7	0	?	0	525	Calibration	-
549	5.5087	10090.3	0	?	0	525	Calibration	-
550	5.5188	10073.8	0	?	0	525	Calibration	-
551	5.5288	10054.3	0	?	0	525	Calibration	-
552	5.5388	10008.5	0	?	0	525	Calibration	-
553	5.5488	10119.1	0	?	0	525	Calibration	-
554	5.5588	10159.7	0	?	0	525	Calibration	-
555	5.5688	10079.4	0	?	0	525	Calibration	-
556	5.5789	10010.7	0	?	0	525	Calibration	-
557	5.5889	9991.59	0	?	0	525	Calibration	-
558	5.5989	10055.7	0	?	0	525	Calibration	-
559	5.6089	10039.2	0	?	0	525	Calibration	-
560	5.6189	10045.1	0	?	0	525	Calibration	-
561	5.6289	9986.18	0	?	0	525	Calibration	-
562	5.639	9953.99	0	?	0	525	Calibration	-
563	5.649	9999.88	0	?	0	525	Calibration	-
564	5.659	10034.3	0	?	0	525	Calibration	-
565	5.669	10029.6	0	?	0	525	Calibration	-
566	5.679	9989.23	0	?	0	525	Calibration	-
567	5.689	9883.06	0	?	0	525	Calibration	-
568	5.699	9933.49	0	?	0	525	Calibration	-
569	5.7091	10003.3	0	?	0	525	Calibration	-
570	5.7191	9994.26	0	?	0	525	Calibration	-
571	5.7291	10019	0	?	0	525	Calibration	-
572	5.7391	10024.7	0	?	0	525	Calibration	-
573	5.7491	9955.41	0	?	0	525	Calibration	-
574	5.7591	9911.99	0	?	0	525	Calibration	-
575	5.7692	9853.21	0	?	0	525	Calibration	-
576	5.7792	9922.7	0	?	0	525	Calibration	-
577	5.7892	9945.18	0	?	0	525	Calibration	-
578	5.7992	9917.33	0	?	0	525	Calibration	-
579	5.8092	9924.8	0	?	0	525	Calibration	-
580	5.8192	9991.72	0	?	0	525	Calibration	-
581	5.8293	10053	0	?	0	525	Calibration	-
582	5.8393	10122.2	0	?	0	525	Calibration	-
583	5.8493	9918.39	0	?	0	525	Calibration	-
584	5.8593	9928.15	0	?	0	525	Calibration	-
585	5.8693	9971.94	0	?	0	525	Calibration	-
586	5.8793	10158.6	0	?	0	525	Calibration	-
587	5.8893	10097.5	0	?	0	525	Calibration	-
588	5.8994	10065.5	0	?	0	525	Calibration	-
589	5.9094	10029.2	0	?	0	525	Calibration	-
590	5.9194	9897.06	0	?	0	525	Calibration	-
591	5.9294	9940.95	0	?	0	525	Calibration	-
592	5.9394	9987.89	0	?	0	525	Calibration	-
593	5.9494	10033.1	0	?	0	525	Calibration	-
594	5.9595	10105.8	0	?	0	525	Calibration	-
595	5.9695	10127.9	0	?	0	525	Calibration	-
596	5.9795	10114.8	0	?	0	525	Calibration	-
597	5.9895	10079.9	0	?	0	525	Calibration	-
598	5.9995	10066.3	0	?	0	525	Calibration	-
599	6.0095	10052.2	0	?	0	525	Calibration	-
600	6.0196	10075.1	0	?	0	525	Calibration	-
601	6.0296	10049.4	0	?	0	525	Calibration	-
602	6.0396	10005.6	0	?	0	525	Calibration	-
603	6.0496	9968.55	0	?	0	525	Calibration	-
604	6.0596	9997.18	0	?	0	525	Calibration	-
605	6.0696	10001.7	0	?	0	525	Calibration	-
606	6.0797	9997.9	0	?	0	525	Calibration	-
607	6.0897	9942.08	0	?	0	525	Calibration	-
608	6.0997	9932.16	0	?	0	525	Calibration	-
609	6.1097	9935.64	0	?	0	525	Calibration	-
610	6.1197	9958.33	0	?	0	525	Calibration	-
611	6.1297	10002.3	0	?	0	525	Calibration	-
612	6.1397	9975.67	0	?	0	525	Calibration	-
613	6.1498	9969.42	0	?	0	525	Calibration	-
614	6.1598	9971.61	0	?	0	525	Calibration	-
615	6.1698	10013.4	0	?	0	525	Calibration	-
616	6.1798	9964.13	0	?	0	525	Calibration	-
617	6.1898	9908.58	0	?	0	525	Calibration	-
618	6.1998	9865.4	0	?	0	525	Calibration	-
619	6.2099	9941.92	0	?	0	525	Calibration	-
620	6.2199	9892.08	0	?	0	525	Calibration	-
621	6.2299	9881.98	0	?	0	525	Calibration	-
622	6.2399	9890.59	0	?	0	525	Calibration	-
623	6.2499	9895.1	0	?	0	525	Calibration	-
624	6.2599	9852.01	0	?	0	525	Calibration	-
625	6.27	9858.04	0	?	0	525	Calibration	-
626	6.28	9889.89	0	?	0	525	Calibration	-
627	6.29	9917.32	0	?	0	525	Calibration	-
628	6.3	9963.5	0	?	0	525	Calibration	-
629	6.31	9955.33	0	?	0	525	Calibration	-
630	6.32	9926.3	0	?	0	525	Calibration	-
631	6.33	9853.02	0	?	0	525	Calibration	-
632	6.3401	9908.91	0	?	0	525	Calibration	-
633	6.3501	9891.69	0	?	0	525	Calibration	-
634	6.3601	9954.3	0	?	0	525	Calibration	-
635	6.3701	9930.09	0	?	0	525	Calibration	-
636	6.3801	9939.98	0	?	0	525	Calibration	-
637	6.3901	10000.8	0	?	0	525	Calibration	-
638	6.4002	10008.6	0	?	0	525	Calibration	-
639	6.4102	9987.34	0	?	0	525	Calibration	-
640	6.4202	10025.2	0	?	0	525	Calibration	-
641	6.4302	10001	0	?	0	525	Calibration	-
642	6.4402	10008.5	0	?	0	525	Calibration	-
643	6.4502	9976.56	0	?	0	525	Calibration	-
644	6.4603	9912.12	0	?	0	525	Calibration	-
645	6.4703	9904.07	0	?	0	525	Calibration	-
646	6.4803	9982.54	0	?	0	525	Calibration	-
647	6.4903	9938.28	0	?	0	525	Calibration	-
648	6.5003	9945.64	0	?	0	525	Calibration	-
649	6.5103	9988.71	0	?	0	525	Calibration	-
650	6.5204	9983.31	0	?	0	525	Calibration	-
651	6.5304	9929.99	0	?	0	525	Calibration	-
652	6.5404	9851.16	0	?	0	525	Calibration	-
653	6.5504	9817.23	0	?	0	525	Calibration	-
654	6.5604	9840.85	0	?	0	525	Calibration	-
655	6.5704	9881.88	0	?	0	525	Calibration	-
656	6.5804	9850.31	0	?	0	525	Calibration	-
657	6.5905	9898.65	0	?	0	525	Calibration	-
658	6.6005	9881.7	0	?	0	525	Calibration	-
659	6.6105	9888.57	0	?	0	525	Calibration	-
660	6.6205	9987.92	0	?	0	525	Calibration	-
661	6.6305	9987.82	0	?	0	525	Calibration	-
662	6.6405	10009.8	0	?	0	525	Calibration	-
663	6.6506	9931.12	0	?	0	525	Calibration	-
664	6.6606	9936.83	0	?	0	525	Calibration	-
665	6.6706	9977.11	0	?	0	525	Calibration	-
666	6.6806	9983.69	0	?	0	525	Calibration	-
667	6.6906	9944.78	0	?	0	525	Calibration	-
668	6.7006	9911.38	0	?	0	525	Calibration	-
669	6.7107	9859.37	0	?	0	525	Calibration	-
670	6.7207	9923.28	0	?	0	525	Calibration	-
671	6.7307	9916.56	0	?	0	525	Calibration	-
672	6.7407	9893.15	0	?	0	525	Calibration	-
673	6.7507	9904.39	0	?	0	525	Calibration	-
674	6.7607	9923.11	0	?	0	525	Calibration	-
675	6.7707	9947.47	0	?	0	525	Calibration	-
676	6.7808	9942.68	0	?	0	525	Calibration	-
677	6.7908	9868.24	0	?	0	525	Calibration	-
678	6.8008	9926.66	0	?	0	525	Calibration	-
679	6.8108	10012	0	?	0	525	Calibration	-
680	6.8208	10062.2	0	?	0	525	Calibration	-
681	6.8308	9917.91	0	?	0	525	Calibration	-
682	6.8409	9846.87	0	?	0	525	Calibration	-
683	6.8509	9917.99	0	?	0	525	Calibration	-
684	6.8609	9957.43	0	?	0	525	Calibration	-
685	6.8709	9950.1	0	?	0	525	Calibration	-
686	6.8809	9991.87	0	?	0	525	Calibration	-
687	6.8909	9941.55	0	?	0	525	Calibration	-
688	6.901	9933.89	0	?	0	525	Calibration	-
689	6.911	9867.07	0	?	0	525	Calibration	-
690	6.921	9853.44	0	?	0	525	Calibration	-
691	6.931	9901.15	0	?	0	525	Calibration	-
692	6.941	9860.99	0	?	0	525	Calibration	-
693	6.951	9900.39	0	?	0	525	Calibration	-
694	6.9611	9858.51	0	?	0	525	Calibration	-
695	6.9711	9813.25	0	?	0	525	Calibration	-
696	6.9811	9871.09	0	?	0	525	Calibration	-
697	6.9911	9801.51	0	?	0	525	Calibration	-
698	7.0011	9875.38	0	?	0	525	Calibration	-
699	7.0111	9930.26	0	?	0	525	Calibration	-
700	7.0211	9882.24	0	?	0	525	Calibration	-
701	7.0312	9907.27	0	?	0	525	Calibration	-
702	7.0412	9887.75	0	?	0	525	Calibration	-
703	7.0512	9952.97	0	?	0	525	Calibration	-
704	7.0612	9951.43	0	?	0	525	Calibration	-
705	7.0712	9789.94	0	?	0	525	Calibration	-
706	7.0812	9835.66	0	?	0	525	Calibration	-
707	7.0913	9886.13	0	?	0	525	Calibration	-
708	7.1013	9890.02	0	?	0	525	Calibration	-
709	7.1113	9878.47	0	?	0	525	Calibration	-
710	7.1213	9824.15	0	?	0	525	Calibration	-
711	7.1313	9889.82	0	?	0	525	Calibration	-
712	7.1413	9950.32	0	?	0	525	Calibration	-
713	7.1514	9986.69	0	?	0	525	Calibration	-
714	7.1614	10060.6	0	?	0	525	Calibration	-
715	7.1714	10026.7	0	?	0	525	Calibration	-
716	7.1814	9964.63	0	?	0	525	Calibration	-
717	7.1914	9890.76	0	?	0	525	Calibration	-
718	7.2014	9850.05	0	?	0	525	Calibration	-
719	7.2114	9953.47	0	?	0	525	Calibration	-
720	7.2215	9968.03	0	?	0	525	Calibration	-
721	7.2315	9883.29	0	?	0	525	Calibration	-
722	7.2415	9906.55	0	?	0	525	Calibration	-
723	7.2515	9886.56	0	?	0	525	Calibration	-
724	7.2615	9881.27	0	?	0	525	Calibration	-
725	7.2715	9865.51	0	?	0	525	Calibration	-
726	7.2816	9919.06	0	?	0	525	Calibration	-
727	7.2916	9966.31	0	?	0	525	Calibration	-
728	7.3016	9933.15	0	?	0	525	Calibration	-
729	7.3116	9961.61	0	?	0	525	Calibration	-
730	7.3216	9973.62	0	?	0	525	Calibration	-
731	7.3316	10021.5	0	?	0	525	Calibration	-
732	7.3417	9894	0	?	0	525	Calibration	-
733	7.3517	9877.31	0	?	0	525	Calibration	-
734	7.3617	9870.35	0	?	0	525	Calibration	-
735	7.3717	9885.09	0	?	0	525	Calibration	-
736	7.3817	9940.47	0	?	0	525	Calibration	-
737	7.3917	10010.1	0	?	0	525	Calibration	-
738	7.4018	9984.8	0	?	0	525	Calibration	-
739	7.4118	9932.96	0	?	0	525	Calibration	-
740	7.4218	9911.84	0	?	0	525	Calibration	-
741	7.4318	9861.52	0	?	0	525	Calibration	-
742	7.4418	9965.54	0	?	0	525	Calibration	-
743	7.4518	10009.1	0	?	0	525	Calibration	-
744	7.4618	9933.8	0	?	0	525	Calibration	-
745	7.4719	9899.67	0	?	0	525	Calibration	-
746	7.4819	9893.77	0	?	0	525	Calibration	-
747	7.4919	9931.02	0	?	0	525	Calibration	-
748	7.5019	9948.97	0	?	0	525	Calibration	-
749	7.5119	9888.5	0	?	0	525	Calibration	-
750	7.5219	9922.97	0	?	0	525	Calibration	-
751	7.532	9883.17	0	?	0	525	Calibration	-
752	7.542	9822.11	0	?	0	525	Calibration	-
753	7.552	9810.47	0	?	0	525	Calibration	-
754	7.562	9789.21	0	?	0	525	Calibration	-
755	7.572	9807.55	0	?	0	525	Calibration	-
756	7.582	9811.74	0	?	0	525	Calibration	-
757	7.5921	9891.72	0	?	0	525	Calibration	-
758	7.6021	9925.82	0	?	0	525	Calibration	-
759	7.6121	9846.28	0	?	0	525	Calibration	-
760	7.6221	9860.69	0	?	0	525	Calibration	-
761	7.6321	9892.53	0	?	0	525	Calibration	-
762	7.6421	9894.55	0	?	0	525	Calibration	-
763	7.6521	9928.48	0	?	0	525	Calibration	-
764	7.6622	9842.49	0	?	0	525	Calibration	-
765	7.6722	9878.73	0	?	0	525	Calibration	-
766	7.6822	9862.85	0	?	0	525	Calibration	-
767	7.6922	9882.14	0	?	0	525	Calibration	-
768	7.7022	9810.55	0	?	0	525	Calibration	-
769	7.7122	9884.07	0	?	0	525	Calibration	-
770	7.7223	9966.28	0	?	0	525	Calibration	-
771	7.7323	9943.67	0	?	0	525	Calibration	-
772	7.7423	9866	0	?	0	525	Calibration	-
773	7.7523	9845.06	0	?	0	525	Calibration	-
774	7.7623	9872.54	0	?	0	525	Calibration	-
775	7.7723	9807.05	0	?	0	525	Calibration	-
776	7.7824	9733.91	0	?	0	525	Calibration	-
777	7.7924	9766.31	0	?	0	525	Calibration	-
778	7.8024	9774.94	0	?	0	525	Calibration	-
779	7.8124	9778.19	0	?	0	525	Calibration	-
780	7.8224	9769.64	0	?	0	525	Calibration	-
781	7.8324	9825.66	0	?	0	525	Calibration	-
782	7.8425	9787.75	0	?	0	525	Calibration	-
783	7.8525	9842.94	0	?	0	525	Calibration	-
784	7.8625	9884.62	0	?	0	525	Calibration	-
785	7.8725	9781.66	0	?	0	525	Calibration	-
786	7.8825	9773.04	0	?	0	525	Calibration	-
787	7.8925	9858.06	0	?	0	525	Calibration	-
788	7.9025	9873.06	0	?	0	525	Calibration	-
789	7.9126	9954.89	0	?	0	525	Calibration	-
790	7.9226	9869.86	0	?	0	525	Calibration	-
791	7.9326	9822.61	0	?	0	525	Calibration	-
792	7.9426	9701.35	0	?	0	525	Calibration	-
793	7.9526	9849.47	0	?	0	525	Calibration	-
794	7.9626	9799.98	0	?	0	525	Calibration	-
795	7.9727	9796.76	0	?	0	525	Calibration	-
796	7.9827	9840.05	0	?	0	525	Calibration	-
797	7.9927	9831.54	0	?	0	525	Calibration	-
798	8.0027	9856.5	0	?	0	525	Calibration	-
799	8.0127	9857.35	0	?	0	525	Calibration	-
800	8.0227	9901.09	0	?	0	525	Calibration	-
801	8.0328	9879.37	0	?	0	525	Calibration	-
802	8.0428	9899.63	0	?	0	525	Calibration	-
803	8.0528	9911.69	0	?	0	525	Calibration	-
804	8.0628	9932.75	0	?	0	525	Calibration	-
805	8.0728	9869.04	0	?	0	525	Calibration	-
806	8.0828	9799.29	0	?	0	525	Calibration	-
807	8.0928	9823.39	0	?	0	525	Calibration	-
808	8.1029	9851.45	0	?	0	525	Calibration	-
809	8.1129	9820.12	0	?	0	525	Calibration	-
810	8.1229	9826.42	0	?	0	525	Calibration	-
811	8.1329	9875.94	0	?	0	525	Calibration	-
812	8.1429	9913.14	0	?	0	525	Calibration	-
813	8.1529	9946.57	0	?	0	525	Calibration	-
814	8.163	9924.41	0	?	0	525	Calibration	-
815	8.173	9928.74	0	?	0	525	Calibration	-
816	8.183	9967.89	0	?	0	525	Calibration	-
817	8.193	10011.3	0	?	0	525	Calibration	-
818	8.203	9900.3	0	?	0	525	Calibration	-
819	8.213	9834.93	0	?	0	525	Calibration	-
820	8.2231	9818.11	0	?	0	525	Calibration	-
821	8.2331	9898.21	0	?	0	525	Calibration	-
822	8.2431	9910.18	0	?	0	525	Calibration	-
823	8.2531	9929.12	0	?	0	525	Calibration	-
824	8.2631	9918.51	0	?	0	525	Calibration	-
825	8.2731	9864.55	0	?	0	525	Calibration	-
826	8.2832	9834.18	0	?	0	525	Calibration	-
827	8.2932	9909.29	0	?	0	525	Calibration	-
828	8.3032	9969.97	0	?	0	525	Calibration	-
829	8.3132	9918.57	0	?	0	525	Calibration	-
830	8.3232	9889.41	0	?	0	525	Calibration	-
831	8.3332	9849.51	0	?	0	525	Calibration	-
832	8.3432	9760.7	0	?	0	525	Calibration	-
833	8.3533	9831.18	0	?	0	525	Calibration	-
834	8.3633	9792.4	0	?	0	525	Calibration	-
835	8.3733	9845.5	0	?	0	525	Calibration	-
836	8.3833	9905.78	0	?	0	525	Calibration	-
837	8.3933	9924.59	0	?	0	525	Calibration	-
838	8.4033	9849.63	0	?	0	525	Calibration	-
839	8.4134	9877.01	0	?	0	525	Calibration	-
840	8.4234	9868.42	0	?	0	525	Calibration	-
841	8.4334	9914.62	0	?	0	525	Calibration	-
842	8.4434	9861.43	0	?	0	525	Calibration	-
843	8.4534	9896.34	0	?	0	525	Calibration	-
844	8.4634	9892.84	0	?	0	525	Calibration	-
845	8.4735	9887.38	0	?	0	525	Calibration	-
846	8.4835	9863.81	0	?	0	525	Calibration	-
847	8.4935	9916.26	0	?	0	525	Calibration	-
848	8.5035	9846.24	0	?	0	525	Calibration	-
849	8.5135	9834.15	0	?	0	525	Calibration	-
850	8.5235	9856.78	0	?	0	525	Calibration	-
851	8.5335	9876.1	0	?	0	525	Calibration	-
852	8.5436	9863.27	0	?	0	525	Calibration	-
853	8.5536	9897.99	0	?	0	525	Calibration	-
854	8.5636	9978.62	0	?	0	525	Calibration	-
855	8.5736	9991.82	0	?	0	525	Calibration	-
856	8.5836	9990.29	0	?	0	525	Calibration	-
857	8.5936	9971.85	0	?	0	525	Calibration	-
858	8.6037	9857.31	0	?	0	525	Calibration	-
859	8.6137	9798.85	0	?	0	525	Calibration	-
860	8.6237	9864.18	0	?	0	525	Calibration	-
861	8.6337	9860.79	0	?	0	525	Calibration	-
862	8.6437	9850.48	0	?	0	525	Calibration	-
863	8.6537	9854.83	0	?	0	525	Calibration	-
864	8.6638	9907.24	0	?	0	525	Calibration	-
865	8.6738	9942.87	0	?	0	525	Calibration	-
866	8.6838	9872.33	0	?	0	525	Calibration	-
867	8.6938	9807.86	0	?	0	525	Calibration	-
868	8.7038	9828.18	0	?	0	525	Calibration	-
869	8.7138	9856.93	0	?	0	525	Calibration	-
870	8.7238	9892.56	0	?	0	525	Calibration	-
871	8.7339	9872.03	0	?	0	525	Calibration	-
872	8.7439	9747.37	0	?	0	525	Calibration	-
873	8.7539	9814.05	0	?	0	525	Calibration	-
874	8.7639	9872.38	0	?	0	525	Calibration	-
875	8.7739	9929.28	0	?	0	525	Calibration	-
876	8.7839	9928.59	0	?	0	525	Calibration	-
877	8.794	9888.78	0	?	0	525	Calibration	-
878	8.804	9919.65	0	?	0	525	Calibration	-
879	8.814	9841.2	0	?	0	525	Calibration	-
880	8.824	9825.14	0	?	0	525	Calibration	-
881	8.834	9893.8	0	?	0	525	Calibration	-
882	8.844	9864.05	0	?	0	525	Calibration	-
883	8.8541	9766.46	0	?	0	525	Calibration	-
884	8.8641	9759.84	0	?	0	525	Calibration	-
885	8.8741	9832.19	0	?	0	525	Calibration	-
886	8.8841	9803.25	0	?	0	525	Calibration	-
887	8.8941	9808.2	0	?	0	525	Calibration	-
888	8.9041	9827.49	0	?	0	525	Calibration	-
889	8.9142	9923.19	0	?	0	525	Calibration	-
890	8.9242	9980.09	0	?	0	525	Calibration	-
891	8.9342	9919.57	0	?	0	525	Calibration	-
892	8.9442	9905.69	0	?	0	525	Calibration	-
893	8.9542	9900.68	0	?	0	525	Calibration	-
894	8.9642	9910.49	0	?	0	525	Calibration	-
895	8.9742	9906.43	0	?	0	525	Calibration	-
896	8.9843	9967.66	0	?	0	525	Calibration	-
897	8.9943	9994.23	0	?	0	525	Calibration	-
898	9.0043	10014.7	0	?	0	525	Calibration	-
899	9.0143	10043.2	0	?	0	525	Calibration	-
900	9.0243	10010.2	0	?	0	525	Calibration	-
901	9.0343	9909.03	0	?	0	525	Calibration	-
902	9.0444	9898	0	?	0	525	Calibration	-
903	9.0544	9880.08	0	?	0	525	Calibration	-
904	9.0644	9902.74	0	?	0	525	Calibration	-
905	9.0744	9810.63	0	?	0	525	Calibration	-
906	9.0844	9784.89	0	?	0	525	Calibration	-
907	9.0944	9786.41	0	?	0	525	Calibration	-
908	9.1045	9799.99	0	?	0	525	Calibration	-
909	9.1145	9800.68	0	?	0	525	Calibration	-
910	9.1245	9791.35	0	?	0	525	Calibration	-
911	9.1345	9778.74	0	?	0	525	Calibration	-
912	9.1445	9749.74	0	?	0	525	Calibration	-
913	9.1545	9776.23	0	?	0	525	Calibration	-
914	9.1645	9849.06	0	?	0	525	Calibration	-
915	9.1746	9840.58	0	?	0	525	Calibration	-
916	9.1846	9914.95	0	?	0	525	Calibration	-
917	9.1946	9900.12	0	?	0	525	Calibration	-
918	9.2046	9916.43	0	?	0	525	Calibration	-
919	9.2146	9911.38	0	?	0	525	Calibration	-
920	9.2246	9929.52	0	?	0	525	Calibration	-
921	9.2347	9855.55	0	?	0	525	Calibration	-
922	9.2447	9822.13	0	?	0	525	Calibration	-
923	9.2547	9720.04	0	?	0	525	Calibration	-
924	9.2647	9786.99	0	?	0	525	Calibration	-
925	9.2747	9827.17	0	?	0	525	Calibration	-
926	9.2847	9834.79	0	?	0	525	Calibration	-
927	9.2948	9880.02	0	?	0	525	Calibration	-
928	9.3048	9885.91	0	?	0	525	Calibration	-
929	9.3148	9913.45	0	?	0	525	Calibration	-
930	9.3248	9901.87	0	?	0	525	Calibration	-
931	9.3348	9842.35	0	?	0	525	Calibration	-
932	9.3448	9850.78	0	?	0	525	Calibration	-
933	9.3549	9794.1	0	?	0	525	Calibration	-
934	9.3649	9816.7	0	?	0	525	Calibration	-
935	9.3749	9875.37	0	?	0	525	Calibration	-
936	9.3849	9899.19	0	?	0	525	Calibration	-
937	9.3949	9930.84	0	?	0	525	Calibration	-
938	9.4049	9871.48	0	?	0	525	Calibration	-
939	9.4149	9871.75	0	?	0	525	Calibration	-
940	9.425	9875.06	0	?	0	525	Calibration	-
941	9.435	9880.89	0	?	0	525	Calibration	-
942	9.445	9867.61	0	?	0	525	Calibration	-
943	9.455	9859.42	0	?	0	525	Calibration	-
944	9.465	9832.46	0	?	0	525	Calibration	-
945	9.475	9795.33	0	?	0	525	Calibration	-
946	9.4851	9750.04	0	?	0	525	Calibration	-
947	9.4951	9762.29	0	?	0	525	Calibration	-
948	9.5051	9840.74	0	?	0	525	Calibration	-
949	9.5151	9917.24	0	?	0	525	Calibration	-
950	9.5251	9887.65	0	?	0	525	Calibration	-
951	9.5351	9889.26	0	?	0	525	Calibration	-
952	9.5452	9877.2	0	?	0	525	Calibration	-
953	9.5552	9880.25	0	?	0	525	Calibration	-
954	9.5652	9878.65	0	?	0	525	Calibration	-
955	9.5752	9832.39	0	?	0	525	Calibration	-
956	9.5852	9854.57	0	?	0	525	Calibration	-
957	9.5952	9867.46	0	?	0	525	Calibration	-
958	9.6052	9922.14	0	?	0	525	Calibration	-
959	9.6153	9945.54	0	?	0	525	Calibration	-
960	9.6253	9959.43	0	?	0	525	Calibration	-
961	9.6353	9898.47	0	?	0	525	Calibration	-
962	9.6453	9880.63	0	?	0	525	Calibration	-
963	9.6553	9892.16	0	?	0	525	Calibration	-
964	9.6653	9857.97	0	?	0	525	Calibration	-
965	9.6754	9856.04	0	?	0	525	Calibration	-
966	9.6854	9862.97	0	?	0	525	Calibration	-
967	9.6954	9861.58	0	?	0	525	Calibration	-
968	9.7054	9870.13	0	?	0	525	Calibration	-
969	9.7154	9860.82	0	?	0	525	Calibration	-
970	9.7254	9827.36	0	?	0	525	Calibration	-
971	9.7355	9856.77	0	?	0	525	Calibration	-
972	9.7455	9801.89	0	?	0	525	Calibration	-
973	9.7555	9885.85	0	?	0	525	Calibration	-
974	9.7655	9893.77	0	?	0	525	Calibration	-
975	9.7755	9840.1	0	?	0	525	Calibration	-
976	9.7855	9824.74	0	?	0	525	Calibration	-
977	9.7956	9874.24	0	?	0	525	Calibration	-
978	9.8056	9873.12	0	?	0	525	Calibration	-
979	9.8156	9922.9	0	?	0	525	Calibration	-
980	9.8256	9925.72	0	?	0	525	Calibration	-
981	9.8356	9916.91	0	?	0	525	Calibration	-
982	9.8456	9845.41	0	?	0	525	Calibration	-
983	9.8556	9822.87	0	?	0	525	Calibration	-
984	9.8657	9759.85	0	?	0	525	Calibration	-
985	9.8757	9748.98	0	?	0	525	Calibration	-
986	9.8857	9734	0	?	0	525	Calibration	-
987	9.8957	9750.06	0	?	0	525	Calibration	-
988	9.9057	9820.75	0	?	0	525	Calibration	-
989	9.9157	9850.22	0	?	0	525	Calibration	-
990	9.9258	9867.89	0	?	0	525	Calibration	-
991	9.9358	9855.68	0	?	0	525	Calibration	-
992	9.9458	9850.73	0	?	0	525	Calibration	-
993	9.9558	9743.08	0	?	0	525	Calibration	-
994	9.9658	9784.91	0	?	0	525	Calibration	-
995	9.9758	9852.77	0	?	0	525	Calibration	-
996	9.9859	9827.16	0	?	0	525	Calibration	-
997	9.9959	9842.86	0	?	0	525	Calibration	-
998	10.0059	9929.78	0	?	0	525	Calibration	-
999	10.0159	9917.26	0	?	0	525	Calibration	-
1000	10.0259	9873.05	0	?	0	525	Calibration	-
1001	10.0359	9889.19	0	?	0	525	Calibration	-
1002	10.0459	9843.83	0	?	0	525	Calibration	-
1003	10.056	9856.43	0	?	0	525	Calibration	-
1004	10.066	9852.63	0	?	0	525	Calibration	-
1005	10.076	9871.68	0	?	0	525	Calibration	-
1006	10.086	9847.23	0	?	0	525	Calibration	-
1007	10.096	9820.09	0	?	0	525	Calibration	-
1008	10.106	9792.4	0	?	0	525	Calibration	-
1009	10.1161	9792.53	0	?	0	525	Calibration	-
1010	10.1261	9722.4	0	?	0	525	Calibration	-
1011	10.1361	9778.75	0	?	0	525	Calibration	-
1012	10.1461	9840.89	0	?	0	525	Calibration	-
1013	10.1561	9921.01	0	?	0	525	Calibration	-
1014	10.1661	9929.5	0	?	0	525	Calibration	-
1015	10.1762	9937.12	0	?	0	525	Calibration	-
1016	10.1862	9945.7	0	?	0	525	Calibration	-
1017	10.1962	9805.71	0	?	0	525	Calibration	-
1018	10.2062	9751.5	0	?	0	525	Calibration	-
1019	10.2162	9800.07	0	?	0	525	Calibration	-
1020	10.2262	9855.74	0	?	0	525	Calibration	-
1021	10.2363	9832.6	0	?	0	525	Calibration	-
1022	10.2463	9862.25	0	?	0	525	Calibration	-
1023	10.2563	9989.47	0	?	0	525	Calibration	-
1024	10.2663	9951.45	0	?	0	525	Calibration	-
1025	10.2763	9911.56	0	?	0	525	Calibration	-
1026	10.2863	9910.04	0	?	0	525	Calibration	-
1027	10.2963	9904.31	0	?	0	525	Calibration	-
1028	10.3064	9854.3	0	?	0	525	Calibration	-
1029	10.3164	9845.51	0	?	0	525	Calibration	-
1030	10.3264	9819.5	0	?	0	525	Calibration	-
1031	10.3364	9869.05	0	?	0	525	Calibration	-
1032	10.3464	9897.99	0	?	0	525	Calibration	-
1033	10.3564	9892.6	0	?	0	525	Calibration	-
1034	10.3665	9879.99	0	?	0	525	Calibration	-
1035	10.3765	9875.43	0	?	0	525	Calibration	-
1036	10.3865	9888.95	0	?	0	525	Calibration	-
1037	10.3965	9881.13	0	?	0	525	Calibration	-
1038	10.4065	9892.12	0	?	0	525	Calibration	-
1039	10.4165	9867.43	0	?	0	525	Calibration	-
1040	10.4266	9836.39	0	?	0	525	Calibration	-
1041	10.4366	9749.05	0	?	0	525	Calibration	-
1042	10.4466	9840.23	0	?	0	525	Calibration	-
1043	10.4566	9721.43	0	?	0	525	Calibration	-
1044	10.4666	9687.16	0	?	0	525	Calibration	-
1045	10.4766	9671.74	0	?	0	525	Calibration	-
1046	10.4866	9719.41	0	?	0	525	Calibration	-
1047	10.4967	9772.88	0	?	0	525	Calibration	-
1048	10.5067	9855.52	0	?	0	525	Calibration	-
1049	10.5167	9814.97	0	?	0	525	Calibration	-
1050	10.5267	9762.96	0	?	0	525	Calibration	-
1051	10.5367	9785.5	0	?	0	525	Calibration	-
1052	10.5467	9746.71	0	?	0	525	Calibration	-
1053	10.5568	9790.32	0	?	0	525	Calibration	-
1054	10.5668	9724.21	0	?	0	525	Calibration	-
1055	10.5768	9727.85	0	?	0	525	Calibration	-
1056	10.5868	9795.69	0	?	0	525	Calibration	-
1057	10.5968	9854.77	0	?	0	525	Calibration	-
1058	10.6068	9860	0	?	0	525	Calibration	-
1059	10.6169	9825.24	0	?	0	525	Calibration	-
1060	10.6269	9771.43	0	?	0	525	Calibration	-
1061	10.6369	9723.14	0	?	0	525	Calibration	-
1062	10.6469	9669.66	0	?	0	525	Calibration	-
1063	10.6569	9829.04	0	?	0	525	Calibration	-
1064	10.6669	9838.21	0	?	0	525	Calibration	-
1065	10.677	9845.22	0	?	0	525	Calibration	-
1066	10.687	9830.33	0	?	0	525	Calibration	-
1067	10.697	9836.95	0	?	0	525	Calibration	-
1068	10.707	9775.86	0	?	0	525	Calibration	-
1069	10.717	9767.35	0	?	0	525	Calibration	-
1070	10.727	9733.18	0	?	0	525	Calibration	-
1071	10.737	9745.4	0	?	0	525	Calibration	-
1072	10.7471	9752.12	0	?	0	525	Calibration	-
1073	10.7571	9719.43	0	?	0	525	Calibration	-
1074	10.7671	9774.59	0	?	0	525	Calibration	-
1075	10.7771	9794.34	0	?	0	525	Calibration	-
1076	10.7871	9802.16	0	?	0	525	Calibration	-
1077	10.7971	9782.48	0	?	0	525	Calibration	-
1078	10.8072	9744.23	0	?	0	525	Calibration	-
1079	10.8172	9803.52	0	?	0	525	Calibration	-
1080	10.8272	9812.53	0	?	0	525	Calibration	-
1081	10.8372	9742.15	0	?	0	525	Calibration	-
1082	10.8472	9714.49	0	?	0	525	Calibration	-
1083	10.8572	9780.27	0	?	0	525	Calibration	-
1084	10.8673	9765.05	0	?	0	525	Calibration	-
1085	10.8773	9793.43	0	?	0	525	Calibration	-
1086	10.8873	9839.48	0	?	0	525	Calibration	-
1087	10.8973	9804.13	0	?	0	525	Calibration	-
1088	10.9073	9793.4	0	?	0	525	Calibration	-
1089	10.9173	9738.86	0	?	0	525	Calibration	-
1090	10.9273	9753.82	0	?	0	525	Calibration	-
1091	10.9374	9841.19	0	?	0	525	Calibration	-
1092	10.9474	9785.23	0	?	0	525	Calibration	-
1093	10.9574	9785.16	0	?	0	525	Calibration	-
1094	10.9674	9800.6	0	?	0	525	Calibration	-
1095	10.9774	9796.7	0	?	0	525	Calibration	-
1096	10.9874	9725.95	0	?	0	525	Calibration	-
1097	10.9975	9818.3	0	?	0	525	Calibration	-
1098	11.0075	9879.16	0	?	0	525	Calibration	-
1099	11.0175	9873.72	0	?	0	525	Calibration	-
1100	11.0275	9775.25	0	?	0	525	Calibration	-
1101	11.0375	9711.84	0	?	0	525	Calibration	-
1102	11.0475	9813.87	0	?	0	525	Calibration	-
1103	11.0576	9794.37	0	?	0	525	Calibration	-
1104	11.0676	9746.61	0	?	0	525	Calibration	-
1105	11.0776	9788.55	0	?	0	525	Calibration	-
1106	11.0876	9669.22	0	?	0	525	Calibration	-
1107	11.0976	9664.51	0	?	0	525	Calibration	-
1108	11.1076	9629.29	0	?	0	525	Calibration	-
1109	11.1177	9641.52	0	?	0	525	Calibration	-
1110	11.1277	9688.67	0	?	0	525	Calibration	-
1111	11.1377	9696.56	0	?	0	525	Calibration	-
1112	11.1477	9671.65	0	?	0	525	Calibration	-
1113	11.1577	9592.49	0	?	0	525	Calibration	-
1114	11.1677	9623.29	0	?	0	525	Calibration	-
1115	11.1777	9648.54	0	?	0	525	Calibration	-
1116	11.1878	9564.63	0	?	0	525	Calibration	-
1117	11.1978	9628.79	0	?	0	525	Calibration	-
1118	11.2078	9724.19	0	?	0	525	Calibration	-
1119	11.2178	9774.55	0	?	0	525	Calibration	-
1120	11.2278	9782.14	0	?	0	525	Calibration	-
1121	11.2378	9764.69	0	?	0	525	Calibration	-
1122	11.2479	9689.21	0	?	0	525	Calibration	-
1123	11.2579	9761.54	0	?	0	525	Calibration	-
1124	11.2679	9752	0	?	0	525	Calibration	-
1125	11.2779	9804.04	0	?	0	525	Calibration	-
1126	11.2879	9722.84	0	?	0	525	Calibration	-
1127	11.2979	9669.27	0	?	0	525	Calibration	-
1128	11.308	9628.05	0	?	0	525	Calibration	-
1129	11.318	9624.22	0	?	0	525	Calibration	-
1130	11.328	9684.88	0	?	0	525	Calibration	-
1131	11.338	9713.22	0	?	0	525	Calibration	-
1132	11.348	9742.53	0	?	0	525	Calibration	-
1133	11.358	9774.04	0	?	0	525	Calibration	-
1134	11.368	9842.18	0	?	0	525	Calibration	-
1135	11.3781	9823.47	0	?	0	525	Calibration	-
1136	11.3881	9747.57	0	?	0	525	Calibration	-
1137	11.3981	9733.87	0	?	0	525	Calibration	-
1138	11.4081	9684.08	0	?	0	525	Calibration	-
1139	11.4181	9694.83	0	?	0	525	Calibration	-
1140	11.4281	9742.26	0	?	0	525	Calibration	-
1141	11.4382	9799.57	0	?	0	525	Calibration	-
1142	11.4482	9801.09	0	?	0	525	Calibration	-
1143	11.4582	9831.57	0	?	0	525	Calibration	-
1144	11.4682	9849.88	0	?	0	525	Calibration	-
1145	11.4782	9753.05	0	?	0	525	Calibration	-
1146	11.4882	9798.94	0	?	0	525	Calibration	-
1147	11.4983	9793.99	0	?	0	525	Calibration	-
1148	11.5083	9844.8	0	?	0	525	Calibration	-
1149	11.5183	9804.35	0	?	0	525	Calibration	-
1150	11.5283	9824.17	0	?	0	525	Calibration	-
1151	11.5383	9737.94	0	?	0	525	Calibration	-
1152	11.5483	9769.47	0	?	0	525	Calibration	-
1153	11.5583	9800.77	0	?	0	525	Calibration	-
1154	11.5684	9839.83	0	?	0	525	Calibration	-
1155	11.5784	9810.19	0	?	0	525	Calibration	-
1156	11.5884	9743.02	0	?	0	525	Calibration	-
1157	11.5984	9703.07	0	?	0	525	Calibration	-
1158	11.6084	9748.06	0	?	0	525	Calibration	-
1159	11.6184	9781.84	0	?	0	525	Calibration	-
1160	11.6285	9848.83	0	?	0	525	Calibration	-
1161	11.6385	9832.25	0	?	0	525	Calibration	-
1162	11.6485	9805.04	0	?	0	525	Calibration	-
1163	11.6585	9778.23	0	?	0	525	Calibration	-
1164	11.6685	9740.15	0	?	0	525	Calibration	-
1165	11.6785	9765.67	0	?	0	525	Calibration	-
1166	11.6886	9853.64	0	?	0	525	Calibration	-
1167	11.6986	9921.29	0	?	0	525	Calibration	-
1168	11.7086	9956.39	0	?	0	525	Calibration	-
1169	11.7186	9915.68	0	?	0	525	Calibration	-
1170	11.7286	9952.53	0	?	0	525	Calibration	-
1171	11.7386	9866.16	0	?	0	525	Calibration	-
1172	11.7487	9853.52	0	?	0	525	Calibration	-
1173	11.7587	9857.3	0	?	0	525	Calibration	-
1174	11.7687	9820.45	0	?	0	525	Calibration	-
1175	11.7787	9822.6	0	?	0	525	Calibration	-
1176	11.7887	9884.71	0	?	0	525	Calibration	-
1177	11.7987	9871.92	0	?	0	525	Calibration	-
1178	11.8087	9855.96	0	?	0	525	Calibration	-
1179	11.8188	9796.99	0	?	0	525	Calibration	-
1180	11.8288	9882.35	0	?	0	525	Calibration	-
1181	11.8388	9879.66	0	?	0	525	Calibration	-
1182	11.8488	9840.02	0	?	0	525	Calibration	-
1183	11.8588	9806.35	0	?	0	525	Calibration	-
1184	11.8688	9836.43	0	?	0	525	Calibration	-
1185	11.8789	9847.59	0	?	0	525	Calibration	-
1186	11.8889	9879.87	0	?	0	525	Calibration	-
1187	11.8989	9789.29	0	?	0	525	Calibration	-
1188	11.9089	9794.64	0	?	0	525	Calibration	-
1189	11.9189	9821.92	0	?	0	525	Calibration	-
1190	11.9289	9763.54	0	?	0	525	Calibration	-
1191	11.939	9765.82	0	?	0	525	Calibration	-
1192	11.949	9758.36	0	?	0	525	Calibration	-
1193	11.959	9752.1	0	?	0	525	Calibration	-
1194	11.969	9697.42	0	?	0	525	Calibration	-
1195	11.979	9739.52	0	?	0	525	Calibration	-
1196	11.989	9813.44	0	?	0	525	Calibration	-
1197	11.999	9823.21	0	?	0	525	Calibration	-
1198	12.0091	9905.08	0	?	0	525	Calibration	-
1199	12.0191	9909.32	0	?	0	525	Calibration	-
1200	12.0291	9919.77	0	?	0	525	Calibration	-
1201	12.0391	9939.27	0	?	0	525	Calibration	-
1202	12.0491	9898.09	0	?	0	525	Calibration	-
1203	12.0591	9874.66	0	?	0	525	Calibration	-
1204	12.0692	9868.8	0	?	0	525	Calibration	-
1205	12.0792	9830.92	0	?	0	525	Calibration	-
1206	12.0892	9808.94	0	?	0	525	Calibration	-
1207	12.0992	9805.07	0	?	0	525	Calibration	-
1208	12.1092	9783.59	0	?	0	525	Calibration	-
1209	12.1192	9789.77	0	?	0	525	Calibration	-
1210	12.1293	9771.46	0	?	0	525	Calibration	-
1211	12.1393	9834.6	0	?	0	525	Calibration	-
1212	12.1493	9836.38	0	?	0	525	Calibration	-
1213	12.1593	9908.9	0	?	0	525	Calibration	-
1214	12.1693	9855.78	0	?	0	525	Calibration	-
1215	12.1793	9815.65	0	?	0	525	Calibration	-
1216	12.1894	9755.99	0	?	0	525	Calibration	-
1217	12.1994	9847.02	0	?	0	525	Calibration	-
1218	12.2094	9840.21	0	?	0	525	Calibration	-
1219	12.2194	9841.79	0	?	0	525	Calibration	-
1220	12.2294	9860.07	0	?	0	525	Calibration	-
1221	12.2394	9853.08	0	?	0	525	Calibration	-
1222	12.2494	9817.96	0	?	0	525	Calibration	-
1223	12.2595	9797.26	0	?	0	525	Calibration	-
1224	12.2695	9823.19	0	?	0	525	Calibration	-
1225	12.2795	9859.68	0	?	0	525	Calibration	-
1226	12.2895	9917.7	0	?	0	525	Calibration	-
1227	12.2995	9957.19	0	?	0	525	Calibration	-
1228	12.3095	9886.56	0	?	0	525	Calibration	-
1229	12.3196	9891.45	0	?	0	525	Calibration	-
1230	12.3296	9876.66	0	?	0	525	Calibration	-
1231	12.3396	9901.75	0	?	0	525	Calibration	-
1232	12.3496	9916.59	0	?	0	525	Calibration	-
1233	12.3596	9877.11	0	?	0	525	Calibration	-
1234	12.3696	9814.33	0	?	0	525	Calibration	-
1235	12.3797	9817.74	0	?	0	525	Calibration	-
1236	12.3897	9885.27	0	?	0	525	Calibration	-
1237	12.3997	9868	0	?	0	525	Calibration	-
1238	12.4097	9872.44	0	?	0	525	Calibration	-
1239	12.4197	9856.55	0	?	0	525	Calibration	-
1240	12.4297	9850.92	0	?	0	525	Calibration	-
1241	12.4397	9786.93	0	?	0	525	Calibration	-
1242	12.4498	9839.15	0	?	0	525	Calibration	-
1243	12.4598	9819.29	0	?	0	525	Calibration	-
1244	12.4698	9733.43	0	?	0	525	Calibration	-
1245	12.4798	9756.71	0	?	0	525	Calibration	-
1246	12.4898	9794.41	0	?	0	525	Calibration	-
1247	12.4998	9855.39	0	?	0	525	Calibration	-
1248	12.5099	9863.48	0	?	0	525	Calibration	-
1249	12.5199	9778.23	0	?	0	525	Calibration	-
1250	12.5299	9766.33	0	?	0	525	Calibration	-
1251	12.5399	9843.86	0	?	0	525	Calibration	-
1252	12.5499	9825.68	0	?	0	525	Calibration	-
1253	12.5599	9821.53	0	?	0	525	Calibration	-
1254	12.57	9792.98	0	?	0	525	Calibration	-
1255	12.58	9759.51	0	?	0	525	Calibration	-
1256	12.59	9784.87	0	?	0	525	Calibration	-
1257	12.6	9860.03	0	?	0	525	Calibration	-
1258	12.61	9840.45	0	?	0	525	Calibration	-
1259	12.62	9840.89	0	?	0	525	Calibration	-
1260	12.6301	9908.92	0	?	0	525	Calibration	-
1261	12.6401	9974	0	?	0	525	Calibration	-
1262	12.6501	9979.93	0	?	0	525	Calibration	-
1263	12.6601	9949.95	0	?	0	525	Calibration	-
1264	12.6701	9857.12	0	?	0	525	Calibration	-
1265	12.6801	9863.58	0	?	0	525	Calibration	-
1266	12.6901	9893.65	0	?	0	525	Calibration	-
1267	12.7002	9859.87	0	?	0	525	Calibration	-
1268	12.7102	9810.86	0	?	0	525	Calibration	-
1269	12.7202	9821.18	0	?	0	525	Calibration	-
1270	12.7302	9829.83	0	?	0	525	Calibration	-
1271	12.7402	9733.64	0	?	0	525	Calibration	-
1272	12.7502	9744.21	0	?	0	525	Calibration	-
1273	12.7603	9810.93	0	?	0	525	Calibration	-
1274	12.7703	9784.27	0	?	0	525	Calibration	-
1275	12.7803	9738.85	0	?	0	525	Calibration	-
1276	12.7903	9732.49	0	?	0	525	Calibration	-
1277	12.8003	9798.05	0	?	0	525	Calibration	-
1278	12.8103	9814.65	0	?	0	525	Calibration	-
1279	12.8204	9765.26	0	?	0	525	Calibration	-
1280	12.8304	9842.82	0	?	0	525	Calibration	-
1281	12.8404	9878.6	0	?	0	525	Calibration	-
1282	12.8504	9842.5	0	?	0	525	Calibration	-
1283	12.8604	9741.59	0	?	0	525	Calibration	-
1284	12.8704	9718.58	0	?	0	525	Calibration	-
1285	12.8804	9722.74	0	?	0	525	Calibration	-
1286	12.8905	9721.77	0	?	0	525	Calibration	-
1287	12.9005	9723.13	0	?	0	525	Calibration	-
1288	12.9105	9788.76	0	?	0	525	Calibration	-
1289	12.9205	9775.2	0	?	0	525	Calibration	-
1290	12.9305	9719.62	0	?	0	525	Calibration	-
1291	12.9405	9755.86	0	?	0	525	Calibration	-
1292	12.9506	9757.12	0	?	0	525	Calibration	-
1293	12.9606	9818.38	0	?	0	525	Calibration	-
1294	12.9706	9815.79	0	?	0	525	Calibration	-
1295	12.9806	9779.99	0	?	0	525	Calibration	-
1296	12.9906	9785.09	0	?	0	525	Calibration	-
1297	13.0006	9690.62	0	?	0	525	Calibration	-
1298	13.0107	9716.89	0	?	0	525	Calibration	-
1299	13.0207	9759.75	0	?	0	525	Calibration	-
1300	13.0307	9806.7	0	?	0	525	Calibration	-
1301	13.0407	9793.97	0	?	0	525	Calibration	-
1302	13.0507	9873.16	0	?	0	525	Calibration	-
1303	13.0607	9870.16	0	?	0	525	Calibration	-
1304	13.0708	9889.35	0	?	0	525	Calibration	-
1305	13.0808	9877.64	0	?	0	525	Calibration	-
1306	13.0908	9848.8	0	?	0	525	Calibration	-
1307	13.1008	9867.11	0	?	0	525	Calibration	-
1308	13.1108	9831.18	0	?	0	525	Calibration	-
1309	13.1208	9832.16	0	?	0	525	Calibration	-
1310	13.1308	9763.16	0	?	0	525	Calibration	-
1311	13.1409	9710.44	0	?	0	525	Calibration	-
1312	13.1509	9714.92	0	?	0	525	Calibration	-
1313	13.1609	9757.88	0	?	0	525	Calibration	-
1314	13.1709	9839.24	0	?	0	525	Calibration	-
1315	13.1809	9844.2	0	?	0	525	Calibration	-
1316	13.1909	9738.24	0	?	0	525	Calibration	-
1317	13.201	9788.56	0	?	0	525	Calibration	-
1318	13.211	9792.05	0	?	0	525	Calibration	-
1319	13.221	9792.86	0	?	0	525	Calibration	-
1320	13.231	9799.97	0	?	0	525	Calibration	-
1321	13.241	9801.41	0	?	0	525	Calibration	-
1322	13.251	9817.59	0	?	0	525	Calibration	-
1323	13.2611	9797	0	?	0	525	Calibration	-
1324	13.2711	9712.83	0	?	0	525	Calibration	-
1325	13.2811	9672.44	0	?	0	525	Calibration	-
1326	13.2911	9724.69	0	?	0	525	Calibration	-
1327	13.3011	9751.13	0	?	0	525	Calibration	-
1328	13.3111	9769.08	0	?	0	525	Calibration	-
1329	13.3211	9842.8	0	?	0	525	Calibration	-
1330	13.3312	9835.09	0	?	0	525	Calibration	-
1331	13.3412	9826.38	0	?	0	525	Calibration	-
1332	13.3512	9789.92	0	?	0	525	Calibration	-
1333	13.3612	9847.08	0	?	0	525	Calibration	-
1334	13.3712	9843.34	0	?	0	525	Calibration	-
1335	13.3812	9794.35	0	?	0	525	Calibration	-
1336	13.3913	9806.67	0	?	0	525	Calibration	-
1337	13.4013	9833.3	0	?	0	525	Calibration	-
1338	13.4113	9842.34	0	?	0	525	Calibration	-
1339	13.4213	9827.53	0	?	0	525	Calibration	-
1340	13.4313	9825.4	0	?	0	525	Calibration	-
1341	13.4413	9792.27	0	?	0	525	Calibration	-
1342	13.4514	9844.68	0	?	0	525	Calibration	-
1343	13.4614	9780.2	0	?	0	525	Calibration	-
1344	13.4714	9714.66	0	?	0	525	Calibration	-
1345	13.4814	9740.26	0	?	0	525	Calibration	-
1346	13.4914	9803.84	0	?	0	525	Calibration	-
1347	13.5014	9818.96	0	?	0	525	Calibration	-
1348	13.5115	9780.95	0	?	0	525	Calibration	-
1349	13.5215	9876.43	0	?	0	525	Calibration	-
1350	13.5315	9861.88	0	?	0	525	Calibration	-
1351	13.5415	9882.06	0	?	0	525	Calibration	-
1352	13.5515	9863.77	0	?	0	525	Calibration	-
1353	13.5615	9750.22	0	?	0	525	Calibration	-
1354	13.5715	9790.35	0	?	0	525	Calibration	-
1355	13.5816	9832.68	0	?	0	525	Calibration	-
1356	13.5916	9828.26	0	?	0	525	Calibration	-
1357	13.6016	9841.71	0	?	0	525	Calibration	-
1358	13.6116	9901.51	0	?	0	525	Calibration	-
1359	13.6216	9870.8	0	?	0	525	Calibration	-
1360	13.6316	9833.11	0	?	0	525	Calibration	-
1361	13.6417	9811.86	0	?	0	525	Calibration	-
1362	13.6517	9805.92	0	?	0	525	Calibration	-
1363	13.6617	9796.68	0	?	0	525	Calibration	-
1364	13.6717	9810.64	0	?	0	525	Calibration	-
1365	13.6817	9817.9	0	?	0	525	Calibration	-
1366	13.6917	9858.68	0	?	0	525	Calibration	-
1367	13.7018	9812.29	0	?	0	525	Calibration	-
1368	13.7118	9763.21	0	?	0	525	Calibration	-
1369	13.7218	9756.41	0	?	0	525	Calibration	-
1370	13.7318	9737.27	0	?	0	525	Calibration	-
1371	13.7418	9758.99	0	?	0	525	Calibration	-
1372	13.7518	9771.58	0	?	0	525	Calibration	-
1373	13.7618	9756.14	0	?	0	525	Calibration	-
1374	13.7719	9770.82	0	?	0	525	Calibration	-
1375	13.7819	9695.78	0	?	0	525	Calibration	-
1376	13.7919	9725.7	0	?	0	525	Calibration	-
1377	13.8019	9738.06	0	?	0	525	Calibration	-
1378	13.8119	9749.55	0	?	0	525	Calibration	-
1379	13.8219	9794.54	0	?	0	525	Calibration	-
1380	13.832	9793.78	0	?	0	525	Calibration	-
1381	13.842	9782.54	0	?	0	525	Calibration	-
1382	13.852	9787.83	0	?	0	525	Calibration	-
1383	13.862	9704.18	0	?	0	525	Calibration	-
1384	13.872	9736	0	?	0	525	Calibration	-
1385	13.882	9706.38	0	?	0	525	Calibration	-
1386	13.8921	9706.79	0	?	0	525	Calibration	-
1387	13.9021	9780.01	0	?	0	525	Calibration	-
1388	13.9121	9774.26	0	?	0	525	Calibration	-
1389	13.9221	9749.39	0	?	0	525	Calibration	-
1390	13.9321	9753.63	0	?	0	525	Calibration	-
1391	13.9421	9713.39	0	?	0	525	Calibration	-
1392	13.9522	9729.51	0	?	0	525	Calibration	-
1393	13.9622	9770.7	0	?	0	525	Calibration	-
1394	13.9722	9719.69	0	?	0	525	Calibration	-
1395	13.9822	9644.07	0	?	0	525	Calibration	-
1396	13.9922	9705.98	0	?	0	525	Calibration	-
1397	14.0022	9727.47	0	?	0	525	Calibration	-
1398	14.0122	9722.29	0	?	0	525	Calibration	-
1399	14.0223	9750.43	0	?	0	525	Calibration	-
1400	14.0323	9717.04	0	?	0	525	Calibration	-
1401	14.0423	9785.93	0	?	0	525	Calibration	-
1402	14.0523	9836.76	0	?	0	525	Calibration	-
1403	14.0623	9833.28	0	?	0	525	Calibration	-
1404	14.0723	9847.77	0	?	0	525	Calibration	-
1405	14.0824	9795.54	0	?	0	525	Calibration	-
1406	14.0924	9761.05	0	?	0	525	Calibration	-
1407	14.1024	9732.66	0	?	0	525	Calibration	-
1408	14.1124	9748.79	0	?	0	525	Calibration	-
1409	14.1224	9748.75	0	?	0	525	Calibration	-
1410	14.1324	9747.52	0	?	0	525	Calibration	-
1411	14.1425	9737.82	0	?	0	525	Calibration	-
1412	14.1525	9734.53	0	?	0	525	Calibration	-
1413	14.1625	9751.48	0	?	0	525	Calibration	-
1414	14.1725	9706.7	0	?	0	525	Calibration	-
1415	14.1825	9676.44	0	?	0	525	Calibration	-
1416	14.1925	9652.35	0	?	0	525	Calibration	-
1417	14.2025	9652.83	0	?	0	525	Calibration	-
1418	14.2126	9723.69	0	?	0	525	Calibration	-
1419	14.2226	9686.56	0	?	0	525	Calibration	-
1420	14.2326	9647.56	0	?	0	525	Calibration	-
1421	14.2426	9679.06	0	?	0	525	Calibration	-
1422	14.2526	9708.27	0	?	0	525	Calibration	-
1423	14.2626	9729.43	0	?	0	525	Calibration	-
1424	14.2727	9705.65	0	?	0	525	Calibration	-
1425	14.2827	9689.5	0	?	0	525	Calibration	-
1426	14.2927	9619.23	0	?	0	525	Calibration	-
1427	14.3027	9671.55	0	?	0	525	Calibration	-
1428	14.3127	9661.72	0	?	0	525	Calibration	-
1429	14.3227	9696.18	0	?	0	525	Calibration	-
1430	14.3328	9752.89	0	?	0	525	Calibration	-
1431	14.3428	9715.24	0	?	0	525	Calibration	-
1432	14.3528	9747.54	0	?	0	525	Calibration	-
1433	14.3628	9735.2	0	?	0	525	Calibration	-
1434	14.3728	9740.36	0	?	0	525	Calibration	-
1435	14.3828	9709.35	0	?	0	525	Calibration	-
1436	14.3928	9697.8	0	?	0	525	Calibration	-
1437	14.4029	9670.86	0	?	0	525	Calibration	-
1438	14.4129	9617.22	0	?	0	525	Calibration	-
1439	14.4229	9629.22	0	?	0	525	Calibration	-
1440	14.4329	9654.42	0	?	0	525	Calibration	-
1441	14.4429	9651.84	0	?	0	525	Calibration	-
1442	14.4529	9638.75	0	?	0	525	Calibration	-
1443	14.463	9635.12	0	?	0	525	Calibration	-
1444	14.473	9659.14	0	?	0	525	Calibration	-
1445	14.483	9716.52	0	?	0	525	Calibration	-
1446	14.493	9744.64	0	?	0	525	Calibration	-
1447	14.503	9838.45	0	?	0	525	Calibration	-
1448	14.513	9813.81	0	?	0	525	Calibration	-
1449	14.5231	9841.61	0	?	0	525	Calibration	-
1450	14.5331	9811.98	0	?	0	525	Calibration	-
1451	14.5431	9743.49	0	?	0	525	Calibration	-
1452	14.5531	9782.62	0	?	0	525	Calibration	-
1453	14.5631	9757.22	0	?	0	525	Calibration	-
1454	14.5731	9738.67	0	?	0	525	Calibration	-
1455	14.5832	9685	0	?	0	525	Calibration	-
1456	14.5932	9647.47	0	?	0	525	Calibration	-
1457	14.6032	9647.18	0	?	0	525	Calibration	-
1458	14.6132	9684.82	0	?	0	525	Calibration	-
1459	14.6232	9688.97	0	?	0	525	Calibration	-
1460	14.6332	9715.86	0	?	0	525	Calibration	-
1461	14.6432	9736.49	0	?	0	525	Calibration	-
1462	14.6533	9708.67	0	?	0	525	Calibration	-
1463	14.6633	9655.71	0	?	0	525	Calibration	-
1464	14.6733	9698.86	0	?	0	525	Calibration	-
1465	14.6833	9718.86	0	?	0	525	Calibration	-
1466	14.6933	9727.53	0	?	0	525	Calibration	-
1467	14.7033	9739.47	0	?	0	525	Calibration	-
1468	14.7134	9798.45	0	?	0	525	Calibration	-
1469	14.7234	9831.21	0	?	0	525	Calibration	-
1470	14.7334	9704.68	0	?	0	525	Calibration	-
1471	14.7434	9713.78	0	?	0	525	Calibration	-
1472	14.7534	9729.84	0	?	0	525	Calibration	-
1473	14.7634	9750.26	0	?	0	525	Calibration	-
1474	14.7735	9775.21	0	?	0	525	Calibration	-
1475	14.7835	9751.38	0	?	0	525	Calibration	-
1476	14.7935	9798.79	0	?	0	525	Calibration	-
1477	14.8035	9758.38	0	?	0	525	Calibration	-
1478	14.8135	9800.79	0	?	0	525	Calibration	-
1479	14.8235	9750.92	0	?	0	525	Calibration	-
1480	14.8335	9730.67	0	?	0	525	Calibration	-
1481	14.8436	9741.72	0	?	0	525	Calibration	-
1482	14.8536	9744.24	0	?	0	525	Calibration	-
1483	14.8636	9656.79	0	?	0	525	Calibration	-
1484	14.8736	9673.12	0	?	0	525	Calibration	-
1485	14.8836	9617.22	0	?	0	525	Calibration	-
1486	14.8936	9597.46	0	?	0	525	Calibration	-
1487	14.9037	9642.85	0	?	0	525	Calibration	-
1488	14.9137	9684.92	0	?	0	525	Calibration	-
1489	14.9237	9725.32	0	?	0	525	Calibration	-
1490	14.9337	9710.26	0	?	0	525	Calibration	-
1491	14.9437	9670.89	0	?	0	525	Calibration	-
1492	14.9537	9717.11	0	?	0	525	Calibration	-
1493	14.9638	9701.12	0	?	0	525	Calibration	-
1494	14.9738	9666.76	0	?	0	525	Calibration	-
1495	14.9838	9613.81	0	?	0	525	Calibration	-
1496	14.9938	9667.59	0	?	0	525	Calibration	-
1497	15.0038	9659.52	0	?	0	525	Calibration	-
1498	15.0138	9644.96	0	?	0	525	Calibration	-
1499	15.0239	9663.08	0	?	0	525	Calibration	-
1500	15.0339	9649.85	0	?	0	525	Calibration	-
1501	15.0439	9695.84	0	?	0	525	Calibration	-
1502	15.0539	9670.7	0	?	0	525	Calibration	-
1503	15.0639	9689.27	0	?	0	525	Calibration	-
1504	15.0739	9626.24	0	?	0	525	Calibration	-
1505	15.0839	9666.45	0	?	0	525	Calibration	-
1506	15.094	9610.84	0	?	0	525	Calibration	-
1507	15.104	9629.16	0	?	0	525	Calibration	-
1508	15.114	9605.29	0	?	0	525	Calibration	-
1509	15.124	9605.02	0	?	0	525	Calibration	-
1510	15.134	9643.95	0	?	0	525	Calibration	-
1511	15.144	9589.64	0	?	0	525	Calibration	-
1512	15.1541	9683.08	0	?	0	525	Calibration	-
1513	15.1641	9676.7	0	?	0	525	Calibration	-
1514	15.1741	9710.5	0	?	0	525	Calibration	-
1515	15.1841	9670.04	0	?	0	525	Calibration	-
1516	15.1941	9675.7	0	?	0	525	Calibration	-
1517	15.2041	9743.01	0	?	0	525	Calibration	-
1518	15.2142	9789	0	?	0	525	Calibration	-
1519	15.2242	9680.94	0	?	0	525	Calibration	-
1520	15.2342	9714.44	0	?	0	525	Calibration	-
1521	15.2442	9770.89	0	?	0	525	Calibration	-
1522	15.2542	9689.27	0	?	0	525	Calibration	-
1523	15.2642	9664.01	0	?	0	525	Calibration	-
1524	15.2742	9602.76	0	?	0	525	Calibration	-
1525	15.2843	9545.46	0	?	0	525	Calibration	-
1526	15.2943	9572.27	0	?	0	525	Calibration	-
1527	15.3043	9552.13	0	?	0	525	Calibration	-
1528	15.3143	9660.75	0	?	0	525	Calibration	-
1529	15.3243	9702.43	0	?	0	525	Calibration	-
1530	15.3343	9709.76	0	?	0	525	Calibration	-
1531	15.3444	9625.18	0	?	0	525	Calibration	-
1532	15.3544	9549.49	0	?	0	525	Calibration	-
1533	15.3644	9549.16	0	?	0	525	Calibration	-
1534	15.3744	9621.78	0	?	0	525	Calibration	-
1535	15.3844	9629.55	0	?	0	525	Calibration	-
1536	15.3944	9610.74	0	?	0	525	Calibration	-
1537	15.4045	9622.62	0	?	0	525	Calibration	-
1538	15.4145	9660.31	0	?	0	525	Calibration	-
1539	15.4245	9669.75	0	?	0	525	Calibration	-
1540	15.4345	9723.71	0	?	0	525	Calibration	-
1541	15.4445	9706.66	0	?	0	525	Calibration	-
1542	15.4545	9770.85	0	?	0	525	Calibration	-
1543	15.4646	9686.11	0	?	0	525	Calibration	-
1544	15.4746	9692.96	0	?	0	525	Calibration	-
1545	15.4846	9688.86	0	?	0	525	Calibration	-
1546	15.4946	9628.34	0	?	0	525	Calibration	-
1547	15.5046	9675.67	0	?	0	525	Calibration	-
1548	15.5146	9718.31	0	?	0	525	Calibration	-
1549	15.5246	9704.56	0	?	0	525	Calibration	-
1550	15.5347	9695.02	0	?	0	525	Calibration	-
1551	15.5447	9601.94	0	?	0	525	Calibration	-
1552	15.5547	9710.07	0	?	0	525	Calibration	-
1553	15.5647	9704.04	0	?	0	525	Calibration	-
1554	15.5747	9719.07	0	?	0	525	Calibration	-
1555	15.5847	9679.91	0	?	0	525	Calibration	-
1556	15.5948	9611.39	0	?	0	525	Calibration	-
1557	15.6048	9667.11	0	?	0	525	Calibration	-
1558	15.6148	9699.5	0	?	0	525	Calibration	-
1559	15.6248	9721.51	0	?	0	525	Calibration	-
1560	15.6348	9662.24	0	?	0	525	Calibration	-
1561	15.6448	9709.42	0	?	0	525	Calibration	-
1562	15.6549	9779.17	0	?	0	525	Calibration	-
1563	15.6649	9798.81	0	?	0	525	Calibration	-
1564	15.6749	9794.97	0	?	0	525	Calibration	-
1565	15.6849	9789.47	0	?	0	525	Calibration	-
1566	15.6949	9660.03	0	?	0	525	Calibration	-
1567	15.7049	9659.21	0	?	0	525	Calibration	-
1568	15.7149	9655.76	0	?	0	525	Calibration	-
1569	15.725	9678.4	0	?	0	525	Calibration	-
1570	15.735	9656.05	0	?	0	525	Calibration	-
1571	15.745	9667.74	0	?	0	525	Calibration	-
1572	15.755	9660.56	0	?	0	525	Calibration	-
1573	15.765	9728.02	0	?	0	525	Calibration	-
1574	15.775	9798.25	0	?	0	525	Calibration	-
1575	15.7851	9799.5	0	?	0	525	Calibration	-
1576	15.7951	9741.33	0	?	0	525	Calibration	-
1577	15.8051	9648.35	0	?	0	525	Calibration	-
1578	15.8151	9639.83	0	?	0	525	Calibration	-
1579	15.8251	9701.05	0	?	0	525	Calibration	-
1580	15.8351	9749.9	0	?	0	525	Calibration	-
1581	15.8452	9708.7	0	?	0	525	Calibration	-
1582	15.8552	9672.4	0	?	0	525	Calibration	-
1583	15.8652	9677.9	0	?	0	525	Calibration	-
1584	15.8752	9636.93	0	?	0	525	Calibration	-
1585	15.8852	9622.63	0	?	0	525	Calibration	-
1586	15.8952	9651.71	0	?	0	525	Calibration	-
1587	15.9053	9675.98	0	?	0	525	Calibration	-
1588	15.9153	9727.15	0	?	0	525	Calibration	-
1589	15.9253	9755.07	0	?	0	525	Calibration	-
1590	15.9353	9694.18	0	?	0	525	Calibration	-
1591	15.9453	9688.47	0	?	0	525	Calibration	-
1592	15.9553	9659.31	0	?	0	525	Calibration	-
1593	15.9653	9720.08	0	?	0	525	Calibration	-
1594	15.9754	9803.13	0	?	0	525	Calibration	-
1595	15.9854	9775.28	0	?	0	525	Calibration	-
1596	15.9954	9756.73	0	?	0	525	Calibration	-
1597	16.0054	9683.92	0	?	0	525	Calibration	-
1598	16.0154	9690.03	0	?	0	525	Calibration	-
1599	16.0254	9733.78	0	?	0	525	Calibration	-
1600	16.0355	9744.98	0	?	0	525	Calibration	-
1601	16.0455	9781.79	0	?	0	525	Calibration	-
1602	16.0555	9694.77	0	?	0	525	Calibration	-
1603	16.0655	9739.92	0	?	0	525	Calibration	-
1604	16.0755	9734.86	0	?	0	525	Calibration	-
1605	16.0855	9801.4	0	?	0	525	Calibration	-
1606	16.0956	9832.2	0	?	0	525	Calibration	-
1607	16.1056	9758.6	0	?	0	525	Calibration	-
1608	16.1156	9738.07	0	?	0	525	Calibration	-
1609	16.1256	9702.85	0	?	0	525	Calibration	-
1610	16.1356	9750.45	0	?	0	525	Calibration	-
1611	16.1456	9775.5	0	?	0	525	Calibration	-
1612	16.1556	9768.67	0	?	0	525	Calibration	-
1613	16.1657	9772.95	0	?	0	525	Calibration	-
1614	16.1757	9757.53	0	?	0	525	Calibration	-
1615	16.1857	9778.68	0	?	0	525	Calibration	-
1616	16.1957	9768.14	0	?	0	525	Calibration	-
1617	16.2057	9730.74	0	?	0	525	Calibration	-
1618	16.2157	9746.6	0	?	0	525	Calibration	-
1619	16.2258	9706.5	0	?	0	525	Calibration	-
1620	16.2358	9649.82	0	?	0	525	Calibration	-
1621	16.2458	9698.34	0	?	0	525	Calibration	-
1622	16.2558	9770.08	0	?	0	525	Calibration	-
1623	16.2658	9756.01	0	?	0	525	Calibration	-
1624	16.2758	9752.38	0	?	0	525	Calibration	-
1625	16.2859	9712.96	0	?	0	525	Calibration	-
1626	16.2959	9778.21	0	?	0	525	Calibration	-
1627	16.3059	9750.26	0	?	0	525	Calibration	-
1628	16.3159	9753.46	0	?	0	525	Calibration	-
1629	16.3259	9754.06	0	?	0	525	Calibration	-
1630	16.3359	9760.14	0	?	0	525	Calibration	-
1631	16.346	9781.93	0	?	0	525	Calibration	-
1632	16.356	9736.65	0	?	0	525	Calibration	-
1633	16.366	9837.01	0	?	0	525	Calibration	-
1634	16.376	9841.76	0	?	0	525	Calibration	-
1635	16.386	9837.48	0	?	0	525	Calibration	-
1636	16.396	9755.98	0	?	0	525	Calibration	-
1637	16.406	9759.26	0	?	0	525	Calibration	-
1638	16.4161	9722.35	0	?	0	525	Calibration	-
1639	16.4261	9736.36	0	?	0	525	Calibration	-
1640	16.4361	9762.09	0	?	0	525	Calibration	-
1641	16.4461	9750.14	0	?	0	525	Calibration	-
1642	16.4561	9652	0	?	0	525	Calibration	-
1643	16.4661	9669.25	0	?	0	525	Calibration	-
1644	16.4762	9710.7	0	?	0	525	Calibration	-
1645	16.4862	9669.4	0	?	0	525	Calibration	-
1646	16.4962	9678.57	0	?	0	525	Calibration	-
1647	16.5062	9683.09	0	?	0	525	Calibration	-
1648	16.5162	9747.29	0	?	0	525	Calibration	-
1649	16.5262	9842.71	0	?	0	525	Calibration	-
1650	16.5363	9847.62	0	?	0	525	Calibration	-
1651	16.5463	9825.45	0	?	0	525	Calibration	-
1652	16.5563	9807.28	0	?	0	525	Calibration	-
1653	16.5663	9730.15	0	?	0	525	Calibration	-
1654	16.5763	9712.75	0	?	0	525	Calibration	-
1655	16.5863	9730	0	?	0	525	Calibration	-
1656	16.5963	9768.5	0	?	0	525	Calibration	-
1657	16.6064	9749.09	0	?	0	525	Calibration	-
1658	16.6164	9707.69	0	?	0	525	Calibration	-
1659	16.6264	9629.5	0	?	0	525	Calibration	-
1660	16.6364	9686.78	0	?	0	525	Calibration	-
1661	16.6464	9672.24	0	?	0	525	Calibration	-
1662	16.6564	9753.35	0	?	0	525	Calibration	-
1663	16.6665	9767.46	0	?	0	525	Calibration	-
1664	16.6765	9735.01	0	?	0	525	Calibration	-
1665	16.6865	9654.97	0	?	0	525	Calibration	-
1666	16.6965	9672.46	0	?	0	525	Calibration	-
1667	16.7065	9653.01	0	?	0	525	Calibration	-
1668	16.7165	9697.73	0	?	0	525	Calibration	-
1669	16.7266	9771.5	0	?	0	525	Calibration	-
1670	16.7366	9693.59	0	?	0	525	Calibration	-
1671	16.7466	9689.91	0	?	0	525	Calibration	-
1672	16.7566	9681.18	0	?	0	525	Calibration	-
1673	16.7666	9706.5	0	?	0	525	Calibration	-
1674	16.7766	9708.41	0	?	0	525	Calibration	-
1675	16.7867	9692.38	0	?	0	525	Calibration	-
1676	16.7967	9676.33	0	?	0	525	Calibration	-
1677	16.8067	9703.91	0	?	0	525	Calibration	-
1678	16.8167	9664.26	0	?	0	525	Calibration	-
1679	16.8267	9739.27	0	?	0	525	Calibration	-
1680	16.8367	9757.13	0	?	0	525	Calibration	-
1681	16.8467	9723.8	0	?	0	525	Calibration	-
1682	16.8568	9757.56	0	?	0	525	Calibration	-
1683	16.8668	9682.74	0	?	0	525	Calibration	-
1684	16.8768	9761.66	0	?	0	525	Calibration	-
1685	16.8868	9799.17	0	?	0	525	Calibration	-
1686	16.8968	9732.79	0	?	0	525	Calibration	-
1687	16.9068	9706.78	0	?	0	525	Calibration	-
1688	16.9169	9694.02	0	?	0	525	Calibration	-
1689	16.9269	9749.41	0	?	0	525	Calibration	-
1690	16.9369	9714.73	0	?	0	525	Calibration	-
1691	16.9469	9652.98	0	?	0	525	Calibration	-
1692	16.9569	9712.22	0	?	0	525	Calibration	-
1693	16.9669	9663.45	0	?	0	525	Calibration	-
1694	16.977	9685.59	0	?	0	525	Calibration	-
1695	16.987	9761	0	?	0	525	Calibration	-
1696	16.997	9709.59	0	?	0	525	Calibration	-
1697	17.007	9732.2	0	?	0	525	Calibration	-
1698	17.017	9751.62	0	?	0	525	Calibration	-
1699	17.027	9734.55	0	?	0	525	Calibration	-
1700	17.037	9755.15	0	?	0	525	Calibration	-
1701	17.0471	9676.91	0	?	0	525	Calibration	-
1702	17.0571	9685.54	0	?	0	525	Calibration	-
1703	17.0671	9712.47	0	?	0	525	Calibration	-
1704	17.0771	9675.23	0	?	0	525	Calibration	-
1705	17.0871	9711.34	0	?	0	525	Calibration	-
1706	17.0971	9675.12	0	?	0	525	Calibration	-
1707	17.1072	9664.06	0	?	0	525	Calibration	-
1708	17.1172	9712.88	0	?	0	525	Calibration	-
1709	17.1272	9695.79	0	?	0	525	Calibration	-
1710	17.1372	9610.43	0	?	0	525	Calibration	-
1711	17.1472	9677.54	0	?	0	525	Calibration	-
1712	17.1572	9696.4	0	?	0	525	Calibration	-
1713	17.1673	9729.94	0	?	0	525	Calibration	-
1714	17.1773	9686.73	0	?	0	525	Calibration	-
1715	17.1873	9702.36	0	?	0	525	Calibration	-
1716	17.1973	9645.18	0	?	0	525	Calibration	-
1717	17.2073	9652.8	0	?	0	525	Calibration	-
1718	17.2173	9652.3	0	?	0	525	Calibration	-
1719	17.2273	9658.78	0	?	0	525	Calibration	-
1720	17.2374	9742.8	0	?	0	525	Calibration	-
1721	17.2474	9691.63	0	?	0	525	Calibration	-
1722	17.2574	9682.22	0	?	0	525	Calibration	-
1723	17.2674	9721.28	0	?	0	525	Calibration	-
1724	17.2774	9699.52	0	?	0	525	Calibration	-
1725	17.2874	9674.36	0	?	0	525	Calibration	-
1726	17.2975	9679.83	0	?	0	525	Calibration	-
1727	17.3075	9555.03	0	?	0	525	Calibration	-
1728	17.3175	9538.56	0	?	0	525	Calibration	-
1729	17.3275	9584.61	0	?	0	525	Calibration	-
1730	17.3375	9537.68	0	?	0	525	Calibration	-
1731	17.3475	9553.64	0	?	0	525	Calibration	-
1732	17.3576	9639.52	0	?	0	525	Calibration	-
1733	17.3676	9654.09	0	?	0	525	Calibration	-
1734	17.3776	9761.01	0	?	0	525	Calibration	-
1735	17.3876	9761.27	0	?	0	525	Calibration	-
1736	17.3976	9681.26	0	?	0	525	Calibration	-
1737	17.4076	9708.36	0	?	0	525	Calibration	-
1738	17.4177	9678.22	0	?	0	525	Calibration	-
1739	17.4277	9715.37	0	?	0	525	Calibration	-
1740	17.4377	9728.87	0	?	0	525	Calibration	-
1741	17.4477	9694.51	0	?	0	525	Calibration	-
1742	17.4577	9701.29	0	?	0	525	Calibration	-
1743	17.4677	9604.77	0	?	0	525	Calibration	-
1744	17.4777	9667.89	0	?	0	525	Calibration	-
1745	17.4878	9655.19	0	?	0	525	Calibration	-
1746	17.4978	9625.72	0	?	0	525	Calibration	-
1747	17.5078	9598.82	0	?	0	525	Calibration	-
1748	17.5178	9701.51	0	?	0	525	Calibration	-
1749	17.5278	9752.49	0	?	0	525	Calibration	-
1750	17.5378	9742.69	0	?	0	525	Calibration	-
1751	17.5479	9627.82	0	?	0	525	Calibration	-
1752	17.5579	9649.47	0	?	0	525	Calibration	-
1753	17.5679	9714.38	0	?	0	525	Calibration	-
1754	17.5779	9749.32	0	?	0	525	Calibration	-
1755	17.5879	9683.31	0	?	0	525	Calibration	-
1756	17.5979	9668.85	0	?	0	525	Calibration	-
1757	17.608	9708.56	0	?	0	525	Calibration	-
1758	17.618	9668.27	0	?	0	525	Calibration	-
1759	17.628	9684.44	0	?	0	525	Calibration	-
1760	17.638	9710.79	0	?	0	525	Calibration	-
1761	17.648	9704.52	0	?	0	525	Calibration	-
1762	17.658	9689.43	0	?	0	525	Calibration	-
1763	17.668	9716.9	0	?	0	525	Calibration	-
1764	17.6781	9711.73	0	?	0	525	Calibration	-
1765	17.6881	9642.19	0	?	0	525	Calibration	-
1766	17.6981	9711.03	0	?	0	525	Calibration	-
1767	17.7081	9770.6	0	?	0	525	Calibration	-
1768	17.7181	9809.02	0	?	0	525	Calibration	-
1769	17.7281	9796.51	0	?	0	525	Calibration	-
1770	17.7382	9827.42	0	?	0	525	Calibration	-
1771	17.7482	9818.16	0	?	0	525	Calibration	-
1772	17.7582	9824.89	0	?	0	525	Calibration	-
1773	17.7682	9757.75	0	?	0	525	Calibration	-
1774	17.7782	9736.29	0	?	0	525	Calibration	-
1775	17.7882	9680.63	0	?	0	525	Calibration	-
1776	17.7983	9719.93	0	?	0	525	Calibration	-
1777	17.8083	9700.41	0	?	0	525	Calibration	-
1778	17.8183	9701.69	0	?	0	525	Calibration	-
1779	17.8283	9742.63	0	?	0	525	Calibration	-
1780	17.8383	9738.31	0	?	0	525	Calibration	-
1781	17.8483	9737.81	0	?	0	525	Calibration	-
1782	17.8584	9647.78	0	?	0	525	Calibration	-
1783	17.8684	9671.94	0	?	0	525	Calibration	-
1784	17.8784	9751.57	0	?	0	525	Calibration	-
1785	17.8884	9755.66	0	?	0	525	Calibration	-
1786	17.8984	9738.83	0	?	0	525	Calibration	-
1787	17.9084	9851.87	0	?	0	525	Calibration	-
1788	17.9184	9846.24	0	?	0	525	Calibration	-
1789	17.9285	9772.02	0	?	0	525	Calibration	-
1790	17.9385	9738.56	0	?	0	525	Calibration	-
1791	17.9485	9702.35	0	?	0	525	Calibration	-
1792	17.9585	9676.55	0	?	0	525	Calibration	-
1793	17.9685	9679.87	0	?	0	525	Calibration	-
1794	17.9785	9657.43	0	?	0	525	Calibration	-
1795	17.9886	9657.09	0	?	0	525	Calibration	-
1796	17.9986	9677.02	0	?	0	525	Calibration	-
1797	18.0086	9727.84	0	?	0	525	Calibration	-
1798	18.0186	9711.7	0	?	0	525	Calibration	-
1799	18.0286	9701.07	0	?	0	525	Calibration	-
1800	18.0386	9656.75	0	?	0	525	Calibration	-
1801	18.0487	9730.62	0	?	0	525	Calibration	-
1802	18.0587	9786.39	0	?	0	525	Calibration	-
1803	18.0687	9732.08	0	?	0	525	Calibration	-
1804	18.0787	9696.34	0	?	0	525	Calibration	-
1805	18.0887	9711.62	0	?	0	525	Calibration	-
1806	18.0987	9738.72	0	?	0	525	Calibration	-
1807	18.1087	9628.47	0	?	0	525	Calibration	-
1808	18.1188	9580.74	0	?	0	525	Calibration	-
1809	18.1288	9706.54	0	?	0	525	Calibration	-
1810	18.1388	9698.2	0	?	0	525	Calibration	-
1811	18.1488	9659.12	0	?	0	525	Calibration	-
1812	18.1588	9660.18	0	?	0	525	Calibration	-
1813	18.1688	9700.58	0	?	0	525	Calibration	-
1814	18.1789	9637.39	0	?	0	525	Calibration	-
1815	18.1889	9675.47	0	?	0	525	Calibration	-
1816	18.1989	9755.08	0	?	0	525	Calibration	-
1817	18.2089	9716.29	0	?	0	525	Calibration	-
1818	18.2189	9759.07	0	?	0	525	Calibration	-
1819	18.2289	9681.39		?	0	525	Calibration	-
1820	18.239	9673.74		?	0	525	Calibration	-
1821	18.249	9715.46		?	0	525	Calibration	-
1822	18.259	9714.13		?	0	525	Calibration	-
1823	18.269	9676.06		?	0	525	Calibration	-
1824	18.279	9678.83		?	0	525	Calibration	-
1825	18.289	9711.75		?	0	525	Calibration	-
1826	18.2991	9704.48		?	0	525	Calibration	-
1827	18.3091	9651.22		?	0	525	Calibration	-
1828	18.3191	9674.67		?	0	525	Calibration	-
1829	18.3291	9684.04		?	0	525	Bleach correction function: exp. offset = 658.2834153571591 * exp(-9.386661165943693E-4 * x) + 9572.89263740988	-
1830	18.3391	9717.43		?	0	525	Calculating F0: 10222.201802436133	Step 1: 0.0 %
1831	18.3491	9707	10248.1	-5.04	0.25	525	Hold. Current dF/F0 in tolerance range.	Step 1: 0.0 %
1832	18.3591	9694.63	10235.2	-5.16	0.13	525	Hold. Current dF/F0 in tolerance range.	Step 1: 0.0 %
1833	18.3692	9666.37	10205.5	-5.44	-0.16	525	Hold. Current dF/F0 in tolerance range.	Step 1: 0.0 %
1834	18.3792	9591.49	10126.5	-6.17	-0.94	525	Hold. Current dF/F0 in tolerance range.	Step 1: 0.0 %
1835	18.3892	9582.23	10116.9	-6.26	-1.03	525	Hold. Current dF/F0 in tolerance range.	Step 1: 0.0 %
1836	18.3992	9663.68	10203	-5.46	-0.19	525	Current dF/F0 smaller than holding dF/F0 (0.0 %). --> Change wavelength by 0.0 nm	Step 1: 0.0 %
1837	18.4092	9622.64	10159.8	-5.87	-0.61	525	Hold. Current dF/F0 in tolerance range.	Step 1: 0.0 %
1838	18.4192	9639.32	10177.5	-5.7	-0.44	525	Hold. Current dF/F0 in tolerance range.	Step 1: 0.0 %
1839	18.4293	9637.33	10175.5	-5.72	-0.46	525	Hold. Current dF/F0 in tolerance range.	Step 1: 0.0 %
1840	18.4393	9668.18	10208.2	-5.42	-0.14	525	Hold. Current dF/F0 in tolerance range.	Step 1: 0.0 %
1841	18.4493	9670.67	10211	-5.4	-0.11	525	Hold. Current dF/F0 in tolerance range.	Step 1: 0.0 %
1842	18.4593	9655.86	10195.4	-5.54	-0.26	525	Hold. Current dF/F0 in tolerance range.	Step 1: 0.0 %
1843	18.4693	9644.69	10183.8	-5.65	-0.38	525	Hold. Current dF/F0 in tolerance range.	Step 1: 0.0 %
1844	18.4793	9637.26	10176	-5.72	-0.45	525	Hold. Current dF/F0 in tolerance range.	Step 1: 0.0 %
1845	18.4894	9650.19	10189.8	-5.6	-0.32	525	Hold. Current dF/F0 in tolerance range.	Step 1: 0.0 %
1846	18.4994	9668.71	10209.5	-5.41	-0.12	525	Hold. Current dF/F0 in tolerance range.	Step 1: 0.0 %
1847	18.5094	9675.89	10217.2	-5.34	-0.05	525	Hold. Current dF/F0 in tolerance range.	Step 1: 0.0 %
1848	18.5194	9589.37	10125.9	-6.19	-0.94	525	Hold. Current dF/F0 in tolerance range.	Step 1: 0.0 %
1849	18.5294	9603.16	10140.6	-6.06	-0.8	525	Hold. Current dF/F0 in tolerance range.	Step 1: 0.0 %
1850	18.5394	9655.93	10196.4	-5.54	-0.25	525	Hold. Current dF/F0 in tolerance range.	Step 1: 0.0 %
1851	18.5494	9683.4	10225.5	-5.27	0.03	525	Hold. Current dF/F0 in tolerance range.	Step 1: 0.0 %
1852	18.5595	9689.34	10231.9	-5.21	0.1	525	Hold. Current dF/F0 in tolerance range.	Step 1: 0.0 %
1853	18.5695	9670.8	10212.5	-5.39	-0.1	525	Hold. Current dF/F0 in tolerance range.	Step 1: 0.0 %
1854	18.5795	9676.9	10219	-5.33	-0.03	525	Hold. Current dF/F0 in tolerance range.	Step 1: 0.0 %
1855	18.5895	9651.66	10192.5	-5.58	-0.29	525	Hold. Current dF/F0 in tolerance range.	Step 1: 0.0 %
1856	18.5995	9738.69	10284.5	-4.73	0.61	525	Hold. Current dF/F0 in tolerance range.	Step 1: 0.0 %
1857	18.6095	9720.67	10265.6	-4.91	0.42	525	Hold. Current dF/F0 in tolerance range.	Step 1: 0.0 %
1858	18.6196	9644.78	10185.6	-5.65	-0.36	525	Hold. Current dF/F0 in tolerance range.	Step 1: 0.0 %
1859	18.6296	9688.02	10231.3	-5.23	0.09	525	Hold. Current dF/F0 in tolerance range.	Step 1: 0.0 %
1860	18.6396	9722.63	10268	-4.89	0.45	525	Hold. Current dF/F0 in tolerance range.	Step 1: 0.0 %
1861	18.6496	9727.48	10273.2	-4.84	0.5	525	Hold. Current dF/F0 in tolerance range.	Step 1: 0.0 %
1862	18.6596	9670.62	10213.3	-5.4	-0.09	525	Hold. Current dF/F0 in tolerance range.	Step 1: 0.0 %
1863	18.6696	9719.68	10265.2	-4.92	0.42	525	Hold. Current dF/F0 in tolerance range.	Step 1: 0.0 %
1864	18.6797	9654.65	10196.7	-5.55	-0.25	525	Hold. Current dF/F0 in tolerance range.	Step 1: 0.0 %
1865	18.6897	9609.09	10148.7	-6	-0.72	525	Hold. Current dF/F0 in tolerance range.	Step 1: 0.0 %
1866	18.6997	9582.52	10120.7	-6.26	-0.99	525	Hold. Current dF/F0 in tolerance range.	Step 1: 0.0 %
1867	18.7097	9630.7	10171.7	-5.79	-0.49	525	Hold. Current dF/F0 in tolerance range.	Step 1: 0.0 %
1868	18.7197	9677.19	10220.9	-5.33	-0.01	525	Hold. Current dF/F0 in tolerance range.	Step 1: 0.0 %
1869	18.7297	9725.88	10272.5	-4.86	0.49	525	Hold. Current dF/F0 in tolerance range.	Step 1: 0.0 %
1870	18.7398	9706.87	10252.5	-5.04	0.3	525	Hold. Current dF/F0 in tolerance range.	Step 1: 0.0 %
1871	18.7498	9649.17	10191.7	-5.61	-0.3	525	Hold. Current dF/F0 in tolerance range.	Step 1: 0.0 %
1872	18.7598	9665.56	10209.1	-5.45	-0.13	525	Hold. Current dF/F0 in tolerance range.	Step 1: 0.0 %
1873	18.7698	9586.72	10125.9	-6.22	-0.94	525	Hold. Current dF/F0 in tolerance range.	Step 1: 0.0 %
1874	18.7798	9612.91	10153.7	-5.96	-0.67	525	Hold. Current dF/F0 in tolerance range.	Step 1: 0.0 %
1875	18.7898	9604.71	10145.2	-6.04	-0.75	525	Hold. Current dF/F0 in tolerance range.	Step 1: 0.0 %
1876	18.7998	9592.32	10132.2	-6.16	-0.88	525	Hold. Current dF/F0 in tolerance range.	Step 1: 0.0 %
1877	18.8099	9635.84	10178.3	-5.74	-0.43	525	Hold. Current dF/F0 in tolerance range.	Step 1: 0.0 %
1878	18.8199	9573.02	10112	-6.35	-1.08	525	Hold. Current dF/F0 in tolerance range.	Step 1: 0.0 %
1879	18.8299	9651.08	10194.6	-5.59	-0.27	525	Current dF/F0 smaller than holding dF/F0 (0.0 %). --> Change wavelength by 0.0 nm	Step 1: 0.0 %
1880	18.8399	9672.84	10217.7	-5.37	-0.04	525	Hold. Current dF/F0 in tolerance range.	Step 1: 0.0 %
1881	18.8499	9659.21	10203.4	-5.51	-0.18	525	Hold. Current dF/F0 in tolerance range.	Step 1: 0.0 %
1882	18.8599	9616.39	10158.3	-5.93	-0.63	525	Hold. Current dF/F0 in tolerance range.	Step 1: 0.0 %
1883	18.87	9658.42	10202.8	-5.52	-0.19	525	Hold. Current dF/F0 in tolerance range.	Step 1: 0.0 %
1884	18.88	9651.7	10195.8	-5.58	-0.26	525	Hold. Current dF/F0 in tolerance range.	Step 1: 0.0 %
1885	18.89	9610.69	10152.6	-5.98	-0.68	525	Hold. Current dF/F0 in tolerance range.	Step 1: 0.0 %
1886	18.9	9602.27	10143.8	-6.06	-0.77	525	Hold. Current dF/F0 in tolerance range.	Step 1: 0.0 %
1887	18.91	9593.13	10134.2	-6.15	-0.86	525	Hold. Current dF/F0 in tolerance range.	Step 1: 0.0 %
1888	18.92	9593.92	10135.2	-6.15	-0.85	525	Hold. Current dF/F0 in tolerance range.	Step 1: 0.0 %
1889	18.9301	9614.08	10156.6	-5.95	-0.64	525	Hold. Current dF/F0 in tolerance range.	Step 1: 0.0 %
1890	18.9401	9625.39	10168.7	-5.84	-0.52	525	Hold. Current dF/F0 in tolerance range.	Step 1: 0.0 %
1891	18.9501	9688.97	10235.9	-5.22	0.13	525	Hold. Current dF/F0 in tolerance range.	Step 1: 0.0 %
1892	18.9601	9696.05	10243.5	-5.15	0.21	525	Hold. Current dF/F0 in tolerance range.	Step 1: 0.0 %
1893	18.9701	9632.17	10176.2	-5.77	-0.45	525	Hold. Current dF/F0 in tolerance range.	Step 1: 0.0 %
1894	18.9801	9669.42	10215.6	-5.41	-0.06	525	Hold. Current dF/F0 in tolerance range.	Step 1: 0.0 %
1895	18.9901	9642.4	10187.2	-5.67	-0.34	525	Hold. Current dF/F0 in tolerance range.	Step 1: 0.0 %
1896	19.0002	9599.8	10142.3	-6.09	-0.78	525	Hold. Current dF/F0 in tolerance range.	Step 1: 0.0 %
1897	19.0102	9649.56	10195	-5.6	-0.27	525	Hold. Current dF/F0 in tolerance range.	Step 1: 0.0 %
1898	19.0202	9608.39	10151.6	-6	-0.69	525	Hold. Current dF/F0 in tolerance range.	Step 1: 0.0 %
1899	19.0302	9615.11	10158.8	-5.94	-0.62	525	Hold. Current dF/F0 in tolerance range.	Step 1: 0.0 %
1900	19.0402	9636.67	10181.7	-5.73	-0.4	525	Hold. Current dF/F0 in tolerance range.	Step 1: 0.0 %
1901	19.0502	9495.61	10032.8	-7.11	-1.85	525	Hold. Current dF/F0 in tolerance range.	Step 1: 0.0 %
1902	19.0603	9473.79	10009.8	-7.32	-2.08	525	Current dF/F0 smaller than holding dF/F0 (0.0 %). --> Change wavelength by 2.0 nm	Step 1: 0.0 %
1903	19.0703	9562.62	10103.8	-6.45	-1.16	527	Current dF/F0 smaller than holding dF/F0 (0.0 %). --> Change wavelength by 1.0 nm	Step 1: 0.0 %
1904	19.0803	9635.11	10180.5	-5.74	-0.41	528	Current dF/F0 smaller than holding dF/F0 (0.0 %). --> Change wavelength by 0.0 nm	Step 1: 0.0 %
1905	19.0903	9649.82	10196.1	-5.6	-0.26	528	Hold. Current dF/F0 in tolerance range.	Step 1: 0.0 %
1906	19.1003	9676.85	10224.8	-5.33	0.03	528	Hold. Current dF/F0 in tolerance range.	Step 1: 0.0 %
1907	19.1103	9674.87	10222.8	-5.35	0.01	528	Hold. Current dF/F0 in tolerance range.	Step 1: 0.0 %
1908	19.1204	9669.18	10216.9	-5.41	-0.05	528	Hold. Current dF/F0 in tolerance range.	Step 1: 0.0 %
1909	19.1304	9625.9	10171.3	-5.83	-0.5	528	Hold. Current dF/F0 in tolerance range.	Step 1: 0.0 %
1910	19.1404	9619.76	10164.9	-5.89	-0.56	528	Hold. Current dF/F0 in tolerance range.	Step 1: 0.0 %
1911	19.1504	9660.28	10207.8	-5.5	-0.14	528	Hold. Current dF/F0 in tolerance range.	Step 1: 0.0 %
1912	19.1604	9551.1	10092.6	-6.57	-1.27	528	Hold. Current dF/F0 in tolerance range.	Step 1: 0.0 %
1913	19.1704	9582.96	10126.3	-6.25	-0.94	528	Current dF/F0 smaller than holding dF/F0 (0.0 %). --> Change wavelength by 0.0 nm	Step 1: 0.0 %
1914	19.1805	9662.15	10210.1	-5.48	-0.12	528	Hold. Current dF/F0 in tolerance range.	Step 1: 0.0 %
1915	19.1905	9614.34	10159.7	-5.95	-0.61	528	Hold. Current dF/F0 in tolerance range.	Step 1: 0.0 %
1916	19.2005	9652.67	10200.3	-5.57	-0.21	528	Hold. Current dF/F0 in tolerance range.	Step 1: 0.0 %
1917	19.2105	9773.16	10327.8	-4.39	1.03	528	Hold. Current dF/F0 in tolerance range.	Step 1: 0.0 %
1918	19.2205	9715.46	10266.9	-4.96	0.44	528	Current dF/F0 greater than holding dF/F0 (0.0 %). --> Change wavelength by 0.0 nm	Step 1: 0.0 %
1919	19.2305	9683.73	10233.5	-5.27	0.11	528	Hold. Current dF/F0 in tolerance range.	Step 1: 0.0 %
1920	19.2405	9741.86	10295	-4.7	0.71	528	Hold. Current dF/F0 in tolerance range.	Step 1: 0.0 %
1921	19.2506	9677.19	10226.8	-5.33	0.04	528	Hold. Current dF/F0 in tolerance range.	Step 1: 0.0 %
1922	19.2606	9648.51	10196.6	-5.61	-0.25	528	Hold. Current dF/F0 in tolerance range.	Step 1: 0.0 %
1923	19.2706	9643.81	10191.7	-5.66	-0.3	528	Hold. Current dF/F0 in tolerance range.	Step 1: 0.0 %
1924	19.2806	9658.19	10207	-5.52	-0.15	528	Hold. Current dF/F0 in tolerance range.	Step 1: 0.0 %
1925	19.2906	9626.01	10173.1	-5.83	-0.48	528	Hold. Current dF/F0 in tolerance range.	Step 1: 0.0 %
1926	19.3006	9567.12	10111	-6.41	-1.09	528	Hold. Current dF/F0 in tolerance range.	Step 1: 0.0 %
1927	19.3107	9582.14	10127	-6.26	-0.93	528	Current dF/F0 smaller than holding dF/F0 (0.0 %). --> Change wavelength by 0.0 nm	Step 1: 0.0 %
1928	19.3207	9632	10179.8	-5.77	-0.42	528	Hold. Current dF/F0 in tolerance range.	Step 1: 0.0 %
1929	19.3307	9710.06	10262.4	-5.01	0.39	528	Hold. Current dF/F0 in tolerance range.	Step 1: 0.0 %
1930	19.3407	9650.54	10199.6	-5.59	-0.22	528	Hold. Current dF/F0 in tolerance range.	Step 1: 0.0 %
1931	19.3507	9661.61	10211.4	-5.48	-0.11	528	Hold. Current dF/F0 in tolerance range.	Step 1: 0.0 %
1932	19.3607	9650.96	10200.2	-5.59	-0.22	528	Hold. Current dF/F0 in tolerance range.	Step 1: 0.0 %
1933	19.3708	9642.06	10190.9	-5.68	-0.31	528	Hold. Current dF/F0 in tolerance range.	Step 1: 0.0 %
1934	19.3808	9583.18	10128.8	-6.25	-0.91	528	Hold. Current dF/F0 in tolerance range.	Step 1: 0.0 %
1935	19.3908	9646.68	10196	-5.63	-0.26	528	Hold. Current dF/F0 in tolerance range.	Step 1: 0.0 %
1936	19.4008	9657.59	10207.6	-5.52	-0.14	528	Hold. Current dF/F0 in tolerance range.	Step 1: 0.0 %
1937	19.4108	9646.83	10196.4	-5.63	-0.25	528	Hold. Current dF/F0 in tolerance range.	Step 1: 0.0 %
1938	19.4208	9669.22	10220.1	-5.41	-0.02	528	Hold. Current dF/F0 in tolerance range.	Step 1: 0.0 %
1939	19.4308	9580.78	10126.8	-6.27	-0.93	528	Hold. Current dF/F0 in tolerance range.	Step 1: 0.0 %
1940	19.4409	9567.61	10113	-6.4	-1.07	528	Hold. Current dF/F0 in tolerance range.	Step 1: 0.0 %
1941	19.4509	9611.24	10159.2	-5.98	-0.62	528	Current dF/F0 smaller than holding dF/F0 (0.0 %). --> Change wavelength by 0.0 nm	Step 1: 0.0 %
1942	19.4609	9570.23	10115.9	-6.38	-1.04	528	Hold. Current dF/F0 in tolerance range.	Step 1: 0.0 %
1943	19.4709	9639.75	10189.5	-5.7	-0.32	528	Current dF/F0 smaller than holding dF/F0 (0.0 %). --> Change wavelength by 0.0 nm	Step 1: 0.0 %
1944	19.4809	9702.97	10256.5	-5.08	0.34	528	Hold. Current dF/F0 in tolerance range.	Step 1: 0.0 %
1945	19.4909	9599.24	10146.9	-6.09	-0.74	528	Hold. Current dF/F0 in tolerance range.	Step 1: 0.0 %
1946	19.501	9608.11	10156.4	-6.01	-0.64	528	Hold. Current dF/F0 in tolerance range.	Step 1: 0.0 %
1947	19.511	9553.37	10098.6	-6.54	-1.21	528	Hold. Current dF/F0 in tolerance range.	Step 1: 0.0 %
1948	19.521	9465.36	10005.7	-7.4	-2.12	528	Current dF/F0 smaller than holding dF/F0 (0.0 %). --> Change wavelength by 2.0 nm	Step 1: 0.0 %
1949	19.531	9565.26	10111.4	-6.43	-1.08	530	Current dF/F0 smaller than holding dF/F0 (0.0 %). --> Change wavelength by 1.0 nm	Step 1: 0.0 %
1950	19.541	9686.47	10239.7	-5.24	0.17	531	Current dF/F0 smaller than holding dF/F0 (0.0 %). --> Change wavelength by 0.0 nm	Step 1: 0.0 %
1951	19.551	9668.98	10221.3	-5.41	-0.01	531	Hold. Current dF/F0 in tolerance range.	Step 1: 0.0 %
1952	19.5611	9771.33	10329.6	-4.41	1.05	531	Hold. Current dF/F0 in tolerance range.	Step 1: 0.0 %
1953	19.5711	9738.46	10294.9	-4.73	0.71	531	Current dF/F0 greater than holding dF/F0 (0.0 %). --> Change wavelength by 0.0 nm	Step 1: 0.0 %
1954	19.5811	9807.63	10368.2	-4.06	1.43	531	Hold. Current dF/F0 in tolerance range.	Step 1: 0.0 %
1955	19.5911	9733.97	10290.4	-4.78	0.67	531	Current dF/F0 greater than holding dF/F0 (0.0 %). --> Change wavelength by 0.0 nm	Step 1: 0.0 %
1956	19.6011	9550.75	10096.8	-6.57	-1.23	531	Hold. Current dF/F0 in tolerance range.	Step 1: 0.0 %
1957	19.6111	9612.02	10161.7	-5.97	-0.59	531	Current dF/F0 smaller than holding dF/F0 (0.0 %). --> Change wavelength by 0.0 nm	Step 1: 0.0 %
1958	19.6212	9696.36	10251	-5.14	0.28	531	Hold. Current dF/F0 in tolerance range.	Step 1: 0.0 %
1959	19.6312	9737.18	10294.2	-4.74	0.7	531	Hold. Current dF/F0 in tolerance range.	Step 1: 0.0 %
1960	19.6412	9791.61	10351.9	-4.21	1.27	531	Hold. Current dF/F0 in tolerance range.	Step 1: 0.0 %
1961	19.6512	9826.71	10389.1	-3.87	1.63	531	Current dF/F0 greater than holding dF/F0 (0.0 %). --> Change wavelength by 1.0 nm	Step 1: 0.0 %
1962	19.6612	9732.19	10289.2	-4.79	0.66	530	Current dF/F0 greater than holding dF/F0 (0.0 %). --> Change wavelength by 0.0 nm	Step 1: 0.0 %
1963	19.6712	9700.63	10256	-5.1	0.33	530	Hold. Current dF/F0 in tolerance range.	Step 1: 0.0 %
1964	19.6812	9689.16	10244	-5.21	0.21	530	Hold. Current dF/F0 in tolerance range.	Step 1: 0.0 %
1965	19.6913	9741.14	10299	-4.71	0.75	530	Hold. Current dF/F0 in tolerance range.	Step 1: 0.0 %
1966	19.7013	9723.13	10280.1	-4.88	0.57	530	Hold. Current dF/F0 in tolerance range.	Step 1: 0.0 %
1967	19.7113	9641.49	10193.9	-5.68	-0.28	530	Hold. Current dF/F0 in tolerance range.	Step 1: 0.0 %
1968	19.7213	9736.34	10294.3	-4.75	0.7	530	Hold. Current dF/F0 in tolerance range.	Step 1: 0.0 %
1969	19.7313	9724.1	10281.4	-4.87	0.58	530	Hold. Current dF/F0 in tolerance range.	Step 1: 0.0 %
1970	19.7413	9722.84	10280.2	-4.89	0.57	530	Hold. Current dF/F0 in tolerance range.	Step 1: 0.0 %
1971	19.7514	9736.08	10294.3	-4.76	0.71	530	Hold. Current dF/F0 in tolerance range.	Step 1: 0.0 %
1972	19.7614	9574	10123	-6.34	-0.97	530	Hold. Current dF/F0 in tolerance range.	Step 1: 0.0 %
1973	19.7714	9609.09	10160.2	-6	-0.61	530	Hold. Current dF/F0 in tolerance range.	Step 1: 0.0 %
1974	19.7814	9659.71	10213.9	-5.5	-0.08	530	Hold. Current dF/F0 in tolerance range.	Step 1: 0.0 %
1975	19.7914	9699.46	10256	-5.11	0.33	530	Hold. Current dF/F0 in tolerance range.	Step 1: 0.0 %
1976	19.8014	9708.76	10265.9	-5.02	0.43	530	Hold. Current dF/F0 in tolerance range.	Step 1: 0.0 %
1977	19.8115	9642.91	10196.4	-5.67	-0.25	530	Hold. Current dF/F0 in tolerance range.	Step 1: 0.0 %
1978	19.8215	9751.44	10311.3	-4.61	0.87	530	Hold. Current dF/F0 in tolerance range.	Step 1: 0.0 %
1979	19.8315	9773.24	10334.4	-4.39	1.1	530	Hold. Current dF/F0 in tolerance range.	Step 1: 0.0 %
1980	19.8415	9691.71	10248.3	-5.19	0.26	530	Current dF/F0 greater than holding dF/F0 (0.0 %). --> Change wavelength by 0.0 nm	Step 1: 0.0 %
1981	19.8515	9714.96	10273	-4.96	0.5	530	Hold. Current dF/F0 in tolerance range.	Step 1: 0.0 %
1982	19.8615	9637.54	10191.2	-5.72	-0.3	530	Hold. Current dF/F0 in tolerance range.	Step 1: 0.0 %
1983	19.8715	9690.06	10246.9	-5.21	0.24	530	Hold. Current dF/F0 in tolerance range.	Step 1: 0.0 %
1984	19.8816	9671.93	10227.8	-5.38	0.05	530	Hold. Current dF/F0 in tolerance range.	Step 1: 0.0 %
1985	19.8916	9645.81	10200.3	-5.64	-0.21	530	Hold. Current dF/F0 in tolerance range.	Step 1: 0.0 %
1986	19.9016	9589.92	10141.3	-6.19	-0.79	530	Hold. Current dF/F0 in tolerance range.	Step 1: 0.0 %
1987	19.9116	9658.18	10213.5	-5.52	-0.08	530	Hold. Current dF/F0 in tolerance range.	Step 1: 0.0 %
1988	19.9216	9680.79	10237.6	-5.3	0.15	530	Hold. Current dF/F0 in tolerance range.	Step 1: 0.0 %
1989	19.9316	9702.05	10260.1	-5.09	0.37	530	Hold. Current dF/F0 in tolerance range.	Step 1: 0.0 %
1990	19.9417	9727.31	10287	-4.84	0.63	530	Hold. Current dF/F0 in tolerance range.	Step 1: 0.0 %
1991	19.9517	9704.57	10263	-5.06	0.4	530	Hold. Current dF/F0 in tolerance range.	Step 1: 0.0 %
1992	19.9617	9582.94	10134.5	-6.25	-0.86	530	Hold. Current dF/F0 in tolerance range.	Step 1: 0.0 %
1993	19.9717	9630.8	10185.2	-5.79	-0.36	530	Hold. Current dF/F0 in tolerance range.	Step 1: 0.0 %
[truncated: 836 more rows]

## Sheet: 1 G
	1		2		3		4		5		6		7		8		9		10		11		12		13		14		15		16		17		18		19		20		21		22		23		24
																																																	DF/F0
Time	dF/F0_bleach_correct	Wavelength	dF/F0_bleach_correct	Wavelength	dF/F0_bleach_correct	Wavelength	dF/F0_bleach_correct	Wavelength	dF/F0_bleach_correct	Wavelength	dF/F0_bleach_correct	Wavelength	dF/F0_bleach_correct	Wavelength	dF/F0_bleach_correct	Wavelength	dF/F0_bleach_correct	Wavelength	dF/F0_bleach_correct	Wavelength	dF/F0_bleach_correct	Wavelength	dF/F0_bleach_correct	Wavelength	dF/F0_bleach_correct	Wavelength	dF/F0_bleach_correct	Wavelength	dF/F0_bleach_correct	Wavelength	dF/F0_bleach_correct	Wavelength	dF/F0_bleach_correct	Wavelength	dF/F0_bleach_correct	Wavelength	dF/F0_bleach_correct	Wavelength	dF/F0_bleach_correct	Wavelength	dF/F0_bleach_correct	Wavelength	dF/F0_bleach_correct	Wavelength	dF/F0_bleach_correct	Wavelength	dF/F0_bleach_correct	Wavelength	Mean
0.01	0	525	0	525	0	525	0	525	0	530	0	525	0	530	0	525	0	525	0	525	0	525	0	530	0	530	0	525	0	525	0	520	0	525	0	525	0	525	0	535	0	525	0	525	0	525	0	525	0
0.02	0	525	0	525	0	525	0	525	0	530	0	525	0	530	0	525	0	525	0	525	0	525	0	530	0	530	0	525	0	525	0	520	0	525	0	525	0	525	0	535	0	525	0	525	0	525	0	525	0
0.03	0	525	0	525	0	525	0	525	0	530	0	525	0	530	0	525	0	525	0	525	0	525	0	530	0	530	0	525	0	525	0	520	0	525	0	525	0	525	0	535	0	525	0	525	0	525	0	525	0
0.0401	0	525	0	525	0	525	0	525	0	530	0	525	0	530	0	525	0	525	0	525	0	525	0	530	0	530	0	525	0	525	0	520	0	525	0	525	0	525	0	535	0	525	0	525	0	525	0	525	0
0.0501	0	525	0	525	0	525	0	525	0	530	0	525	0	530	0	525	0	525	0	525	0	525	0	530	0	530	0	525	0	525	0	520	0	525	0	525	0	525	0	535	0	525	0	525	0	525	0	525	0
0.0601	0	525	0	525	0	525	0	525	0	530	0	525	0	530	0	525	0	525	0	525	0	525	0	530	0	530	0	525	0	525	0	520	0	525	0	525	0	525	0	535	0	525	0	525	0	525	0	525	0
0.0701	0	525	0	525	0	525	0	525	0	530	0	525	0	530	0	525	0	525	0	525	0	525	0	530	0	530	0	525	0	525	0	520	0	525	0	525	0	525	0	535	0	525	0	525	0	525	0	525	0
0.0801	0	525	0	525	0	525	0	525	0	530	0	525	0	530	0	525	0	525	0	525	0	525	0	530	0	530	0	525	0	525	0	520	0	525	0	525	0	525	0	535	0	525	0	525	0	525	0	525	0
0.0901	0	525	0	525	0	525	0	525	0	530	0	525	0	530	0	525	0	525	0	525	0	525	0	530	0	530	0	525	0	525	0	520	0	525	0	525	0	525	0	535	0	525	0	525	0	525	0	525	0
0.1002	0	525	0	525	0	525	0	525	0	530	0	525	0	530	0	525	0	525	0	525	0	525	0	530	0	530	0	525	0	525	0	520	0	525	0	525	0	525	0	535	0	525	0	525	0	525	0	525	0
0.1102	0	525	0	525	0	525	0	525	0	530	0	525	0	530	0	525	0	525	0	525	0	525	0	530	0	530	0	525	0	525	0	520	0	525	0	525	0	525	0	535	0	525	0	525	0	525	0	525	0
0.1202	0	525	0	525	0	525	0	525	0	530	0	525	0	530	0	525	0	525	0	525	0	525	0	530	0	530	0	525	0	525	0	520	0	525	0	525	0	525	0	535	0	525	0	525	0	525	0	525	0
0.1302	0	525	0	525	0	525	0	525	0	530	0	525	0	530	0	525	0	525	0	525	0	525	0	530	0	530	0	525	0	525	0	520	0	525	0	525	0	525	0	535	0	525	0	525	0	525	0	525	0
0.1402	0	525	0	525	0	525	0	525	0	530	0	525	0	530	0	525	0	525	0	525	0	525	0	530	0	530	0	525	0	525	0	520	0	525	0	525	0	525	0	535	0	525	0	525	0	525	0	525	0
0.1502	0	525	0	525	0	525	0	525	0	530	0	525	0	530	0	525	0	525	0	525	0	525	0	530	0	530	0	525	0	525	0	520	0	525	0	525	0	525	0	535	0	525	0	525	0	525	0	525	0
0.1602	0	525	0	525	0	525	0	525	0	530	0	525	0	530	0	525	0	525	0	525	0	525	0	530	0	530	0	525	0	525	0	520	0	525	0	525	0	525	0	535	0	525	0	525	0	525	0	525	0
0.1703	0	525	0	525	0	525	0	525	0	530	0	525	0	530	0	525	0	525	0	525	0	525	0	530	0	530	0	525	0	525	0	520	0	525	0	525	0	525	0	535	0	525	0	525	0	525	0	525	0
0.1803	0	525	0	525	0	525	0	525	0	530	0	525	0	530	0	525	0	525	0	525	0	525	0	530	0	530	0	525	0	525	0	520	0	525	0	525	0	525	0	535	0	525	0	525	0	525	0	525	0
0.1903	0	525	0	525	0	525	0	525	0	530	0	525	0	530	0	525	0	525	0	525	0	525	0	530	0	530	0	525	0	525	0	520	0	525	0	525	0	525	0	535	0	525	0	525	0	525	0	525	0
0.2003	0	525	0	525	0	525	0	525	0	530	0	525	0	530	0	525	0	525	0	525	0	525	0	530	0	530	0	525	0	525	0	520	0	525	0	525	0	525	0	535	0	525	0	525	0	525	0	525	0
0.2103	0	525	0	525	0	525	0	525	0	530	0	525	0	530	0	525	0	525	0	525	0	525	0	530	0	530	0	525	0	525	0	520	0	525	0	525	0	525	0	535	0	525	0	525	0	525	0	525	0
0.2203	0	525	0	525	0	525	0	525	0	530	0	525	0	530	0	525	0	525	0	525	0	525	0	530	0	530	0	525	0	525	0	520	0	525	0	525	0	525	0	535	0	525	0	525	0	525	0	525	0
0.2304	0	525	0	525	0	525	0	525	0	530	0	525	0	530	0	525	0	525	0	525	0	525	0	530	0	530	0	525	0	525	0	520	0	525	0	525	0	525	0	535	0	525	0	525	0	525	0	525	0
0.2404	0	525	0	525	0	525	0	525	0	530	0	525	0	530	0	525	0	525	0	525	0	525	0	530	0	530	0	525	0	525	0	520	0	525	0	525	0	525	0	535	0	525	0	525	0	525	0	525	0
0.2504	0	525	0	525	0	525	0	525	0	530	0	525	0	530	0	525	0	525	0	525	0	525	0	530	0	530	0	525	0	525	0	520	0	525	0	525	0	525	0	535	0	525	0	525	0	525	0	525	0
0.2604	0	525	0	525	0	525	0	525	0	530	0	525	0	530	0	525	0	525	0	525	0	525	0	530	0	530	0	525	0	525	0	520	0	525	0	525	0	525	0	535	0	525	0	525	0	525	0	525	0
0.2704	0	525	0	525	0	525	0	525	0	530	0	525	0	530	0	525	0	525	0	525	0	525	0	530	0	530	0	525	0	525	0	520	0	525	0	525	0	525	0	535	0	525	0	525	0	525	0	525	0
0.2804	0	525	0	525	0	525	0	525	0	530	0	525	0	530	0	525	0	525	0	525	0	525	0	530	0	530	0	525	0	525	0	520	0	525	0	525	0	525	0	535	0	525	0	525	0	525	0	525	0
0.2905	0	525	0	525	0	525	0	525	0	530	0	525	0	530	0	525	0	525	0	525	0	525	0	530	0	530	0	525	0	525	0	520	0	525	0	525	0	525	0	535	0	525	0	525	0	525	0	525	0
0.3005	0	525	0	525	0	525	0	525	0	530	0	525	0	530	0	525	0	525	0	525	0	525	0	530	0	530	0	525	0	525	0	520	0	525	0	525	0	525	0	535	0	525	0	525	0	525	0	525	0
0.3105	0	525	0	525	0	525	0	525	0	530	0	525	0	530	0	525	0	525	0	525	0	525	0	530	0	530	0	525	0	525	0	520	0	525	0	525	0	525	0	535	0	525	0	525	0	525	0	525	0
0.3205	0	525	0	525	0	525	0	525	0	530	0	525	0	530	0	525	0	525	0	525	0	525	0	530	0	530	0	525	0	525	0	520	0	525	0	525	0	525	0	535	0	525	0	525	0	525	0	525	0
0.3305	0	525	0	525	0	525	0	525	0	530	0	525	0	530	0	525	0	525	0	525	0	525	0	530	0	530	0	525	0	525	0	520	0	525	0	525	0	525	0	535	0	525	0	525	0	525	0	525	0
0.3405	0	525	0	525	0	525	0	525	0	530	0	525	0	530	0	525	0	525	0	525	0	525	0	530	0	530	0	525	0	525	0	520	0	525	0	525	0	525	0	535	0	525	0	525	0	525	0	525	0
0.3505	0	525	0	525	0	525	0	525	0	530	0	525	0	530	0	525	0	525	0	525	0	525	0	530	0	530	0	525	0	525	0	520	0	525	0	525	0	525	0	535	0	525	0	525	0	525	0	525	0
0.3606	0	525	0	525	0	525	0	525	0	530	0	525	0	530	0	525	0	525	0	525	0	525	0	530	0	530	0	525	0	525	0	520	0	525	0	525	0	525	0	535	0	525	0	525	0	525	0	525	0
0.3706	0	525	0	525	0	525	0	525	0	530	0	525	0	530	0	525	0	525	0	525	0	525	0	530	0	530	0	525	0	525	0	520	0	525	0	525	0	525	0	535	0	525	0	525	0	525	0	525	0
0.3806	0	525	0	525	0	525	0	525	0	530	0	525	0	530	0	525	0	525	0	525	0	525	0	530	0	530	0	525	0	525	0	520	0	525	0	525	0	525	0	535	0	525	0	525	0	525	0	525	0
0.3906	0	525	0	525	0	525	0	525	0	530	0	525	0	530	0	525	0	525	0	525	0	525	0	530	0	530	0	525	0	525	0	520	0	525	0	525	0	525	0	535	0	525	0	525	0	525	0	525	0
0.4006	0	525	0	525	0	525	0	525	0	530	0	525	0	530	0	525	0	525	0	525	0	525	0	530	0	530	0	525	0	525	0	520	0	525	0	525	0	525	0	535	0	525	0	525	0	525	0	525	0
0.4106	0	525	0	525	0	525	0	525	0	530	0	525	0	530	0	525	0	525	0	525	0	525	0	530	0	530	0	525	0	525	0	520	0	525	0	525	0	525	0	535	0	525	0	525	0	525	0	525	0
0.4207	0	525	0	525	0	525	0	525	0	530	0	525	0	530	0	525	0	525	0	525	0	525	0	530	0	530	0	525	0	525	0	520	0	525	0	525	0	525	0	535	0	525	0	525	0	525	0	525	0
0.4307	0	525	0	525	0	525	0	525	0	530	0	525	0	530	0	525	0	525	0	525	0	525	0	530	0	530	0	525	0	525	0	520	0	525	0	525	0	525	0	535	0	525	0	525	0	525	0	525	0
0.4407	0	525	0	525	0	525	0	525	0	530	0	525	0	530	0	525	0	525	0	525	0	525	0	530	0	530	0	525	0	525	0	520	0	525	0	525	0	525	0	535	0	525	0	525	0	525	0	525	0
0.4507	0	525	0	525	0	525	0	525	0	530	0	525	0	530	0	525	0	525	0	525	0	525	0	530	0	530	0	525	0	525	0	520	0	525	0	525	0	525	0	535	0	525	0	525	0	525	0	525	0
0.4607	0	525	0	525	0	525	0	525	0	530	0	525	0	530	0	525	0	525	0	525	0	525	0	530	0	530	0	525	0	525	0	520	0	525	0	525	0	525	0	535	0	525	0	525	0	525	0	525	0
0.4707	0	525	0	525	0	525	0	525	0	530	0	525	0	530	0	525	0	525	0	525	0	525	0	530	0	530	0	525	0	525	0	520	0	525	0	525	0	525	0	535	0	525	0	525	0	525	0	525	0
0.4807	0	525	0	525	0	525	0	525	0	530	0	525	0	530	0	525	0	525	0	525	0	525	0	530	0	530	0	525	0	525	0	520	0	525	0	525	0	525	0	535	0	525	0	525	0	525	0	525	0
0.4908	0	525	0	525	0	525	0	525	0	530	0	525	0	530	0	525	0	525	0	525	0	525	0	530	0	530	0	525	0	525	0	520	0	525	0	525	0	525	0	535	0	525	0	525	0	525	0	525	0
0.5008	0	525	0	525	0	525	0	525	0	530	0	525	0	530	0	525	0	525	0	525	0	525	0	530	0	530	0	525	0	525	0	520	0	525	0	525	0	525	0	535	0	525	0	525	0	525	0	525	0
0.5108	0	525	0	525	0	525	0	525	0	530	0	525	0	530	0	525	0	525	0	525	0	525	0	530	0	530	0	525	0	525	0	520	0	525	0	525	0	525	0	535	0	525	0	525	0	525	0	525	0
0.5208	0	525	0	525	0	525	0	525	0	530	0	525	0	530	0	525	0	525	0	525	0	525	0	530	0	530	0	525	0	525	0	520	0	525	0	525	0	525	0	535	0	525	0	525	0	525	0	525	0
0.5308	0	525	0	525	0	525	0	525	0	530	0	525	0	530	0	525	0	525	0	525	0	525	0	530	0	530	0	525	0	525	0	520	0	525	0	525	0	525	0	535	0	525	0	525	0	525	0	525	0
0.5408	0	525	0	525	0	525	0	525	0	530	0	525	0	530	0	525	0	525	0	525	0	525	0	530	0	530	0	525	0	525	0	520	0	525	0	525	0	525	0	535	0	525	0	525	0	525	0	525	0
0.5509	0	525	0	525	0	525	0	525	0	530	0	525	0	530	0	525	0	525	0	525	0	525	0	530	0	530	0	525	0	525	0	520	0	525	0	525	0	525	0	535	0	525	0	525	0	525	0	525	0
0.5609	0	525	0	525	0	525	0	525	0	530	0	525	0	530	0	525	0	525	0	525	0	525	0	530	0	530	0	525	0	525	0	520	0	525	0	525	0	525	0	535	0	525	0	525	0	525	0	525	0
0.5709	0	525	0	525	0	525	0	525	0	530	0	525	0	530	0	525	0	525	0	525	0	525	0	530	0	530	0	525	0	525	0	520	0	525	0	525	0	525	0	535	0	525	0	525	0	525	0	525	0
0.5809	0	525	0	525	0	525	0	525	0	530	0	525	0	530	0	525	0	525	0	525	0	525	0	530	0	530	0	525	0	525	0	520	0	525	0	525	0	525	0	535	0	525	0	525	0	525	0	525	0
0.5909	0	525	0	525	0	525	0	525	0	530	0	525	0	530	0	525	0	525	0	525	0	525	0	530	0	530	0	525	0	525	0	520	0	525	0	525	0	525	0	535	0	525	0	525	0	525	0	525	0
0.6009	0	525	0	525	0	525	0	525	0	530	0	525	0	530	0	525	0	525	0	525	0	525	0	530	0	530	0	525	0	525	0	520	0	525	0	525	0	525	0	535	0	525	0	525	0	525	0	525	0
0.6109	0	525	0	525	0	525	0	525	0	530	0	525	0	530	0	525	0	525	0	525	0	525	0	530	0	530	0	525	0	525	0	520	0	525	0	525	0	525	0	535	0	525	0	525	0	525	0	525	0
0.621	0	525	0	525	0	525	0	525	0	530	0	525	0	530	0	525	0	525	0	525	0	525	0	530	0	530	0	525	0	525	0	520	0	525	0	525	0	525	0	535	0	525	0	525	0	525	0	525	0
0.631	0	525	0	525	0	525	0	525	0	530	0	525	0	530	0	525	0	525	0	525	0	525	0	530	0	530	0	525	0	525	0	520	0	525	0	525	0	525	0	535	0	525	0	525	0	525	0	525	0
0.641	0	525	0	525	0	525	0	525	0	530	0	525	0	530	0	525	0	525	0	525	0	525	0	530	0	530	0	525	0	525	0	520	0	525	0	525	0	525	0	535	0	525	0	525	0	525	0	525	0
0.651	0	525	0	525	0	525	0	525	0	530	0	525	0	530	0	525	0	525	0	525	0	525	0	530	0	530	0	525	0	525	0	520	0	525	0	525	0	525	0	535	0	525	0	525	0	525	0	525	0
0.661	0	525	0	525	0	525	0	525	0	530	0	525	0	530	0	525	0	525	0	525	0	525	0	530	0	530	0	525	0	525	0	520	0	525	0	525	0	525	0	535	0	525	0	525	0	525	0	525	0
0.671	0	525	0	525	0	525	0	525	0	530	0	525	0	530	0	525	0	525	0	525	0	525	0	530	0	530	0	525	0	525	0	520	0	525	0	525	0	525	0	535	0	525	0	525	0	525	0	525	0
0.6811	0	525	0	525	0	525	0	525	0	530	0	525	0	530	0	525	0	525	0	525	0	525	0	530	0	530	0	525	0	525	0	520	0	525	0	525	0	525	0	535	0	525	0	525	0	525	0	525	0
0.6911	0	525	0	525	0	525	0	525	0	530	0	525	0	530	0	525	0	525	0	525	0	525	0	530	0	530	0	525	0	525	0	520	0	525	0	525	0	525	0	535	0	525	0	525	0	525	0	525	0
0.7011	0	525	0	525	0	525	0	525	0	530	0	525	0	530	0	525	0	525	0	525	0	525	0	530	0	530	0	525	0	525	0	520	0	525	0	525	0	525	0	535	0	525	0	525	0	525	0	525	0
0.7111	0	525	0	525	0	525	0	525	0	530	0	525	0	530	0	525	0	525	0	525	0	525	0	530	0	530	0	525	0	525	0	520	0	525	0	525	0	525	0	535	0	525	0	525	0	525	0	525	0
0.7211	0	525	0	525	0	525	0	525	0	530	0	525	0	530	0	525	0	525	0	525	0	525	0	530	0	530	0	525	0	525	0	520	0	525	0	525	0	525	0	535	0	525	0	525	0	525	0	525	0
0.7311	0	525	0	525	0	525	0	525	0	530	0	525	0	530	0	525	0	525	0	525	0	525	0	530	0	530	0	525	0	525	0	520	0	525	0	525	0	525	0	535	0	525	0	525	0	525	0	525	0
0.7412	0	525	0	525	0	525	0	525	0	530	0	525	0	530	0	525	0	525	0	525	0	525	0	530	0	530	0	525	0	525	0	520	0	525	0	525	0	525	0	535	0	525	0	525	0	525	0	525	0
0.7512	0	525	0	525	0	525	0	525	0	530	0	525	0	530	0	525	0	525	0	525	0	525	0	530	0	530	0	525	0	525	0	520	0	525	0	525	0	525	0	535	0	525	0	525	0	525	0	525	0
0.7612	0	525	0	525	0	525	0	525	0	530	0	525	0	530	0	525	0	525	0	525	0	525	0	530	0	530	0	525	0	525	0	520	0	525	0	525	0	525	0	535	0	525	0	525	0	525	0	525	0
0.7712	0	525	0	525	0	525	0	525	0	530	0	525	0	530	0	525	0	525	0	525	0	525	0	530	0	530	0	525	0	525	0	520	0	525	0	525	0	525	0	535	0	525	0	525	0	525	0	525	0
0.7812	0	525	0	525	0	525	0	525	0	530	0	525	0	530	0	525	0	525	0	525	0	525	0	530	0	530	0	525	0	525	0	520	0	525	0	525	0	525	0	535	0	525	0	525	0	525	0	525	0
0.7912	0	525	0	525	0	525	0	525	0	530	0	525	0	530	0	525	0	525	0	525	0	525	0	530	0	530	0	525	0	525	0	520	0	525	0	525	0	525	0	535	0	525	0	525	0	525	0	525	0
0.8012	0	525	0	525	0	525	0	525	0	530	0	525	0	530	0	525	0	525	0	525	0	525	0	530	0	530	0	525	0	525	0	520	0	525	0	525	0	525	0	535	0	525	0	525	0	525	0	525	0
0.8113	0	525	0	525	0	525	0	525	0	530	0	525	0	530	0	525	0	525	0	525	0	525	0	530	0	530	0	525	0	525	0	520	0	525	0	525	0	525	0	535	0	525	0	525	0	525	0	525	0
0.8213	0	525	0	525	0	525	0	525	0	530	0	525	0	530	0	525	0	525	0	525	0	525	0	530	0	530	0	525	0	525	0	520	0	525	0	525	0	525	0	535	0	525	0	525	0	525	0	525	0
0.8313	0	525	0	525	0	525	0	525	0	530	0	525	0	530	0	525	0	525	0	525	0	525	0	530	0	530	0	525	0	525	0	520	0	525	0	525	0	525	0	535	0	525	0	525	0	525	0	525	0
0.8413	0	525	0	525	0	525	0	525	0	530	0	525	0	530	0	525	0	525	0	525	0	525	0	530	0	530	0	525	0	525	0	520	0	525	0	525	0	525	0	535	0	525	0	525	0	525	0	525	0
0.8513	0	525	0	525	0	525	0	525	0	530	0	525	0	530	0	525	0	525	0	525	0	525	0	530	0	530	0	525	0	525	0	520	0	525	0	525	0	525	0	535	0	525	0	525	0	525	0	525	0
0.8613	0	525	0	525	0	525	0	525	0	530	0	525	0	530	0	525	0	525	0	525	0	525	0	530	0	530	0	525	0	525	0	520	0	525	0	525	0	525	0	535	0	525	0	525	0	525	0	525	0
0.8714	0	525	0	525	0	525	0	525	0	530	0	525	0	530	0	525	0	525	0	525	0	525	0	530	0	530	0	525	0	525	0	520	0	525	0	525	0	525	0	535	0	525	0	525	0	525	0	525	0
0.8814	0	525	0	525	0	525	0	525	0	530	0	525	0	530	0	525	0	525	0	525	0	525	0	530	0	530	0	525	0	525	0	520	0	525	0	525	0	525	0	535	0	525	0	525	0	525	0	525	0
0.8914	0	525	0	525	0	525	0	525	0	530	0	525	0	530	0	525	0	525	0	525	0	525	0	530	0	530	0	525	0	525	0	520	0	525	0	525	0	525	0	535	0	525	0	525	0	525	0	525	0
0.9014	0	525	0	525	0	525	0	525	0	530	0	525	0	530	0	525	0	525	0	525	0	525	0	530	0	530	0	525	0	525	0	520	0	525	0	525	0	525	0	535	0	525	0	525	0	525	0	525	0
0.9114	0	525	0	525	0	525	0	525	0	530	0	525	0	530	0	525	0	525	0	525	0	525	0	530	0	530	0	525	0	525	0	520	0	525	0	525	0	525	0	535	0	525	0	525	0	525	0	525	0
0.9214	0	525	0	525	0	525	0	525	0	530	0	525	0	530	0	525	0	525	0	525	0	525	0	530	0	530	0	525	0	525	0	520	0	525	0	525	0	525	0	535	0	525	0	525	0	525	0	525	0
0.9314	0	525	0	525	0	525	0	525	0	530	0	525	0	530	0	525	0	525	0	525	0	525	0	530	0	530	0	525	0	525	0	520	0	525	0	525	0	525	0	535	0	525	0	525	0	525	0	525	0
0.9415	0	525	0	525	0	525	0	525	0	530	0	525	0	530	0	525	0	525	0	525	0	525	0	530	0	530	0	525	0	525	0	520	0	525	0	525	0	525	0	535	0	525	0	525	0	525	0	525	0
0.9515	0	525	0	525	0	525	0	525	0	530	0	525	0	530	0	525	0	525	0	525	0	525	0	530	0	530	0	525	0	525	0	520	0	525	0	525	0	525	0	535	0	525	0	525	0	525	0	525	0
0.9615	0	525	0	525	0	525	0	525	0	530	0	525	0	530	0	525	0	525	0	525	0	525	0	530	0	530	0	525	0	525	0	520	0	525	0	525	0	525	0	535	0	525	0	525	0	525	0	525	0
0.9715	0	525	0	525	0	525	0	525	0	530	0	525	0	530	0	525	0	525	0	525	0	525	0	530	0	530	0	525	0	525	0	520	0	525	0	525	0	525	0	535	0	525	0	525	0	525	0	525	0
0.9815	0	525	0	525	0	525	0	525	0	530	0	525	0	530	0	525	0	525	0	525	0	525	0	530	0	530	0	525	0	525	0	520	0	525	0	525	0	525	0	535	0	525	0	525	0	525	0	525	0
0.9915	0	525	0	525	0	525	0	525	0	530	0	525	0	530	0	525	0	525	0	525	0	525	0	530	0	530	0	525	0	525	0	520	0	525	0	525	0	525	0	535	0	525	0	525	0	525	0	525	0
1.0016	0	525	0	525	0	525	0	525	0	530	0	525	0	530	0	525	0	525	0	525	0	525	0	530	0	530	0	525	0	525	0	520	0	525	0	525	0	525	0	535	0	525	0	525	0	525	0	525	0
1.0116	0	525	0	525	0	525	0	525	0	530	0	525	0	530	0	525	0	525	0	525	0	525	0	530	0	530	0	525	0	525	0	520	0	525	0	525	0	525	0	535	0	525	0	525	0	525	0	525	0
1.0216	0	525	0	525	0	525	0	525	0	530	0	525	0	530	0	525	0	525	0	525	0	525	0	530	0	530	0	525	0	525	0	520	0	525	0	525	0	525	0	535	0	525	0	525	0	525	0	525	0
1.0316	0	525	0	525	0	525	0	525	0	530	0	525	0	530	0	525	0	525	0	525	0	525	0	530	0	530	0	525	0	525	0	520	0	525	0	525	0	525	0	535	0	525	0	525	0	525	0	525	0
1.0416	0	525	0	525	0	525	0	525	0	530	0	525	0	530	0	525	0	525	0	525	0	525	0	530	0	530	0	525	0	525	0	520	0	525	0	525	0	525	0	535	0	525	0	525	0	525	0	525	0
1.0516	0	525	0	525	0	525	0	525	0	530	0	525	0	530	0	525	0	525	0	525	0	525	0	530	0	530	0	525	0	525	0	520	0	525	0	525	0	525	0	535	0	525	0	525	0	525	0	525	0
1.0616	0	525	0	525	0	525	0	525	0	530	0	525	0	530	0	525	0	525	0	525	0	525	0	530	0	530	0	525	0	525	0	520	0	525	0	525	0	525	0	535	0	525	0	525	0	525	0	525	0
1.0717	0	525	0	525	0	525	0	525	0	530	0	525	0	530	0	525	0	525	0	525	0	525	0	530	0	530	0	525	0	525	0	520	0	525	0	525	0	525	0	535	0	525	0	525	0	525	0	525	0
1.0817	0	525	0	525	0	525	0	525	0	530	0	525	0	530	0	525	0	525	0	525	0	525	0	530	0	530	0	525	0	525	0	520	0	525	0	525	0	525	0	535	0	525	0	525	0	525	0	525	0
1.0917	0	525	0	525	0	525	0	525	0	530	0	525	0	530	0	525	0	525	0	525	0	525	0	530	0	530	0	525	0	525	0	520	0	525	0	525	0	525	0	535	0	525	0	525	0	525	0	525	0
1.1017	0	525	0	525	0	525	0	525	0	530	0	525	0	530	0	525	0	525	0	525	0	525	0	530	0	530	0	525	0	525	0	520	0	525	0	525	0	525	0	535	0	525	0	525	0	525	0	525	0
1.1117	0	525	0	525	0	525	0	525	0	530	0	525	0	530	0	525	0	525	0	525	0	525	0	530	0	530	0	525	0	525	0	520	0	525	0	525	0	525	0	535	0	525	0	525	0	525	0	525	0
1.1217	0	525	0	525	0	525	0	525	0	530	0	525	0	530	0	525	0	525	0	525	0	525	0	530	0	530	0	525	0	525	0	520	0	525	0	525	0	525	0	535	0	525	0	525	0	525	0	525	0
1.1318	0	525	0	525	0	525	0	525	0	530	0	525	0	530	0	525	0	525	0	525	0	525	0	530	0	530	0	525	0	525	0	520	0	525	0	525	0	525	0	535	0	525	0	525	0	525	0	525	0
1.1418	0	525	0	525	0	525	0	525	0	530	0	525	0	530	0	525	0	525	0	525	0	525	0	530	0	530	0	525	0	525	0	520	0	525	0	525	0	525	0	535	0	525	0	525	0	525	0	525	0
1.1518	0	525	0	525	0	525	0	525	0	530	0	525	0	530	0	525	0	525	0	525	0	525	0	530	0	530	0	525	0	525	0	520	0	525	0	525	0	525	0	535	0	525	0	525	0	525	0	525	0
1.1618	0	525	0	525	0	525	0	525	0	530	0	525	0	530	0	525	0	525	0	525	0	525	0	530	0	530	0	525	0	525	0	520	0	525	0	525	0	525	0	535	0	525	0	525	0	525	0	525	0
1.1718	0	525	0	525	0	525	0	525	0	530	0	525	0	530	0	525	0	525	0	525	0	525	0	530	0	530	0	525	0	525	0	520	0	525	0	525	0	525	0	535	0	525	0	525	0	525	0	525	0
1.1818	0	525	0	525	0	525	0	525	0	530	0	525	0	530	0	525	0	525	0	525	0	525	0	530	0	530	0	525	0	525	0	520	0	525	0	525	0	525	0	535	0	525	0	525	0	525	0	525	0
1.1919	0	525	0	525	0	525	0	525	0	530	0	525	0	530	0	525	0	525	0	525	0	525	0	530	0	530	0	525	0	525	0	520	0	525	0	525	0	525	0	535	0	525	0	525	0	525	0	525	0
1.2019	0	525	0	525	0	525	0	525	0	530	0	525	0	530	0	525	0	525	0	525	0	525	0	530	0	530	0	525	0	525	0	520	0	525	0	525	0	525	0	535	0	525	0	525	0	525	0	525	0
1.2119	0	525	0	525	0	525	0	525	0	530	0	525	0	530	0	525	0	525	0	525	0	525	0	530	0	530	0	525	0	525	0	520	0	525	0	525	0	525	0	535	0	525	0	525	0	525	0	525	0
1.2219	0	525	0	525	0	525	0	525	0	530	0	525	0	530	0	525	0	525	0	525	0	525	0	530	0	530	0	525	0	525	0	520	0	525	0	525	0	525	0	535	0	525	0	525	0	525	0	525	0
1.2319	0	525	0	525	0	525	0	525	0	530	0	525	0	530	0	525	0	525	0	525	0	525	0	530	0	530	0	525	0	525	0	520	0	525	0	525	0	525	0	535	0	525	0	525	0	525	0	525	0
1.2419	0	525	0	525	0	525	0	525	0	530	0	525	0	530	0	525	0	525	0	525	0	525	0	530	0	530	0	525	0	525	0	520	0	525	0	525	0	525	0	535	0	525	0	525	0	525	0	525	0
1.2519	0	525	0	525	0	525	0	525	0	530	0	525	0	530	0	525	0	525	0	525	0	525	0	530	0	530	0	525	0	525	0	520	0	525	0	525	0	525	0	535	0	525	0	525	0	525	0	525	0
1.262	0	525	0	525	0	525	0	525	0	530	0	525	0	530	0	525	0	525	0	525	0	525	0	530	0	530	0	525	0	525	0	520	0	525	0	525	0	525	0	535	0	525	0	525	0	525	0	525	0
1.272	0	525	0	525	0	525	0	525	0	530	0	525	0	530	0	525	0	525	0	525	0	525	0	530	0	530	0	525	0	525	0	520	0	525	0	525	0	525	0	535	0	525	0	525	0	525	0	525	0
1.282	0	525	0	525	0	525	0	525	0	530	0	525	0	530	0	525	0	525	0	525	0	525	0	530	0	530	0	525	0	525	0	520	0	525	0	525	0	525	0	535	0	525	0	525	0	525	0	525	0
1.292	0	525	0	525	0	525	0	525	0	530	0	525	0	530	0	525	0	525	0	525	0	525	0	530	0	530	0	525	0	525	0	520	0	525	0	525	0	525	0	535	0	525	0	525	0	525	0	525	0
1.302	0	525	0	525	0	525	0	525	0	530	0	525	0	530	0	525	0	525	0	525	0	525	0	530	0	530	0	525	0	525	0	520	0	525	0	525	0	525	0	535	0	525	0	525	0	525	0	525	0
1.312	0	525	0	525	0	525	0	525	0	530	0	525	0	530	0	525	0	525	0	525	0	525	0	530	0	530	0	525	0	525	0	520	0	525	0	525	0	525	0	535	0	525	0	525	0	525	0	525	0
1.3221	0	525	0	525	0	525	0	525	0	530	0	525	0	530	0	525	0	525	0	525	0	525	0	530	0	530	0	525	0	525	0	520	0	525	0	525	0	525	0	535	0	525	0	525	0	525	0	525	0
1.3321	0	525	0	525	0	525	0	525	0	530	0	525	0	530	0	525	0	525	0	525	0	525	0	530	0	530	0	525	0	525	0	520	0	525	0	525	0	525	0	535	0	525	0	525	0	525	0	525	0
1.3421	0	525	0	525	0	525	0	525	0	530	0	525	0	530	0	525	0	525	0	525	0	525	0	530	0	530	0	525	0	525	0	520	0	525	0	525	0	525	0	535	0	525	0	525	0	525	0	525	0
1.3521	0	525	0	525	0	525	0	525	0	530	0	525	0	530	0	525	0	525	0	525	0	525	0	530	0	530	0	525	0	525	0	520	0	525	0	525	0	525	0	535	0	525	0	525	0	525	0	525	0
1.3621	0	525	0	525	0	525	0	525	0	530	0	525	0	530	0	525	0	525	0	525	0	525	0	530	0	530	0	525	0	525	0	520	0	525	0	525	0	525	0	535	0	525	0	525	0	525	0	525	0
1.3721	0	525	0	525	0	525	0	525	0	530	0	525	0	530	0	525	0	525	0	525	0	525	0	530	0	530	0	525	0	525	0	520	0	525	0	525	0	525	0	535	0	525	0	525	0	525	0	525	0
1.3821	0	525	0	525	0	525	0	525	0	530	0	525	0	530	0	525	0	525	0	525	0	525	0	530	0	530	0	525	0	525	0	520	0	525	0	525	0	525	0	535	0	525	0	525	0	525	0	525	0
1.3922	0	525	0	525	0	525	0	525	0	530	0	525	0	530	0	525	0	525	0	525	0	525	0	530	0	530	0	525	0	525	0	520	0	525	0	525	0	525	0	535	0	525	0	525	0	525	0	525	0
1.4022	0	525	0	525	0	525	0	525	0	530	0	525	0	530	0	525	0	525	0	525	0	525	0	530	0	530	0	525	0	525	0	520	0	525	0	525	0	525	0	535	0	525	0	525	0	525	0	525	0
1.4122	0	525	0	525	0	525	0	525	0	530	0	525	0	530	0	525	0	525	0	525	0	525	0	530	0	530	0	525	0	525	0	520	0	525	0	525	0	525	0	535	0	525	0	525	0	525	0	525	0
1.4222	0	525	0	525	0	525	0	525	0	530	0	525	0	530	0	525	0	525	0	525	0	525	0	530	0	530	0	525	0	525	0	520	0	525	0	525	0	525	0	535	0	525	0	525	0	525	0	525	0
1.4322	0	525	0	525	0	525	0	525	0	530	0	525	0	530	0	525	0	525	0	525	0	525	0	530	0	530	0	525	0	525	0	520	0	525	0	525	0	525	0	535	0	525	0	525	0	525	0	525	0
1.4422	0	525	0	525	0	525	0	525	0	530	0	525	0	530	0	525	0	525	0	525	0	525	0	530	0	530	0	525	0	525	0	520	0	525	0	525	0	525	0	535	0	525	0	525	0	525	0	525	0
1.4523	0	525	0	525	0	525	0	525	0	530	0	525	0	530	0	525	0	525	0	525	0	525	0	530	0	530	0	525	0	525	0	520	0	525	0	525	0	525	0	535	0	525	0	525	0	525	0	525	0
1.4623	0	525	0	525	0	525	0	525	0	530	0	525	0	530	0	525	0	525	0	525	0	525	0	530	0	530	0	525	0	525	0	520	0	525	0	525	0	525	0	535	0	525	0	525	0	525	0	525	0
1.4723	0	525	0	525	0	525	0	525	0	530	0	525	0	530	0	525	0	525	0	525	0	525	0	530	0	530	0	525	0	525	0	520	0	525	0	525	0	525	0	535	0	525	0	525	0	525	0	525	0
1.4823	0	525	0	525	0	525	0	525	0	530	0	525	0	530	0	525	0	525	0	525	0	525	0	530	0	530	0	525	0	525	0	520	0	525	0	525	0	525	0	535	0	525	0	525	0	525	0	525	0
1.4923	0	525	0	525	0	525	0	525	0	530	0	525	0	530	0	525	0	525	0	525	0	525	0	530	0	530	0	525	0	525	0	520	0	525	0	525	0	525	0	535	0	525	0	525	0	525	0	525	0
1.5023	0	525	0	525	0	525	0	525	0	530	0	525	0	530	0	525	0	525	0	525	0	525	0	530	0	530	0	525	0	525	0	520	0	525	0	525	0	525	0	535	0	525	0	525	0	525	0	525	0
1.5123	0	525	0	525	0	525	0	525	0	530	0	525	0	530	0	525	0	525	0	525	0	525	0	530	0	530	0	525	0	525	0	520	0	525	0	525	0	525	0	535	0	525	0	525	0	525	0	525	0
1.5224	0	525	0	525	0	525	0	525	0	530	0	525	0	530	0	525	0	525	0	525	0	525	0	530	0	530	0	525	0	525	0	520	0	525	0	525	0	525	0	535	0	525	0	525	0	525	0	525	0
1.5324	0	525	0	525	0	525	0	525	0	530	0	525	0	530	0	525	0	525	0	525	0	525	0	530	0	530	0	525	0	525	0	520	0	525	0	525	0	525	0	535	0	525	0	525	0	525	0	525	0
1.5424	0	525	0	525	0	525	0	525	0	530	0	525	0	530	0	525	0	525	0	525	0	525	0	530	0	530	0	525	0	525	0	520	0	525	0	525	0	525	0	535	0	525	0	525	0	525	0	525	0
1.5524	0	525	0	525	0	525	0	525	0	530	0	525	0	530	0	525	0	525	0	525	0	525	0	530	0	530	0	525	0	525	0	520	0	525	0	525	0	525	0	535	0	525	0	525	0	525	0	525	0
1.5624	0	525	0	525	0	525	0	525	0	530	0	525	0	530	0	525	0	525	0	525	0	525	0	530	0	530	0	525	0	525	0	520	0	525	0	525	0	525	0	535	0	525	0	525	0	525	0	525	0
1.5724	0	525	0	525	0	525	0	525	0	530	0	525	0	530	0	525	0	525	0	525	0	525	0	530	0	530	0	525	0	525	0	520	0	525	0	525	0	525	0	535	0	525	0	525	0	525	0	525	0
1.5825	0	525	0	525	0	525	0	525	0	530	0	525	0	530	0	525	0	525	0	525	0	525	0	530	0	530	0	525	0	525	0	520	0	525	0	525	0	525	0	535	0	525	0	525	0	525	0	525	0
1.5925	0	525	0	525	0	525	0	525	0	530	0	525	0	530	0	525	0	525	0	525	0	525	0	530	0	530	0	525	0	525	0	520	0	525	0	525	0	525	0	535	0	525	0	525	0	525	0	525	0
1.6025	0	525	0	525	0	525	0	525	0	530	0	525	0	530	0	525	0	525	0	525	0	525	0	530	0	530	0	525	0	525	0	520	0	525	0	525	0	525	0	535	0	525	0	525	0	525	0	525	0
1.6125	0	525	0	525	0	525	0	525	0	530	0	525	0	530	0	525	0	525	0	525	0	525	0	530	0	530	0	525	0	525	0	520	0	525	0	525	0	525	0	535	0	525	0	525	0	525	0	525	0
1.6225	0	525	0	525	0	525	0	525	0	530	0	525	0	530	0	525	0	525	0	525	0	525	0	530	0	530	0	525	0	525	0	520	0	525	0	525	0	525	0	535	0	525	0	525	0	525	0	525	0
1.6325	0	525	0	525	0	525	0	525	0	530	0	525	0	530	0	525	0	525	0	525	0	525	0	530	0	530	0	525	0	525	0	520	0	525	0	525	0	525	0	535	0	525	0	525	0	525	0	525	0
1.6425	0	525	0	525	0	525	0	525	0	530	0	525	0	530	0	525	0	525	0	525	0	525	0	530	0	530	0	525	0	525	0	520	0	525	0	525	0	525	0	535	0	525	0	525	0	525	0	525	0
1.6526	0	525	0	525	0	525	0	525	0	530	0	525	0	530	0	525	0	525	0	525	0	525	0	530	0	530	0	525	0	525	0	520	0	525	0	525	0	525	0	535	0	525	0	525	0	525	0	525	0
1.6626	0	525	0	525	0	525	0	525	0	530	0	525	0	530	0	525	0	525	0	525	0	525	0	530	0	530	0	525	0	525	0	520	0	525	0	525	0	525	0	535	0	525	0	525	0	525	0	525	0
1.6726	0	525	0	525	0	525	0	525	0	530	0	525	0	530	0	525	0	525	0	525	0	525	0	530	0	530	0	525	0	525	0	520	0	525	0	525	0	525	0	535	0	525	0	525	0	525	0	525	0
1.6826	0	525	0	525	0	525	0	525	0	530	0	525	0	530	0	525	0	525	0	525	0	525	0	530	0	530	0	525	0	525	0	520	0	525	0	525	0	525	0	535	0	525	0	525	0	525	0	525	0
1.6926	0	525	0	525	0	525	0	525	0	530	0	525	0	530	0	525	0	525	0	525	0	525	0	530	0	530	0	525	0	525	0	520	0	525	0	525	0	525	0	535	0	525	0	525	0	525	0	525	0
1.7026	0	525	0	525	0	525	0	525	0	530	0	525	0	530	0	525	0	525	0	525	0	525	0	530	0	530	0	525	0	525	0	520	0	525	0	525	0	525	0	535	0	525	0	525	0	525	0	525	0
1.7127	0	525	0	525	0	525	0	525	0	530	0	525	0	530	0	525	0	525	0	525	0	525	0	530	0	530	0	525	0	525	0	520	0	525	0	525	0	525	0	535	0	525	0	525	0	525	0	525	0
1.7227	0	525	0	525	0	525	0	525	0	530	0	525	0	530	0	525	0	525	0	525	0	525	0	530	0	530	0	525	0	525	0	520	0	525	0	525	0	525	0	535	0	525	0	525	0	525	0	525	0
1.7327	0	525	0	525	0	525	0	525	0	530	0	525	0	530	0	525	0	525	0	525	0	525	0	530	0	530	0	525	0	525	0	520	0	525	0	525	0	525	0	535	0	525	0	525	0	525	0	525	0
1.7427	0	525	0	525	0	525	0	525	0	530	0	525	0	530	0	525	0	525	0	525	0	525	0	530	0	530	0	525	0	525	0	520	0	525	0	525	0	525	0	535	0	525	0	525	0	525	0	525	0
1.7527	0	525	0	525	0	525	0	525	0	530	0	525	0	530	0	525	0	525	0	525	0	525	0	530	0	530	0	525	0	525	0	520	0	525	0	525	0	525	0	535	0	525	0	525	0	525	0	525	0
1.7627	0	525	0	525	0	525	0	525	0	530	0	525	0	530	0	525	0	525	0	525	0	525	0	530	0	530	0	525	0	525	0	520	0	525	0	525	0	525	0	535	0	525	0	525	0	525	0	525	0
1.7728	0	525	0	525	0	525	0	525	0	530	0	525	0	530	0	525	0	525	0	525	0	525	0	530	0	530	0	525	0	525	0	520	0	525	0	525	0	525	0	535	0	525	0	525	0	525	0	525	0
1.7828	0	525	0	525	0	525	0	525	0	530	0	525	0	530	0	525	0	525	0	525	0	525	0	530	0	530	0	525	0	525	0	520	0	525	0	525	0	525	0	535	0	525	0	525	0	525	0	525	0
1.7928	0	525	0	525	0	525	0	525	0	530	0	525	0	530	0	525	0	525	0	525	0	525	0	530	0	530	0	525	0	525	0	520	0	525	0	525	0	525	0	535	0	525	0	525	0	525	0	525	0
1.8028	0	525	0	525	0	525	0	525	0	530	0	525	0	530	0	525	0	525	0	525	0	525	0	530	0	530	0	525	0	525	0	520	0	525	0	525	0	525	0	535	0	525	0	525	0	525	0	525	0
1.8128	0	525	0	525	0	525	0	525	0	530	0	525	0	530	0	525	0	525	0	525	0	525	0	530	0	530	0	525	0	525	0	520	0	525	0	525	0	525	0	535	0	525	0	525	0	525	0	525	0
1.8228	0	525	0	525	0	525	0	525	0	530	0	525	0	530	0	525	0	525	0	525	0	525	0	530	0	530	0	525	0	525	0	520	0	525	0	525	0	525	0	535	0	525	0	525	0	525	0	525	0
1.8328	0	525	0	525	0	525	0	525	0	530	0	525	0	530	0	525	0	525	0	525	0	525	0	530	0	530	0	525	0	525	0	520	0	525	0	525	0	525	0	535	0	525	0	525	0	525	0	525	0
1.8429	0	525	0	525	0	525	0	525	0	530	0	525	0	530	0	525	0	525	0	525	0	525	0	530	0	530	0	525	0	525	0	520	0	525	0	525	0	525	0	535	0	525	0	525	0	525	0	525	0
1.8529	0	525	0	525	0	525	0	525	0	530	0	525	0	530	0	525	0	525	0	525	0	525	0	530	0	530	0	525	0	525	0	520	0	525	0	525	0	525	0	535	0	525	0	525	0	525	0	525	0
1.8629	0	525	0	525	0	525	0	525	0	530	0	525	0	530	0	525	0	525	0	525	0	525	0	530	0	530	0	525	0	525	0	520	0	525	0	525	0	525	0	535	0	525	0	525	0	525	0	525	0
1.8729	0	525	0	525	0	525	0	525	0	530	0	525	0	530	0	525	0	525	0	525	0	525	0	530	0	530	0	525	0	525	0	520	0	525	0	525	0	525	0	535	0	525	0	525	0	525	0	525	0
1.8829	0	525	0	525	0	525	0	525	0	530	0	525	0	530	0	525	0	525	0	525	0	525	0	530	0	530	0	525	0	525	0	520	0	525	0	525	0	525	0	535	0	525	0	525	0	525	0	525	0
1.8929	0	525	0	525	0	525	0	525	0	530	0	525	0	530	0	525	0	525	0	525	0	525	0	530	0	530	0	525	0	525	0	520	0	525	0	525	0	525	0	535	0	525	0	525	0	525	0	525	0
1.903	0	525	0	525	0	525	0	525	0	530	0	525	0	530	0	525	0	525	0	525	0	525	0	530	0	530	0	525	0	525	0	520	0	525	0	525	0	525	0	535	0	525	0	525	0	525	0	525	0
1.913	0	525	0	525	0	525	0	525	0	530	0	525	0	530	0	525	0	525	0	525	0	525	0	530	0	530	0	525	0	525	0	520	0	525	0	525	0	525	0	535	0	525	0	525	0	525	0	525	0
1.923	0	525	0	525	0	525	0	525	0	530	0	525	0	530	0	525	0	525	0	525	0	525	0	530	0	530	0	525	0	525	0	520	0	525	0	525	0	525	0	535	0	525	0	525	0	525	0	525	0
1.933	0	525	0	525	0	525	0	525	0	530	0	525	0	530	0	525	0	525	0	525	0	525	0	530	0	530	0	525	0	525	0	520	0	525	0	525	0	525	0	535	0	525	0	525	0	525	0	525	0
1.943	0	525	0	525	0	525	0	525	0	530	0	525	0	530	0	525	0	525	0	525	0	525	0	530	0	530	0	525	0	525	0	520	0	525	0	525	0	525	0	535	0	525	0	525	0	525	0	525	0
1.953	0	525	0	525	0	525	0	525	0	530	0	525	0	530	0	525	0	525	0	525	0	525	0	530	0	530	0	525	0	525	0	520	0	525	0	525	0	525	0	535	0	525	0	525	0	525	0	525	0
1.963	0	525	0	525	0	525	0	525	0	530	0	525	0	530	0	525	0	525	0	525	0	525	0	530	0	530	0	525	0	525	0	520	0	525	0	525	0	525	0	535	0	525	0	525	0	525	0	525	0
1.9731	0	525	0	525	0	525	0	525	0	530	0	525	0	530	0	525	0	525	0	525	0	525	0	530	0	530	0	525	0	525	0	520	0	525	0	525	0	525	0	535	0	525	0	525	0	525	0	525	0
1.9831	0	525	0	525	0	525	0	525	0	530	0	525	0	530	0	525	0	525	0	525	0	525	0	530	0	530	0	525	0	525	0	520	0	525	0	525	0	525	0	535	0	525	0	525	0	525	0	525	0
1.9931	0	525	0	525	0	525	0	525	0	530	0	525	0	530	0	525	0	525	0	525	0	525	0	530	0	530	0	525	0	525	0	520	0	525	0	525	0	525	0	535	0	525	0	525	0	525	0	525	0
2.0031	0	525	0	525	0	525	0	525	0	530	0	525	0	530	0	525	0	525	0	525	0	525	0	530	0	530	0	525	0	525	0	520	0	525	0	525	0	525	0	535	0	525	0	525	0	525	0	525	0
2.0131	0	525	0	525	0	525	0	525	0	530	0	525	0	530	0	525	0	525	0	525	0	525	0	530	0	530	0	525	0	525	0	520	0	525	0	525	0	525	0	535	0	525	0	525	0	525	0	525	0
2.0231	0	525	0	525	0	525	0	525	0	530	0	525	0	530	0	525	0	525	0	525	0	525	0	530	0	530	0	525	0	525	0	520	0	525	0	525	0	525	0	535	0	525	0	525	0	525	0	525	0
2.0332	0	525	0	525	0	525	0	525	0	530	0	525	0	530	0	525	0	525	0	525	0	525	0	530	0	530	0	525	0	525	0	520	0	525	0	525	0	525	0	535	0	525	0	525	0	525	0	525	0
2.0432	0	525	0	525	0	525	0	525	0	530	0	525	0	530	0	525	0	525	0	525	0	525	0	530	0	530	0	525	0	525	0	520	0	525	0	525	0	525	0	535	0	525	0	525	0	525	0	525	0
2.0532	0	525	0	525	0	525	0	525	0	530	0	525	0	530	0	525	0	525	0	525	0	525	0	530	0	530	0	525	0	525	0	520	0	525	0	525	0	525	0	535	0	525	0	525	0	525	0	525	0
2.0632	0	525	0	525	0	525	0	525	0	530	0	525	0	530	0	525	0	525	0	525	0	525	0	530	0	530	0	525	0	525	0	520	0	525	0	525	0	525	0	535	0	525	0	525	0	525	0	525	0
2.0732	0	525	0	525	0	525	0	525	0	530	0	525	0	530	0	525	0	525	0	525	0	525	0	530	0	530	0	525	0	525	0	520	0	525	0	525	0	525	0	535	0	525	0	525	0	525	0	525	0
2.0832	0	525	0	525	0	525	0	525	0	530	0	525	0	530	0	525	0	525	0	525	0	525	0	530	0	530	0	525	0	525	0	520	0	525	0	525	0	525	0	535	0	525	0	525	0	525	0	525	0
2.0932	0	525	0	525	0	525	0	525	0	530	0	525	0	530	0	525	0	525	0	525	0	525	0	530	0	530	0	525	0	525	0	520	0	525	0	525	0	525	0	535	0	525	0	525	0	525	0	525	0
2.1033	0	525	0	525	0	525	0	525	0	530	0	525	0	530	0	525	0	525	0	525	0	525	0	530	0	530	0	525	0	525	0	520	0	525	0	525	0	525	0	535	0	525	0	525	0	525	0	525	0
2.1133	0	525	0	525	0	525	0	525	0	530	0	525	0	530	0	525	0	525	0	525	0	525	0	530	0	530	0	525	0	525	0	520	0	525	0	525	0	525	0	535	0	525	0	525	0	525	0	525	0
2.1233	0	525	0	525	0	525	0	525	0	530	0	525	0	530	0	525	0	525	0	525	0	525	0	530	0	530	0	525	0	525	0	520	0	525	0	525	0	525	0	535	0	525	0	525	0	525	0	525	0
2.1333	0	525	0	525	0	525	0	525	0	530	0	525	0	530	0	525	0	525	0	525	0	525	0	530	0	530	0	525	0	525	0	520	0	525	0	525	0	525	0	535	0	525	0	525	0	525	0	525	0
2.1433	0	525	0	525	0	525	0	525	0	530	0	525	0	530	0	525	0	525	0	525	0	525	0	530	0	530	0	525	0	525	0	520	0	525	0	525	0	525	0	535	0	525	0	525	0	525	0	525	0
2.1533	0	525	0	525	0	525	0	525	0	530	0	525	0	530	0	525	0	525	0	525	0	525	0	530	0	530	0	525	0	525	0	520	0	525	0	525	0	525	0	535	0	525	0	525	0	525	0	525	0
2.1634	0	525	0	525	0	525	0	525	0	530	0	525	0	530	0	525	0	525	0	525	0	525	0	530	0	530	0	525	0	525	0	520	0	525	0	525	0	525	0	535	0	525	0	525	0	525	0	525	0
2.1734	0	525	0	525	0	525	0	525	0	530	0	525	0	530	0	525	0	525	0	525	0	525	0	530	0	530	0	525	0	525	0	520	0	525	0	525	0	525	0	535	0	525	0	525	0	525	0	525	0
2.1834	0	525	0	525	0	525	0	525	0	530	0	525	0	530	0	525	0	525	0	525	0	525	0	530	0	530	0	525	0	525	0	520	0	525	0	525	0	525	0	535	0	525	0	525	0	525	0	525	0
2.1934	0	525	0	525	0	525	0	525	0	530	0	525	0	530	0	525	0	525	0	525	0	525	0	530	0	530	0	525	0	525	0	520	0	525	0	525	0	525	0	535	0	525	0	525	0	525	0	525	0
2.2034	0	525	0	525	0	525	0	525	0	530	0	525	0	530	0	525	0	525	0	525	0	525	0	530	0	530	0	525	0	525	0	520	0	525	0	525	0	525	0	535	0	525	0	525	0	525	0	525	0
2.2134	0	525	0	525	0	525	0	525	0	530	0	525	0	530	0	525	0	525	0	525	0	525	0	530	0	530	0	525	0	525	0	520	0	525	0	525	0	525	0	535	0	525	0	525	0	525	0	525	0
2.2235	0	525	0	525	0	525	0	525	0	530	0	525	0	530	0	525	0	525	0	525	0	525	0	530	0	530	0	525	0	525	0	520	0	525	0	525	0	525	0	535	0	525	0	525	0	525	0	525	0
2.2335	0	525	0	525	0	525	0	525	0	530	0	525	0	530	0	525	0	525	0	525	0	525	0	530	0	530	0	525	0	525	0	520	0	525	0	525	0	525	0	535	0	525	0	525	0	525	0	525	0
2.2435	0	525	0	525	0	525	0	525	0	530	0	525	0	530	0	525	0	525	0	525	0	525	0	530	0	530	0	525	0	525	0	520	0	525	0	525	0	525	0	535	0	525	0	525	0	525	0	525	0
2.2535	0	525	0	525	0	525	0	525	0	530	0	525	0	530	0	525	0	525	0	525	0	525	0	530	0	530	0	525	0	525	0	520	0	525	0	525	0	525	0	535	0	525	0	525	0	525	0	525	0
2.2635	0	525	0	525	0	525	0	525	0	530	0	525	0	530	0	525	0	525	0	525	0	525	0	530	0	530	0	525	0	525	0	520	0	525	0	525	0	525	0	535	0	525	0	525	0	525	0	525	0
2.2735	0	525	0	525	0	525	0	525	0	530	0	525	0	530	0	525	0	525	0	525	0	525	0	530	0	530	0	525	0	525	0	520	0	525	0	525	0	525	0	535	0	525	0	525	0	525	0	525	0
2.2835	0	525	0	525	0	525	0	525	0	530	0	525	0	530	0	525	0	525	0	525	0	525	0	530	0	530	0	525	0	525	0	520	0	525	0	525	0	525	0	535	0	525	0	525	0	525	0	525	0
2.2936	0	525	0	525	0	525	0	525	0	530	0	525	0	530	0	525	0	525	0	525	0	525	0	530	0	530	0	525	0	525	0	520	0	525	0	525	0	525	0	535	0	525	0	525	0	525	0	525	0
2.3036	0	525	0	525	0	525	0	525	0	530	0	525	0	530	0	525	0	525	0	525	0	525	0	530	0	530	0	525	0	525	0	520	0	525	0	525	0	525	0	535	0	525	0	525	0	525	0	525	0
2.3136	0	525	0	525	0	525	0	525	0	530	0	525	0	530	0	525	0	525	0	525	0	525	0	530	0	530	0	525	0	525	0	520	0	525	0	525	0	525	0	535	0	525	0	525	0	525	0	525	0
2.3236	0	525	0	525	0	525	0	525	0	530	0	525	0	530	0	525	0	525	0	525	0	525	0	530	0	530	0	525	0	525	0	520	0	525	0	525	0	525	0	535	0	525	0	525	0	525	0	525	0
2.3336	0	525	0	525	0	525	0	525	0	530	0	525	0	530	0	525	0	525	0	525	0	525	0	530	0	530	0	525	0	525	0	520	0	525	0	525	0	525	0	535	0	525	0	525	0	525	0	525	0
2.3436	0	525	0	525	0	525	0	525	0	530	0	525	0	530	0	525	0	525	0	525	0	525	0	530	0	530	0	525	0	525	0	520	0	525	0	525	0	525	0	535	0	525	0	525	0	525	0	525	0
2.3537	0	525	0	525	0	525	0	525	0	530	0	525	0	530	0	525	0	525	0	525	0	525	0	530	0	530	0	525	0	525	0	520	0	525	0	525	0	525	0	535	0	525	0	525	0	525	0	525	0
2.3637	0	525	0	525	0	525	0	525	0	530	0	525	0	530	0	525	0	525	0	525	0	525	0	530	0	530	0	525	0	525	0	520	0	525	0	525	0	525	0	535	0	525	0	525	0	525	0	525	0
2.3737	0	525	0	525	0	525	0	525	0	530	0	525	0	530	0	525	0	525	0	525	0	525	0	530	0	530	0	525	0	525	0	520	0	525	0	525	0	525	0	535	0	525	0	525	0	525	0	525	0
2.3837	0	525	0	525	0	525	0	525	0	530	0	525	0	530	0	525	0	525	0	525	0	525	0	530	0	530	0	525	0	525	0	520	0	525	0	525	0	525	0	535	0	525	0	525	0	525	0	525	0
2.3937	0	525	0	525	0	525	0	525	0	530	0	525	0	530	0	525	0	525	0	525	0	525	0	530	0	530	0	525	0	525	0	520	0	525	0	525	0	525	0	535	0	525	0	525	0	525	0	525	0
2.4037	0	525	0	525	0	525	0	525	0	530	0	525	0	530	0	525	0	525	0	525	0	525	0	530	0	530	0	525	0	525	0	520	0	525	0	525	0	525	0	535	0	525	0	525	0	525	0	525	0
2.4137	0	525	0	525	0	525	0	525	0	530	0	525	0	530	0	525	0	525	0	525	0	525	0	530	0	530	0	525	0	525	0	520	0	525	0	525	0	525	0	535	0	525	0	525	0	525	0	525	0
2.4238	0	525	0	525	0	525	0	525	0	530	0	525	0	530	0	525	0	525	0	525	0	525	0	530	0	530	0	525	0	525	0	520	0	525	0	525	0	525	0	535	0	525	0	525	0	525	0	525	0
2.4338	0	525	0	525	0	525	0	525	0	530	0	525	0	530	0	525	0	525	0	525	0	525	0	530	0	530	0	525	0	525	0	520	0	525	0	525	0	525	0	535	0	525	0	525	0	525	0	525	0
2.4438	0	525	0	525	0	525	0	525	0	530	0	525	0	530	0	525	0	525	0	525	0	525	0	530	0	530	0	525	0	525	0	520	0	525	0	525	0	525	0	535	0	525	0	525	0	525	0	525	0
2.4538	0	525	0	525	0	525	0	525	0	530	0	525	0	530	0	525	0	525	0	525	0	525	0	530	0	530	0	525	0	525	0	520	0	525	0	525	0	525	0	535	0	525	0	525	0	525	0	525	0
2.4638	0	525	0	525	0	525	0	525	0	530	0	525	0	530	0	525	0	525	0	525	0	525	0	530	0	530	0	525	0	525	0	520	0	525	0	525	0	525	0	535	0	525	0	525	0	525	0	525	0
2.4738	0	525	0	525	0	525	0	525	0	530	0	525	0	530	0	525	0	525	0	525	0	525	0	530	0	530	0	525	0	525	0	520	0	525	0	525	0	525	0	535	0	525	0	525	0	525	0	525	0
2.4839	0	525	0	525	0	525	0	525	0	530	0	525	0	530	0	525	0	525	0	525	0	525	0	530	0	530	0	525	0	525	0	520	0	525	0	525	0	525	0	535	0	525	0	525	0	525	0	525	0
2.4939	0	525	0	525	0	525	0	525	0	530	0	525	0	530	0	525	0	525	0	525	0	525	0	530	0	530	0	525	0	525	0	520	0	525	0	525	0	525	0	535	0	525	0	525	0	525	0	525	0
2.5039	0	525	0	525	0	525	0	525	0	530	0	525	0	530	0	525	0	525	0	525	0	525	0	530	0	530	0	525	0	525	0	520	0	525	0	525	0	525	0	535	0	525	0	525	0	525	0	525	0
2.5139	0	525	0	525	0	525	0	525	0	530	0	525	0	530	0	525	0	525	0	525	0	525	0	530	0	530	0	525	0	525	0	520	0	525	0	525	0	525	0	535	0	525	0	525	0	525	0	525	0
2.5239	0	525	0	525	0	525	0	525	0	530	0	525	0	530	0	525	0	525	0	525	0	525	0	530	0	530	0	525	0	525	0	520	0	525	0	525	0	525	0	535	0	525	0	525	0	525	0	525	0
2.5339	0	525	0	525	0	525	0	525	0	530	0	525	0	530	0	525	0	525	0	525	0	525	0	530	0	530	0	525	0	525	0	520	0	525	0	525	0	525	0	535	0	525	0	525	0	525	0	525	0
2.5439	0	525	0	525	0	525	0	525	0	530	0	525	0	530	0	525	0	525	0	525	0	525	0	530	0	530	0	525	0	525	0	520	0	525	0	525	0	525	0	535	0	525	0	525	0	525	0	525	0
2.554	0	525	0	525	0	525	0	525	0	530	0	525	0	530	0	525	0	525	0	525	0	525	0	530	0	530	0	525	0	525	0	520	0	525	0	525	0	525	0	535	0	525	0	525	0	525	0	525	0
2.564	0	525	0	525	0	525	0	525	0	530	0	525	0	530	0	525	0	525	0	525	0	525	0	530	0	530	0	525	0	525	0	520	0	525	0	525	0	525	0	535	0	525	0	525	0	525	0	525	0
2.574	0	525	0	525	0	525	0	525	0	530	0	525	0	530	0	525	0	525	0	525	0	525	0	530	0	530	0	525	0	525	0	520	0	525	0	525	0	525	0	535	0	525	0	525	0	525	0	525	0
2.584	0	525	0	525	0	525	0	525	0	530	0	525	0	530	0	525	0	525	0	525	0	525	0	530	0	530	0	525	0	525	0	520	0	525	0	525	0	525	0	535	0	525	0	525	0	525	0	525	0
2.594	0	525	0	525	0	525	0	525	0	530	0	525	0	530	0	525	0	525	0	525	0	525	0	530	0	530	0	525	0	525	0	520	0	525	0	525	0	525	0	535	0	525	0	525	0	525	0	525	0
2.604	0	525	0	525	0	525	0	525	0	530	0	525	0	530	0	525	0	525	0	525	0	525	0	530	0	530	0	525	0	525	0	520	0	525	0	525	0	525	0	535	0	525	0	525	0	525	0	525	0
2.6141	0	525	0	525	0	525	0	525	0	530	0	525	0	530	0	525	0	525	0	525	0	525	0	530	0	530	0	525	0	525	0	520	0	525	0	525	0	525	0	535	0	525	0	525	0	525	0	525	0
2.6241	0	525	0	525	0	525	0	525	0	530	0	525	0	530	0	525	0	525	0	525	0	525	0	530	0	530	0	525	0	525	0	520	0	525	0	525	0	525	0	535	0	525	0	525	0	525	0	525	0
2.6341	0	525	0	525	0	525	0	525	0	530	0	525	0	530	0	525	0	525	0	525	0	525	0	530	0	530	0	525	0	525	0	520	0	525	0	525	0	525	0	535	0	525	0	525	0	525	0	525	0
2.6441	0	525	0	525	0	525	0	525	0	530	0	525	0	530	0	525	0	525	0	525	0	525	0	530	0	530	0	525	0	525	0	520	0	525	0	525	0	525	0	535	0	525	0	525	0	525	0	525	0
2.6541	0	525	0	525	0	525	0	525	0	530	0	525	0	530	0	525	0	525	0	525	0	525	0	530	0	530	0	525	0	525	0	520	0	525	0	525	0	525	0	535	0	525	0	525	0	525	0	525	0
2.6641	0	525	0	525	0	525	0	525	0	530	0	525	0	530	0	525	0	525	0	525	0	525	0	530	0	530	0	525	0	525	0	520	0	525	0	525	0	525	0	535	0	525	0	525	0	525	0	525	0
2.6742	0	525	0	525	0	525	0	525	0	530	0	525	0	530	0	525	0	525	0	525	0	525	0	530	0	530	0	525	0	525	0	520	0	525	0	525	0	525	0	535	0	525	0	525	0	525	0	525	0
2.6842	0	525	0	525	0	525	0	525	0	530	0	525	0	530	0	525	0	525	0	525	0	525	0	530	0	530	0	525	0	525	0	520	0	525	0	525	0	525	0	535	0	525	0	525	0	525	0	525	0
2.6942	0	525	0	525	0	525	0	525	0	530	0	525	0	530	0	525	0	525	0	525	0	525	0	530	0	530	0	525	0	525	0	520	0	525	0	525	0	525	0	535	0	525	0	525	0	525	0	525	0
2.7042	0	525	0	525	0	525	0	525	0	530	0	525	0	530	0	525	0	525	0	525	0	525	0	530	0	530	0	525	0	525	0	520	0	525	0	525	0	525	0	535	0	525	0	525	0	525	0	525	0
2.7142	0	525	0	525	0	525	0	525	0	530	0	525	0	530	0	525	0	525	0	525	0	525	0	530	0	530	0	525	0	525	0	520	0	525	0	525	0	525	0	535	0	525	0	525	0	525	0	525	0
2.7242	0	525	0	525	0	525	0	525	0	530	0	525	0	530	0	525	0	525	0	525	0	525	0	530	0	530	0	525	0	525	0	520	0	525	0	525	0	525	0	535	0	525	0	525	0	525	0	525	0
2.7342	0	525	0	525	0	525	0	525	0	530	0	525	0	530	0	525	0	525	0	525	0	525	0	530	0	530	0	525	0	525	0	520	0	525	0	525	0	525	0	535	0	525	0	525	0	525	0	525	0
2.7443	0	525	0	525	0	525	0	525	0	530	0	525	0	530	0	525	0	525	0	525	0	525	0	530	0	530	0	525	0	525	0	520	0	525	0	525	0	525	0	535	0	525	0	525	0	525	0	525	0
2.7543	0	525	0	525	0	525	0	525	0	530	0	525	0	530	0	525	0	525	0	525	0	525	0	530	0	530	0	525	0	525	0	520	0	525	0	525	0	525	0	535	0	525	0	525	0	525	0	525	0
2.7643	0	525	0	525	0	525	0	525	0	530	0	525	0	530	0	525	0	525	0	525	0	525	0	530	0	530	0	525	0	525	0	520	0	525	0	525	0	525	0	535	0	525	0	525	0	525	0	525	0
2.7743	0	525	0	525	0	525	0	525	0	530	0	525	0	530	0	525	0	525	0	525	0	525	0	530	0	530	0	525	0	525	0	520	0	525	0	525	0	525	0	535	0	525	0	525	0	525	0	525	0
2.7843	0	525	0	525	0	525	0	525	0	530	0	525	0	530	0	525	0	525	0	525	0	525	0	530	0	530	0	525	0	525	0	520	0	525	0	525	0	525	0	535	0	525	0	525	0	525	0	525	0
2.7943	0	525	0	525	0	525	0	525	0	530	0	525	0	530	0	525	0	525	0	525	0	525	0	530	0	530	0	525	0	525	0	520	0	525	0	525	0	525	0	535	0	525	0	525	0	525	0	525	0
2.8044	0	525	0	525	0	525	0	525	0	530	0	525	0	530	0	525	0	525	0	525	0	525	0	530	0	530	0	525	0	525	0	520	0	525	0	525	0	525	0	535	0	525	0	525	0	525	0	525	0
2.8144	0	525	0	525	0	525	0	525	0	530	0	525	0	530	0	525	0	525	0	525	0	525	0	530	0	530	0	525	0	525	0	520	0	525	0	525	0	525	0	535	0	525	0	525	0	525	0	525	0
2.8244	0	525	0	525	0	525	0	525	0	530	0	525	0	530	0	525	0	525	0	525	0	525	0	530	0	530	0	525	0	525	0	520	0	525	0	525	0	525	0	535	0	525	0	525	0	525	0	525	0
2.8344	0	525	0	525	0	525	0	525	0	530	0	525	0	530	0	525	0	525	0	525	0	525	0	530	0	530	0	525	0	525	0	520	0	525	0	525	0	525	0	535	0	525	0	525	0	525	0	525	0
2.8444	0	525	0	525	0	525	0	525	0	530	0	525	0	530	0	525	0	525	0	525	0	525	0	530	0	530	0	525	0	525	0	520	0	525	0	525	0	525	0	535	0	525	0	525	0	525	0	525	0
2.8544	0	525	0	525	0	525	0	525	0	530	0	525	0	530	0	525	0	525	0	525	0	525	0	530	0	530	0	525	0	525	0	520	0	525	0	525	0	525	0	535	0	525	0	525	0	525	0	525	0
2.8644	0	525	0	525	0	525	0	525	0	530	0	525	0	530	0	525	0	525	0	525	0	525	0	530	0	530	0	525	0	525	0	520	0	525	0	525	0	525	0	535	0	525	0	525	0	525	0	525	0
2.8745	0	525	0	525	0	525	0	525	0	530	0	525	0	530	0	525	0	525	0	525	0	525	0	530	0	530	0	525	0	525	0	520	0	525	0	525	0	525	0	535	0	525	0	525	0	525	0	525	0
2.8845	0	525	0	525	0	525	0	525	0	530	0	525	0	530	0	525	0	525	0	525	0	525	0	530	0	530	0	525	0	525	0	520	0	525	0	525	0	525	0	535	0	525	0	525	0	525	0	525	0
2.8945	0	525	0	525	0	525	0	525	0	530	0	525	0	530	0	525	0	525	0	525	0	525	0	530	0	530	0	525	0	525	0	520	0	525	0	525	0	525	0	535	0	525	0	525	0	525	0	525	0
2.9045	0	525	0	525	0	525	0	525	0	530	0	525	0	530	0	525	0	525	0	525	0	525	0	530	0	530	0	525	0	525	0	520	0	525	0	525	0	525	0	535	0	525	0	525	0	525	0	525	0
2.9145	0	525	0	525	0	525	0	525	0	530	0	525	0	530	0	525	0	525	0	525	0	525	0	530	0	530	0	525	0	525	0	520	0	525	0	525	0	525	0	535	0	525	0	525	0	525	0	525	0
2.9245	0	525	0	525	0	525	0	525	0	530	0	525	0	530	0	525	0	525	0	525	0	525	0	530	0	530	0	525	0	525	0	520	0	525	0	525	0	525	0	535	0	525	0	525	0	525	0	525	0
2.9346	0	525	0	525	0	525	0	525	0	530	0	525	0	530	0	525	0	525	0	525	0	525	0	530	0	530	0	525	0	525	0	520	0	525	0	525	0	525	0	535	0	525	0	525	0	525	0	525	0
2.9446	0	525	0	525	0	525	0	525	0	530	0	525	0	530	0	525	0	525	0	525	0	525	0	530	0	530	0	525	0	525	0	520	0	525	0	525	0	525	0	535	0	525	0	525	0	525	0	525	0
2.9546	0	525	0	525	0	525	0	525	0	530	0	525	0	530	0	525	0	525	0	525	0	525	0	530	0	530	0	525	0	525	0	520	0	525	0	525	0	525	0	535	0	525	0	525	0	525	0	525	0
2.9646	0	525	0	525	0	525	0	525	0	530	0	525	0	530	0	525	0	525	0	525	0	525	0	530	0	530	0	525	0	525	0	520	0	525	0	525	0	525	0	535	0	525	0	525	0	525	0	525	0
2.9746	0	525	0	525	0	525	0	525	0	530	0	525	0	530	0	525	0	525	0	525	0	525	0	530	0	530	0	525	0	525	0	520	0	525	0	525	0	525	0	535	0	525	0	525	0	525	0	525	0
2.9846	0	525	0	525	0	525	0	525	0	530	0	525	0	530	0	525	0	525	0	525	0	525	0	530	0	530	0	525	0	525	0	520	0	525	0	525	0	525	0	535	0	525	0	525	0	525	0	525	0
2.9946	0	525	0	525	0	525	0	525	0	530	0	525	0	530	0	525	0	525	0	525	0	525	0	530	0	530	0	525	0	525	0	520	0	525	0	525	0	525	0	535	0	525	0	525	0	525	0	525	0
3.0047	0	525	0	525	0	525	0	525	0	530	0	525	0	530	0	525	0	525	0	525	0	525	0	530	0	530	0	525	0	525	0	520	0	525	0	525	0	525	0	535	0	525	0	525	0	525	0	525	0
3.0147	0	525	0	525	0	525	0	525	0	530	0	525	0	530	0	525	0	525	0	525	0	525	0	530	0	530	0	525	0	525	0	520	0	525	0	525	0	525	0	535	0	525	0	525	0	525	0	525	0
3.0247	0	525	0	525	0	525	0	525	0	530	0	525	0	530	0	525	0	525	0	525	0	525	0	530	0	530	0	525	0	525	0	520	0	525	0	525	0	525	0	535	0	525	0	525	0	525	0	525	0
3.0347	0	525	0	525	0	525	0	525	0	530	0	525	0	530	0	525	0	525	0	525	0	525	0	530	0	530	0	525	0	525	0	520	0	525	0	525	0	525	0	535	0	525	0	525	0	525	0	525	0
3.0447	0	525	0	525	0	525	0	525	0	530	0	525	0	530	0	525	0	525	0	525	0	525	0	530	0	530	0	525	0	525	0	520	0	525	0	525	0	525	0	535	0	525	0	525	0	525	0	525	0
3.0547	0	525	0	525	0	525	0	525	0	530	0	525	0	530	0	525	0	525	0	525	0	525	0	530	0	530	0	525	0	525	0	520	0	525	0	525	0	525	0	535	0	525	0	525	0	525	0	525	0
3.0648	0	525	0	525	0	525	0	525	0	530	0	525	0	530	0	525	0	525	0	525	0	525	0	530	0	530	0	525	0	525	0	520	0	525	0	525	0	525	0	535	0	525	0	525	0	525	0	525	0
3.0748	0	525	0	525	0	525	0	525	0	530	0	525	0	530	0	525	0	525	0	525	0	525	0	530	0	530	0	525	0	525	0	520	0	525	0	525	0	525	0	535	0	525	0	525	0	525	0	525	0
3.0848	0	525	0	525	0	525	0	525	0	530	0	525	0	530	0	525	0	525	0	525	0	525	0	530	0	530	0	525	0	525	0	520	0	525	0	525	0	525	0	535	0	525	0	525	0	525	0	525	0
3.0948	0	525	0	525	0	525	0	525	0	530	0	525	0	530	0	525	0	525	0	525	0	525	0	530	0	530	0	525	0	525	0	520	0	525	0	525	0	525	0	535	0	525	0	525	0	525	0	525	0
3.1048	0	525	0	525	0	525	0	525	0	530	0	525	0	530	0	525	0	525	0	525	0	525	0	530	0	530	0	525	0	525	0	520	0	525	0	525	0	525	0	535	0	525	0	525	0	525	0	525	0
3.1148	0	525	0	525	0	525	0	525	0	530	0	525	0	530	0	525	0	525	0	525	0	525	0	530	0	530	0	525	0	525	0	520	0	525	0	525	0	525	0	535	0	525	0	525	0	525	0	525	0
3.1249	0	525	0	525	0	525	0	525	0	530	0	525	0	530	0	525	0	525	0	525	0	525	0	530	0	530	0	525	0	525	0	520	0	525	0	525	0	525	0	535	0	525	0	525	0	525	0	525	0
3.1349	0	525	0	525	0	525	0	525	0	530	0	525	0	530	0	525	0	525	0	525	0	525	0	530	0	530	0	525	0	525	0	520	0	525	0	525	0	525	0	535	0	525	0	525	0	525	0	525	0
3.1449	0	525	0	525	0	525	0	525	0	530	0	525	0	530	0	525	0	525	0	525	0	525	0	530	0	530	0	525	0	525	0	520	0	525	0	525	0	525	0	535	0	525	0	525	0	525	0	525	0
3.1549	0	525	0	525	0	525	0	525	0	530	0	525	0	530	0	525	0	525	0	525	0	525	0	530	0	530	0	525	0	525	0	520	0	525	0	525	0	525	0	535	0	525	0	525	0	525	0	525	0
3.1649	0	525	0	525	0	525	0	525	0	530	0	525	0	530	0	525	0	525	0	525	0	525	0	530	0	530	0	525	0	525	0	520	0	525	0	525	0	525	0	535	0	525	0	525	0	525	0	525	0
3.1749	0	525	0	525	0	525	0	525	0	530	0	525	0	530	0	525	0	525	0	525	0	525	0	530	0	530	0	525	0	525	0	520	0	525	0	525	0	525	0	535	0	525	0	525	0	525	0	525	0
3.1849	0	525	0	525	0	525	0	525	0	530	0	525	0	530	0	525	0	525	0	525	0	525	0	530	0	530	0	525	0	525	0	520	0	525	0	525	0	525	0	535	0	525	0	525	0	525	0	525	0
3.195	0	525	0	525	0	525	0	525	0	530	0	525	0	530	0	525	0	525	0	525	0	525	0	530	0	530	0	525	0	525	0	520	0	525	0	525	0	525	0	535	0	525	0	525	0	525	0	525	0
3.205	0	525	0	525	0	525	0	525	0	530	0	525	0	530	0	525	0	525	0	525	0	525	0	530	0	530	0	525	0	525	0	520	0	525	0	525	0	525	0	535	0	525	0	525	0	525	0	525	0
3.215	0	525	0	525	0	525	0	525	0	530	0	525	0	530	0	525	0	525	0	525	0	525	0	530	0	530	0	525	0	525	0	520	0	525	0	525	0	525	0	535	0	525	0	525	0	525	0	525	0
3.225	0	525	0	525	0	525	0	525	0	530	0	525	0	530	0	525	0	525	0	525	0	525	0	530	0	530	0	525	0	525	0	520	0	525	0	525	0	525	0	535	0	525	0	525	0	525	0	525	0
3.235	0	525	0	525	0	525	0	525	0	530	0	525	0	530	0	525	0	525	0	525	0	525	0	530	0	530	0	525	0	525	0	520	0	525	0	525	0	525	0	535	0	525	0	525	0	525	0	525	0
3.245	0	525	0	525	0	525	0	525	0	530	0	525	0	530	0	525	0	525	0	525	0	525	0	530	0	530	0	525	0	525	0	520	0	525	0	525	0	525	0	535	0	525	0	525	0	525	0	525	0
3.2551	0	525	0	525	0	525	0	525	0	530	0	525	0	530	0	525	0	525	0	525	0	525	0	530	0	530	0	525	0	525	0	520	0	525	0	525	0	525	0	535	0	525	0	525	0	525	0	525	0
3.2651	0	525	0	525	0	525	0	525	0	530	0	525	0	530	0	525	0	525	0	525	0	525	0	530	0	530	0	525	0	525	0	520	0	525	0	525	0	525	0	535	0	525	0	525	0	525	0	525	0
3.2751	0	525	0	525	0	525	0	525	0	530	0	525	0	530	0	525	0	525	0	525	0	525	0	530	0	530	0	525	0	525	0	520	0	525	0	525	0	525	0	535	0	525	0	525	0	525	0	525	0
3.2851	0	525	0	525	0	525	0	525	0	530	0	525	0	530	0	525	0	525	0	525	0	525	0	530	0	530	0	525	0	525	0	520	0	525	0	525	0	525	0	535	0	525	0	525	0	525	0	525	0
3.2951	0	525	0	525	0	525	0	525	0	530	0	525	0	530	0	525	0	525	0	525	0	525	0	530	0	530	0	525	0	525	0	520	0	525	0	525	0	525	0	535	0	525	0	525	0	525	0	525	0
3.3051	0	525	0	525	0	525	0	525	0	530	0	525	0	530	0	525	0	525	0	525	0	525	0	530	0	530	0	525	0	525	0	520	0	525	0	525	0	525	0	535	0	525	0	525	0	525	0	525	0
3.3151	0	525	0	525	0	525	0	525	0	530	0	525	0	530	0	525	0	525	0	525	0	525	0	530	0	530	0	525	0	525	0	520	0	525	0	525	0	525	0	535	0	525	0	525	0	525	0	525	0
3.3252	0	525	0	525	0	525	0	525	0	530	0	525	0	530	0	525	0	525	0	525	0	525	0	530	0	530	0	525	0	525	0	520	0	525	0	525	0	525	0	535	0	525	0	525	0	525	0	525	0
3.3352	0	525	0	525	0	525	0	525	0	530	0	525	0	530	0	525	0	525	0	525	0	525	0	530	0	530	0	525	0	525	0	520	0	525	0	525	0	525	0	535	0	525	0	525	0	525	0	525	0
3.3452	0	525	0	525	0	525	0	525	0	530	0	525	0	530	0	525	0	525	0	525	0	525	0	530	0	530	0	525	0	525	0	520	0	525	0	525	0	525	0	535	0	525	0	525	0	525	0	525	0
3.3552	0	525	0	525	0	525	0	525	0	530	0	525	0	530	0	525	0	525	0	525	0	525	0	530	0	530	0	525	0	525	0	520	0	525	0	525	0	525	0	535	0	525	0	525	0	525	0	525	0
3.3652	0	525	0	525	0	525	0	525	0	530	0	525	0	530	0	525	0	525	0	525	0	525	0	530	0	530	0	525	0	525	0	520	0	525	0	525	0	525	0	535	0	525	0	525	0	525	0	525	0
3.3752	0	525	0	525	0	525	0	525	0	530	0	525	0	530	0	525	0	525	0	525	0	525	0	530	0	530	0	525	0	525	0	520	0	525	0	525	0	525	0	535	0	525	0	525	0	525	0	525	0
3.3853	0	525	0	525	0	525	0	525	0	530	0	525	0	530	0	525	0	525	0	525	0	525	0	530	0	530	0	525	0	525	0	520	0	525	0	525	0	525	0	535	0	525	0	525	0	525	0	525	0
3.3953	0	525	0	525	0	525	0	525	0	530	0	525	0	530	0	525	0	525	0	525	0	525	0	530	0	530	0	525	0	525	0	520	0	525	0	525	0	525	0	535	0	525	0	525	0	525	0	525	0
3.4053	0	525	0	525	0	525	0	525	0	530	0	525	0	530	0	525	0	525	0	525	0	525	0	530	0	530	0	525	0	525	0	520	0	525	0	525	0	525	0	535	0	525	0	525	0	525	0	525	0
3.4153	0	525	0	525	0	525	0	525	0	530	0	525	0	530	0	525	0	525	0	525	0	525	0	530	0	530	0	525	0	525	0	520	0	525	0	525	0	525	0	535	0	525	0	525	0	525	0	525	0
3.4253	0	525	0	525	0	525	0	525	0	530	0	525	0	530	0	525	0	525	0	525	0	525	0	530	0	530	0	525	0	525	0	520	0	525	0	525	0	525	0	535	0	525	0	525	0	525	0	525	0
3.4353	0	525	0	525	0	525	0	525	0	530	0	525	0	530	0	525	0	525	0	525	0	525	0	530	0	530	0	525	0	525	0	520	0	525	0	525	0	525	0	535	0	525	0	525	0	525	0	525	0
3.4453	0	525	0	525	0	525	0	525	0	530	0	525	0	530	0	525	0	525	0	525	0	525	0	530	0	530	0	525	0	525	0	520	0	525	0	525	0	525	0	535	0	525	0	525	0	525	0	525	0
3.4554	0	525	0	525	0	525	0	525	0	530	0	525	0	530	0	525	0	525	0	525	0	525	0	530	0	530	0	525	0	525	0	520	0	525	0	525	0	525	0	535	0	525	0	525	0	525	0	525	0
3.4654	0	525	0	525	0	525	0	525	0	530	0	525	0	530	0	525	0	525	0	525	0	525	0	530	0	530	0	525	0	525	0	520	0	525	0	525	0	525	0	535	0	525	0	525	0	525	0	525	0
3.4754	0	525	0	525	0	525	0	525	0	530	0	525	0	530	0	525	0	525	0	525	0	525	0	530	0	530	0	525	0	525	0	520	0	525	0	525	0	525	0	535	0	525	0	525	0	525	0	525	0
3.4854	0	525	0	525	0	525	0	525	0	530	0	525	0	530	0	525	0	525	0	525	0	525	0	530	0	530	0	525	0	525	0	520	0	525	0	525	0	525	0	535	0	525	0	525	0	525	0	525	0
3.4954	0	525	0	525	0	525	0	525	0	530	0	525	0	530	0	525	0	525	0	525	0	525	0	530	0	530	0	525	0	525	0	520	0	525	0	525	0	525	0	535	0	525	0	525	0	525	0	525	0
3.5054	0	525	0	525	0	525	0	525	0	530	0	525	0	530	0	525	0	525	0	525	0	525	0	530	0	530	0	525	0	525	0	520	0	525	0	525	0	525	0	535	0	525	0	525	0	525	0	525	0
3.5155	0	525	0	525	0	525	0	525	0	530	0	525	0	530	0	525	0	525	0	525	0	525	0	530	0	530	0	525	0	525	0	520	0	525	0	525	0	525	0	535	0	525	0	525	0	525	0	525	0
3.5255	0	525	0	525	0	525	0	525	0	530	0	525	0	530	0	525	0	525	0	525	0	525	0	530	0	530	0	525	0	525	0	520	0	525	0	525	0	525	0	535	0	525	0	525	0	525	0	525	0
3.5355	0	525	0	525	0	525	0	525	0	530	0	525	0	530	0	525	0	525	0	525	0	525	0	530	0	530	0	525	0	525	0	520	0	525	0	525	0	525	0	535	0	525	0	525	0	525	0	525	0
3.5455	0	525	0	525	0	525	0	525	0	530	0	525	0	530	0	525	0	525	0	525	0	525	0	530	0	530	0	525	0	525	0	520	0	525	0	525	0	525	0	535	0	525	0	525	0	525	0	525	0
3.5555	0	525	0	525	0	525	0	525	0	530	0	525	0	530	0	525	0	525	0	525	0	525	0	530	0	530	0	525	0	525	0	520	0	525	0	525	0	525	0	535	0	525	0	525	0	525	0	525	0
3.5655	0	525	0	525	0	525	0	525	0	530	0	525	0	530	0	525	0	525	0	525	0	525	0	530	0	530	0	525	0	525	0	520	0	525	0	525	0	525	0	535	0	525	0	525	0	525	0	525	0
3.5756	0	525	0	525	0	525	0	525	0	530	0	525	0	530	0	525	0	525	0	525	0	525	0	530	0	530	0	525	0	525	0	520	0	525	0	525	0	525	0	535	0	525	0	525	0	525	0	525	0
3.5856	0	525	0	525	0	525	0	525	0	530	0	525	0	530	0	525	0	525	0	525	0	525	0	530	0	530	0	525	0	525	0	520	0	525	0	525	0	525	0	535	0	525	0	525	0	525	0	525	0
3.5956	0	525	0	525	0	525	0	525	0	530	0	525	0	530	0	525	0	525	0	525	0	525	0	530	0	530	0	525	0	525	0	520	0	525	0	525	0	525	0	535	0	525	0	525	0	525	0	525	0
3.6056	0	525	0	525	0	525	0	525	0	530	0	525	0	530	0	525	0	525	0	525	0	525	0	530	0	530	0	525	0	525	0	520	0	525	0	525	0	525	0	535	0	525	0	525	0	525	0	525	0
3.6156	0	525	0	525	0	525	0	525	0	530	0	525	0	530	0	525	0	525	0	525	0	525	0	530	0	530	0	525	0	525	0	520	0	525	0	525	0	525	0	535	0	525	0	525	0	525	0	525	0
3.6256	0	525	0	525	0	525	0	525	0	530	0	525	0	530	0	525	0	525	0	525	0	525	0	530	0	530	0	525	0	525	0	520	0	525	0	525	0	525	0	535	0	525	0	525	0	525	0	525	0
3.6356	0	525	0	525	0	525	0	525	0	530	0	525	0	530	0	525	0	525	0	525	0	525	0	530	0	530	0	525	0	525	0	520	0	525	0	525	0	525	0	535	0	525	0	525	0	525	0	525	0
3.6457	0	525	0	525	0	525	0	525	0	530	0	525	0	530	0	525	0	525	0	525	0	525	0	530	0	530	0	525	0	525	0	520	0	525	0	525	0	525	0	535	0	525	0	525	0	525	0	525	0
3.6557	0	525	0	525	0	525	0	525	0	530	0	525	0	530	0	525	0	525	0	525	0	525	0	530	0	530	0	525	0	525	0	520	0	525	0	525	0	525	0	535	0	525	0	525	0	525	0	525	0
3.6657	0	525	0	525	0	525	0	525	0	530	0	525	0	530	0	525	0	525	0	525	0	525	0	530	0	530	0	525	0	525	0	520	0	525	0	525	0	525	0	535	0	525	0	525	0	525	0	525	0
3.6757	0	525	0	525	0	525	0	525	0	530	0	525	0	530	0	525	0	525	0	525	0	525	0	530	0	530	0	525	0	525	0	520	0	525	0	525	0	525	0	535	0	525	0	525	0	525	0	525	0
3.6857	0	525	0	525	0	525	0	525	0	530	0	525	0	530	0	525	0	525	0	525	0	525	0	530	0	530	0	525	0	525	0	520	0	525	0	525	0	525	0	535	0	525	0	525	0	525	0	525	0
3.6957	0	525	0	525	0	525	0	525	0	530	0	525	0	530	0	525	0	525	0	525	0	525	0	530	0	530	0	525	0	525	0	520	0	525	0	525	0	525	0	535	0	525	0	525	0	525	0	525	0
3.7058	0	525	0	525	0	525	0	525	0	530	0	525	0	530	0	525	0	525	0	525	0	525	0	530	0	530	0	525	0	525	0	520	0	525	0	525	0	525	0	535	0	525	0	525	0	525	0	525	0
3.7158	0	525	0	525	0	525	0	525	0	530	0	525	0	530	0	525	0	525	0	525	0	525	0	530	0	530	0	525	0	525	0	520	0	525	0	525	0	525	0	535	0	525	0	525	0	525	0	525	0
3.7258	0	525	0	525	0	525	0	525	0	530	0	525	0	530	0	525	0	525	0	525	0	525	0	530	0	530	0	525	0	525	0	520	0	525	0	525	0	525	0	535	0	525	0	525	0	525	0	525	0
3.7358	0	525	0	525	0	525	0	525	0	530	0	525	0	530	0	525	0	525	0	525	0	525	0	530	0	530	0	525	0	525	0	520	0	525	0	525	0	525	0	535	0	525	0	525	0	525	0	525	0
3.7458	0	525	0	525	0	525	0	525	0	530	0	525	0	530	0	525	0	525	0	525	0	525	0	530	0	530	0	525	0	525	0	520	0	525	0	525	0	525	0	535	0	525	0	525	0	525	0	525	0
3.7558	0	525	0	525	0	525	0	525	0	530	0	525	0	530	0	525	0	525	0	525	0	525	0	530	0	530	0	525	0	525	0	520	0	525	0	525	0	525	0	535	0	525	0	525	0	525	0	525	0
3.7658	0	525	0	525	0	525	0	525	0	530	0	525	0	530	0	525	0	525	0	525	0	525	0	530	0	530	0	525	0	525	0	520	0	525	0	525	0	525	0	535	0	525	0	525	0	525	0	525	0
3.7759	0	525	0	525	0	525	0	525	0	530	0	525	0	530	0	525	0	525	0	525	0	525	0	530	0	530	0	525	0	525	0	520	0	525	0	525	0	525	0	535	0	525	0	525	0	525	0	525	0
3.7859	0	525	0	525	0	525	0	525	0	530	0	525	0	530	0	525	0	525	0	525	0	525	0	530	0	530	0	525	0	525	0	520	0	525	0	525	0	525	0	535	0	525	0	525	0	525	0	525	0
3.7959	0	525	0	525	0	525	0	525	0	530	0	525	0	530	0	525	0	525	0	525	0	525	0	530	0	530	0	525	0	525	0	520	0	525	0	525	0	525	0	535	0	525	0	525	0	525	0	525	0
3.8059	0	525	0	525	0	525	0	525	0	530	0	525	0	530	0	525	0	525	0	525	0	525	0	530	0	530	0	525	0	525	0	520	0	525	0	525	0	525	0	535	0	525	0	525	0	525	0	525	0
3.8159	0	525	0	525	0	525	0	525	0	530	0	525	0	530	0	525	0	525	0	525	0	525	0	530	0	530	0	525	0	525	0	520	0	525	0	525	0	525	0	535	0	525	0	525	0	525	0	525	0
3.8259	0	525	0	525	0	525	0	525	0	530	0	525	0	530	0	525	0	525	0	525	0	525	0	530	0	530	0	525	0	525	0	520	0	525	0	525	0	525	0	535	0	525	0	525	0	525	0	525	0
3.836	0	525	0	525	0	525	0	525	0	530	0	525	0	530	0	525	0	525	0	525	0	525	0	530	0	530	0	525	0	525	0	520	0	525	0	525	0	525	0	535	0	525	0	525	0	525	0	525	0
3.846	0	525	0	525	0	525	0	525	0	530	0	525	0	530	0	525	0	525	0	525	0	525	0	530	0	530	0	525	0	525	0	520	0	525	0	525	0	525	0	535	0	525	0	525	0	525	0	525	0
3.856	0	525	0	525	0	525	0	525	0	530	0	525	0	530	0	525	0	525	0	525	0	525	0	530	0	530	0	525	0	525	0	520	0	525	0	525	0	525	0	535	0	525	0	525	0	525	0	525	0
3.866	0	525	0	525	0	525	0	525	0	530	0	525	0	530	0	525	0	525	0	525	0	525	0	530	0	530	0	525	0	525	0	520	0	525	0	525	0	525	0	535	0	525	0	525	0	525	0	525	0
3.876	0	525	0	525	0	525	0	525	0	530	0	525	0	530	0	525	0	525	0	525	0	525	0	530	0	530	0	525	0	525	0	520	0	525	0	525	0	525	0	535	0	525	0	525	0	525	0	525	0
3.886	0	525	0	525	0	525	0	525	0	530	0	525	0	530	0	525	0	525	0	525	0	525	0	530	0	530	0	525	0	525	0	520	0	525	0	525	0	525	0	535	0	525	0	525	0	525	0	525	0
3.896	0	525	0	525	0	525	0	525	0	530	0	525	0	530	0	525	0	525	0	525	0	525	0	530	0	530	0	525	0	525	0	520	0	525	0	525	0	525	0	535	0	525	0	525	0	525	0	525	0
3.9061	0	525	0	525	0	525	0	525	0	530	0	525	0	530	0	525	0	525	0	525	0	525	0	530	0	530	0	525	0	525	0	520	0	525	0	525	0	525	0	535	0	525	0	525	0	525	0	525	0
3.9161	0	525	0	525	0	525	0	525	0	530	0	525	0	530	0	525	0	525	0	525	0	525	0	530	0	530	0	525	0	525	0	520	0	525	0	525	0	525	0	535	0	525	0	525	0	525	0	525	0
3.9261	0	525	0	525	0	525	0	525	0	530	0	525	0	530	0	525	0	525	0	525	0	525	0	530	0	530	0	525	0	525	0	520	0	525	0	525	0	525	0	535	0	525	0	525	0	525	0	525	0
3.9361	0	525	0	525	0	525	0	525	0	530	0	525	0	530	0	525	0	525	0	525	0	525	0	530	0	530	0	525	0	525	0	520	0	525	0	525	0	525	0	535	0	525	0	525	0	525	0	525	0
3.9461	0	525	0	525	0	525	0	525	0	530	0	525	0	530	0	525	0	525	0	525	0	525	0	530	0	530	0	525	0	525	0	520	0	525	0	525	0	525	0	535	0	525	0	525	0	525	0	525	0
3.9561	0	525	0	525	0	525	0	525	0	530	0	525	0	530	0	525	0	525	0	525	0	525	0	530	0	530	0	525	0	525	0	520	0	525	0	525	0	525	0	535	0	525	0	525	0	525	0	525	0
3.9662	0	525	0	525	0	525	0	525	0	530	0	525	0	530	0	525	0	525	0	525	0	525	0	530	0	530	0	525	0	525	0	520	0	525	0	525	0	525	0	535	0	525	0	525	0	525	0	525	0
3.9762	0	525	0	525	0	525	0	525	0	530	0	525	0	530	0	525	0	525	0	525	0	525	0	530	0	530	0	525	0	525	0	520	0	525	0	525	0	525	0	535	0	525	0	525	0	525	0	525	0
3.9862	0	525	0	525	0	525	0	525	0	530	0	525	0	530	0	525	0	525	0	525	0	525	0	530	0	530	0	525	0	525	0	520	0	525	0	525	0	525	0	535	0	525	0	525	0	525	0	525	0
3.9962	0	525	0	525	0	525	0	525	0	530	0	525	0	530	0	525	0	525	0	525	0	525	0	530	0	530	0	525	0	525	0	520	0	525	0	525	0	525	0	535	0	525	0	525	0	525	0	525	0
4.0062	0	525	0	525	0	525	0	525	0	530	0	525	0	530	0	525	0	525	0	525	0	525	0	530	0	530	0	525	0	525	0	520	0	525	0	525	0	525	0	535	0	525	0	525	0	525	0	525	0
4.0162	0	525	0	525	0	525	0	525	0	530	0	525	0	530	0	525	0	525	0	525	0	525	0	530	0	530	0	525	0	525	0	520	0	525	0	525	0	525	0	535	0	525	0	525	0	525	0	525	0
4.0263	0	525	0	525	0	525	0	525	0	530	0	525	0	530	0	525	0	525	0	525	0	525	0	530	0	530	0	525	0	525	0	520	0	525	0	525	0	525	0	535	0	525	0	525	0	525	0	525	0
4.0363	0	525	0	525	0	525	0	525	0	530	0	525	0	530	0	525	0	525	0	525	0	525	0	530	0	530	0	525	0	525	0	520	0	525	0	525	0	525	0	535	0	525	0	525	0	525	0	525	0
4.0463	0	525	0	525	0	525	0	525	0	530	0	525	0	530	0	525	0	525	0	525	0	525	0	530	0	530	0	525	0	525	0	520	0	525	0	525	0	525	0	535	0	525	0	525	0	525	0	525	0
4.0563	0	525	0	525	0	525	0	525	0	530	0	525	0	530	0	525	0	525	0	525	0	525	0	530	0	530	0	525	0	525	0	520	0	525	0	525	0	525	0	535	0	525	0	525	0	525	0	525	0
4.0663	0	525	0	525	0	525	0	525	0	530	0	525	0	530	0	525	0	525	0	525	0	525	0	530	0	530	0	525	0	525	0	520	0	525	0	525	0	525	0	535	0	525	0	525	0	525	0	525	0
4.0763	0	525	0	525	0	525	0	525	0	530	0	525	0	530	0	525	0	525	0	525	0	525	0	530	0	530	0	525	0	525	0	520	0	525	0	525	0	525	0	535	0	525	0	525	0	525	0	525	0
4.0863	0	525	0	525	0	525	0	525	0	530	0	525	0	530	0	525	0	525	0	525	0	525	0	530	0	530	0	525	0	525	0	520	0	525	0	525	0	525	0	535	0	525	0	525	0	525	0	525	0
4.0964	0	525	0	525	0	525	0	525	0	530	0	525	0	530	0	525	0	525	0	525	0	525	0	530	0	530	0	525	0	525	0	520	0	525	0	525	0	525	0	535	0	525	0	525	0	525	0	525	0
4.1064	0	525	0	525	0	525	0	525	0	530	0	525	0	530	0	525	0	525	0	525	0	525	0	530	0	530	0	525	0	525	0	520	0	525	0	525	0	525	0	535	0	525	0	525	0	525	0	525	0
4.1164	0	525	0	525	0	525	0	525	0	530	0	525	0	530	0	525	0	525	0	525	0	525	0	530	0	530	0	525	0	525	0	520	0	525	0	525	0	525	0	535	0	525	0	525	0	525	0	525	0
4.1264	0	525	0	525	0	525	0	525	0	530	0	525	0	530	0	525	0	525	0	525	0	525	0	530	0	530	0	525	0	525	0	520	0	525	0	525	0	525	0	535	0	525	0	525	0	525	0	525	0
4.1364	0	525	0	525	0	525	0	525	0	530	0	525	0	530	0	525	0	525	0	525	0	525	0	530	0	530	0	525	0	525	0	520	0	525	0	525	0	525	0	535	0	525	0	525	0	525	0	525	0
4.1464	0	525	0	525	0	525	0	525	0	530	0	525	0	530	0	525	0	525	0	525	0	525	0	530	0	530	0	525	0	525	0	520	0	525	0	525	0	525	0	535	0	525	0	525	0	525	0	525	0
4.1565	0	525	0	525	0	525	0	525	0	530	0	525	0	530	0	525	0	525	0	525	0	525	0	530	0	530	0	525	0	525	0	520	0	525	0	525	0	525	0	535	0	525	0	525	0	525	0	525	0
4.1665	0	525	0	525	0	525	0	525	0	530	0	525	0	530	0	525	0	525	0	525	0	525	0	530	0	530	0	525	0	525	0	520	0	525	0	525	0	525	0	535	0	525	0	525	0	525	0	525	0
4.1765	0	525	0	525	0	525	0	525	0	530	0	525	0	530	0	525	0	525	0	525	0	525	0	530	0	530	0	525	0	525	0	520	0	525	0	525	0	525	0	535	0	525	0	525	0	525	0	525	0
4.1865	0	525	0	525	0	525	0	525	0	530	0	525	0	530	0	525	0	525	0	525	0	525	0	530	0	530	0	525	0	525	0	520	0	525	0	525	0	525	0	535	0	525	0	525	0	525	0	525	0
4.1965	0	525	0	525	0	525	0	525	0	530	0	525	0	530	0	525	0	525	0	525	0	525	0	530	0	530	0	525	0	525	0	520	0	525	0	525	0	525	0	535	0	525	0	525	0	525	0	525	0
4.2065	0	525	0	525	0	525	0	525	0	530	0	525	0	530	0	525	0	525	0	525	0	525	0	530	0	530	0	525	0	525	0	520	0	525	0	525	0	525	0	535	0	525	0	525	0	525	0	525	0
4.2165	0	525	0	525	0	525	0	525	0	530	0	525	0	530	0	525	0	525	0	525	0	525	0	530	0	530	0	525	0	525	0	520	0	525	0	525	0	525	0	535	0	525	0	525	0	525	0	525	0
4.2266	0	525	0	525	0	525	0	525	0	530	0	525	0	530	0	525	0	525	0	525	0	525	0	530	0	530	0	525	0	525	0	520	0	525	0	525	0	525	0	535	0	525	0	525	0	525	0	525	0
4.2366	0	525	0	525	0	525	0	525	0	530	0	525	0	530	0	525	0	525	0	525	0	525	0	530	0	530	0	525	0	525	0	520	0	525	0	525	0	525	0	535	0	525	0	525	0	525	0	525	0
4.2466	0	525	0	525	0	525	0	525	0	530	0	525	0	530	0	525	0	525	0	525	0	525	0	530	0	530	0	525	0	525	0	520	0	525	0	525	0	525	0	535	0	525	0	525	0	525	0	525	0
4.2566	0	525	0	525	0	525	0	525	0	530	0	525	0	530	0	525	0	525	0	525	0	525	0	530	0	530	0	525	0	525	0	520	0	525	0	525	0	525	0	535	0	525	0	525	0	525	0	525	0
4.2666	0	525	0	525	0	525	0	525	0	530	0	525	0	530	0	525	0	525	0	525	0	525	0	530	0	530	0	525	0	525	0	520	0	525	0	525	0	525	0	535	0	525	0	525	0	525	0	525	0
4.2766	0	525	0	525	0	525	0	525	0	530	0	525	0	530	0	525	0	525	0	525	0	525	0	530	0	530	0	525	0	525	0	520	0	525	0	525	0	525	0	535	0	525	0	525	0	525	0	525	0
4.2867	0	525	0	525	0	525	0	525	0	530	0	525	0	530	0	525	0	525	0	525	0	525	0	530	0	530	0	525	0	525	0	520	0	525	0	525	0	525	0	535	0	525	0	525	0	525	0	525	0
4.2967	0	525	0	525	0	525	0	525	0	530	0	525	0	530	0	525	0	525	0	525	0	525	0	530	0	530	0	525	0	525	0	520	0	525	0	525	0	525	0	535	0	525	0	525	0	525	0	525	0
4.3067	0	525	0	525	0	525	0	525	0	530	0	525	0	530	0	525	0	525	0	525	0	525	0	530	0	530	0	525	0	525	0	520	0	525	0	525	0	525	0	535	0	525	0	525	0	525	0	525	0
4.3167	0	525	0	525	0	525	0	525	0	530	0	525	0	530	0	525	0	525	0	525	0	525	0	530	0	530	0	525	0	525	0	520	0	525	0	525	0	525	0	535	0	525	0	525	0	525	0	525	0
4.3267	0	525	0	525	0	525	0	525	0	530	0	525	0	530	0	525	0	525	0	525	0	525	0	530	0	530	0	525	0	525	0	520	0	525	0	525	0	525	0	535	0	525	0	525	0	525	0	525	0
4.3367	0	525	0	525	0	525	0	525	0	530	0	525	0	530	0	525	0	525	0	525	0	525	0	530	0	530	0	525	0	525	0	520	0	525	0	525	0	525	0	535	0	525	0	525	0	525	0	525	0
4.3467	0	525	0	525	0	525	0	525	0	530	0	525	0	530	0	525	0	525	0	525	0	525	0	530	0	530	0	525	0	525	0	520	0	525	0	525	0	525	0	535	0	525	0	525	0	525	0	525	0
4.3568	0	525	0	525	0	525	0	525	0	530	0	525	0	530	0	525	0	525	0	525	0	525	0	530	0	530	0	525	0	525	0	520	0	525	0	525	0	525	0	535	0	525	0	525	0	525	0	525	0
4.3668	0	525	0	525	0	525	0	525	0	530	0	525	0	530	0	525	0	525	0	525	0	525	0	530	0	530	0	525	0	525	0	520	0	525	0	525	0	525	0	535	0	525	0	525	0	525	0	525	0
4.3768	0	525	0	525	0	525	0	525	0	530	0	525	0	530	0	525	0	525	0	525	0	525	0	530	0	530	0	525	0	525	0	520	0	525	0	525	0	525	0	535	0	525	0	525	0	525	0	525	0
4.3868	0	525	0	525	0	525	0	525	0	530	0	525	0	530	0	525	0	525	0	525	0	525	0	530	0	530	0	525	0	525	0	520	0	525	0	525	0	525	0	535	0	525	0	525	0	525	0	525	0
4.3968	0	525	0	525	0	525	0	525	0	530	0	525	0	530	0	525	0	525	0	525	0	525	0	530	0	530	0	525	0	525	0	520	0	525	0	525	0	525	0	535	0	525	0	525	0	525	0	525	0
4.4068	0	525	0	525	0	525	0	525	0	530	0	525	0	530	0	525	0	525	0	525	0	525	0	530	0	530	0	525	0	525	0	520	0	525	0	525	0	525	0	535	0	525	0	525	0	525	0	525	0
4.4169	0	525	0	525	0	525	0	525	0	530	0	525	0	530	0	525	0	525	0	525	0	525	0	530	0	530	0	525	0	525	0	520	0	525	0	525	0	525	0	535	0	525	0	525	0	525	0	525	0
4.4269	0	525	0	525	0	525	0	525	0	530	0	525	0	530	0	525	0	525	0	525	0	525	0	530	0	530	0	525	0	525	0	520	0	525	0	525	0	525	0	535	0	525	0	525	0	525	0	525	0
4.4369	0	525	0	525	0	525	0	525	0	530	0	525	0	530	0	525	0	525	0	525	0	525	0	530	0	530	0	525	0	525	0	520	0	525	0	525	0	525	0	535	0	525	0	525	0	525	0	525	0
4.4469	0	525	0	525	0	525	0	525	0	530	0	525	0	530	0	525	0	525	0	525	0	525	0	530	0	530	0	525	0	525	0	520	0	525	0	525	0	525	0	535	0	525	0	525	0	525	0	525	0
4.4569	0	525	0	525	0	525	0	525	0	530	0	525	0	530	0	525	0	525	0	525	0	525	0	530	0	530	0	525	0	525	0	520	0	525	0	525	0	525	0	535	0	525	0	525	0	525	0	525	0
4.4669	0	525	0	525	0	525	0	525	0	530	0	525	0	530	0	525	0	525	0	525	0	525	0	530	0	530	0	525	0	525	0	520	0	525	0	525	0	525	0	535	0	525	0	525	0	525	0	525	0
4.4769	0	525	0	525	0	525	0	525	0	530	0	525	0	530	0	525	0	525	0	525	0	525	0	530	0	530	0	525	0	525	0	520	0	525	0	525	0	525	0	535	0	525	0	525	0	525	0	525	0
4.487	0	525	0	525	0	525	0	525	0	530	0	525	0	530	0	525	0	525	0	525	0	525	0	530	0	530	0	525	0	525	0	520	0	525	0	525	0	525	0	535	0	525	0	525	0	525	0	525	0
4.497	0	525	0	525	0	525	0	525	0	530	0	525	0	530	0	525	0	525	0	525	0	525	0	530	0	530	0	525	0	525	0	520	0	525	0	525	0	525	0	535	0	525	0	525	0	525	0	525	0
4.507	0	525	0	525	0	525	0	525	0	530	0	525	0	530	0	525	0	525	0	525	0	525	0	530	0	530	0	525	0	525	0	520	0	525	0	525	0	525	0	535	0	525	0	525	0	525	0	525	0
4.517	0	525	0	525	0	525	0	525	0	530	0	525	0	530	0	525	0	525	0	525	0	525	0	530	0	530	0	525	0	525	0	520	0	525	0	525	0	525	0	535	0	525	0	525	0	525	0	525	0
4.527	0	525	0	525	0	525	0	525	0	530	0	525	0	530	0	525	0	525	0	525	0	525	0	530	0	530	0	525	0	525	0	520	0	525	0	525	0	525	0	535	0	525	0	525	0	525	0	525	0
4.537	0	525	0	525	0	525	0	525	0	530	0	525	0	530	0	525	0	525	0	525	0	525	0	530	0	530	0	525	0	525	0	520	0	525	0	525	0	525	0	535	0	525	0	525	0	525	0	525	0
4.5471	0	525	0	525	0	525	0	525	0	530	0	525	0	530	0	525	0	525	0	525	0	525	0	530	0	530	0	525	0	525	0	520	0	525	0	525	0	525	0	535	0	525	0	525	0	525	0	525	0
4.5571	0	525	0	525	0	525	0	525	0	530	0	525	0	530	0	525	0	525	0	525	0	525	0	530	0	530	0	525	0	525	0	520	0	525	0	525	0	525	0	535	0	525	0	525	0	525	0	525	0
4.5671	0	525	0	525	0	525	0	525	0	530	0	525	0	530	0	525	0	525	0	525	0	525	0	530	0	530	0	525	0	525	0	520	0	525	0	525	0	525	0	535	0	525	0	525	0	525	0	525	0
4.5771	0	525	0	525	0	525	0	525	0	530	0	525	0	530	0	525	0	525	0	525	0	525	0	530	0	530	0	525	0	525	0	520	0	525	0	525	0	525	0	535	0	525	0	525	0	525	0	525	0
4.5871	0	525	0	525	0	525	0	525	0	530	0	525	0	530	0	525	0	525	0	525	0	525	0	530	0	530	0	525	0	525	0	520	0	525	0	525	0	525	0	535	0	525	0	525	0	525	0	525	0
4.5971	0	525	0	525	0	525	0	525	0	530	0	525	0	530	0	525	0	525	0	525	0	525	0	530	0	530	0	525	0	525	0	520	0	525	0	525	0	525	0	535	0	525	0	525	0	525	0	525	0
4.6072	0	525	0	525	0	525	0	525	0	530	0	525	0	530	0	525	0	525	0	525	0	525	0	530	0	530	0	525	0	525	0	520	0	525	0	525	0	525	0	535	0	525	0	525	0	525	0	525	0
4.6172	0	525	0	525	0	525	0	525	0	530	0	525	0	530	0	525	0	525	0	525	0	525	0	530	0	530	0	525	0	525	0	520	0	525	0	525	0	525	0	535	0	525	0	525	0	525	0	525	0
4.6272	0	525	0	525	0	525	0	525	0	530	0	525	0	530	0	525	0	525	0	525	0	525	0	530	0	530	0	525	0	525	0	520	0	525	0	525	0	525	0	535	0	525	0	525	0	525	0	525	0
4.6372	0	525	0	525	0	525	0	525	0	530	0	525	0	530	0	525	0	525	0	525	0	525	0	530	0	530	0	525	0	525	0	520	0	525	0	525	0	525	0	535	0	525	0	525	0	525	0	525	0
4.6472	0	525	0	525	0	525	0	525	0	530	0	525	0	530	0	525	0	525	0	525	0	525	0	530	0	530	0	525	0	525	0	520	0	525	0	525	0	525	0	535	0	525	0	525	0	525	0	525	0
4.6572	0	525	0	525	0	525	0	525	0	530	0	525	0	530	0	525	0	525	0	525	0	525	0	530	0	530	0	525	0	525	0	520	0	525	0	525	0	525	0	535	0	525	0	525	0	525	0	525	0
4.6672	0	525	0	525	0	525	0	525	0	530	0	525	0	530	0	525	0	525	0	525	0	525	0	530	0	530	0	525	0	525	0	520	0	525	0	525	0	525	0	535	0	525	0	525	0	525	0	525	0
4.6773	0	525	0	525	0	525	0	525	0	530	0	525	0	530	0	525	0	525	0	525	0	525	0	530	0	530	0	525	0	525	0	520	0	525	0	525	0	525	0	535	0	525	0	525	0	525	0	525	0
4.6873	0	525	0	525	0	525	0	525	0	530	0	525	0	530	0	525	0	525	0	525	0	525	0	530	0	530	0	525	0	525	0	520	0	525	0	525	0	525	0	535	0	525	0	525	0	525	0	525	0
4.6973	0	525	0	525	0	525	0	525	0	530	0	525	0	530	0	525	0	525	0	525	0	525	0	530	0	530	0	525	0	525	0	520	0	525	0	525	0	525	0	535	0	525	0	525	0	525	0	525	0
4.7073	0	525	0	525	0	525	0	525	0	530	0	525	0	530	0	525	0	525	0	525	0	525	0	530	0	530	0	525	0	525	0	520	0	525	0	525	0	525	0	535	0	525	0	525	0	525	0	525	0
4.7173	0	525	0	525	0	525	0	525	0	530	0	525	0	530	0	525	0	525	0	525	0	525	0	530	0	530	0	525	0	525	0	520	0	525	0	525	0	525	0	535	0	525	0	525	0	525	0	525	0
4.7273	0	525	0	525	0	525	0	525	0	530	0	525	0	530	0	525	0	525	0	525	0	525	0	530	0	530	0	525	0	525	0	520	0	525	0	525	0	525	0	535	0	525	0	525	0	525	0	525	0
4.7374	0	525	0	525	0	525	0	525	0	530	0	525	0	530	0	525	0	525	0	525	0	525	0	530	0	530	0	525	0	525	0	520	0	525	0	525	0	525	0	535	0	525	0	525	0	525	0	525	0
4.7474	0	525	0	525	0	525	0	525	0	530	0	525	0	530	0	525	0	525	0	525	0	525	0	530	0	530	0	525	0	525	0	520	0	525	0	525	0	525	0	535	0	525	0	525	0	525	0	525	0
4.7574	0	525	0	525	0	525	0	525	0	530	0	525	0	530	0	525	0	525	0	525	0	525	0	530	0	530	0	525	0	525	0	520	0	525	0	525	0	525	0	535	0	525	0	525	0	525	0	525	0
4.7674	0	525	0	525	0	525	0	525	0	530	0	525	0	530	0	525	0	525	0	525	0	525	0	530	0	530	0	525	0	525	0	520	0	525	0	525	0	525	0	535	0	525	0	525	0	525	0	525	0
4.7774	0	525	0	525	0	525	0	525	0	530	0	525	0	530	0	525	0	525	0	525	0	525	0	530	0	530	0	525	0	525	0	520	0	525	0	525	0	525	0	535	0	525	0	525	0	525	0	525	0
4.7874	0	525	0	525	0	525	0	525	0	530	0	525	0	530	0	525	0	525	0	525	0	525	0	530	0	530	0	525	0	525	0	520	0	525	0	525	0	525	0	535	0	525	0	525	0	525	0	525	0
4.7974	0	525	0	525	0	525	0	525	0	530	0	525	0	530	0	525	0	525	0	525	0	525	0	530	0	530	0	525	0	525	0	520	0	525	0	525	0	525	0	535	0	525	0	525	0	525	0	525	0
4.8075	0	525	0	525	0	525	0	525	0	530	0	525	0	530	0	525	0	525	0	525	0	525	0	530	0	530	0	525	0	525	0	520	0	525	0	525	0	525	0	535	0	525	0	525	0	525	0	525	0
4.8175	0	525	0	525	0	525	0	525	0	530	0	525	0	530	0	525	0	525	0	525	0	525	0	530	0	530	0	525	0	525	0	520	0	525	0	525	0	525	0	535	0	525	0	525	0	525	0	525	0
4.8275	0	525	0	525	0	525	0	525	0	530	0	525	0	530	0	525	0	525	0	525	0	525	0	530	0	530	0	525	0	525	0	520	0	525	0	525	0	525	0	535	0	525	0	525	0	525	0	525	0
4.8375	0	525	0	525	0	525	0	525	0	530	0	525	0	530	0	525	0	525	0	525	0	525	0	530	0	530	0	525	0	525	0	520	0	525	0	525	0	525	0	535	0	525	0	525	0	525	0	525	0
4.8475	0	525	0	525	0	525	0	525	0	530	0	525	0	530	0	525	0	525	0	525	0	525	0	530	0	530	0	525	0	525	0	520	0	525	0	525	0	525	0	535	0	525	0	525	0	525	0	525	0
4.8575	0	525	0	525	0	525	0	525	0	530	0	525	0	530	0	525	0	525	0	525	0	525	0	530	0	530	0	525	0	525	0	520	0	525	0	525	0	525	0	535	0	525	0	525	0	525	0	525	0
4.8676	0	525	0	525	0	525	0	525	0	530	0	525	0	530	0	525	0	525	0	525	0	525	0	530	0	530	0	525	0	525	0	520	0	525	0	525	0	525	0	535	0	525	0	525	0	525	0	525	0
4.8776	0	525	0	525	0	525	0	525	0	530	0	525	0	530	0	525	0	525	0	525	0	525	0	530	0	530	0	525	0	525	0	520	0	525	0	525	0	525	0	535	0	525	0	525	0	525	0	525	0
4.8876	0	525	0	525	0	525	0	525	0	530	0	525	0	530	0	525	0	525	0	525	0	525	0	530	0	530	0	525	0	525	0	520	0	525	0	525	0	525	0	535	0	525	0	525	0	525	0	525	0
4.8976	0	525	0	525	0	525	0	525	0	530	0	525	0	530	0	525	0	525	0	525	0	525	0	530	0	530	0	525	0	525	0	520	0	525	0	525	0	525	0	535	0	525	0	525	0	525	0	525	0
4.9076	0	525	0	525	0	525	0	525	0	530	0	525	0	530	0	525	0	525	0	525	0	525	0	530	0	530	0	525	0	525	0	520	0	525	0	525	0	525	0	535	0	525	0	525	0	525	0	525	0
4.9176	0	525	0	525	0	525	0	525	0	530	0	525	0	530	0	525	0	525	0	525	0	525	0	530	0	530	0	525	0	525	0	520	0	525	0	525	0	525	0	535	0	525	0	525	0	525	0	525	0
4.9276	0	525	0	525	0	525	0	525	0	530	0	525	0	530	0	525	0	525	0	525	0	525	0	530	0	530	0	525	0	525	0	520	0	525	0	525	0	525	0	535	0	525	0	525	0	525	0	525	0
4.9377	0	525	0	525	0	525	0	525	0	530	0	525	0	530	0	525	0	525	0	525	0	525	0	530	0	530	0	525	0	525	0	520	0	525	0	525	0	525	0	535	0	525	0	525	0	525	0	525	0
4.9477	0	525	0	525	0	525	0	525	0	530	0	525	0	530	0	525	0	525	0	525	0	525	0	530	0	530	0	525	0	525	0	520	0	525	0	525	0	525	0	535	0	525	0	525	0	525	0	525	0
4.9577	0	525	0	525	0	525	0	525	0	530	0	525	0	530	0	525	0	525	0	525	0	525	0	530	0	530	0	525	0	525	0	520	0	525	0	525	0	525	0	535	0	525	0	525	0	525	0	525	0
4.9677	0	525	0	525	0	525	0	525	0	530	0	525	0	530	0	525	0	525	0	525	0	525	0	530	0	530	0	525	0	525	0	520	0	525	0	525	0	525	0	535	0	525	0	525	0	525	0	525	0
4.9777	0	525	0	525	0	525	0	525	0	530	0	525	0	530	0	525	0	525	0	525	0	525	0	530	0	530	0	525	0	525	0	520	0	525	0	525	0	525	0	535	0	525	0	525	0	525	0	525	0
4.9877	0	525	0	525	0	525	0	525	0	530	0	525	0	530	0	525	0	525	0	525	0	525	0	530	0	530	0	525	0	525	0	520	0	525	0	525	0	525	0	535	0	525	0	525	0	525	0	525	0
4.9978	0	525	0	525	0	525	0	525	0	530	0	525	0	530	0	525	0	525	0	525	0	525	0	530	0	530	0	525	0	525	0	520	0	525	0	525	0	525	0	535	0	525	0	525	0	525	0	525	0
5.0078	0	525	0	525	0	525	0	525	0	530	0	525	0	530	0	525	0	525	0	525	0	525	0	530	0	530	0	525	0	525	0	520	0	525	0	525	0	525	0	535	0	525	0	525	0	525	0	525	0
5.0178	0	525	0	525	0	525	0	525	0	530	0	525	0	530	0	525	0	525	0	525	0	525	0	530	0	530	0	525	0	525	0	520	0	525	0	525	0	525	0	535	0	525	0	525	0	525	0	525	0
5.0278	0	525	0	525	0	525	0	525	0	530	0	525	0	530	0	525	0	525	0	525	0	525	0	530	0	530	0	525	0	525	0	520	0	525	0	525	0	525	0	535	0	525	0	525	0	525	0	525	0
5.0378	0	525	0	525	0	525	0	525	0	530	0	525	0	530	0	525	0	525	0	525	0	525	0	530	0	530	0	525	0	525	0	520	0	525	0	525	0	525	0	535	0	525	0	525	0	525	0	525	0
5.0478	0	525	0	525	0	525	0	525	0	530	0	525	0	530	0	525	0	525	0	525	0	525	0	530	0	530	0	525	0	525	0	520	0	525	0	525	0	525	0	535	0	525	0	525	0	525	0	525	0
5.0579	0	525	0	525	0	525	0	525	0	530	0	525	0	530	0	525	0	525	0	525	0	525	0	530	0	530	0	525	0	525	0	520	0	525	0	525	0	525	0	535	0	525	0	525	0	525	0	525	0
5.0679	0	525	0	525	0	525	0	525	0	530	0	525	0	530	0	525	0	525	0	525	0	525	0	530	0	530	0	525	0	525	0	520	0	525	0	525	0	525	0	535	0	525	0	525	0	525	0	525	0
5.0779	0	525	0	525	0	525	0	525	0	530	0	525	0	530	0	525	0	525	0	525	0	525	0	530	0	530	0	525	0	525	0	520	0	525	0	525	0	525	0	535	0	525	0	525	0	525	0	525	0
5.0879	0	525	0	525	0	525	0	525	0	530	0	525	0	530	0	525	0	525	0	525	0	525	0	530	0	530	0	525	0	525	0	520	0	525	0	525	0	525	0	535	0	525	0	525	0	525	0	525	0
5.0979	0	525	0	525	0	525	0	525	0	530	0	525	0	530	0	525	0	525	0	525	0	525	0	530	0	530	0	525	0	525	0	520	0	525	0	525	0	525	0	535	0	525	0	525	0	525	0	525	0
5.1079	0	525	0	525	0	525	0	525	0	530	0	525	0	530	0	525	0	525	0	525	0	525	0	530	0	530	0	525	0	525	0	520	0	525	0	525	0	525	0	535	0	525	0	525	0	525	0	525	0
5.1179	0	525	0	525	0	525	0	525	0	530	0	525	0	530	0	525	0	525	0	525	0	525	0	530	0	530	0	525	0	525	0	520	0	525	0	525	0	525	0	535	0	525	0	525	0	525	0	525	0
5.128	0	525	0	525	0	525	0	525	0	530	0	525	0	530	0	525	0	525	0	525	0	525	0	530	0	530	0	525	0	525	0	520	0	525	0	525	0	525	0	535	0	525	0	525	0	525	0	525	0
5.138	0	525	0	525	0	525	0	525	0	530	0	525	0	530	0	525	0	525	0	525	0	525	0	530	0	530	0	525	0	525	0	520	0	525	0	525	0	525	0	535	0	525	0	525	0	525	0	525	0
5.148	0	525	0	525	0	525	0	525	0	530	0	525	0	530	0	525	0	525	0	525	0	525	0	530	0	530	0	525	0	525	0	520	0	525	0	525	0	525	0	535	0	525	0	525	0	525	0	525	0
5.158	0	525	0	525	0	525	0	525	0	530	0	525	0	530	0	525	0	525	0	525	0	525	0	530	0	530	0	525	0	525	0	520	0	525	0	525	0	525	0	535	0	525	0	525	0	525	0	525	0
5.168	0	525	0	525	0	525	0	525	0	530	0	525	0	530	0	525	0	525	0	525	0	525	0	530	0	530	0	525	0	525	0	520	0	525	0	525	0	525	0	535	0	525	0	525	0	525	0	525	0
5.178	0	525	0	525	0	525	0	525	0	530	0	525	0	530	0	525	0	525	0	525	0	525	0	530	0	530	0	525	0	525	0	520	0	525	0	525	0	525	0	535	0	525	0	525	0	525	0	525	0
5.1881	0	525	0	525	0	525	0	525	0	530	0	525	0	530	0	525	0	525	0	525	0	525	0	530	0	530	0	525	0	525	0	520	0	525	0	525	0	525	0	535	0	525	0	525	0	525	0	525	0
5.1981	0	525	0	525	0	525	0	525	0	530	0	525	0	530	0	525	0	525	0	525	0	525	0	530	0	530	0	525	0	525	0	520	0	525	0	525	0	525	0	535	0	525	0	525	0	525	0	525	0
5.2081	0	525	0	525	0	525	0	525	0	530	0	525	0	530	0	525	0	525	0	525	0	525	0	530	0	530	0	525	0	525	0	520	0	525	0	525	0	525	0	535	0	525	0	525	0	525	0	525	0
5.2181	0	525	0	525	0	525	0	525	0	530	0	525	0	530	0	525	0	525	0	525	0	525	0	530	0	530	0	525	0	525	0	520	0	525	0	525	0	525	0	535	0	525	0	525	0	525	0	525	0
5.2281	0	525	0	525	0	525	0	525	0	530	0	525	0	530	0	525	0	525	0	525	0	525	0	530	0	530	0	525	0	525	0	520	0	525	0	525	0	525	0	535	0	525	0	525	0	525	0	525	0
5.2381	0	525	0	525	0	525	0	525	0	530	0	525	0	530	0	525	0	525	0	525	0	525	0	530	0	530	0	525	0	525	0	520	0	525	0	525	0	525	0	535	0	525	0	525	0	525	0	525	0
5.2481	0	525	0	525	0	525	0	525	0	530	0	525	0	530	0	525	0	525	0	525	0	525	0	530	0	530	0	525	0	525	0	520	0	525	0	525	0	525	0	535	0	525	0	525	0	525	0	525	0
5.2582	0	525	0	525	0	525	0	525	0	530	0	525	0	530	0	525	0	525	0	525	0	525	0	530	0	530	0	525	0	525	0	520	0	525	0	525	0	525	0	535	0	525	0	525	0	525	0	525	0
5.2682	0	525	0	525	0	525	0	525	0	530	0	525	0	530	0	525	0	525	0	525	0	525	0	530	0	530	0	525	0	525	0	520	0	525	0	525	0	525	0	535	0	525	0	525	0	525	0	525	0
5.2782	0	525	0	525	0	525	0	525	0	530	0	525	0	530	0	525	0	525	0	525	0	525	0	530	0	530	0	525	0	525	0	520	0	525	0	525	0	525	0	535	0	525	0	525	0	525	0	525	0
5.2882	0	525	0	525	0	525	0	525	0	530	0	525	0	530	0	525	0	525	0	525	0	525	0	530	0	530	0	525	0	525	0	520	0	525	0	525	0	525	0	535	0	525	0	525	0	525	0	525	0
5.2982	0	525	0	525	0	525	0	525	0	530	0	525	0	530	0	525	0	525	0	525	0	525	0	530	0	530	0	525	0	525	0	520	0	525	0	525	0	525	0	535	0	525	0	525	0	525	0	525	0
5.3082	0	525	0	525	0	525	0	525	0	530	0	525	0	530	0	525	0	525	0	525	0	525	0	530	0	530	0	525	0	525	0	520	0	525	0	525	0	525	0	535	0	525	0	525	0	525	0	525	0
5.3183	0	525	0	525	0	525	0	525	0	530	0	525	0	530	0	525	0	525	0	525	0	525	0	530	0	530	0	525	0	525	0	520	0	525	0	525	0	525	0	535	0	525	0	525	0	525	0	525	0
5.3283	0	525	0	525	0	525	0	525	0	530	0	525	0	530	0	525	0	525	0	525	0	525	0	530	0	530	0	525	0	525	0	520	0	525	0	525	0	525	0	535	0	525	0	525	0	525	0	525	0
5.3383	0	525	0	525	0	525	0	525	0	530	0	525	0	530	0	525	0	525	0	525	0	525	0	530	0	530	0	525	0	525	0	520	0	525	0	525	0	525	0	535	0	525	0	525	0	525	0	525	0
5.3483	0	525	0	525	0	525	0	525	0	530	0	525	0	530	0	525	0	525	0	525	0	525	0	530	0	530	0	525	0	525	0	520	0	525	0	525	0	525	0	535	0	525	0	525	0	525	0	525	0
5.3583	0	525	0	525	0	525	0	525	0	530	0	525	0	530	0	525	0	525	0	525	0	525	0	530	0	530	0	525	0	525	0	520	0	525	0	525	0	525	0	535	0	525	0	525	0	525	0	525	0
5.3683	0	525	0	525	0	525	0	525	0	530	0	525	0	530	0	525	0	525	0	525	0	525	0	530	0	530	0	525	0	525	0	520	0	525	0	525	0	525	0	535	0	525	0	525	0	525	0	525	0
5.3783	0	525	0	525	0	525	0	525	0	530	0	525	0	530	0	525	0	525	0	525	0	525	0	530	0	530	0	525	0	525	0	520	0	525	0	525	0	525	0	535	0	525	0	525	0	525	0	525	0
5.3884	0	525	0	525	0	525	0	525	0	530	0	525	0	530	0	525	0	525	0	525	0	525	0	530	0	530	0	525	0	525	0	520	0	525	0	525	0	525	0	535	0	525	0	525	0	525	0	525	0
5.3984	0	525	0	525	0	525	0	525	0	530	0	525	0	530	0	525	0	525	0	525	0	525	0	530	0	530	0	525	0	525	0	520	0	525	0	525	0	525	0	535	0	525	0	525	0	525	0	525	0
5.4084	0	525	0	525	0	525	0	525	0	530	0	525	0	530	0	525	0	525	0	525	0	525	0	530	0	530	0	525	0	525	0	520	0	525	0	525	0	525	0	535	0	525	0	525	0	525	0	525	0
5.4184	0	525	0	525	0	525	0	525	0	530	0	525	0	530	0	525	0	525	0	525	0	525	0	530	0	530	0	525	0	525	0	520	0	525	0	525	0	525	0	535	0	525	0	525	0	525	0	525	0
5.4284	0	525	0	525	0	525	0	525	0	530	0	525	0	530	0	525	0	525	0	525	0	525	0	530	0	530	0	525	0	525	0	520	0	525	0	525	0	525	0	535	0	525	0	525	0	525	0	525	0
5.4384	0	525	0	525	0	525	0	525	0	530	0	525	0	530	0	525	0	525	0	525	0	525	0	530	0	530	0	525	0	525	0	520	0	525	0	525	0	525	0	535	0	525	0	525	0	525	0	525	0
5.4485	0	525	0	525	0	525	0	525	0	530	0	525	0	530	0	525	0	525	0	525	0	525	0	530	0	530	0	525	0	525	0	520	0	525	0	525	0	525	0	535	0	525	0	525	0	525	0	525	0
5.4585	0	525	0	525	0	525	0	525	0	530	0	525	0	530	0	525	0	525	0	525	0	525	0	530	0	530	0	525	0	525	0	520	0	525	0	525	0	525	0	535	0	525	0	525	0	525	0	525	0
5.4685	0	525	0	525	0	525	0	525	0	530	0	525	0	530	0	525	0	525	0	525	0	525	0	530	0	530	0	525	0	525	0	520	0	525	0	525	0	525	0	535	0	525	0	525	0	525	0	525	0
5.4785	0	525	0	525	0	525	0	525	0	530	0	525	0	530	0	525	0	525	0	525	0	525	0	530	0	530	0	525	0	525	0	520	0	525	0	525	0	525	0	535	0	525	0	525	0	525	0	525	0
5.4885	0	525	0	525	0	525	0	525	0	530	0	525	0	530	0	525	0	525	0	525	0	525	0	530	0	530	0	525	0	525	0	520	0	525	0	525	0	525	0	535	0	525	0	525	0	525	0	525	0
5.4985	0	525	0	525	0	525	0	525	0	530	0	525	0	530	0	525	0	525	0	525	0	525	0	530	0	530	0	525	0	525	0	520	0	525	0	525	0	525	0	535	0	525	0	525	0	525	0	525	0
5.5086	0	525	0	525	0	525	0	525	0	530	0	525	0	530	0	525	0	525	0	525	0	525	0	530	0	530	0	525	0	525	0	520	0	525	0	525	0	525	0	535	0	525	0	525	0	525	0	525	0
5.5186	0	525	0	525	0	525	0	525	0	530	0	525	0	530	0	525	0	525	0	525	0	525	0	530	0	530	0	525	0	525	0	520	0	525	0	525	0	525	0	535	0	525	0	525	0	525	0	525	0
5.5286	0	525	0	525	0	525	0	525	0	530	0	525	0	530	0	525	0	525	0	525	0	525	0	530	0	530	0	525	0	525	0	520	0	525	0	525	0	525	0	535	0	525	0	525	0	525	0	525	0
5.5386	0	525	0	525	0	525	0	525	0	530	0	525	0	530	0	525	0	525	0	525	0	525	0	530	0	530	0	525	0	525	0	520	0	525	0	525	0	525	0	535	0	525	0	525	0	525	0	525	0
5.5486	0	525	0	525	0	525	0	525	0	530	0	525	0	530	0	525	0	525	0	525	0	525	0	530	0	530	0	525	0	525	0	520	0	525	0	525	0	525	0	535	0	525	0	525	0	525	0	525	0
5.5586	0	525	0	525	0	525	0	525	0	530	0	525	0	530	0	525	0	525	0	525	0	525	0	530	0	530	0	525	0	525	0	520	0	525	0	525	0	525	0	535	0	525	0	525	0	525	0	525	0
5.5686	0	525	0	525	0	525	0	525	0	530	0	525	0	530	0	525	0	525	0	525	0	525	0	530	0	530	0	525	0	525	0	520	0	525	0	525	0	525	0	535	0	525	0	525	0	525	0	525	0
5.5787	0	525	0	525	0	525	0	525	0	530	0	525	0	530	0	525	0	525	0	525	0	525	0	530	0	530	0	525	0	525	0	520	0	525	0	525	0	525	0	535	0	525	0	525	0	525	0	525	0
5.5887	0	525	0	525	0	525	0	525	0	530	0	525	0	530	0	525	0	525	0	525	0	525	0	530	0	530	0	525	0	525	0	520	0	525	0	525	0	525	0	535	0	525	0	525	0	525	0	525	0
5.5987	0	525	0	525	0	525	0	525	0	530	0	525	0	530	0	525	0	525	0	525	0	525	0	530	0	530	0	525	0	525	0	520	0	525	0	525	0	525	0	535	0	525	0	525	0	525	0	525	0
5.6087	0	525	0	525	0	525	0	525	0	530	0	525	0	530	0	525	0	525	0	525	0	525	0	530	0	530	0	525	0	525	0	520	0	525	0	525	0	525	0	535	0	525	0	525	0	525	0	525	0
5.6187	0	525	0	525	0	525	0	525	0	530	0	525	0	530	0	525	0	525	0	525	0	525	0	530	0	530	0	525	0	525	0	520	0	525	0	525	0	525	0	535	0	525	0	525	0	525	0	525	0
5.6287	0	525	0	525	0	525	0	525	0	530	0	525	0	530	0	525	0	525	0	525	0	525	0	530	0	530	0	525	0	525	0	520	0	525	0	525	0	525	0	535	0	525	0	525	0	525	0	525	0
5.6388	0	525	0	525	0	525	0	525	0	530	0	525	0	530	0	525	0	525	0	525	0	525	0	530	0	530	0	525	0	525	0	520	0	525	0	525	0	525	0	535	0	525	0	525	0	525	0	525	0
5.6488	0	525	0	525	0	525	0	525	0	530	0	525	0	530	0	525	0	525	0	525	0	525	0	530	0	530	0	525	0	525	0	520	0	525	0	525	0	525	0	535	0	525	0	525	0	525	0	525	0
5.6588	0	525	0	525	0	525	0	525	0	530	0	525	0	530	0	525	0	525	0	525	0	525	0	530	0	530	0	525	0	525	0	520	0	525	0	525	0	525	0	535	0	525	0	525	0	525	0	525	0
5.6688	0	525	0	525	0	525	0	525	0	530	0	525	0	530	0	525	0	525	0	525	0	525	0	530	0	530	0	525	0	525	0	520	0	525	0	525	0	525	0	535	0	525	0	525	0	525	0	525	0
5.6788	0	525	0	525	0	525	0	525	0	530	0	525	0	530	0	525	0	525	0	525	0	525	0	530	0	530	0	525	0	525	0	520	0	525	0	525	0	525	0	535	0	525	0	525	0	525	0	525	0
5.6888	0	525	0	525	0	525	0	525	0	530	0	525	0	530	0	525	0	525	0	525	0	525	0	530	0	530	0	525	0	525	0	520	0	525	0	525	0	525	0	535	0	525	0	525	0	525	0	525	0
5.6988	0	525	0	525	0	525	0	525	0	530	0	525	0	530	0	525	0	525	0	525	0	525	0	530	0	530	0	525	0	525	0	520	0	525	0	525	0	525	0	535	0	525	0	525	0	525	0	525	0
5.7089	0	525	0	525	0	525	0	525	0	530	0	525	0	530	0	525	0	525	0	525	0	525	0	530	0	530	0	525	0	525	0	520	0	525	0	525	0	525	0	535	0	525	0	525	0	525	0	525	0
5.7189	0	525	0	525	0	525	0	525	0	530	0	525	0	530	0	525	0	525	0	525	0	525	0	530	0	530	0	525	0	525	0	520	0	525	0	525	0	525	0	535	0	525	0	525	0	525	0	525	0
5.7289	0	525	0	525	0	525	0	525	0	530	0	525	0	530	0	525	0	525	0	525	0	525	0	530	0	530	0	525	0	525	0	520	0	525	0	525	0	525	0	535	0	525	0	525	0	525	0	525	0
5.7389	0	525	0	525	0	525	0	525	0	530	0	525	0	530	0	525	0	525	0	525	0	525	0	530	0	530	0	525	0	525	0	520	0	525	0	525	0	525	0	535	0	525	0	525	0	525	0	525	0
5.7489	0	525	0	525	0	525	0	525	0	530	0	525	0	530	0	525	0	525	0	525	0	525	0	530	0	530	0	525	0	525	0	520	0	525	0	525	0	525	0	535	0	525	0	525	0	525	0	525	0
5.7589	0	525	0	525	0	525	0	525	0	530	0	525	0	530	0	525	0	525	0	525	0	525	0	530	0	530	0	525	0	525	0	520	0	525	0	525	0	525	0	535	0	525	0	525	0	525	0	525	0
5.769	0	525	0	525	0	525	0	525	0	530	0	525	0	530	0	525	0	525	0	525	0	525	0	530	0	530	0	525	0	525	0	520	0	525	0	525	0	525	0	535	0	525	0	525	0	525	0	525	0
5.779	0	525	0	525	0	525	0	525	0	530	0	525	0	530	0	525	0	525	0	525	0	525	0	530	0	530	0	525	0	525	0	520	0	525	0	525	0	525	0	535	0	525	0	525	0	525	0	525	0
5.789	0	525	0	525	0	525	0	525	0	530	0	525	0	530	0	525	0	525	0	525	0	525	0	530	0	530	0	525	0	525	0	520	0	525	0	525	0	525	0	535	0	525	0	525	0	525	0	525	0
5.799	0	525	0	525	0	525	0	525	0	530	0	525	0	530	0	525	0	525	0	525	0	525	0	530	0	530	0	525	0	525	0	520	0	525	0	525	0	525	0	535	0	525	0	525	0	525	0	525	0
5.809	0	525	0	525	0	525	0	525	0	530	0	525	0	530	0	525	0	525	0	525	0	525	0	530	0	530	0	525	0	525	0	520	0	525	0	525	0	525	0	535	0	525	0	525	0	525	0	525	0
5.819	0	525	0	525	0	525	0	525	0	530	0	525	0	530	0	525	0	525	0	525	0	525	0	530	0	530	0	525	0	525	0	520	0	525	0	525	0	525	0	535	0	525	0	525	0	525	0	525	0
5.829	0	525	0	525	0	525	0	525	0	530	0	525	0	530	0	525	0	525	0	525	0	525	0	530	0	530	0	525	0	525	0	520	0	525	0	525	0	525	0	535	0	525	0	525	0	525	0	525	0
5.8391	0	525	0	525	0	525	0	525	0	530	0	525	0	530	0	525	0	525	0	525	0	525	0	530	0	530	0	525	0	525	0	520	0	525	0	525	0	525	0	535	0	525	0	525	0	525	0	525	0
5.8491	0	525	0	525	0	525	0	525	0	530	0	525	0	530	0	525	0	525	0	525	0	525	0	530	0	530	0	525	0	525	0	520	0	525	0	525	0	525	0	535	0	525	0	525	0	525	0	525	0
5.8591	0	525	0	525	0	525	0	525	0	530	0	525	0	530	0	525	0	525	0	525	0	525	0	530	0	530	0	525	0	525	0	520	0	525	0	525	0	525	0	535	0	525	0	525	0	525	0	525	0
5.8691	0	525	0	525	0	525	0	525	0	530	0	525	0	530	0	525	0	525	0	525	0	525	0	530	0	530	0	525	0	525	0	520	0	525	0	525	0	525	0	535	0	525	0	525	0	525	0	525	0
5.8791	0	525	0	525	0	525	0	525	0	530	0	525	0	530	0	525	0	525	0	525	0	525	0	530	0	530	0	525	0	525	0	520	0	525	0	525	0	525	0	535	0	525	0	525	0	525	0	525	0
5.8891	0	525	0	525	0	525	0	525	0	530	0	525	0	530	0	525	0	525	0	525	0	525	0	530	0	530	0	525	0	525	0	520	0	525	0	525	0	525	0	535	0	525	0	525	0	525	0	525	0
5.8992	0	525	0	525	0	525	0	525	0	530	0	525	0	530	0	525	0	525	0	525	0	525	0	530	0	530	0	525	0	525	0	520	0	525	0	525	0	525	0	535	0	525	0	525	0	525	0	525	0
5.9092	0	525	0	525	0	525	0	525	0	530	0	525	0	530	0	525	0	525	0	525	0	525	0	530	0	530	0	525	0	525	0	520	0	525	0	525	0	525	0	535	0	525	0	525	0	525	0	525	0
5.9192	0	525	0	525	0	525	0	525	0	530	0	525	0	530	0	525	0	525	0	525	0	525	0	530	0	530	0	525	0	525	0	520	0	525	0	525	0	525	0	535	0	525	0	525	0	525	0	525	0
5.9292	0	525	0	525	0	525	0	525	0	530	0	525	0	530	0	525	0	525	0	525	0	525	0	530	0	530	0	525	0	525	0	520	0	525	0	525	0	525	0	535	0	525	0	525	0	525	0	525	0
5.9392	0	525	0	525	0	525	0	525	0	530	0	525	0	530	0	525	0	525	0	525	0	525	0	530	0	530	0	525	0	525	0	520	0	525	0	525	0	525	0	535	0	525	0	525	0	525	0	525	0
5.9492	0	525	0	525	0	525	0	525	0	530	0	525	0	530	0	525	0	525	0	525	0	525	0	530	0	530	0	525	0	525	0	520	0	525	0	525	0	525	0	535	0	525	0	525	0	525	0	525	0
5.9593	0	525	0	525	0	525	0	525	0	530	0	525	0	530	0	525	0	525	0	525	0	525	0	530	0	530	0	525	0	525	0	520	0	525	0	525	0	525	0	535	0	525	0	525	0	525	0	525	0
5.9693	0	525	0	525	0	525	0	525	0	530	0	525	0	530	0	525	0	525	0	525	0	525	0	530	0	530	0	525	0	525	0	520	0	525	0	525	0	525	0	535	0	525	0	525	0	525	0	525	0
5.9793	0	525	0	525	0	525	0	525	0	530	0	525	0	530	0	525	0	525	0	525	0	525	0	530	0	530	0	525	0	525	0	520	0	525	0	525	0	525	0	535	0	525	0	525	0	525	0	525	0
5.9893	0	525	0	525	0	525	0	525	0	530	0	525	0	530	0	525	0	525	0	525	0	525	0	530	0	530	0	525	0	525	0	520	0	525	0	525	0	525	0	535	0	525	0	525	0	525	0	525	0
5.9993	0	525	0	525	0	525	0	525	0	530	0	525	0	530	0	525	0	525	0	525	0	525	0	530	0	530	0	525	0	525	0	520	0	525	0	525	0	525	0	535	0	525	0	525	0	525	0	525	0
6.0093	0	525	0	525	0	525	0	525	0	530	0	525	0	530	0	525	0	525	0	525	0	525	0	530	0	530	0	525	0	525	0	520	0	525	0	525	0	525	0	535	0	525	0	525	0	525	0	525	0
6.0193	0	525	0	525	0	525	0	525	0	530	0	525	0	530	0	525	0	525	0	525	0	525	0	530	0	530	0	525	0	525	0	520	0	525	0	525	0	525	0	535	0	525	0	525	0	525	0	525	0
6.0294	0	525	0	525	0	525	0	525	0	530	0	525	0	530	0	525	0	525	0	525	0	525	0	530	0	530	0	525	0	525	0	520	0	525	0	525	0	525	0	535	0	525	0	525	0	525	0	525	0
6.0394	0	525	0	525	0	525	0	525	0	530	0	525	0	530	0	525	0	525	0	525	0	525	0	530	0	530	0	525	0	525	0	520	0	525	0	525	0	525	0	535	0	525	0	525	0	525	0	525	0
6.0494	0	525	0	525	0	525	0	525	0	530	0	525	0	530	0	525	0	525	0	525	0	525	0	530	0	530	0	525	0	525	0	520	0	525	0	525	0	525	0	535	0	525	0	525	0	525	0	525	0
6.0594	0	525	0	525	0	525	0	525	0	530	0	525	0	530	0	525	0	525	0	525	0	525	0	530	0	530	0	525	0	525	0	520	0	525	0	525	0	525	0	535	0	525	0	525	0	525	0	525	0
6.0694	0	525	0	525	0	525	0	525	0	530	0	525	0	530	0	525	0	525	0	525	0	525	0	530	0	530	0	525	0	525	0	520	0	525	0	525	0	525	0	535	0	525	0	525	0	525	0	525	0
6.0794	0	525	0	525	0	525	0	525	0	530	0	525	0	530	0	525	0	525	0	525	0	525	0	530	0	530	0	525	0	525	0	520	0	525	0	525	0	525	0	535	0	525	0	525	0	525	0	525	0
6.0895	0	525	0	525	0	525	0	525	0	530	0	525	0	530	0	525	0	525	0	525	0	525	0	530	0	530	0	525	0	525	0	520	0	525	0	525	0	525	0	535	0	525	0	525	0	525	0	525	0
6.0995	0	525	0	525	0	525	0	525	0	530	0	525	0	530	0	525	0	525	0	525	0	525	0	530	0	530	0	525	0	525	0	520	0	525	0	525	0	525	0	535	0	525	0	525	0	525	0	525	0
6.1095	0	525	0	525	0	525	0	525	0	530	0	525	0	530	0	525	0	525	0	525	0	525	0	530	0	530	0	525	0	525	0	520	0	525	0	525	0	525	0	535	0	525	0	525	0	525	0	525	0
6.1195	0	525	0	525	0	525	0	525	0	530	0	525	0	530	0	525	0	525	0	525	0	525	0	530	0	530	0	525	0	525	0	520	0	525	0	525	0	525	0	535	0	525	0	525	0	525	0	525	0
6.1295	0	525	0	525	0	525	0	525	0	530	0	525	0	530	0	525	0	525	0	525	0	525	0	530	0	530	0	525	0	525	0	520	0	525	0	525	0	525	0	535	0	525	0	525	0	525	0	525	0
6.1395	0	525	0	525	0	525	0	525	0	530	0	525	0	530	0	525	0	525	0	525	0	525	0	530	0	530	0	525	0	525	0	520	0	525	0	525	0	525	0	535	0	525	0	525	0	525	0	525	0
6.1495	0	525	0	525	0	525	0	525	0	530	0	525	0	530	0	525	0	525	0	525	0	525	0	530	0	530	0	525	0	525	0	520	0	525	0	525	0	525	0	535	0	525	0	525	0	525	0	525	0
6.1596	0	525	0	525	0	525	0	525	0	530	0	525	0	530	0	525	0	525	0	525	0	525	0	530	0	530	0	525	0	525	0	520	0	525	0	525	0	525	0	535	0	525	0	525	0	525	0	525	0
6.1696	0	525	0	525	0	525	0	525	0	530	0	525	0	530	0	525	0	525	0	525	0	525	0	530	0	530	0	525	0	525	0	520	0	525	0	525	0	525	0	535	0	525	0	525	0	525	0	525	0
6.1796	0	525	0	525	0	525	0	525	0	530	0	525	0	530	0	525	0	525	0	525	0	525	0	530	0	530	0	525	0	525	0	520	0	525	0	525	0	525	0	535	0	525	0	525	0	525	0	525	0
6.1896	0	525	0	525	0	525	0	525	0	530	0	525	0	530	0	525	0	525	0	525	0	525	0	530	0	530	0	525	0	525	0	520	0	525	0	525	0	525	0	535	0	525	0	525	0	525	0	525	0
6.1996	0	525	0	525	0	525	0	525	0	530	0	525	0	530	0	525	0	525	0	525	0	525	0	530	0	530	0	525	0	525	0	520	0	525	0	525	0	525	0	535	0	525	0	525	0	525	0	525	0
6.2096	0	525	0	525	0	525	0	525	0	530	0	525	0	530	0	525	0	525	0	525	0	525	0	530	0	530	0	525	0	525	0	520	0	525	0	525	0	525	0	535	0	525	0	525	0	525	0	525	0
6.2197	0	525	0	525	0	525	0	525	0	530	0	525	0	530	0	525	0	525	0	525	0	525	0	530	0	530	0	525	0	525	0	520	0	525	0	525	0	525	0	535	0	525	0	525	0	525	0	525	0
6.2297	0	525	0	525	0	525	0	525	0	530	0	525	0	530	0	525	0	525	0	525	0	525	0	530	0	530	0	525	0	525	0	520	0	525	0	525	0	525	0	535	0	525	0	525	0	525	0	525	0
6.2397	0	525	0	525	0	525	0	525	0	530	0	525	0	530	0	525	0	525	0	525	0	525	0	530	0	530	0	525	0	525	0	520	0	525	0	525	0	525	0	535	0	525	0	525	0	525	0	525	0
6.2497	0	525	0	525	0	525	0	525	0	530	0	525	0	530	0	525	0	525	0	525	0	525	0	530	0	530	0	525	0	525	0	520	0	525	0	525	0	525	0	535	0	525	0	525	0	525	0	525	0
6.2597	0	525	0	525	0	525	0	525	0	530	0	525	0	530	0	525	0	525	0	525	0	525	0	530	0	530	0	525	0	525	0	520	0	525	0	525	0	525	0	535	0	525	0	525	0	525	0	525	0
6.2697	0	525	0	525	0	525	0	525	0	530	0	525	0	530	0	525	0	525	0	525	0	525	0	530	0	530	0	525	0	525	0	520	0	525	0	525	0	525	0	535	0	525	0	525	0	525	0	525	0
6.2797	0	525	0	525	0	525	0	525	0	530	0	525	0	530	0	525	0	525	0	525	0	525	0	530	0	530	0	525	0	525	0	520	0	525	0	525	0	525	0	535	0	525	0	525	0	525	0	525	0
6.2898	0	525	0	525	0	525	0	525	0	530	0	525	0	530	0	525	0	525	0	525	0	525	0	530	0	530	0	525	0	525	0	520	0	525	0	525	0	525	0	535	0	525	0	525	0	525	0	525	0
6.2998	0	525	0	525	0	525	0	525	0	530	0	525	0	530	0	525	0	525	0	525	0	525	0	530	0	530	0	525	0	525	0	520	0	525	0	525	0	525	0	535	0	525	0	525	0	525	0	525	0
6.3098	0	525	0	525	0	525	0	525	0	530	0	525	0	530	0	525	0	525	0	525	0	525	0	530	0	530	0	525	0	525	0	520	0	525	0	525	0	525	0	535	0	525	0	525	0	525	0	525	0
6.3198	0	525	0	525	0	525	0	525	0	530	0	525	0	530	0	525	0	525	0	525	0	525	0	530	0	530	0	525	0	525	0	520	0	525	0	525	0	525	0	535	0	525	0	525	0	525	0	525	0
6.3298	0	525	0	525	0	525	0	525	0	530	0	525	0	530	0	525	0	525	0	525	0	525	0	530	0	530	0	525	0	525	0	520	0	525	0	525	0	525	0	535	0	525	0	525	0	525	0	525	0
6.3398	0	525	0	525	0	525	0	525	0	530	0	525	0	530	0	525	0	525	0	525	0	525	0	530	0	530	0	525	0	525	0	520	0	525	0	525	0	525	0	535	0	525	0	525	0	525	0	525	0
6.3499	0	525	0	525	0	525	0	525	0	530	0	525	0	530	0	525	0	525	0	525	0	525	0	530	0	530	0	525	0	525	0	520	0	525	0	525	0	525	0	535	0	525	0	525	0	525	0	525	0
6.3599	0	525	0	525	0	525	0	525	0	530	0	525	0	530	0	525	0	525	0	525	0	525	0	530	0	530	0	525	0	525	0	520	0	525	0	525	0	525	0	535	0	525	0	525	0	525	0	525	0
6.3699	0	525	0	525	0	525	0	525	0	530	0	525	0	530	0	525	0	525	0	525	0	525	0	530	0	530	0	525	0	525	0	520	0	525	0	525	0	525	0	535	0	525	0	525	0	525	0	525	0
6.3799	0	525	0	525	0	525	0	525	0	530	0	525	0	530	0	525	0	525	0	525	0	525	0	530	0	530	0	525	0	525	0	520	0	525	0	525	0	525	0	535	0	525	0	525	0	525	0	525	0
6.3899	0	525	0	525	0	525	0	525	0	530	0	525	0	530	0	525	0	525	0	525	0	525	0	530	0	530	0	525	0	525	0	520	0	525	0	525	0	525	0	535	0	525	0	525	0	525	0	525	0
6.3999	0	525	0	525	0	525	0	525	0	530	0	525	0	530	0	525	0	525	0	525	0	525	0	530	0	530	0	525	0	525	0	520	0	525	0	525	0	525	0	535	0	525	0	525	0	525	0	525	0
6.41	0	525	0	525	0	525	0	525	0	530	0	525	0	530	0	525	0	525	0	525	0	525	0	530	0	530	0	525	0	525	0	520	0	525	0	525	0	525	0	535	0	525	0	525	0	525	0	525	0
6.42	0	525	0	525	0	525	0	525	0	530	0	525	0	530	0	525	0	525	0	525	0	525	0	530	0	530	0	525	0	525	0	520	0	525	0	525	0	525	0	535	0	525	0	525	0	525	0	525	0
6.43	0	525	0	525	0	525	0	525	0	530	0	525	0	530	0	525	0	525	0	525	0	525	0	530	0	530	0	525	0	525	0	520	0	525	0	525	0	525	0	535	0	525	0	525	0	525	0	525	0
6.44	0	525	0	525	0	525	0	525	0	530	0	525	0	530	0	525	0	525	0	525	0	525	0	530	0	530	0	525	0	525	0	520	0	525	0	525	0	525	0	535	0	525	0	525	0	525	0	525	0
6.45	0	525	0	525	0	525	0	525	0	530	0	525	0	530	0	525	0	525	0	525	0	525	0	530	0	530	0	525	0	525	0	520	0	525	0	525	0	525	0	535	0	525	0	525	0	525	0	525	0
6.46	0	525	0	525	0	525	0	525	0	530	0	525	0	530	0	525	0	525	0	525	0	525	0	530	0	530	0	525	0	525	0	520	0	525	0	525	0	525	0	535	0	525	0	525	0	525	0	525	0
6.47	0	525	0	525	0	525	0	525	0	530	0	525	0	530	0	525	0	525	0	525	0	525	0	530	0	530	0	525	0	525	0	520	0	525	0	525	0	525	0	535	0	525	0	525	0	525	0	525	0
6.4801	0	525	0	525	0	525	0	525	0	530	0	525	0	530	0	525	0	525	0	525	0	525	0	530	0	530	0	525	0	525	0	520	0	525	0	525	0	525	0	535	0	525	0	525	0	525	0	525	0
6.4901	0	525	0	525	0	525	0	525	0	530	0	525	0	530	0	525	0	525	0	525	0	525	0	530	0	530	0	525	0	525	0	520	0	525	0	525	0	525	0	535	0	525	0	525	0	525	0	525	0
6.5001	0	525	0	525	0	525	0	525	0	530	0	525	0	530	0	525	0	525	0	525	0	525	0	530	0	530	0	525	0	525	0	520	0	525	0	525	0	525	0	535	0	525	0	525	0	525	0	525	0
6.5101	0	525	0	525	0	525	0	525	0	530	0	525	0	530	0	525	0	525	0	525	0	525	0	530	0	530	0	525	0	525	0	520	0	525	0	525	0	525	0	535	0	525	0	525	0	525	0	525	0
6.5201	0	525	0	525	0	525	0	525	0	530	0	525	0	530	0	525	0	525	0	525	0	525	0	530	0	530	0	525	0	525	0	520	0	525	0	525	0	525	0	535	0	525	0	525	0	525	0	525	0
6.5301	0	525	0	525	0	525	0	525	0	530	0	525	0	530	0	525	0	525	0	525	0	525	0	530	0	530	0	525	0	525	0	520	0	525	0	525	0	525	0	535	0	525	0	525	0	525	0	525	0
6.5402	0	525	0	525	0	525	0	525	0	530	0	525	0	530	0	525	0	525	0	525	0	525	0	530	0	530	0	525	0	525	0	520	0	525	0	525	0	525	0	535	0	525	0	525	0	525	0	525	0
6.5502	0	525	0	525	0	525	0	525	0	530	0	525	0	530	0	525	0	525	0	525	0	525	0	530	0	530	0	525	0	525	0	520	0	525	0	525	0	525	0	535	0	525	0	525	0	525	0	525	0
6.5602	0	525	0	525	0	525	0	525	0	530	0	525	0	530	0	525	0	525	0	525	0	525	0	530	0	530	0	525	0	525	0	520	0	525	0	525	0	525	0	535	0	525	0	525	0	525	0	525	0
6.5702	0	525	0	525	0	525	0	525	0	530	0	525	0	530	0	525	0	525	0	525	0	525	0	530	0	530	0	525	0	525	0	520	0	525	0	525	0	525	0	535	0	525	0	525	0	525	0	525	0
6.5802	0	525	0	525	0	525	0	525	0	530	0	525	0	530	0	525	0	525	0	525	0	525	0	530	0	530	0	525	0	525	0	520	0	525	0	525	0	525	0	535	0	525	0	525	0	525	0	525	0
6.5902	0	525	0	525	0	525	0	525	0	530	0	525	0	530	0	525	0	525	0	525	0	525	0	530	0	530	0	525	0	525	0	520	0	525	0	525	0	525	0	535	0	525	0	525	0	525	0	525	0
6.6002	0	525	0	525	0	525	0	525	0	530	0	525	0	530	0	525	0	525	0	525	0	525	0	530	0	530	0	525	0	525	0	520	0	525	0	525	0	525	0	535	0	525	0	525	0	525	0	525	0
6.6103	0	525	0	525	0	525	0	525	0	530	0	525	0	530	0	525	0	525	0	525	0	525	0	530	0	530	0	525	0	525	0	520	0	525	0	525	0	525	0	535	0	525	0	525	0	525	0	525	0
6.6203	0	525	0	525	0	525	0	525	0	530	0	525	0	530	0	525	0	525	0	525	0	525	0	530	0	530	0	525	0	525	0	520	0	525	0	525	0	525	0	535	0	525	0	525	0	525	0	525	0
6.6303	0	525	0	525	0	525	0	525	0	530	0	525	0	530	0	525	0	525	0	525	0	525	0	530	0	530	0	525	0	525	0	520	0	525	0	525	0	525	0	535	0	525	0	525	0	525	0	525	0
6.6403	0	525	0	525	0	525	0	525	0	530	0	525	0	530	0	525	0	525	0	525	0	525	0	530	0	530	0	525	0	525	0	520	0	525	0	525	0	525	0	535	0	525	0	525	0	525	0	525	0
6.6503	0	525	0	525	0	525	0	525	0	530	0	525	0	530	0	525	0	525	0	525	0	525	0	530	0	530	0	525	0	525	0	520	0	525	0	525	0	525	0	535	0	525	0	525	0	525	0	525	0
6.6603	0	525	0	525	0	525	0	525	0	530	0	525	0	530	0	525	0	525	0	525	0	525	0	530	0	530	0	525	0	525	0	520	0	525	0	525	0	525	0	535	0	525	0	525	0	525	0	525	0
6.6704	0	525	0	525	0	525	0	525	0	530	0	525	0	530	0	525	0	525	0	525	0	525	0	530	0	530	0	525	0	525	0	520	0	525	0	525	0	525	0	535	0	525	0	525	0	525	0	525	0
6.6804	0	525	0	525	0	525	0	525	0	530	0	525	0	530	0	525	0	525	0	525	0	525	0	530	0	530	0	525	0	525	0	520	0	525	0	525	0	525	0	535	0	525	0	525	0	525	0	525	0
6.6904	0	525	0	525	0	525	0	525	0	530	0	525	0	530	0	525	0	525	0	525	0	525	0	530	0	530	0	525	0	525	0	520	0	525	0	525	0	525	0	535	0	525	0	525	0	525	0	525	0
6.7004	0	525	0	525	0	525	0	525	0	530	0	525	0	530	0	525	0	525	0	525	0	525	0	530	0	530	0	525	0	525	0	520	0	525	0	525	0	525	0	535	0	525	0	525	0	525	0	525	0
6.7104	0	525	0	525	0	525	0	525	0	530	0	525	0	530	0	525	0	525	0	525	0	525	0	530	0	530	0	525	0	525	0	520	0	525	0	525	0	525	0	535	0	525	0	525	0	525	0	525	0
6.7204	0	525	0	525	0	525	0	525	0	530	0	525	0	530	0	525	0	525	0	525	0	525	0	530	0	530	0	525	0	525	0	520	0	525	0	525	0	525	0	535	0	525	0	525	0	525	0	525	0
6.7304	0	525	0	525	0	525	0	525	0	530	0	525	0	530	0	525	0	525	0	525	0	525	0	530	0	530	0	525	0	525	0	520	0	525	0	525	0	525	0	535	0	525	0	525	0	525	0	525	0
6.7405	0	525	0	525	0	525	0	525	0	530	0	525	0	530	0	525	0	525	0	525	0	525	0	530	0	530	0	525	0	525	0	520	0	525	0	525	0	525	0	535	0	525	0	525	0	525	0	525	0
6.7505	0	525	0	525	0	525	0	525	0	530	0	525	0	530	0	525	0	525	0	525	0	525	0	530	0	530	0	525	0	525	0	520	0	525	0	525	0	525	0	535	0	525	0	525	0	525	0	525	0
6.7605	0	525	0	525	0	525	0	525	0	530	0	525	0	530	0	525	0	525	0	525	0	525	0	530	0	530	0	525	0	525	0	520	0	525	0	525	0	525	0	535	0	525	0	525	0	525	0	525	0
6.7705	0	525	0	525	0	525	0	525	0	530	0	525	0	530	0	525	0	525	0	525	0	525	0	530	0	530	0	525	0	525	0	520	0	525	0	525	0	525	0	535	0	525	0	525	0	525	0	525	0
6.7805	0	525	0	525	0	525	0	525	0	530	0	525	0	530	0	525	0	525	0	525	0	525	0	530	0	530	0	525	0	525	0	520	0	525	0	525	0	525	0	535	0	525	0	525	0	525	0	525	0
6.7905	0	525	0	525	0	525	0	525	0	530	0	525	0	530	0	525	0	525	0	525	0	525	0	530	0	530	0	525	0	525	0	520	0	525	0	525	0	525	0	535	0	525	0	525	0	525	0	525	0
6.8006	0	525	0	525	0	525	0	525	0	530	0	525	0	530	0	525	0	525	0	525	0	525	0	530	0	530	0	525	0	525	0	520	0	525	0	525	0	525	0	535	0	525	0	525	0	525	0	525	0
6.8106	0	525	0	525	0	525	0	525	0	530	0	525	0	530	0	525	0	525	0	525	0	525	0	530	0	530	0	525	0	525	0	520	0	525	0	525	0	525	0	535	0	525	0	525	0	525	0	525	0
6.8206	0	525	0	525	0	525	0	525	0	530	0	525	0	530	0	525	0	525	0	525	0	525	0	530	0	530	0	525	0	525	0	520	0	525	0	525	0	525	0	535	0	525	0	525	0	525	0	525	0
6.8306	0	525	0	525	0	525	0	525	0	530	0	525	0	530	0	525	0	525	0	525	0	525	0	530	0	530	0	525	0	525	0	520	0	525	0	525	0	525	0	535	0	525	0	525	0	525	0	525	0
6.8406	0	525	0	525	0	525	0	525	0	530	0	525	0	530	0	525	0	525	0	525	0	525	0	530	0	530	0	525	0	525	0	520	0	525	0	525	0	525	0	535	0	525	0	525	0	525	0	525	0
6.8506	0	525	0	525	0	525	0	525	0	530	0	525	0	530	0	525	0	525	0	525	0	525	0	530	0	530	0	525	0	525	0	520	0	525	0	525	0	525	0	535	0	525	0	525	0	525	0	525	0
6.8607	0	525	0	525	0	525	0	525	0	530	0	525	0	530	0	525	0	525	0	525	0	525	0	530	0	530	0	525	0	525	0	520	0	525	0	525	0	525	0	535	0	525	0	525	0	525	0	525	0
6.8707	0	525	0	525	0	525	0	525	0	530	0	525	0	530	0	525	0	525	0	525	0	525	0	530	0	530	0	525	0	525	0	520	0	525	0	525	0	525	0	535	0	525	0	525	0	525	0	525	0
6.8807	0	525	0	525	0	525	0	525	0	530	0	525	0	530	0	525	0	525	0	525	0	525	0	530	0	530	0	525	0	525	0	520	0	525	0	525	0	525	0	535	0	525	0	525	0	525	0	525	0
6.8907	0	525	0	525	0	525	0	525	0	530	0	525	0	530	0	525	0	525	0	525	0	525	0	530	0	530	0	525	0	525	0	520	0	525	0	525	0	525	0	535	0	525	0	525	0	525	0	525	0
6.9007	0	525	0	525	0	525	0	525	0	530	0	525	0	530	0	525	0	525	0	525	0	525	0	530	0	530	0	525	0	525	0	520	0	525	0	525	0	525	0	535	0	525	0	525	0	525	0	525	0
6.9107	0	525	0	525	0	525	0	525	0	530	0	525	0	530	0	525	0	525	0	525	0	525	0	530	0	530	0	525	0	525	0	520	0	525	0	525	0	525	0	535	0	525	0	525	0	525	0	525	0
6.9207	0	525	0	525	0	525	0	525	0	530	0	525	0	530	0	525	0	525	0	525	0	525	0	530	0	530	0	525	0	525	0	520	0	525	0	525	0	525	0	535	0	525	0	525	0	525	0	525	0
6.9308	0	525	0	525	0	525	0	525	0	530	0	525	0	530	0	525	0	525	0	525	0	525	0	530	0	530	0	525	0	525	0	520	0	525	0	525	0	525	0	535	0	525	0	525	0	525	0	525	0
6.9408	0	525	0	525	0	525	0	525	0	530	0	525	0	530	0	525	0	525	0	525	0	525	0	530	0	530	0	525	0	525	0	520	0	525	0	525	0	525	0	535	0	525	0	525	0	525	0	525	0
6.9508	0	525	0	525	0	525	0	525	0	530	0	525	0	530	0	525	0	525	0	525	0	525	0	530	0	530	0	525	0	525	0	520	0	525	0	525	0	525	0	535	0	525	0	525	0	525	0	525	0
6.9608	0	525	0	525	0	525	0	525	0	530	0	525	0	530	0	525	0	525	0	525	0	525	0	530	0	530	0	525	0	525	0	520	0	525	0	525	0	525	0	535	0	525	0	525	0	525	0	525	0
6.9708	0	525	0	525	0	525	0	525	0	530	0	525	0	530	0	525	0	525	0	525	0	525	0	530	0	530	0	525	0	525	0	520	0	525	0	525	0	525	0	535	0	525	0	525	0	525	0	525	0
6.9808	0	525	0	525	0	525	0	525	0	530	0	525	0	530	0	525	0	525	0	525	0	525	0	530	0	530	0	525	0	525	0	520	0	525	0	525	0	525	0	535	0	525	0	525	0	525	0	525	0
6.9909	0	525	0	525	0	525	0	525	0	530	0	525	0	530	0	525	0	525	0	525	0	525	0	530	0	530	0	525	0	525	0	520	0	525	0	525	0	525	0	535	0	525	0	525	0	525	0	525	0
7.0009	0	525	0	525	0	525	0	525	0	530	0	525	0	530	0	525	0	525	0	525	0	525	0	530	0	530	0	525	0	525	0	520	0	525	0	525	0	525	0	535	0	525	0	525	0	525	0	525	0
7.0109	0	525	0	525	0	525	0	525	0	530	0	525	0	530	0	525	0	525	0	525	0	525	0	530	0	530	0	525	0	525	0	520	0	525	0	525	0	525	0	535	0	525	0	525	0	525	0	525	0
7.0209	0	525	0	525	0	525	0	525	0	530	0	525	0	530	0	525	0	525	0	525	0	525	0	530	0	530	0	525	0	525	0	520	0	525	0	525	0	525	0	535	0	525	0	525	0	525	0	525	0
7.0309	0	525	0	525	0	525	0	525	0	530	0	525	0	530	0	525	0	525	0	525	0	525	0	530	0	530	0	525	0	525	0	520	0	525	0	525	0	525	0	535	0	525	0	525	0	525	0	525	0
7.0409	0	525	0	525	0	525	0	525	0	530	0	525	0	530	0	525	0	525	0	525	0	525	0	530	0	530	0	525	0	525	0	520	0	525	0	525	0	525	0	535	0	525	0	525	0	525	0	525	0
7.0509	0	525	0	525	0	525	0	525	0	530	0	525	0	530	0	525	0	525	0	525	0	525	0	530	0	530	0	525	0	525	0	520	0	525	0	525	0	525	0	535	0	525	0	525	0	525	0	525	0
7.061	0	525	0	525	0	525	0	525	0	530	0	525	0	530	0	525	0	525	0	525	0	525	0	530	0	530	0	525	0	525	0	520	0	525	0	525	0	525	0	535	0	525	0	525	0	525	0	525	0
7.071	0	525	0	525	0	525	0	525	0	530	0	525	0	530	0	525	0	525	0	525	0	525	0	530	0	530	0	525	0	525	0	520	0	525	0	525	0	525	0	535	0	525	0	525	0	525	0	525	0
7.081	0	525	0	525	0	525	0	525	0	530	0	525	0	530	0	525	0	525	0	525	0	525	0	530	0	530	0	525	0	525	0	520	0	525	0	525	0	525	0	535	0	525	0	525	0	525	0	525	0
7.091	0	525	0	525	0	525	0	525	0	530	0	525	0	530	0	525	0	525	0	525	0	525	0	530	0	530	0	525	0	525	0	520	0	525	0	525	0	525	0	535	0	525	0	525	0	525	0	525	0
7.101	0	525	0	525	0	525	0	525	0	530	0	525	0	530	0	525	0	525	0	525	0	525	0	530	0	530	0	525	0	525	0	520	0	525	0	525	0	525	0	535	0	525	0	525	0	525	0	525	0
7.111	0	525	0	525	0	525	0	525	0	530	0	525	0	530	0	525	0	525	0	525	0	525	0	530	0	530	0	525	0	525	0	520	0	525	0	525	0	525	0	535	0	525	0	525	0	525	0	525	0
7.1211	0	525	0	525	0	525	0	525	0	530	0	525	0	530	0	525	0	525	0	525	0	525	0	530	0	530	0	525	0	525	0	520	0	525	0	525	0	525	0	535	0	525	0	525	0	525	0	525	0
7.1311	0	525	0	525	0	525	0	525	0	530	0	525	0	530	0	525	0	525	0	525	0	525	0	530	0	530	0	525	0	525	0	520	0	525	0	525	0	525	0	535	0	525	0	525	0	525	0	525	0
7.1411	0	525	0	525	0	525	0	525	0	530	0	525	0	530	0	525	0	525	0	525	0	525	0	530	0	530	0	525	0	525	0	520	0	525	0	525	0	525	0	535	0	525	0	525	0	525	0	525	0
7.1511	0	525	0	525	0	525	0	525	0	530	0	525	0	530	0	525	0	525	0	525	0	525	0	530	0	530	0	525	0	525	0	520	0	525	0	525	0	525	0	535	0	525	0	525	0	525	0	525	0
7.1611	0	525	0	525	0	525	0	525	0	530	0	525	0	530	0	525	0	525	0	525	0	525	0	530	0	530	0	525	0	525	0	520	0	525	0	525	0	525	0	535	0	525	0	525	0	525	0	525	0
7.1711	0	525	0	525	0	525	0	525	0	530	0	525	0	530	0	525	0	525	0	525	0	525	0	530	0	530	0	525	0	525	0	520	0	525	0	525	0	525	0	535	0	525	0	525	0	525	0	525	0
7.1811	0	525	0	525	0	525	0	525	0	530	0	525	0	530	0	525	0	525	0	525	0	525	0	530	0	530	0	525	0	525	0	520	0	525	0	525	0	525	0	535	0	525	0	525	0	525	0	525	0
7.1912	0	525	0	525	0	525	0	525	0	530	0	525	0	530	0	525	0	525	0	525	0	525	0	530	0	530	0	525	0	525	0	520	0	525	0	525	0	525	0	535	0	525	0	525	0	525	0	525	0
7.2012	0	525	0	525	0	525	0	525	0	530	0	525	0	530	0	525	0	525	0	525	0	525	0	530	0	530	0	525	0	525	0	520	0	525	0	525	0	525	0	535	0	525	0	525	0	525	0	525	0
7.2112	0	525	0	525	0	525	0	525	0	530	0	525	0	530	0	525	0	525	0	525	0	525	0	530	0	530	0	525	0	525	0	520	0	525	0	525	0	525	0	535	0	525	0	525	0	525	0	525	0
7.2212	0	525	0	525	0	525	0	525	0	530	0	525	0	530	0	525	0	525	0	525	0	525	0	530	0	530	0	525	0	525	0	520	0	525	0	525	0	525	0	535	0	525	0	525	0	525	0	525	0
7.2312	0	525	0	525	0	525	0	525	0	530	0	525	0	530	0	525	0	525	0	525	0	525	0	530	0	530	0	525	0	525	0	520	0	525	0	525	0	525	0	535	0	525	0	525	0	525	0	525	0
7.2412	0	525	0	525	0	525	0	525	0	530	0	525	0	530	0	525	0	525	0	525	0	525	0	530	0	530	0	525	0	525	0	520	0	525	0	525	0	525	0	535	0	525	0	525	0	525	0	525	0
7.2513	0	525	0	525	0	525	0	525	0	530	0	525	0	530	0	525	0	525	0	525	0	525	0	530	0	530	0	525	0	525	0	520	0	525	0	525	0	525	0	535	0	525	0	525	0	525	0	525	0
7.2613	0	525	0	525	0	525	0	525	0	530	0	525	0	530	0	525	0	525	0	525	0	525	0	530	0	530	0	525	0	525	0	520	0	525	0	525	0	525	0	535	0	525	0	525	0	525	0	525	0
7.2713	0	525	0	525	0	525	0	525	0	530	0	525	0	530	0	525	0	525	0	525	0	525	0	530	0	530	0	525	0	525	0	520	0	525	0	525	0	525	0	535	0	525	0	525	0	525	0	525	0
7.2813	0	525	0	525	0	525	0	525	0	530	0	525	0	530	0	525	0	525	0	525	0	525	0	530	0	530	0	525	0	525	0	520	0	525	0	525	0	525	0	535	0	525	0	525	0	525	0	525	0
7.2913	0	525	0	525	0	525	0	525	0	530	0	525	0	530	0	525	0	525	0	525	0	525	0	530	0	530	0	525	0	525	0	520	0	525	0	525	0	525	0	535	0	525	0	525	0	525	0	525	0
7.3013	0	525	0	525	0	525	0	525	0	530	0	525	0	530	0	525	0	525	0	525	0	525	0	530	0	530	0	525	0	525	0	520	0	525	0	525	0	525	0	535	0	525	0	525	0	525	0	525	0
7.3113	0	525	0	525	0	525	0	525	0	530	0	525	0	530	0	525	0	525	0	525	0	525	0	530	0	530	0	525	0	525	0	520	0	525	0	525	0	525	0	535	0	525	0	525	0	525	0	525	0
7.3214	0	525	0	525	0	525	0	525	0	530	0	525	0	530	0	525	0	525	0	525	0	525	0	530	0	530	0	525	0	525	0	520	0	525	0	525	0	525	0	535	0	525	0	525	0	525	0	525	0
7.3314	0	525	0	525	0	525	0	525	0	530	0	525	0	530	0	525	0	525	0	525	0	525	0	530	0	530	0	525	0	525	0	520	0	525	0	525	0	525	0	535	0	525	0	525	0	525	0	525	0
7.3414	0	525	0	525	0	525	0	525	0	530	0	525	0	530	0	525	0	525	0	525	0	525	0	530	0	530	0	525	0	525	0	520	0	525	0	525	0	525	0	535	0	525	0	525	0	525	0	525	0
7.3514	0	525	0	525	0	525	0	525	0	530	0	525	0	530	0	525	0	525	0	525	0	525	0	530	0	530	0	525	0	525	0	520	0	525	0	525	0	525	0	535	0	525	0	525	0	525	0	525	0
7.3614	0	525	0	525	0	525	0	525	0	530	0	525	0	530	0	525	0	525	0	525	0	525	0	530	0	530	0	525	0	525	0	520	0	525	0	525	0	525	0	535	0	525	0	525	0	525	0	525	0
7.3714	0	525	0	525	0	525	0	525	0	530	0	525	0	530	0	525	0	525	0	525	0	525	0	530	0	530	0	525	0	525	0	520	0	525	0	525	0	525	0	535	0	525	0	525	0	525	0	525	0
7.3815	0	525	0	525	0	525	0	525	0	530	0	525	0	530	0	525	0	525	0	525	0	525	0	530	0	530	0	525	0	525	0	520	0	525	0	525	0	525	0	535	0	525	0	525	0	525	0	525	0
7.3915	0	525	0	525	0	525	0	525	0	530	0	525	0	530	0	525	0	525	0	525	0	525	0	530	0	530	0	525	0	525	0	520	0	525	0	525	0	525	0	535	0	525	0	525	0	525	0	525	0
7.4015	0	525	0	525	0	525	0	525	0	530	0	525	0	530	0	525	0	525	0	525	0	525	0	530	0	530	0	525	0	525	0	520	0	525	0	525	0	525	0	535	0	525	0	525	0	525	0	525	0
7.4115	0	525	0	525	0	525	0	525	0	530	0	525	0	530	0	525	0	525	0	525	0	525	0	530	0	530	0	525	0	525	0	520	0	525	0	525	0	525	0	535	0	525	0	525	0	525	0	525	0
7.4215	0	525	0	525	0	525	0	525	0	530	0	525	0	530	0	525	0	525	0	525	0	525	0	530	0	530	0	525	0	525	0	520	0	525	0	525	0	525	0	535	0	525	0	525	0	525	0	525	0
7.4315	0	525	0	525	0	525	0	525	0	530	0	525	0	530	0	525	0	525	0	525	0	525	0	530	0	530	0	525	0	525	0	520	0	525	0	525	0	525	0	535	0	525	0	525	0	525	0	525	0
7.4416	0	525	0	525	0	525	0	525	0	530	0	525	0	530	0	525	0	525	0	525	0	525	0	530	0	530	0	525	0	525	0	520	0	525	0	525	0	525	0	535	0	525	0	525	0	525	0	525	0
7.4516	0	525	0	525	0	525	0	525	0	530	0	525	0	530	0	525	0	525	0	525	0	525	0	530	0	530	0	525	0	525	0	520	0	525	0	525	0	525	0	535	0	525	0	525	0	525	0	525	0
7.4616	0	525	0	525	0	525	0	525	0	530	0	525	0	530	0	525	0	525	0	525	0	525	0	530	0	530	0	525	0	525	0	520	0	525	0	525	0	525	0	535	0	525	0	525	0	525	0	525	0
7.4716	0	525	0	525	0	525	0	525	0	530	0	525	0	530	0	525	0	525	0	525	0	525	0	530	0	530	0	525	0	525	0	520	0	525	0	525	0	525	0	535	0	525	0	525	0	525	0	525	0
7.4816	0	525	0	525	0	525	0	525	0	530	0	525	0	530	0	525	0	525	0	525	0	525	0	530	0	530	0	525	0	525	0	520	0	525	0	525	0	525	0	535	0	525	0	525	0	525	0	525	0
7.4916	0	525	0	525	0	525	0	525	0	530	0	525	0	530	0	525	0	525	0	525	0	525	0	530	0	530	0	525	0	525	0	520	0	525	0	525	0	525	0	535	0	525	0	525	0	525	0	525	0
7.5016	0	525	0	525	0	525	0	525	0	530	0	525	0	530	0	525	0	525	0	525	0	525	0	530	0	530	0	525	0	525	0	520	0	525	0	525	0	525	0	535	0	525	0	525	0	525	0	525	0
7.5117	0	525	0	525	0	525	0	525	0	530	0	525	0	530	0	525	0	525	0	525	0	525	0	530	0	530	0	525	0	525	0	520	0	525	0	525	0	525	0	535	0	525	0	525	0	525	0	525	0
7.5217	0	525	0	525	0	525	0	525	0	530	0	525	0	530	0	525	0	525	0	525	0	525	0	530	0	530	0	525	0	525	0	520	0	525	0	525	0	525	0	535	0	525	0	525	0	525	0	525	0
7.5317	0	525	0	525	0	525	0	525	0	530	0	525	0	530	0	525	0	525	0	525	0	525	0	530	0	530	0	525	0	525	0	520	0	525	0	525	0	525	0	535	0	525	0	525	0	525	0	525	0
7.5417	0	525	0	525	0	525	0	525	0	530	0	525	0	530	0	525	0	525	0	525	0	525	0	530	0	530	0	525	0	525	0	520	0	525	0	525	0	525	0	535	0	525	0	525	0	525	0	525	0
7.5517	0	525	0	525	0	525	0	525	0	530	0	525	0	530	0	525	0	525	0	525	0	525	0	530	0	530	0	525	0	525	0	520	0	525	0	525	0	525	0	535	0	525	0	525	0	525	0	525	0
7.5617	0	525	0	525	0	525	0	525	0	530	0	525	0	530	0	525	0	525	0	525	0	525	0	530	0	530	0	525	0	525	0	520	0	525	0	525	0	525	0	535	0	525	0	525	0	525	0	525	0
7.5718	0	525	0	525	0	525	0	525	0	530	0	525	0	530	0	525	0	525	0	525	0	525	0	530	0	530	0	525	0	525	0	520	0	525	0	525	0	525	0	535	0	525	0	525	0	525	0	525	0
7.5818	0	525	0	525	0	525	0	525	0	530	0	525	0	530	0	525	0	525	0	525	0	525	0	530	0	530	0	525	0	525	0	520	0	525	0	525	0	525	0	535	0	525	0	525	0	525	0	525	0
7.5918	0	525	0	525	0	525	0	525	0	530	0	525	0	530	0	525	0	525	0	525	0	525	0	530	0	530	0	525	0	525	0	520	0	525	0	525	0	525	0	535	0	525	0	525	0	525	0	525	0
7.6018	0	525	0	525	0	525	0	525	0	530	0	525	0	530	0	525	0	525	0	525	0	525	0	530	0	530	0	525	0	525	0	520	0	525	0	525	0	525	0	535	0	525	0	525	0	525	0	525	0
7.6118	0	525	0	525	0	525	0	525	0	530	0	525	0	530	0	525	0	525	0	525	0	525	0	530	0	530	0	525	0	525	0	520	0	525	0	525	0	525	0	535	0	525	0	525	0	525	0	525	0
7.6218	0	525	0	525	0	525	0	525	0	530	0	525	0	530	0	525	0	525	0	525	0	525	0	530	0	530	0	525	0	525	0	520	0	525	0	525	0	525	0	535	0	525	0	525	0	525	0	525	0
7.6318	0	525	0	525	0	525	0	525	0	530	0	525	0	530	0	525	0	525	0	525	0	525	0	530	0	530	0	525	0	525	0	520	0	525	0	525	0	525	0	535	0	525	0	525	0	525	0	525	0
7.6419	0	525	0	525	0	525	0	525	0	530	0	525	0	530	0	525	0	525	0	525	0	525	0	530	0	530	0	525	0	525	0	520	0	525	0	525	0	525	0	535	0	525	0	525	0	525	0	525	0
7.6519	0	525	0	525	0	525	0	525	0	530	0	525	0	530	0	525	0	525	0	525	0	525	0	530	0	530	0	525	0	525	0	520	0	525	0	525	0	525	0	535	0	525	0	525	0	525	0	525	0
7.6619	0	525	0	525	0	525	0	525	0	530	0	525	0	530	0	525	0	525	0	525	0	525	0	530	0	530	0	525	0	525	0	520	0	525	0	525	0	525	0	535	0	525	0	525	0	525	0	525	0
7.6719	0	525	0	525	0	525	0	525	0	530	0	525	0	530	0	525	0	525	0	525	0	525	0	530	0	530	0	525	0	525	0	520	0	525	0	525	0	525	0	535	0	525	0	525	0	525	0	525	0
7.6819	0	525	0	525	0	525	0	525	0	530	0	525	0	530	0	525	0	525	0	525	0	525	0	530	0	530	0	525	0	525	0	520	0	525	0	525	0	525	0	535	0	525	0	525	0	525	0	525	0
7.6919	0	525	0	525	0	525	0	525	0	530	0	525	0	530	0	525	0	525	0	525	0	525	0	530	0	530	0	525	0	525	0	520	0	525	0	525	0	525	0	535	0	525	0	525	0	525	0	525	0
7.702	0	525	0	525	0	525	0	525	0	530	0	525	0	530	0	525	0	525	0	525	0	525	0	530	0	530	0	525	0	525	0	520	0	525	0	525	0	525	0	535	0	525	0	525	0	525	0	525	0
7.712	0	525	0	525	0	525	0	525	0	530	0	525	0	530	0	525	0	525	0	525	0	525	0	530	0	530	0	525	0	525	0	520	0	525	0	525	0	525	0	535	0	525	0	525	0	525	0	525	0
7.722	0	525	0	525	0	525	0	525	0	530	0	525	0	530	0	525	0	525	0	525	0	525	0	530	0	530	0	525	0	525	0	520	0	525	0	525	0	525	0	535	0	525	0	525	0	525	0	525	0
7.732	0	525	0	525	0	525	0	525	0	530	0	525	0	530	0	525	0	525	0	525	0	525	0	530	0	530	0	525	0	525	0	520	0	525	0	525	0	525	0	535	0	525	0	525	0	525	0	525	0
7.742	0	525	0	525	0	525	0	525	0	530	0	525	0	530	0	525	0	525	0	525	0	525	0	530	0	530	0	525	0	525	0	520	0	525	0	525	0	525	0	535	0	525	0	525	0	525	0	525	0
7.752	0	525	0	525	0	525	0	525	0	530	0	525	0	530	0	525	0	525	0	525	0	525	0	530	0	530	0	525	0	525	0	520	0	525	0	525	0	525	0	535	0	525	0	525	0	525	0	525	0
7.762	0	525	0	525	0	525	0	525	0	530	0	525	0	530	0	525	0	525	0	525	0	525	0	530	0	530	0	525	0	525	0	520	0	525	0	525	0	525	0	535	0	525	0	525	0	525	0	525	0
7.7721	0	525	0	525	0	525	0	525	0	530	0	525	0	530	0	525	0	525	0	525	0	525	0	530	0	530	0	525	0	525	0	520	0	525	0	525	0	525	0	535	0	525	0	525	0	525	0	525	0
7.7821	0	525	0	525	0	525	0	525	0	530	0	525	0	530	0	525	0	525	0	525	0	525	0	530	0	530	0	525	0	525	0	520	0	525	0	525	0	525	0	535	0	525	0	525	0	525	0	525	0
7.7921	0	525	0	525	0	525	0	525	0	530	0	525	0	530	0	525	0	525	0	525	0	525	0	530	0	530	0	525	0	525	0	520	0	525	0	525	0	525	0	535	0	525	0	525	0	525	0	525	0
7.8021	0	525	0	525	0	525	0	525	0	530	0	525	0	530	0	525	0	525	0	525	0	525	0	530	0	530	0	525	0	525	0	520	0	525	0	525	0	525	0	535	0	525	0	525	0	525	0	525	0
7.8121	0	525	0	525	0	525	0	525	0	530	0	525	0	530	0	525	0	525	0	525	0	525	0	530	0	530	0	525	0	525	0	520	0	525	0	525	0	525	0	535	0	525	0	525	0	525	0	525	0
7.8221	0	525	0	525	0	525	0	525	0	530	0	525	0	530	0	525	0	525	0	525	0	525	0	530	0	530	0	525	0	525	0	520	0	525	0	525	0	525	0	535	0	525	0	525	0	525	0	525	0
7.8322	0	525	0	525	0	525	0	525	0	530	0	525	0	530	0	525	0	525	0	525	0	525	0	530	0	530	0	525	0	525	0	520	0	525	0	525	0	525	0	535	0	525	0	525	0	525	0	525	0
7.8422	0	525	0	525	0	525	0	525	0	530	0	525	0	530	0	525	0	525	0	525	0	525	0	530	0	530	0	525	0	525	0	520	0	525	0	525	0	525	0	535	0	525	0	525	0	525	0	525	0
7.8522	0	525	0	525	0	525	0	525	0	530	0	525	0	530	0	525	0	525	0	525	0	525	0	530	0	530	0	525	0	525	0	520	0	525	0	525	0	525	0	535	0	525	0	525	0	525	0	525	0
7.8622	0	525	0	525	0	525	0	525	0	530	0	525	0	530	0	525	0	525	0	525	0	525	0	530	0	530	0	525	0	525	0	520	0	525	0	525	0	525	0	535	0	525	0	525	0	525	0	525	0
7.8722	0	525	0	525	0	525	0	525	0	530	0	525	0	530	0	525	0	525	0	525	0	525	0	530	0	530	0	525	0	525	0	520	0	525	0	525	0	525	0	535	0	525	0	525	0	525	0	525	0
7.8822	0	525	0	525	0	525	0	525	0	530	0	525	0	530	0	525	0	525	0	525	0	525	0	530	0	530	0	525	0	525	0	520	0	525	0	525	0	525	0	535	0	525	0	525	0	525	0	525	0
7.8923	0	525	0	525	0	525	0	525	0	530	0	525	0	530	0	525	0	525	0	525	0	525	0	530	0	530	0	525	0	525	0	520	0	525	0	525	0	525	0	535	0	525	0	525	0	525	0	525	0
7.9023	0	525	0	525	0	525	0	525	0	530	0	525	0	530	0	525	0	525	0	525	0	525	0	530	0	530	0	525	0	525	0	520	0	525	0	525	0	525	0	535	0	525	0	525	0	525	0	525	0
7.9123	0	525	0	525	0	525	0	525	0	530	0	525	0	530	0	525	0	525	0	525	0	525	0	530	0	530	0	525	0	525	0	520	0	525	0	525	0	525	0	535	0	525	0	525	0	525	0	525	0
7.9223	0	525	0	525	0	525	0	525	0	530	0	525	0	530	0	525	0	525	0	525	0	525	0	530	0	530	0	525	0	525	0	520	0	525	0	525	0	525	0	535	0	525	0	525	0	525	0	525	0
7.9323	0	525	0	525	0	525	0	525	0	530	0	525	0	530	0	525	0	525	0	525	0	525	0	530	0	530	0	525	0	525	0	520	0	525	0	525	0	525	0	535	0	525	0	525	0	525	0	525	0
7.9423	0	525	0	525	0	525	0	525	0	530	0	525	0	530	0	525	0	525	0	525	0	525	0	530	0	530	0	525	0	525	0	520	0	525	0	525	0	525	0	535	0	525	0	525	0	525	0	525	0
7.9523	0	525	0	525	0	525	0	525	0	530	0	525	0	530	0	525	0	525	0	525	0	525	0	530	0	530	0	525	0	525	0	520	0	525	0	525	0	525	0	535	0	525	0	525	0	525	0	525	0
7.9624	0	525	0	525	0	525	0	525	0	530	0	525	0	530	0	525	0	525	0	525	0	525	0	530	0	530	0	525	0	525	0	520	0	525	0	525	0	525	0	535	0	525	0	525	0	525	0	525	0
7.9724	0	525	0	525	0	525	0	525	0	530	0	525	0	530	0	525	0	525	0	525	0	525	0	530	0	530	0	525	0	525	0	520	0	525	0	525	0	525	0	535	0	525	0	525	0	525	0	525	0
7.9824	0	525	0	525	0	525	0	525	0	530	0	525	0	530	0	525	0	525	0	525	0	525	0	530	0	530	0	525	0	525	0	520	0	525	0	525	0	525	0	535	0	525	0	525	0	525	0	525	0
7.9924	0	525	0	525	0	525	0	525	0	530	0	525	0	530	0	525	0	525	0	525	0	525	0	530	0	530	0	525	0	525	0	520	0	525	0	525	0	525	0	535	0	525	0	525	0	525	0	525	0
8.0024	0	525	0	525	0	525	0	525	0	530	0	525	0	530	0	525	0	525	0	525	0	525	0	530	0	530	0	525	0	525	0	520	0	525	0	525	0	525	0	535	0	525	0	525	0	525	0	525	0
8.0124	0	525	0	525	0	525	0	525	0	530	0	525	0	530	0	525	0	525	0	525	0	525	0	530	0	530	0	525	0	525	0	520	0	525	0	525	0	525	0	535	0	525	0	525	0	525	0	525	0
8.0225	0	525	0	525	0	525	0	525	0	530	0	525	0	530	0	525	0	525	0	525	0	525	0	530	0	530	0	525	0	525	0	520	0	525	0	525	0	525	0	535	0	525	0	525	0	525	0	525	0
8.0325	0	525	0	525	0	525	0	525	0	530	0	525	0	530	0	525	0	525	0	525	0	525	0	530	0	530	0	525	0	525	0	520	0	525	0	525	0	525	0	535	0	525	0	525	0	525	0	525	0
8.0425	0	525	0	525	0	525	0	525	0	530	0	525	0	530	0	525	0	525	0	525	0	525	0	530	0	530	0	525	0	525	0	520	0	525	0	525	0	525	0	535	0	525	0	525	0	525	0	525	0
8.0525	0	525	0	525	0	525	0	525	0	530	0	525	0	530	0	525	0	525	0	525	0	525	0	530	0	530	0	525	0	525	0	520	0	525	0	525	0	525	0	535	0	525	0	525	0	525	0	525	0
8.0625	0	525	0	525	0	525	0	525	0	530	0	525	0	530	0	525	0	525	0	525	0	525	0	530	0	530	0	525	0	525	0	520	0	525	0	525	0	525	0	535	0	525	0	525	0	525	0	525	0
8.0725	0	525	0	525	0	525	0	525	0	530	0	525	0	530	0	525	0	525	0	525	0	525	0	530	0	530	0	525	0	525	0	520	0	525	0	525	0	525	0	535	0	525	0	525	0	525	0	525	0
8.0825	0	525	0	525	0	525	0	525	0	530	0	525	0	530	0	525	0	525	0	525	0	525	0	530	0	530	0	525	0	525	0	520	0	525	0	525	0	525	0	535	0	525	0	525	0	525	0	525	0
8.0926	0	525	0	525	0	525	0	525	0	530	0	525	0	530	0	525	0	525	0	525	0	525	0	530	0	530	0	525	0	525	0	520	0	525	0	525	0	525	0	535	0	525	0	525	0	525	0	525	0
8.1026	0	525	0	525	0	525	0	525	0	530	0	525	0	530	0	525	0	525	0	525	0	525	0	530	0	530	0	525	0	525	0	520	0	525	0	525	0	525	0	535	0	525	0	525	0	525	0	525	0
8.1126	0	525	0	525	0	525	0	525	0	530	0	525	0	530	0	525	0	525	0	525	0	525	0	530	0	530	0	525	0	525	0	520	0	525	0	525	0	525	0	535	0	525	0	525	0	525	0	525	0
8.1226	0	525	0	525	0	525	0	525	0	530	0	525	0	530	0	525	0	525	0	525	0	525	0	530	0	530	0	525	0	525	0	520	0	525	0	525	0	525	0	535	0	525	0	525	0	525	0	525	0
8.1326	0	525	0	525	0	525	0	525	0	530	0	525	0	530	0	525	0	525	0	525	0	525	0	530	0	530	0	525	0	525	0	520	0	525	0	525	0	525	0	535	0	525	0	525	0	525	0	525	0
8.1426	0	525	0	525	0	525	0	525	0	530	0	525	0	530	0	525	0	525	0	525	0	525	0	530	0	530	0	525	0	525	0	520	0	525	0	525	0	525	0	535	0	525	0	525	0	525	0	525	0
8.1527	0	525	0	525	0	525	0	525	0	530	0	525	0	530	0	525	0	525	0	525	0	525	0	530	0	530	0	525	0	525	0	520	0	525	0	525	0	525	0	535	0	525	0	525	0	525	0	525	0
8.1627	0	525	0	525	0	525	0	525	0	530	0	525	0	530	0	525	0	525	0	525	0	525	0	530	0	530	0	525	0	525	0	520	0	525	0	525	0	525	0	535	0	525	0	525	0	525	0	525	0
8.1727	0	525	0	525	0	525	0	525	0	530	0	525	0	530	0	525	0	525	0	525	0	525	0	530	0	530	0	525	0	525	0	520	0	525	0	525	0	525	0	535	0	525	0	525	0	525	0	525	0
8.1827	0	525	0	525	0	525	0	525	0	530	0	525	0	530	0	525	0	525	0	525	0	525	0	530	0	530	0	525	0	525	0	520	0	525	0	525	0	525	0	535	0	525	0	525	0	525	0	525	0
8.1927	0	525	0	525	0	525	0	525	0	530	0	525	0	530	0	525	0	525	0	525	0	525	0	530	0	530	0	525	0	525	0	520	0	525	0	525	0	525	0	535	0	525	0	525	0	525	0	525	0
8.2027	0	525	0	525	0	525	0	525	0	530	0	525	0	530	0	525	0	525	0	525	0	525	0	530	0	530	0	525	0	525	0	520	0	525	0	525	0	525	0	535	0	525	0	525	0	525	0	525	0
8.2127	0	525	0	525	0	525	0	525	0	530	0	525	0	530	0	525	0	525	0	525	0	525	0	530	0	530	0	525	0	525	0	520	0	525	0	525	0	525	0	535	0	525	0	525	0	525	0	525	0
8.2228	0	525	0	525	0	525	0	525	0	530	0	525	0	530	0	525	0	525	0	525	0	525	0	530	0	530	0	525	0	525	0	520	0	525	0	525	0	525	0	535	0	525	0	525	0	525	0	525	0
8.2328	0	525	0	525	0	525	0	525	0	530	0	525	0	530	0	525	0	525	0	525	0	525	0	530	0	530	0	525	0	525	0	520	0	525	0	525	0	525	0	535	0	525	0	525	0	525	0	525	0
8.2428	0	525	0	525	0	525	0	525	0	530	0	525	0	530	0	525	0	525	0	525	0	525	0	530	0	530	0	525	0	525	0	520	0	525	0	525	0	525	0	535	0	525	0	525	0	525	0	525	0
8.2528	0	525	0	525	0	525	0	525	0	530	0	525	0	530	0	525	0	525	0	525	0	525	0	530	0	530	0	525	0	525	0	520	0	525	0	525	0	525	0	535	0	525	0	525	0	525	0	525	0
8.2628	0	525	0	525	0	525	0	525	0	530	0	525	0	530	0	525	0	525	0	525	0	525	0	530	0	530	0	525	0	525	0	520	0	525	0	525	0	525	0	535	0	525	0	525	0	525	0	525	0
8.2728	0	525	0	525	0	525	0	525	0	530	0	525	0	530	0	525	0	525	0	525	0	525	0	530	0	530	0	525	0	525	0	520	0	525	0	525	0	525	0	535	0	525	0	525	0	525	0	525	0
8.2829	0	525	0	525	0	525	0	525	0	530	0	525	0	530	0	525	0	525	0	525	0	525	0	530	0	530	0	525	0	525	0	520	0	525	0	525	0	525	0	535	0	525	0	525	0	525	0	525	0
8.2929	0	525	0	525	0	525	0	525	0	530	0	525	0	530	0	525	0	525	0	525	0	525	0	530	0	530	0	525	0	525	0	520	0	525	0	525	0	525	0	535	0	525	0	525	0	525	0	525	0
8.3029	0	525	0	525	0	525	0	525	0	530	0	525	0	530	0	525	0	525	0	525	0	525	0	530	0	530	0	525	0	525	0	520	0	525	0	525	0	525	0	535	0	525	0	525	0	525	0	525	0
8.3129	0	525	0	525	0	525	0	525	0	530	0	525	0	530	0	525	0	525	0	525	0	525	0	530	0	530	0	525	0	525	0	520	0	525	0	525	0	525	0	535	0	525	0	525	0	525	0	525	0
8.3229	0	525	0	525	0	525	0	525	0	530	0	525	0	530	0	525	0	525	0	525	0	525	0	530	0	530	0	525	0	525	0	520	0	525	0	525	0	525	0	535	0	525	0	525	0	525	0	525	0
8.3329	0	525	0	525	0	525	0	525	0	530	0	525	0	530	0	525	0	525	0	525	0	525	0	530	0	530	0	525	0	525	0	520	0	525	0	525	0	525	0	535	0	525	0	525	0	525	0	525	0
8.343	0	525	0	525	0	525	0	525	0	530	0	525	0	530	0	525	0	525	0	525	0	525	0	530	0	530	0	525	0	525	0	520	0	525	0	525	0	525	0	535	0	525	0	525	0	525	0	525	0
8.353	0	525	0	525	0	525	0	525	0	530	0	525	0	530	0	525	0	525	0	525	0	525	0	530	0	530	0	525	0	525	0	520	0	525	0	525	0	525	0	535	0	525	0	525	0	525	0	525	0
8.363	0	525	0	525	0	525	0	525	0	530	0	525	0	530	0	525	0	525	0	525	0	525	0	530	0	530	0	525	0	525	0	520	0	525	0	525	0	525	0	535	0	525	0	525	0	525	0	525	0
8.373	0	525	0	525	0	525	0	525	0	530	0	525	0	530	0	525	0	525	0	525	0	525	0	530	0	530	0	525	0	525	0	520	0	525	0	525	0	525	0	535	0	525	0	525	0	525	0	525	0
8.383	0	525	0	525	0	525	0	525	0	530	0	525	0	530	0	525	0	525	0	525	0	525	0	530	0	530	0	525	0	525	0	520	0	525	0	525	0	525	0	535	0	525	0	525	0	525	0	525	0
8.393	0	525	0	525	0	525	0	525	0	530	0	525	0	530	0	525	0	525	0	525	0	525	0	530	0	530	0	525	0	525	0	520	0	525	0	525	0	525	0	535	0	525	0	525	0	525	0	525	0
8.403	0	525	0	525	0	525	0	525	0	530	0	525	0	530	0	525	0	525	0	525	0	525	0	530	0	530	0	525	0	525	0	520	0	525	0	525	0	525	0	535	0	525	0	525	0	525	0	525	0
8.4131	0	525	0	525	0	525	0	525	0	530	0	525	0	530	0	525	0	525	0	525	0	525	0	530	0	530	0	525	0	525	0	520	0	525	0	525	0	525	0	535	0	525	0	525	0	525	0	525	0
8.4231	0	525	0	525	0	525	0	525	0	530	0	525	0	530	0	525	0	525	0	525	0	525	0	530	0	530	0	525	0	525	0	520	0	525	0	525	0	525	0	535	0	525	0	525	0	525	0	525	0
8.4331	0	525	0	525	0	525	0	525	0	530	0	525	0	530	0	525	0	525	0	525	0	525	0	530	0	530	0	525	0	525	0	520	0	525	0	525	0	525	0	535	0	525	0	525	0	525	0	525	0
8.4431	0	525	0	525	0	525	0	525	0	530	0	525	0	530	0	525	0	525	0	525	0	525	0	530	0	530	0	525	0	525	0	520	0	525	0	525	0	525	0	535	0	525	0	525	0	525	0	525	0
8.4531	0	525	0	525	0	525	0	525	0	530	0	525	0	530	0	525	0	525	0	525	0	525	0	530	0	530	0	525	0	525	0	520	0	525	0	525	0	525	0	535	0	525	0	525	0	525	0	525	0
8.4631	0	525	0	525	0	525	0	525	0	530	0	525	0	530	0	525	0	525	0	525	0	525	0	530	0	530	0	525	0	525	0	520	0	525	0	525	0	525	0	535	0	525	0	525	0	525	0	525	0
8.4732	0	525	0	525	0	525	0	525	0	530	0	525	0	530	0	525	0	525	0	525	0	525	0	530	0	530	0	525	0	525	0	520	0	525	0	525	0	525	0	535	0	525	0	525	0	525	0	525	0
8.4832	0	525	0	525	0	525	0	525	0	530	0	525	0	530	0	525	0	525	0	525	0	525	0	530	0	530	0	525	0	525	0	520	0	525	0	525	0	525	0	535	0	525	0	525	0	525	0	525	0
8.4932	0	525	0	525	0	525	0	525	0	530	0	525	0	530	0	525	0	525	0	525	0	525	0	530	0	530	0	525	0	525	0	520	0	525	0	525	0	525	0	535	0	525	0	525	0	525	0	525	0
8.5032	0	525	0	525	0	525	0	525	0	530	0	525	0	530	0	525	0	525	0	525	0	525	0	530	0	530	0	525	0	525	0	520	0	525	0	525	0	525	0	535	0	525	0	525	0	525	0	525	0
8.5132	0	525	0	525	0	525	0	525	0	530	0	525	0	530	0	525	0	525	0	525	0	525	0	530	0	530	0	525	0	525	0	520	0	525	0	525	0	525	0	535	0	525	0	525	0	525	0	525	0
8.5232	0	525	0	525	0	525	0	525	0	530	0	525	0	530	0	525	0	525	0	525	0	525	0	530	0	530	0	525	0	525	0	520	0	525	0	525	0	525	0	535	0	525	0	525	0	525	0	525	0
8.5332	0	525	0	525	0	525	0	525	0	530	0	525	0	530	0	525	0	525	0	525	0	525	0	530	0	530	0	525	0	525	0	520	0	525	0	525	0	525	0	535	0	525	0	525	0	525	0	525	0
8.5433	0	525	0	525	0	525	0	525	0	530	0	525	0	530	0	525	0	525	0	525	0	525	0	530	0	530	0	525	0	525	0	520	0	525	0	525	0	525	0	535	0	525	0	525	0	525	0	525	0
8.5533	0	525	0	525	0	525	0	525	0	530	0	525	0	530	0	525	0	525	0	525	0	525	0	530	0	530	0	525	0	525	0	520	0	525	0	525	0	525	0	535	0	525	0	525	0	525	0	525	0
8.5633	0	525	0	525	0	525	0	525	0	530	0	525	0	530	0	525	0	525	0	525	0	525	0	530	0	530	0	525	0	525	0	520	0	525	0	525	0	525	0	535	0	525	0	525	0	525	0	525	0
8.5733	0	525	0	525	0	525	0	525	0	530	0	525	0	530	0	525	0	525	0	525	0	525	0	530	0	530	0	525	0	525	0	520	0	525	0	525	0	525	0	535	0	525	0	525	0	525	0	525	0
8.5833	0	525	0	525	0	525	0	525	0	530	0	525	0	530	0	525	0	525	0	525	0	525	0	530	0	530	0	525	0	525	0	520	0	525	0	525	0	525	0	535	0	525	0	525	0	525	0	525	0
8.5933	0	525	0	525	0	525	0	525	0	530	0	525	0	530	0	525	0	525	0	525	0	525	0	530	0	530	0	525	0	525	0	520	0	525	0	525	0	525	0	535	0	525	0	525	0	525	0	525	0
8.6034	0	525	0	525	0	525	0	525	0	530	0	525	0	530	0	525	0	525	0	525	0	525	0	530	0	530	0	525	0	525	0	520	0	525	0	525	0	525	0	535	0	525	0	525	0	525	0	525	0
8.6134	0	525	0	525	0	525	0	525	0	530	0	525	0	530	0	525	0	525	0	525	0	525	0	530	0	530	0	525	0	525	0	520	0	525	0	525	0	525	0	535	0	525	0	525	0	525	0	525	0
8.6234	0	525	0	525	0	525	0	525	0	530	0	525	0	530	0	525	0	525	0	525	0	525	0	530	0	530	0	525	0	525	0	520	0	525	0	525	0	525	0	535	0	525	0	525	0	525	0	525	0
8.6334	0	525	0	525	0	525	0	525	0	530	0	525	0	530	0	525	0	525	0	525	0	525	0	530	0	530	0	525	0	525	0	520	0	525	0	525	0	525	0	535	0	525	0	525	0	525	0	525	0
8.6434	0	525	0	525	0	525	0	525	0	530	0	525	0	530	0	525	0	525	0	525	0	525	0	530	0	530	0	525	0	525	0	520	0	525	0	525	0	525	0	535	0	525	0	525	0	525	0	525	0
8.6534	0	525	0	525	0	525	0	525	0	530	0	525	0	530	0	525	0	525	0	525	0	525	0	530	0	530	0	525	0	525	0	520	0	525	0	525	0	525	0	535	0	525	0	525	0	525	0	525	0
8.6634	0	525	0	525	0	525	0	525	0	530	0	525	0	530	0	525	0	525	0	525	0	525	0	530	0	530	0	525	0	525	0	520	0	525	0	525	0	525	0	535	0	525	0	525	0	525	0	525	0
8.6735	0	525	0	525	0	525	0	525	0	530	0	525	0	530	0	525	0	525	0	525	0	525	0	530	0	530	0	525	0	525	0	520	0	525	0	525	0	525	0	535	0	525	0	525	0	525	0	525	0
8.6835	0	525	0	525	0	525	0	525	0	530	0	525	0	530	0	525	0	525	0	525	0	525	0	530	0	530	0	525	0	525	0	520	0	525	0	525	0	525	0	535	0	525	0	525	0	525	0	525	0
8.6935	0	525	0	525	0	525	0	525	0	530	0	525	0	530	0	525	0	525	0	525	0	525	0	530	0	530	0	525	0	525	0	520	0	525	0	525	0	525	0	535	0	525	0	525	0	525	0	525	0
8.7035	0	525	0	525	0	525	0	525	0	530	0	525	0	530	0	525	0	525	0	525	0	525	0	530	0	530	0	525	0	525	0	520	0	525	0	525	0	525	0	535	0	525	0	525	0	525	0	525	0
8.7135	0	525	0	525	0	525	0	525	0	530	0	525	0	530	0	525	0	525	0	525	0	525	0	530	0	530	0	525	0	525	0	520	0	525	0	525	0	525	0	535	0	525	0	525	0	525	0	525	0
8.7235	0	525	0	525	0	525	0	525	0	530	0	525	0	530	0	525	0	525	0	525	0	525	0	530	0	530	0	525	0	525	0	520	0	525	0	525	0	525	0	535	0	525	0	525	0	525	0	525	0
8.7336	0	525	0	525	0	525	0	525	0	530	0	525	0	530	0	525	0	525	0	525	0	525	0	530	0	530	0	525	0	525	0	520	0	525	0	525	0	525	0	535	0	525	0	525	0	525	0	525	0
8.7436	0	525	0	525	0	525	0	525	0	530	0	525	0	530	0	525	0	525	0	525	0	525	0	530	0	530	0	525	0	525	0	520	0	525	0	525	0	525	0	535	0	525	0	525	0	525	0	525	0
8.7536	0	525	0	525	0	525	0	525	0	530	0	525	0	530	0	525	0	525	0	525	0	525	0	530	0	530	0	525	0	525	0	520	0	525	0	525	0	525	0	535	0	525	0	525	0	525	0	525	0
8.7636	0	525	0	525	0	525	0	525	0	530	0	525	0	530	0	525	0	525	0	525	0	525	0	530	0	530	0	525	0	525	0	520	0	525	0	525	0	525	0	535	0	525	0	525	0	525	0	525	0
8.7736	0	525	0	525	0	525	0	525	0	530	0	525	0	530	0	525	0	525	0	525	0	525	0	530	0	530	0	525	0	525	0	520	0	525	0	525	0	525	0	535	0	525	0	525	0	525	0	525	0
8.7836	0	525	0	525	0	525	0	525	0	530	0	525	0	530	0	525	0	525	0	525	0	525	0	530	0	530	0	525	0	525	0	520	0	525	0	525	0	525	0	535	0	525	0	525	0	525	0	525	0
8.7937	0	525	0	525	0	525	0	525	0	530	0	525	0	530	0	525	0	525	0	525	0	525	0	530	0	530	0	525	0	525	0	520	0	525	0	525	0	525	0	535	0	525	0	525	0	525	0	525	0
8.8037	0	525	0	525	0	525	0	525	0	530	0	525	0	530	0	525	0	525	0	525	0	525	0	530	0	530	0	525	0	525	0	520	0	525	0	525	0	525	0	535	0	525	0	525	0	525	0	525	0
8.8137	0	525	0	525	0	525	0	525	0	530	0	525	0	530	0	525	0	525	0	525	0	525	0	530	0	530	0	525	0	525	0	520	0	525	0	525	0	525	0	535	0	525	0	525	0	525	0	525	0
8.8237	0	525	0	525	0	525	0	525	0	530	0	525	0	530	0	525	0	525	0	525	0	525	0	530	0	530	0	525	0	525	0	520	0	525	0	525	0	525	0	535	0	525	0	525	0	525	0	525	0
8.8337	0	525	0	525	0	525	0	525	0	530	0	525	0	530	0	525	0	525	0	525	0	525	0	530	0	530	0	525	0	525	0	520	0	525	0	525	0	525	0	535	0	525	0	525	0	525	0	525	0
8.8437	0	525	0	525	0	525	0	525	0	530	0	525	0	530	0	525	0	525	0	525	0	525	0	530	0	530	0	525	0	525	0	520	0	525	0	525	0	525	0	535	0	525	0	525	0	525	0	525	0
8.8537	0	525	0	525	0	525	0	525	0	530	0	525	0	530	0	525	0	525	0	525	0	525	0	530	0	530	0	525	0	525	0	520	0	525	0	525	0	525	0	535	0	525	0	525	0	525	0	525	0
8.8638	0	525	0	525	0	525	0	525	0	530	0	525	0	530	0	525	0	525	0	525	0	525	0	530	0	530	0	525	0	525	0	520	0	525	0	525	0	525	0	535	0	525	0	525	0	525	0	525	0
8.8738	0	525	0	525	0	525	0	525	0	530	0	525	0	530	0	525	0	525	0	525	0	525	0	530	0	530	0	525	0	525	0	520	0	525	0	525	0	525	0	535	0	525	0	525	0	525	0	525	0
8.8838	0	525	0	525	0	525	0	525	0	530	0	525	0	530	0	525	0	525	0	525	0	525	0	530	0	530	0	525	0	525	0	520	0	525	0	525	0	525	0	535	0	525	0	525	0	525	0	525	0
8.8938	0	525	0	525	0	525	0	525	0	530	0	525	0	530	0	525	0	525	0	525	0	525	0	530	0	530	0	525	0	525	0	520	0	525	0	525	0	525	0	535	0	525	0	525	0	525	0	525	0
8.9038	0	525	0	525	0	525	0	525	0	530	0	525	0	530	0	525	0	525	0	525	0	525	0	530	0	530	0	525	0	525	0	520	0	525	0	525	0	525	0	535	0	525	0	525	0	525	0	525	0
8.9138	0	525	0	525	0	525	0	525	0	530	0	525	0	530	0	525	0	525	0	525	0	525	0	530	0	530	0	525	0	525	0	520	0	525	0	525	0	525	0	535	0	525	0	525	0	525	0	525	0
8.9239	0	525	0	525	0	525	0	525	0	530	0	525	0	530	0	525	0	525	0	525	0	525	0	530	0	530	0	525	0	525	0	520	0	525	0	525	0	525	0	535	0	525	0	525	0	525	0	525	0
8.9339	0	525	0	525	0	525	0	525	0	530	0	525	0	530	0	525	0	525	0	525	0	525	0	530	0	530	0	525	0	525	0	520	0	525	0	525	0	525	0	535	0	525	0	525	0	525	0	525	0
8.9439	0	525	0	525	0	525	0	525	0	530	0	525	0	530	0	525	0	525	0	525	0	525	0	530	0	530	0	525	0	525	0	520	0	525	0	525	0	525	0	535	0	525	0	525	0	525	0	525	0
8.9539	0	525	0	525	0	525	0	525	0	530	0	525	0	530	0	525	0	525	0	525	0	525	0	530	0	530	0	525	0	525	0	520	0	525	0	525	0	525	0	535	0	525	0	525	0	525	0	525	0
8.9639	0	525	0	525	0	525	0	525	0	530	0	525	0	530	0	525	0	525	0	525	0	525	0	530	0	530	0	525	0	525	0	520	0	525	0	525	0	525	0	535	0	525	0	525	0	525	0	525	0
8.9739	0	525	0	525	0	525	0	525	0	530	0	525	0	530	0	525	0	525	0	525	0	525	0	530	0	530	0	525	0	525	0	520	0	525	0	525	0	525	0	535	0	525	0	525	0	525	0	525	0
8.9839	0	525	0	525	0	525	0	525	0	530	0	525	0	530	0	525	0	525	0	525	0	525	0	530	0	530	0	525	0	525	0	520	0	525	0	525	0	525	0	535	0	525	0	525	0	525	0	525	0
8.994	0	525	0	525	0	525	0	525	0	530	0	525	0	530	0	525	0	525	0	525	0	525	0	530	0	530	0	525	0	525	0	520	0	525	0	525	0	525	0	535	0	525	0	525	0	525	0	525	0
9.004	0	525	0	525	0	525	0	525	0	530	0	525	0	530	0	525	0	525	0	525	0	525	0	530	0	530	0	525	0	525	0	520	0	525	0	525	0	525	0	535	0	525	0	525	0	525	0	525	0
9.014	0	525	0	525	0	525	0	525	0	530	0	525	0	530	0	525	0	525	0	525	0	525	0	530	0	530	0	525	0	525	0	520	0	525	0	525	0	525	0	535	0	525	0	525	0	525	0	525	0
9.024	0	525	0	525	0	525	0	525	0	530	0	525	0	530	0	525	0	525	0	525	0	525	0	530	0	530	0	525	0	525	0	520	0	525	0	525	0	525	0	535	0	525	0	525	0	525	0	525	0
9.034	0	525	0	525	0	525	0	525	0	530	0	525	0	530	0	525	0	525	0	525	0	525	0	530	0	530	0	525	0	525	0	520	0	525	0	525	0	525	0	535	0	525	0	525	0	525	0	525	0
9.044	0	525	0	525	0	525	0	525	0	530	0	525	0	530	0	525	0	525	0	525	0	525	0	530	0	530	0	525	0	525	0	520	0	525	0	525	0	525	0	535	0	525	0	525	0	525	0	525	0
9.0541	0	525	0	525	0	525	0	525	0	530	0	525	0	530	0	525	0	525	0	525	0	525	0	530	0	530	0	525	0	525	0	520	0	525	0	525	0	525	0	535	0	525	0	525	0	525	0	525	0
9.0641	0	525	0	525	0	525	0	525	0	530	0	525	0	530	0	525	0	525	0	525	0	525	0	530	0	530	0	525	0	525	0	520	0	525	0	525	0	525	0	535	0	525	0	525	0	525	0	525	0
9.0741	0	525	0	525	0	525	0	525	0	530	0	525	0	530	0	525	0	525	0	525	0	525	0	530	0	530	0	525	0	525	0	520	0	525	0	525	0	525	0	535	0	525	0	525	0	525	0	525	0
9.0841	0	525	0	525	0	525	0	525	0	530	0	525	0	530	0	525	0	525	0	525	0	525	0	530	0	530	0	525	0	525	0	520	0	525	0	525	0	525	0	535	0	525	0	525	0	525	0	525	0
9.0941	0	525	0	525	0	525	0	525	0	530	0	525	0	530	0	525	0	525	0	525	0	525	0	530	0	530	0	525	0	525	0	520	0	525	0	525	0	525	0	535	0	525	0	525	0	525	0	525	0
9.1041	0	525	0	525	0	525	0	525	0	530	0	525	0	530	0	525	0	525	0	525	0	525	0	530	0	530	0	525	0	525	0	520	0	525	0	525	0	525	0	535	0	525	0	525	0	525	0	525	0
9.1141	0	525	0	525	0	525	0	525	0	530	0	525	0	530	0	525	0	525	0	525	0	525	0	530	0	530	0	525	0	525	0	520	0	525	0	525	0	525	0	535	0	525	0	525	0	525	0	525	0
9.1242	0	525	0	525	0	525	0	525	0	530	0	525	0	530	0	525	0	525	0	525	0	525	0	530	0	530	0	525	0	525	0	520	0	525	0	525	0	525	0	535	0	525	0	525	0	525	0	525	0
9.1342	0	525	0	525	0	525	0	525	0	530	0	525	0	530	0	525	0	525	0	525	0	525	0	530	0	530	0	525	0	525	0	520	0	525	0	525	0	525	0	535	0	525	0	525	0	525	0	525	0
9.1442	0	525	0	525	0	525	0	525	0	530	0	525	0	530	0	525	0	525	0	525	0	525	0	530	0	530	0	525	0	525	0	520	0	525	0	525	0	525	0	535	0	525	0	525	0	525	0	525	0
9.1542	0	525	0	525	0	525	0	525	0	530	0	525	0	530	0	525	0	525	0	525	0	525	0	530	0	530	0	525	0	525	0	520	0	525	0	525	0	525	0	535	0	525	0	525	0	525	0	525	0
9.1642	0	525	0	525	0	525	0	525	0	530	0	525	0	530	0	525	0	525	0	525	0	525	0	530	0	530	0	525	0	525	0	520	0	525	0	525	0	525	0	535	0	525	0	525	0	525	0	525	0
9.1742	0	525	0	525	0	525	0	525	0	530	0	525	0	530	0	525	0	525	0	525	0	525	0	530	0	530	0	525	0	525	0	520	0	525	0	525	0	525	0	535	0	525	0	525	0	525	0	525	0
9.1843	0	525	0	525	0	525	0	525	0	530	0	525	0	530	0	525	0	525	0	525	0	525	0	530	0	530	0	525	0	525	0	520	0	525	0	525	0	525	0	535	0	525	0	525	0	525	0	525	0
9.1943	0	525	0	525	0	525	0	525	0	530	0	525	0	530	0	525	0	525	0	525	0	525	0	530	0	530	0	525	0	525	0	520	0	525	0	525	0	525	0	535	0	525	0	525	0	525	0	525	0
9.2043	0	525	0	525	0	525	0	525	0	530	0	525	0	530	0	525	0	525	0	525	0	525	0	530	0	530	0	525	0	525	0	520	0	525	0	525	0	525	0	535	0	525	0	525	0	525	0	525	0
9.2143	0	525	0	525	0	525	0	525	0	530	0	525	0	530	0	525	0	525	0	525	0	525	0	530	0	530	0	525	0	525	0	520	0	525	0	525	0	525	0	535	0	525	0	525	0	525	0	525	0
9.2243	0	525	0	525	0	525	0	525	0	530	0	525	0	530	0	525	0	525	0	525	0	525	0	530	0	530	0	525	0	525	0	520	0	525	0	525	0	525	0	535	0	525	0	525	0	525	0	525	0
9.2343	0	525	0	525	0	525	0	525	0	530	0	525	0	530	0	525	0	525	0	525	0	525	0	530	0	530	0	525	0	525	0	520	0	525	0	525	0	525	0	535	0	525	0	525	0	525	0	525	0
9.2444	0	525	0	525	0	525	0	525	0	530	0	525	0	530	0	525	0	525	0	525	0	525	0	530	0	530	0	525	0	525	0	520	0	525	0	525	0	525	0	535	0	525	0	525	0	525	0	525	0
9.2544	0	525	0	525	0	525	0	525	0	530	0	525	0	530	0	525	0	525	0	525	0	525	0	530	0	530	0	525	0	525	0	520	0	525	0	525	0	525	0	535	0	525	0	525	0	525	0	525	0
9.2644	0	525	0	525	0	525	0	525	0	530	0	525	0	530	0	525	0	525	0	525	0	525	0	530	0	530	0	525	0	525	0	520	0	525	0	525	0	525	0	535	0	525	0	525	0	525	0	525	0
9.2744	0	525	0	525	0	525	0	525	0	530	0	525	0	530	0	525	0	525	0	525	0	525	0	530	0	530	0	525	0	525	0	520	0	525	0	525	0	525	0	535	0	525	0	525	0	525	0	525	0
9.2844	0	525	0	525	0	525	0	525	0	530	0	525	0	530	0	525	0	525	0	525	0	525	0	530	0	530	0	525	0	525	0	520	0	525	0	525	0	525	0	535	0	525	0	525	0	525	0	525	0
9.2944	0	525	0	525	0	525	0	525	0	530	0	525	0	530	0	525	0	525	0	525	0	525	0	530	0	530	0	525	0	525	0	520	0	525	0	525	0	525	0	535	0	525	0	525	0	525	0	525	0
9.3044	0	525	0	525	0	525	0	525	0	530	0	525	0	530	0	525	0	525	0	525	0	525	0	530	0	530	0	525	0	525	0	520	0	525	0	525	0	525	0	535	0	525	0	525	0	525	0	525	0
9.3145	0	525	0	525	0	525	0	525	0	530	0	525	0	530	0	525	0	525	0	525	0	525	0	530	0	530	0	525	0	525	0	520	0	525	0	525	0	525	0	535	0	525	0	525	0	525	0	525	0
9.3245	0	525	0	525	0	525	0	525	0	530	0	525	0	530	0	525	0	525	0	525	0	525	0	530	0	530	0	525	0	525	0	520	0	525	0	525	0	525	0	535	0	525	0	525	0	525	0	525	0
9.3345	0	525	0	525	0	525	0	525	0	530	0	525	0	530	0	525	0	525	0	525	0	525	0	530	0	530	0	525	0	525	0	520	0	525	0	525	0	525	0	535	0	525	0	525	0	525	0	525	0
9.3445	0	525	0	525	0	525	0	525	0	530	0	525	0	530	0	525	0	525	0	525	0	525	0	530	0	530	0	525	0	525	0	520	0	525	0	525	0	525	0	535	0	525	0	525	0	525	0	525	0
9.3545	0	525	0	525	0	525	0	525	0	530	0	525	0	530	0	525	0	525	0	525	0	525	0	530	0	530	0	525	0	525	0	520	0	525	0	525	0	525	0	535	0	525	0	525	0	525	0	525	0
9.3645	0	525	0	525	0	525	0	525	0	530	0	525	0	530	0	525	0	525	0	525	0	525	0	530	0	530	0	525	0	525	0	520	0	525	0	525	0	525	0	535	0	525	0	525	0	525	0	525	0
9.3746	0	525	0	525	0	525	0	525	0	530	0	525	0	530	0	525	0	525	0	525	0	525	0	530	0	530	0	525	0	525	0	520	0	525	0	525	0	525	0	535	0	525	0	525	0	525	0	525	0
9.3846	0	525	0	525	0	525	0	525	0	530	0	525	0	530	0	525	0	525	0	525	0	525	0	530	0	530	0	525	0	525	0	520	0	525	0	525	0	525	0	535	0	525	0	525	0	525	0	525	0
9.3946	0	525	0	525	0	525	0	525	0	530	0	525	0	530	0	525	0	525	0	525	0	525	0	530	0	530	0	525	0	525	0	520	0	525	0	525	0	525	0	535	0	525	0	525	0	525	0	525	0
9.4046	0	525	0	525	0	525	0	525	0	530	0	525	0	530	0	525	0	525	0	525	0	525	0	530	0	530	0	525	0	525	0	520	0	525	0	525	0	525	0	535	0	525	0	525	0	525	0	525	0
9.4146	0	525	0	525	0	525	0	525	0	530	0	525	0	530	0	525	0	525	0	525	0	525	0	530	0	530	0	525	0	525	0	520	0	525	0	525	0	525	0	535	0	525	0	525	0	525	0	525	0
9.4246	0	525	0	525	0	525	0	525	0	530	0	525	0	530	0	525	0	525	0	525	0	525	0	530	0	530	0	525	0	525	0	520	0	525	0	525	0	525	0	535	0	525	0	525	0	525	0	525	0
9.4346	0	525	0	525	0	525	0	525	0	530	0	525	0	530	0	525	0	525	0	525	0	525	0	530	0	530	0	525	0	525	0	520	0	525	0	525	0	525	0	535	0	525	0	525	0	525	0	525	0
9.4447	0	525	0	525	0	525	0	525	0	530	0	525	0	530	0	525	0	525	0	525	0	525	0	530	0	530	0	525	0	525	0	520	0	525	0	525	0	525	0	535	0	525	0	525	0	525	0	525	0
9.4547	0	525	0	525	0	525	0	525	0	530	0	525	0	530	0	525	0	525	0	525	0	525	0	530	0	530	0	525	0	525	0	520	0	525	0	525	0	525	0	535	0	525	0	525	0	525	0	525	0
9.4647	0	525	0	525	0	525	0	525	0	530	0	525	0	530	0	525	0	525	0	525	0	525	0	530	0	530	0	525	0	525	0	520	0	525	0	525	0	525	0	535	0	525	0	525	0	525	0	525	0
9.4747	0	525	0	525	0	525	0	525	0	530	0	525	0	530	0	525	0	525	0	525	0	525	0	530	0	530	0	525	0	525	0	520	0	525	0	525	0	525	0	535	0	525	0	525	0	525	0	525	0
9.4847	0	525	0	525	0	525	0	525	0	530	0	525	0	530	0	525	0	525	0	525	0	525	0	530	0	530	0	525	0	525	0	520	0	525	0	525	0	525	0	535	0	525	0	525	0	525	0	525	0
9.4947	0	525	0	525	0	525	0	525	0	530	0	525	0	530	0	525	0	525	0	525	0	525	0	530	0	530	0	525	0	525	0	520	0	525	0	525	0	525	0	535	0	525	0	525	0	525	0	525	0
9.5048	0	525	0	525	0	525	0	525	0	530	0	525	0	530	0	525	0	525	0	525	0	525	0	530	0	530	0	525	0	525	0	520	0	525	0	525	0	525	0	535	0	525	0	525	0	525	0	525	0
9.5148	0	525	0	525	0	525	0	525	0	530	0	525	0	530	0	525	0	525	0	525	0	525	0	530	0	530	0	525	0	525	0	520	0	525	0	525	0	525	0	535	0	525	0	525	0	525	0	525	0
9.5248	0	525	0	525	0	525	0	525	0	530	0	525	0	530	0	525	0	525	0	525	0	525	0	530	0	530	0	525	0	525	0	520	0	525	0	525	0	525	0	535	0	525	0	525	0	525	0	525	0
9.5348	0	525	0	525	0	525	0	525	0	530	0	525	0	530	0	525	0	525	0	525	0	525	0	530	0	530	0	525	0	525	0	520	0	525	0	525	0	525	0	535	0	525	0	525	0	525	0	525	0
9.5448	0	525	0	525	0	525	0	525	0	530	0	525	0	530	0	525	0	525	0	525	0	525	0	530	0	530	0	525	0	525	0	520	0	525	0	525	0	525	0	535	0	525	0	525	0	525	0	525	0
9.5548	0	525	0	525	0	525	0	525	0	530	0	525	0	530	0	525	0	525	0	525	0	525	0	530	0	530	0	525	0	525	0	520	0	525	0	525	0	525	0	535	0	525	0	525	0	525	0	525	0
9.5648	0	525	0	525	0	525	0	525	0	530	0	525	0	530	0	525	0	525	0	525	0	525	0	530	0	530	0	525	0	525	0	520	0	525	0	525	0	525	0	535	0	525	0	525	0	525	0	525	0
9.5749	0	525	0	525	0	525	0	525	0	530	0	525	0	530	0	525	0	525	0	525	0	525	0	530	0	530	0	525	0	525	0	520	0	525	0	525	0	525	0	535	0	525	0	525	0	525	0	525	0
9.5849	0	525	0	525	0	525	0	525	0	530	0	525	0	530	0	525	0	525	0	525	0	525	0	530	0	530	0	525	0	525	0	520	0	525	0	525	0	525	0	535	0	525	0	525	0	525	0	525	0
9.5949	0	525	0	525	0	525	0	525	0	530	0	525	0	530	0	525	0	525	0	525	0	525	0	530	0	530	0	525	0	525	0	520	0	525	0	525	0	525	0	535	0	525	0	525	0	525	0	525	0
9.6049	0	525	0	525	0	525	0	525	0	530	0	525	0	530	0	525	0	525	0	525	0	525	0	530	0	530	0	525	0	525	0	520	0	525	0	525	0	525	0	535	0	525	0	525	0	525	0	525	0
9.6149	0	525	0	525	0	525	0	525	0	530	0	525	0	530	0	525	0	525	0	525	0	525	0	530	0	530	0	525	0	525	0	520	0	525	0	525	0	525	0	535	0	525	0	525	0	525	0	525	0
9.6249	0	525	0	525	0	525	0	525	0	530	0	525	0	530	0	525	0	525	0	525	0	525	0	530	0	530	0	525	0	525	0	520	0	525	0	525	0	525	0	535	0	525	0	525	0	525	0	525	0
9.635	0	525	0	525	0	525	0	525	0	530	0	525	0	530	0	525	0	525	0	525	0	525	0	530	0	530	0	525	0	525	0	520	0	525	0	525	0	525	0	535	0	525	0	525	0	525	0	525	0
9.645	0	525	0	525	0	525	0	525	0	530	0	525	0	530	0	525	0	525	0	525	0	525	0	530	0	530	0	525	0	525	0	520	0	525	0	525	0	525	0	535	0	525	0	525	0	525	0	525	0
9.655	0	525	0	525	0	525	0	525	0	530	0	525	0	530	0	525	0	525	0	525	0	525	0	530	0	530	0	525	0	525	0	520	0	525	0	525	0	525	0	535	0	525	0	525	0	525	0	525	0
9.665	0	525	0	525	0	525	0	525	0	530	0	525	0	530	0	525	0	525	0	525	0	525	0	530	0	530	0	525	0	525	0	520	0	525	0	525	0	525	0	535	0	525	0	525	0	525	0	525	0
9.675	0	525	0	525	0	525	0	525	0	530	0	525	0	530	0	525	0	525	0	525	0	525	0	530	0	530	0	525	0	525	0	520	0	525	0	525	0	525	0	535	0	525	0	525	0	525	0	525	0
9.685	0	525	0	525	0	525	0	525	0	530	0	525	0	530	0	525	0	525	0	525	0	525	0	530	0	530	0	525	0	525	0	520	0	525	0	525	0	525	0	535	0	525	0	525	0	525	0	525	0
9.6951	0	525	0	525	0	525	0	525	0	530	0	525	0	530	0	525	0	525	0	525	0	525	0	530	0	530	0	525	0	525	0	520	0	525	0	525	0	525	0	535	0	525	0	525	0	525	0	525	0
9.7051	0	525	0	525	0	525	0	525	0	530	0	525	0	530	0	525	0	525	0	525	0	525	0	530	0	530	0	525	0	525	0	520	0	525	0	525	0	525	0	535	0	525	0	525	0	525	0	525	0
9.7151	0	525	0	525	0	525	0	525	0	530	0	525	0	530	0	525	0	525	0	525	0	525	0	530	0	530	0	525	0	525	0	520	0	525	0	525	0	525	0	535	0	525	0	525	0	525	0	525	0
9.7251	0	525	0	525	0	525	0	525	0	530	0	525	0	530	0	525	0	525	0	525	0	525	0	530	0	530	0	525	0	525	0	520	0	525	0	525	0	525	0	535	0	525	0	525	0	525	0	525	0
9.7351	0	525	0	525	0	525	0	525	0	530	0	525	0	530	0	525	0	525	0	525	0	525	0	530	0	530	0	525	0	525	0	520	0	525	0	525	0	525	0	535	0	525	0	525	0	525	0	525	0
9.7451	0	525	0	525	0	525	0	525	0	530	0	525	0	530	0	525	0	525	0	525	0	525	0	530	0	530	0	525	0	525	0	520	0	525	0	525	0	525	0	535	0	525	0	525	0	525	0	525	0
9.7551	0	525	0	525	0	525	0	525	0	530	0	525	0	530	0	525	0	525	0	525	0	525	0	530	0	530	0	525	0	525	0	520	0	525	0	525	0	525	0	535	0	525	0	525	0	525	0	525	0
9.7652	0	525	0	525	0	525	0	525	0	530	0	525	0	530	0	525	0	525	0	525	0	525	0	530	0	530	0	525	0	525	0	520	0	525	0	525	0	525	0	535	0	525	0	525	0	525	0	525	0
9.7752	0	525	0	525	0	525	0	525	0	530	0	525	0	530	0	525	0	525	0	525	0	525	0	530	0	530	0	525	0	525	0	520	0	525	0	525	0	525	0	535	0	525	0	525	0	525	0	525	0
9.7852	0	525	0	525	0	525	0	525	0	530	0	525	0	530	0	525	0	525	0	525	0	525	0	530	0	530	0	525	0	525	0	520	0	525	0	525	0	525	0	535	0	525	0	525	0	525	0	525	0
9.7952	0	525	0	525	0	525	0	525	0	530	0	525	0	530	0	525	0	525	0	525	0	525	0	530	0	530	0	525	0	525	0	520	0	525	0	525	0	525	0	535	0	525	0	525	0	525	0	525	0
9.8052	0	525	0	525	0	525	0	525	0	530	0	525	0	530	0	525	0	525	0	525	0	525	0	530	0	530	0	525	0	525	0	520	0	525	0	525	0	525	0	535	0	525	0	525	0	525	0	525	0
9.8152	0	525	0	525	0	525	0	525	0	530	0	525	0	530	0	525	0	525	0	525	0	525	0	530	0	530	0	525	0	525	0	520	0	525	0	525	0	525	0	535	0	525	0	525	0	525	0	525	0
9.8253	0	525	0	525	0	525	0	525	0	530	0	525	0	530	0	525	0	525	0	525	0	525	0	530	0	530	0	525	0	525	0	520	0	525	0	525	0	525	0	535	0	525	0	525	0	525	0	525	0
9.8353	0	525	0	525	0	525	0	525	0	530	0	525	0	530	0	525	0	525	0	525	0	525	0	530	0	530	0	525	0	525	0	520	0	525	0	525	0	525	0	535	0	525	0	525	0	525	0	525	0
9.8453	0	525	0	525	0	525	0	525	0	530	0	525	0	530	0	525	0	525	0	525	0	525	0	530	0	530	0	525	0	525	0	520	0	525	0	525	0	525	0	535	0	525	0	525	0	525	0	525	0
9.8553	0	525	0	525	0	525	0	525	0	530	0	525	0	530	0	525	0	525	0	525	0	525	0	530	0	530	0	525	0	525	0	520	0	525	0	525	0	525	0	535	0	525	0	525	0	525	0	525	0
9.8653	0	525	0	525	0	525	0	525	0	530	0	525	0	530	0	525	0	525	0	525	0	525	0	530	0	530	0	525	0	525	0	520	0	525	0	525	0	525	0	535	0	525	0	525	0	525	0	525	0
9.8753	0	525	0	525	0	525	0	525	0	530	0	525	0	530	0	525	0	525	0	525	0	525	0	530	0	530	0	525	0	525	0	520	0	525	0	525	0	525	0	535	0	525	0	525	0	525	0	525	0
9.8853	0	525	0	525	0	525	0	525	0	530	0	525	0	530	0	525	0	525	0	525	0	525	0	530	0	530	0	525	0	525	0	520	0	525	0	525	0	525	0	535	0	525	0	525	0	525	0	525	0
9.8954	0	525	0	525	0	525	0	525	0	530	0	525	0	530	0	525	0	525	0	525	0	525	0	530	0	530	0	525	0	525	0	520	0	525	0	525	0	525	0	535	0	525	0	525	0	525	0	525	0
9.9054	0	525	0	525	0	525	0	525	0	530	0	525	0	530	0	525	0	525	0	525	0	525	0	530	0	530	0	525	0	525	0	520	0	525	0	525	0	525	0	535	0	525	0	525	0	525	0	525	0
9.9154	0	525	0	525	0	525	0	525	0	530	0	525	0	530	0	525	0	525	0	525	0	525	0	530	0	530	0	525	0	525	0	520	0	525	0	525	0	525	0	535	0	525	0	525	0	525	0	525	0
9.9254	0	525	0	525	0	525	0	525	0	530	0	525	0	530	0	525	0	525	0	525	0	525	0	530	0	530	0	525	0	525	0	520	0	525	0	525	0	525	0	535	0	525	0	525	0	525	0	525	0
9.9354	0	525	0	525	0	525	0	525	0	530	0	525	0	530	0	525	0	525	0	525	0	525	0	530	0	530	0	525	0	525	0	520	0	525	0	525	0	525	0	535	0	525	0	525	0	525	0	525	0
9.9454	0	525	0	525	0	525	0	525	0	530	0	525	0	530	0	525	0	525	0	525	0	525	0	530	0	530	0	525	0	525	0	520	0	525	0	525	0	525	0	535	0	525	0	525	0	525	0	525	0
9.9555	0	525	0	525	0	525	0	525	0	530	0	525	0	530	0	525	0	525	0	525	0	525	0	530	0	530	0	525	0	525	0	520	0	525	0	525	0	525	0	535	0	525	0	525	0	525	0	525	0
9.9655	0	525	0	525	0	525	0	525	0	530	0	525	0	530	0	525	0	525	0	525	0	525	0	530	0	530	0	525	0	525	0	520	0	525	0	525	0	525	0	535	0	525	0	525	0	525	0	525	0
9.9755	0	525	0	525	0	525	0	525	0	530	0	525	0	530	0	525	0	525	0	525	0	525	0	530	0	530	0	525	0	525	0	520	0	525	0	525	0	525	0	535	0	525	0	525	0	525	0	525	0
9.9855	0	525	0	525	0	525	0	525	0	530	0	525	0	530	0	525	0	525	0	525	0	525	0	530	0	530	0	525	0	525	0	520	0	525	0	525	0	525	0	535	0	525	0	525	0	525	0	525	0
9.9955	0	525	0	525	0	525	0	525	0	530	0	525	0	530	0	525	0	525	0	525	0	525	0	530	0	530	0	525	0	525	0	520	0	525	0	525	0	525	0	535	0	525	0	525	0	525	0	525	0
10.0055	0	525	0	525	0	525	0	525	0	530	0	525	0	530	0	525	0	525	0	525	0	525	0	530	0	530	0	525	0	525	0	520	0	525	0	525	0	525	0	535	0	525	0	525	0	525	0	525	0
10.0155	0	525	0	525	0	525	0	525	0	530	0	525	0	530	0	525	0	525	0	525	0	525	0	530	0	530	0	525	0	525	0	520	0	525	0	525	0	525	0	535	0	525	0	525	0	525	0	525	0
10.0256	0	525	0	525	0	525	0	525	0	530	0	525	0	530	0	525	0	525	0	525	0	525	0	530	0	530	0	525	0	525	0	520	0	525	0	525	0	525	0	535	0	525	0	525	0	525	0	525	0
10.0356	0	525	0	525	0	525	0	525	0	530	0	525	0	530	0	525	0	525	0	525	0	525	0	530	0	530	0	525	0	525	0	520	0	525	0	525	0	525	0	535	0	525	0	525	0	525	0	525	0
10.0456	0	525	0	525	0	525	0	525	0	530	0	525	0	530	0	525	0	525	0	525	0	525	0	530	0	530	0	525	0	525	0	520	0	525	0	525	0	525	0	535	0	525	0	525	0	525	0	525	0
10.0556	0	525	0	525	0	525	0	525	0	530	0	525	0	530	0	525	0	525	0	525	0	525	0	530	0	530	0	525	0	525	0	520	0	525	0	525	0	525	0	535	0	525	0	525	0	525	0	525	0
10.0656	0	525	0	525	0	525	0	525	0	530	0	525	0	530	0	525	0	525	0	525	0	525	0	530	0	530	0	525	0	525	0	520	0	525	0	525	0	525	0	535	0	525	0	525	0	525	0	525	0
10.0756	0	525	0	525	0	525	0	525	0	530	0	525	0	530	0	525	0	525	0	525	0	525	0	530	0	530	0	525	0	525	0	520	0	525	0	525	0	525	0	535	0	525	0	525	0	525	0	525	0
10.0857	0	525	0	525	0	525	0	525	0	530	0	525	0	530	0	525	0	525	0	525	0	525	0	530	0	530	0	525	0	525	0	520	0	525	0	525	0	525	0	535	0	525	0	525	0	525	0	525	0
10.0957	0	525	0	525	0	525	0	525	0	530	0	525	0	530	0	525	0	525	0	525	0	525	0	530	0	530	0	525	0	525	0	520	0	525	0	525	0	525	0	535	0	525	0	525	0	525	0	525	0
10.1057	0	525	0	525	0	525	0	525	0	530	0	525	0	530	0	525	0	525	0	525	0	525	0	530	0	530	0	525	0	525	0	520	0	525	0	525	0	525	0	535	0	525	0	525	0	525	0	525	0
10.1157	0	525	0	525	0	525	0	525	0	530	0	525	0	530	0	525	0	525	0	525	0	525	0	530	0	530	0	525	0	525	0	520	0	525	0	525	0	525	0	535	0	525	0	525	0	525	0	525	0
10.1257	0	525	0	525	0	525	0	525	0	530	0	525	0	530	0	525	0	525	0	525	0	525	0	530	0	530	0	525	0	525	0	520	0	525	0	525	0	525	0	535	0	525	0	525	0	525	0	525	0
10.1357	0	525	0	525	0	525	0	525	0	530	0	525	0	530	0	525	0	525	0	525	0	525	0	530	0	530	0	525	0	525	0	520	0	525	0	525	0	525	0	535	0	525	0	525	0	525	0	525	0
10.1457	0	525	0	525	0	525	0	525	0	530	0	525	0	530	0	525	0	525	0	525	0	525	0	530	0	530	0	525	0	525	0	520	0	525	0	525	0	525	0	535	0	525	0	525	0	525	0	525	0
10.1558	0	525	0	525	0	525	0	525	0	530	0	525	0	530	0	525	0	525	0	525	0	525	0	530	0	530	0	525	0	525	0	520	0	525	0	525	0	525	0	535	0	525	0	525	0	525	0	525	0
10.1658	0	525	0	525	0	525	0	525	0	530	0	525	0	530	0	525	0	525	0	525	0	525	0	530	0	530	0	525	0	525	0	520	0	525	0	525	0	525	0	535	0	525	0	525	0	525	0	525	0
10.1758	0	525	0	525	0	525	0	525	0	530	0	525	0	530	0	525	0	525	0	525	0	525	0	530	0	530	0	525	0	525	0	520	0	525	0	525	0	525	0	535	0	525	0	525	0	525	0	525	0
10.1858	0	525	0	525	0	525	0	525	0	530	0	525	0	530	0	525	0	525	0	525	0	525	0	530	0	530	0	525	0	525	0	520	0	525	0	525	0	525	0	535	0	525	0	525	0	525	0	525	0
10.1958	0	525	0	525	0	525	0	525	0	530	0	525	0	530	0	525	0	525	0	525	0	525	0	530	0	530	0	525	0	525	0	520	0	525	0	525	0	525	0	535	0	525	0	525	0	525	0	525	0
10.2058	0	525	0	525	0	525	0	525	0	530	0	525	0	530	0	525	0	525	0	525	0	525	0	530	0	530	0	525	0	525	0	520	0	525	0	525	0	525	0	535	0	525	0	525	0	525	0	525	0
10.2159	0	525	0	525	0	525	0	525	0	530	0	525	0	530	0	525	0	525	0	525	0	525	0	530	0	530	0	525	0	525	0	520	0	525	0	525	0	525	0	535	0	525	0	525	0	525	0	525	0
10.2259	0	525	0	525	0	525	0	525	0	530	0	525	0	530	0	525	0	525	0	525	0	525	0	530	0	530	0	525	0	525	0	520	0	525	0	525	0	525	0	535	0	525	0	525	0	525	0	525	0
10.2359	0	525	0	525	0	525	0	525	0	530	0	525	0	530	0	525	0	525	0	525	0	525	0	530	0	530	0	525	0	525	0	520	0	525	0	525	0	525	0	535	0	525	0	525	0	525	0	525	0
10.2459	0	525	0	525	0	525	0	525	0	530	0	525	0	530	0	525	0	525	0	525	0	525	0	530	0	530	0	525	0	525	0	520	0	525	0	525	0	525	0	535	0	525	0	525	0	525	0	525	0
10.2559	0	525	0	525	0	525	0	525	0	530	0	525	0	530	0	525	0	525	0	525	0	525	0	530	0	530	0	525	0	525	0	520	0	525	0	525	0	525	0	535	0	525	0	525	0	525	0	525	0
10.2659	0	525	0	525	0	525	0	525	0	530	0	525	0	530	0	525	0	525	0	525	0	525	0	530	0	530	0	525	0	525	0	520	0	525	0	525	0	525	0	535	0	525	0	525	0	525	0	525	0
10.276	0	525	0	525	0	525	0	525	0	530	0	525	0	530	0	525	0	525	0	525	0	525	0	530	0	530	0	525	0	525	0	520	0	525	0	525	0	525	0	535	0	525	0	525	0	525	0	525	0
10.286	0	525	0	525	0	525	0	525	0	530	0	525	0	530	0	525	0	525	0	525	0	525	0	530	0	530	0	525	0	525	0	520	0	525	0	525	0	525	0	535	0	525	0	525	0	525	0	525	0
10.296	0	525	0	525	0	525	0	525	0	530	0	525	0	530	0	525	0	525	0	525	0	525	0	530	0	530	0	525	0	525	0	520	0	525	0	525	0	525	0	535	0	525	0	525	0	525	0	525	0
10.306	0	525	0	525	0	525	0	525	0	530	0	525	0	530	0	525	0	525	0	525	0	525	0	530	0	530	0	525	0	525	0	520	0	525	0	525	0	525	0	535	0	525	0	525	0	525	0	525	0
10.316	0	525	0	525	0	525	0	525	0	530	0	525	0	530	0	525	0	525	0	525	0	525	0	530	0	530	0	525	0	525	0	520	0	525	0	525	0	525	0	535	0	525	0	525	0	525	0	525	0
10.326	0	525	0	525	0	525	0	525	0	530	0	525	0	530	0	525	0	525	0	525	0	525	0	530	0	530	0	525	0	525	0	520	0	525	0	525	0	525	0	535	0	525	0	525	0	525	0	525	0
10.336	0	525	0	525	0	525	0	525	0	530	0	525	0	530	0	525	0	525	0	525	0	525	0	530	0	530	0	525	0	525	0	520	0	525	0	525	0	525	0	535	0	525	0	525	0	525	0	525	0
10.3461	0	525	0	525	0	525	0	525	0	530	0	525	0	530	0	525	0	525	0	525	0	525	0	530	0	530	0	525	0	525	0	520	0	525	0	525	0	525	0	535	0	525	0	525	0	525	0	525	0
10.3561	0	525	0	525	0	525	0	525	0	530	0	525	0	530	0	525	0	525	0	525	0	525	0	530	0	530	0	525	0	525	0	520	0	525	0	525	0	525	0	535	0	525	0	525	0	525	0	525	0
10.3661	0	525	0	525	0	525	0	525	0	530	0	525	0	530	0	525	0	525	0	525	0	525	0	530	0	530	0	525	0	525	0	520	0	525	0	525	0	525	0	535	0	525	0	525	0	525	0	525	0
10.3761	0	525	0	525	0	525	0	525	0	530	0	525	0	530	0	525	0	525	0	525	0	525	0	530	0	530	0	525	0	525	0	520	0	525	0	525	0	525	0	535	0	525	0	525	0	525	0	525	0
10.3861	0	525	0	525	0	525	0	525	0	530	0	525	0	530	0	525	0	525	0	525	0	525	0	530	0	530	0	525	0	525	0	520	0	525	0	525	0	525	0	535	0	525	0	525	0	525	0	525	0
10.3961	0	525	0	525	0	525	0	525	0	530	0	525	0	530	0	525	0	525	0	525	0	525	0	530	0	530	0	525	0	525	0	520	0	525	0	525	0	525	0	535	0	525	0	525	0	525	0	525	0
10.4062	0	525	0	525	0	525	0	525	0	530	0	525	0	530	0	525	0	525	0	525	0	525	0	530	0	530	0	525	0	525	0	520	0	525	0	525	0	525	0	535	0	525	0	525	0	525	0	525	0
10.4162	0	525	0	525	0	525	0	525	0	530	0	525	0	530	0	525	0	525	0	525	0	525	0	530	0	530	0	525	0	525	0	520	0	525	0	525	0	525	0	535	0	525	0	525	0	525	0	525	0
10.4262	0	525	0	525	0	525	0	525	0	530	0	525	0	530	0	525	0	525	0	525	0	525	0	530	0	530	0	525	0	525	0	520	0	525	0	525	0	525	0	535	0	525	0	525	0	525	0	525	0
10.4362	0	525	0	525	0	525	0	525	0	530	0	525	0	530	0	525	0	525	0	525	0	525	0	530	0	530	0	525	0	525	0	520	0	525	0	525	0	525	0	535	0	525	0	525	0	525	0	525	0
10.4462	0	525	0	525	0	525	0	525	0	530	0	525	0	530	0	525	0	525	0	525	0	525	0	530	0	530	0	525	0	525	0	520	0	525	0	525	0	525	0	535	0	525	0	525	0	525	0	525	0
10.4562	0	525	0	525	0	525	0	525	0	530	0	525	0	530	0	525	0	525	0	525	0	525	0	530	0	530	0	525	0	525	0	520	0	525	0	525	0	525	0	535	0	525	0	525	0	525	0	525	0
10.4662	0	525	0	525	0	525	0	525	0	530	0	525	0	530	0	525	0	525	0	525	0	525	0	530	0	530	0	525	0	525	0	520	0	525	0	525	0	525	0	535	0	525	0	525	0	525	0	525	0
10.4763	0	525	0	525	0	525	0	525	0	530	0	525	0	530	0	525	0	525	0	525	0	525	0	530	0	530	0	525	0	525	0	520	0	525	0	525	0	525	0	535	0	525	0	525	0	525	0	525	0
10.4863	0	525	0	525	0	525	0	525	0	530	0	525	0	530	0	525	0	525	0	525	0	525	0	530	0	530	0	525	0	525	0	520	0	525	0	525	0	525	0	535	0	525	0	525	0	525	0	525	0
10.4963	0	525	0	525	0	525	0	525	0	530	0	525	0	530	0	525	0	525	0	525	0	525	0	530	0	530	0	525	0	525	0	520	0	525	0	525	0	525	0	535	0	525	0	525	0	525	0	525	0
10.5063	0	525	0	525	0	525	0	525	0	530	0	525	0	530	0	525	0	525	0	525	0	525	0	530	0	530	0	525	0	525	0	520	0	525	0	525	0	525	0	535	0	525	0	525	0	525	0	525	0
10.5163	0	525	0	525	0	525	0	525	0	530	0	525	0	530	0	525	0	525	0	525	0	525	0	530	0	530	0	525	0	525	0	520	0	525	0	525	0	525	0	535	0	525	0	525	0	525	0	525	0
10.5263	0	525	0	525	0	525	0	525	0	530	0	525	0	530	0	525	0	525	0	525	0	525	0	530	0	530	0	525	0	525	0	520	0	525	0	525	0	525	0	535	0	525	0	525	0	525	0	525	0
10.5364	0	525	0	525	0	525	0	525	0	530	0	525	0	530	0	525	0	525	0	525	0	525	0	530	0	530	0	525	0	525	0	520	0	525	0	525	0	525	0	535	0	525	0	525	0	525	0	525	0
10.5464	0	525	0	525	0	525	0	525	0	530	0	525	0	530	0	525	0	525	0	525	0	525	0	530	0	530	0	525	0	525	0	520	0	525	0	525	0	525	0	535	0	525	0	525	0	525	0	525	0
10.5564	0	525	0	525	0	525	0	525	0	530	0	525	0	530	0	525	0	525	0	525	0	525	0	530	0	530	0	525	0	525	0	520	0	525	0	525	0	525	0	535	0	525	0	525	0	525	0	525	0
10.5664	0	525	0	525	0	525	0	525	0	530	0	525	0	530	0	525	0	525	0	525	0	525	0	530	0	530	0	525	0	525	0	520	0	525	0	525	0	525	0	535	0	525	0	525	0	525	0	525	0
10.5764	0	525	0	525	0	525	0	525	0	530	0	525	0	530	0	525	0	525	0	525	0	525	0	530	0	530	0	525	0	525	0	520	0	525	0	525	0	525	0	535	0	525	0	525	0	525	0	525	0
10.5864	0	525	0	525	0	525	0	525	0	530	0	525	0	530	0	525	0	525	0	525	0	525	0	530	0	530	0	525	0	525	0	520	0	525	0	525	0	525	0	535	0	525	0	525	0	525	0	525	0
10.5964	0	525	0	525	0	525	0	525	0	530	0	525	0	530	0	525	0	525	0	525	0	525	0	530	0	530	0	525	0	525	0	520	0	525	0	525	0	525	0	535	0	525	0	525	0	525	0	525	0
10.6065	0	525	0	525	0	525	0	525	0	530	0	525	0	530	0	525	0	525	0	525	0	525	0	530	0	530	0	525	0	525	0	520	0	525	0	525	0	525	0	535	0	525	0	525	0	525	0	525	0
10.6165	0	525	0	525	0	525	0	525	0	530	0	525	0	530	0	525	0	525	0	525	0	525	0	530	0	530	0	525	0	525	0	520	0	525	0	525	0	525	0	535	0	525	0	525	0	525	0	525	0
10.6265	0	525	0	525	0	525	0	525	0	530	0	525	0	530	0	525	0	525	0	525	0	525	0	530	0	530	0	525	0	525	0	520	0	525	0	525	0	525	0	535	0	525	0	525	0	525	0	525	0
10.6365	0	525	0	525	0	525	0	525	0	530	0	525	0	530	0	525	0	525	0	525	0	525	0	530	0	530	0	525	0	525	0	520	0	525	0	525	0	525	0	535	0	525	0	525	0	525	0	525	0
10.6465	0	525	0	525	0	525	0	525	0	530	0	525	0	530	0	525	0	525	0	525	0	525	0	530	0	530	0	525	0	525	0	520	0	525	0	525	0	525	0	535	0	525	0	525	0	525	0	525	0
10.6565	0	525	0	525	0	525	0	525	0	530	0	525	0	530	0	525	0	525	0	525	0	525	0	530	0	530	0	525	0	525	0	520	0	525	0	525	0	525	0	535	0	525	0	525	0	525	0	525	0
10.6666	0	525	0	525	0	525	0	525	0	530	0	525	0	530	0	525	0	525	0	525	0	525	0	530	0	530	0	525	0	525	0	520	0	525	0	525	0	525	0	535	0	525	0	525	0	525	0	525	0
10.6766	0	525	0	525	0	525	0	525	0	530	0	525	0	530	0	525	0	525	0	525	0	525	0	530	0	530	0	525	0	525	0	520	0	525	0	525	0	525	0	535	0	525	0	525	0	525	0	525	0
10.6866	0	525	0	525	0	525	0	525	0	530	0	525	0	530	0	525	0	525	0	525	0	525	0	530	0	530	0	525	0	525	0	520	0	525	0	525	0	525	0	535	0	525	0	525	0	525	0	525	0
10.6966	0	525	0	525	0	525	0	525	0	530	0	525	0	530	0	525	0	525	0	525	0	525	0	530	0	530	0	525	0	525	0	520	0	525	0	525	0	525	0	535	0	525	0	525	0	525	0	525	0
10.7066	0	525	0	525	0	525	0	525	0	530	0	525	0	530	0	525	0	525	0	525	0	525	0	530	0	530	0	525	0	525	0	520	0	525	0	525	0	525	0	535	0	525	0	525	0	525	0	525	0
10.7166	0	525	0	525	0	525	0	525	0	530	0	525	0	530	0	525	0	525	0	525	0	525	0	530	0	530	0	525	0	525	0	520	0	525	0	525	0	525	0	535	0	525	0	525	0	525	0	525	0
10.7267	0	525	0	525	0	525	0	525	0	530	0	525	0	530	0	525	0	525	0	525	0	525	0	530	0	530	0	525	0	525	0	520	0	525	0	525	0	525	0	535	0	525	0	525	0	525	0	525	0
10.7367	0	525	0	525	0	525	0	525	0	530	0	525	0	530	0	525	0	525	0	525	0	525	0	530	0	530	0	525	0	525	0	520	0	525	0	525	0	525	0	535	0	525	0	525	0	525	0	525	0
10.7467	0	525	0	525	0	525	0	525	0	530	0	525	0	530	0	525	0	525	0	525	0	525	0	530	0	530	0	525	0	525	0	520	0	525	0	525	0	525	0	535	0	525	0	525	0	525	0	525	0
10.7567	0	525	0	525	0	525	0	525	0	530	0	525	0	530	0	525	0	525	0	525	0	525	0	530	0	530	0	525	0	525	0	520	0	525	0	525	0	525	0	535	0	525	0	525	0	525	0	525	0
10.7667	0	525	0	525	0	525	0	525	0	530	0	525	0	530	0	525	0	525	0	525	0	525	0	530	0	530	0	525	0	525	0	520	0	525	0	525	0	525	0	535	0	525	0	525	0	525	0	525	0
10.7767	0	525	0	525	0	525	0	525	0	530	0	525	0	530	0	525	0	525	0	525	0	525	0	530	0	530	0	525	0	525	0	520	0	525	0	525	0	525	0	535	0	525	0	525	0	525	0	525	0
10.7867	0	525	0	525	0	525	0	525	0	530	0	525	0	530	0	525	0	525	0	525	0	525	0	530	0	530	0	525	0	525	0	520	0	525	0	525	0	525	0	535	0	525	0	525	0	525	0	525	0
10.7968	0	525	0	525	0	525	0	525	0	530	0	525	0	530	0	525	0	525	0	525	0	525	0	530	0	530	0	525	0	525	0	520	0	525	0	525	0	525	0	535	0	525	0	525	0	525	0	525	0
10.8068	0	525	0	525	0	525	0	525	0	530	0	525	0	530	0	525	0	525	0	525	0	525	0	530	0	530	0	525	0	525	0	520	0	525	0	525	0	525	0	535	0	525	0	525	0	525	0	525	0
10.8168	0	525	0	525	0	525	0	525	0	530	0	525	0	530	0	525	0	525	0	525	0	525	0	530	0	530	0	525	0	525	0	520	0	525	0	525	0	525	0	535	0	525	0	525	0	525	0	525	0
10.8268	0	525	0	525	0	525	0	525	0	530	0	525	0	530	0	525	0	525	0	525	0	525	0	530	0	530	0	525	0	525	0	520	0	525	0	525	0	525	0	535	0	525	0	525	0	525	0	525	0
10.8368	0	525	0	525	0	525	0	525	0	530	0	525	0	530	0	525	0	525	0	525	0	525	0	530	0	530	0	525	0	525	0	520	0	525	0	525	0	525	0	535	0	525	0	525	0	525	0	525	0
10.8468	0	525	0	525	0	525	0	525	0	530	0	525	0	530	0	525	0	525	0	525	0	525	0	530	0	530	0	525	0	525	0	520	0	525	0	525	0	525	0	535	0	525	0	525	0	525	0	525	0
10.8569	0	525	0	525	0	525	0	525	0	530	0	525	0	530	0	525	0	525	0	525	0	525	0	530	0	530	0	525	0	525	0	520	0	525	0	525	0	525	0	535	0	525	0	525	0	525	0	525	0
10.8669	0	525	0	525	0	525	0	525	0	530	0	525	0	530	0	525	0	525	0	525	0	525	0	530	0	530	0	525	0	525	0	520	0	525	0	525	0	525	0	535	0	525	0	525	0	525	0	525	0
10.8769	0	525	0	525	0	525	0	525	0	530	0	525	0	530	0	525	0	525	0	525	0	525	0	530	0	530	0	525	0	525	0	520	0	525	0	525	0	525	0	535	0	525	0	525	0	525	0	525	0
10.8869	0	525	0	525	0	525	0	525	0	530	0	525	0	530	0	525	0	525	0	525	0	525	0	530	0	530	0	525	0	525	0	520	0	525	0	525	0	525	0	535	0	525	0	525	0	525	0	525	0
10.8969	0	525	0	525	0	525	0	525	0	530	0	525	0	530	0	525	0	525	0	525	0	525	0	530	0	530	0	525	0	525	0	520	0	525	0	525	0	525	0	535	0	525	0	525	0	525	0	525	0
10.9069	0	525	0	525	0	525	0	525	0	530	0	525	0	530	0	525	0	525	0	525	0	525	0	530	0	530	0	525	0	525	0	520	0	525	0	525	0	525	0	535	0	525	0	525	0	525	0	525	0
10.9169	0	525	0	525	0	525	0	525	0	530	0	525	0	530	0	525	0	525	0	525	0	525	0	530	0	530	0	525	0	525	0	520	0	525	0	525	0	525	0	535	0	525	0	525	0	525	0	525	0
10.927	0	525	0	525	0	525	0	525	0	530	0	525	0	530	0	525	0	525	0	525	0	525	0	530	0	530	0	525	0	525	0	520	0	525	0	525	0	525	0	535	0	525	0	525	0	525	0	525	0
10.937	0	525	0	525	0	525	0	525	0	530	0	525	0	530	0	525	0	525	0	525	0	525	0	530	0	530	0	525	0	525	0	520	0	525	0	525	0	525	0	535	0	525	0	525	0	525	0	525	0
10.947	0	525	0	525	0	525	0	525	0	530	0	525	0	530	0	525	0	525	0	525	0	525	0	530	0	530	0	525	0	525	0	520	0	525	0	525	0	525	0	535	0	525	0	525	0	525	0	525	0
10.957	0	525	0	525	0	525	0	525	0	530	0	525	0	530	0	525	0	525	0	525	0	525	0	530	0	530	0	525	0	525	0	520	0	525	0	525	0	525	0	535	0	525	0	525	0	525	0	525	0
10.967	0	525	0	525	0	525	0	525	0	530	0	525	0	530	0	525	0	525	0	525	0	525	0	530	0	530	0	525	0	525	0	520	0	525	0	525	0	525	0	535	0	525	0	525	0	525	0	525	0
10.977	0	525	0	525	0	525	0	525	0	530	0	525	0	530	0	525	0	525	0	525	0	525	0	530	0	530	0	525	0	525	0	520	0	525	0	525	0	525	0	535	0	525	0	525	0	525	0	525	0
10.9871	0	525	0	525	0	525	0	525	0	530	0	525	0	530	0	525	0	525	0	525	0	525	0	530	0	530	0	525	0	525	0	520	0	525	0	525	0	525	0	535	0	525	0	525	0	525	0	525	0
10.9971	0	525	0	525	0	525	0	525	0	530	0	525	0	530	0	525	0	525	0	525	0	525	0	530	0	530	0	525	0	525	0	520	0	525	0	525	0	525	0	535	0	525	0	525	0	525	0	525	0
11.0071	0	525	0	525	0	525	0	525	0	530	0	525	0	530	0	525	0	525	0	525	0	525	0	530	0	530	0	525	0	525	0	520	0	525	0	525	0	525	0	535	0	525	0	525	0	525	0	525	0
11.0171	0	525	0	525	0	525	0	525	0	530	0	525	0	530	0	525	0	525	0	525	0	525	0	530	0	530	0	525	0	525	0	520	0	525	0	525	0	525	0	535	0	525	0	525	0	525	0	525	0
11.0271	0	525	0	525	0	525	0	525	0	530	0	525	0	530	0	525	0	525	0	525	0	525	0	530	0	530	0	525	0	525	0	520	0	525	0	525	0	525	0	535	0	525	0	525	0	525	0	525	0
11.0371	0	525	0	525	0	525	0	525	0	530	0	525	0	530	0	525	0	525	0	525	0	525	0	530	0	530	0	525	0	525	0	520	0	525	0	525	0	525	0	535	0	525	0	525	0	525	0	525	0
11.0471	0	525	0	525	0	525	0	525	0	530	0	525	0	530	0	525	0	525	0	525	0	525	0	530	0	530	0	525	0	525	0	520	0	525	0	525	0	525	0	535	0	525	0	525	0	525	0	525	0
11.0572	0	525	0	525	0	525	0	525	0	530	0	525	0	530	0	525	0	525	0	525	0	525	0	530	0	530	0	525	0	525	0	520	0	525	0	525	0	525	0	535	0	525	0	525	0	525	0	525	0
11.0672	0	525	0	525	0	525	0	525	0	530	0	525	0	530	0	525	0	525	0	525	0	525	0	530	0	530	0	525	0	525	0	520	0	525	0	525	0	525	0	535	0	525	0	525	0	525	0	525	0
11.0772	0	525	0	525	0	525	0	525	0	530	0	525	0	530	0	525	0	525	0	525	0	525	0	530	0	530	0	525	0	525	0	520	0	525	0	525	0	525	0	535	0	525	0	525	0	525	0	525	0
11.0872	0	525	0	525	0	525	0	525	0	530	0	525	0	530	0	525	0	525	0	525	0	525	0	530	0	530	0	525	0	525	0	520	0	525	0	525	0	525	0	535	0	525	0	525	0	525	0	525	0
11.0972	0	525	0	525	0	525	0	525	0	530	0	525	0	530	0	525	0	525	0	525	0	525	0	530	0	530	0	525	0	525	0	520	0	525	0	525	0	525	0	535	0	525	0	525	0	525	0	525	0
11.1072	0	525	0	525	0	525	0	525	0	530	0	525	0	530	0	525	0	525	0	525	0	525	0	530	0	530	0	525	0	525	0	520	0	525	0	525	0	525	0	535	0	525	0	525	0	525	0	525	0
11.1173	0	525	0	525	0	525	0	525	0	530	0	525	0	530	0	525	0	525	0	525	0	525	0	530	0	530	0	525	0	525	0	520	0	525	0	525	0	525	0	535	0	525	0	525	0	525	0	525	0
11.1273	0	525	0	525	0	525	0	525	0	530	0	525	0	530	0	525	0	525	0	525	0	525	0	530	0	530	0	525	0	525	0	520	0	525	0	525	0	525	0	535	0	525	0	525	0	525	0	525	0
11.1373	0	525	0	525	0	525	0	525	0	530	0	525	0	530	0	525	0	525	0	525	0	525	0	530	0	530	0	525	0	525	0	520	0	525	0	525	0	525	0	535	0	525	0	525	0	525	0	525	0
11.1473	0	525	0	525	0	525	0	525	0	530	0	525	0	530	0	525	0	525	0	525	0	525	0	530	0	530	0	525	0	525	0	520	0	525	0	525	0	525	0	535	0	525	0	525	0	525	0	525	0
11.1573	0	525	0	525	0	525	0	525	0	530	0	525	0	530	0	525	0	525	0	525	0	525	0	530	0	530	0	525	0	525	0	520	0	525	0	525	0	525	0	535	0	525	0	525	0	525	0	525	0
11.1673	0	525	0	525	0	525	0	525	0	530	0	525	0	530	0	525	0	525	0	525	0	525	0	530	0	530	0	525	0	525	0	520	0	525	0	525	0	525	0	535	0	525	0	525	0	525	0	525	0
11.1774	0	525	0	525	0	525	0	525	0	530	0	525	0	530	0	525	0	525	0	525	0	525	0	530	0	530	0	525	0	525	0	520	0	525	0	525	0	525	0	535	0	525	0	525	0	525	0	525	0
11.1874	0	525	0	525	0	525	0	525	0	530	0	525	0	530	0	525	0	525	0	525	0	525	0	530	0	530	0	525	0	525	0	520	0	525	0	525	0	525	0	535	0	525	0	525	0	525	0	525	0
11.1974	0	525	0	525	0	525	0	525	0	530	0	525	0	530	0	525	0	525	0	525	0	525	0	530	0	530	0	525	0	525	0	520	0	525	0	525	0	525	0	535	0	525	0	525	0	525	0	525	0
11.2074	0	525	0	525	0	525	0	525	0	530	0	525	0	530	0	525	0	525	0	525	0	525	0	530	0	530	0	525	0	525	0	520	0	525	0	525	0	525	0	535	0	525	0	525	0	525	0	525	0
11.2174	0	525	0	525	0	525	0	525	0	530	0	525	0	530	0	525	0	525	0	525	0	525	0	530	0	530	0	525	0	525	0	520	0	525	0	525	0	525	0	535	0	525	0	525	0	525	0	525	0
11.2274	0	525	0	525	0	525	0	525	0	530	0	525	0	530	0	525	0	525	0	525	0	525	0	530	0	530	0	525	0	525	0	520	0	525	0	525	0	525	0	535	0	525	0	525	0	525	0	525	0
11.2374	0	525	0	525	0	525	0	525	0	530	0	525	0	530	0	525	0	525	0	525	0	525	0	530	0	530	0	525	0	525	0	520	0	525	0	525	0	525	0	535	0	525	0	525	0	525	0	525	0
11.2475	0	525	0	525	0	525	0	525	0	530	0	525	0	530	0	525	0	525	0	525	0	525	0	530	0	530	0	525	0	525	0	520	0	525	0	525	0	525	0	535	0	525	0	525	0	525	0	525	0
11.2575	0	525	0	525	0	525	0	525	0	530	0	525	0	530	0	525	0	525	0	525	0	525	0	530	0	530	0	525	0	525	0	520	0	525	0	525	0	525	0	535	0	525	0	525	0	525	0	525	0
11.2675	0	525	0	525	0	525	0	525	0	530	0	525	0	530	0	525	0	525	0	525	0	525	0	530	0	530	0	525	0	525	0	520	0	525	0	525	0	525	0	535	0	525	0	525	0	525	0	525	0
11.2775	0	525	0	525	0	525	0	525	0	530	0	525	0	530	0	525	0	525	0	525	0	525	0	530	0	530	0	525	0	525	0	520	0	525	0	525	0	525	0	535	0	525	0	525	0	525	0	525	0
11.2875	0	525	0	525	0	525	0	525	0	530	0	525	0	530	0	525	0	525	0	525	0	525	0	530	0	530	0	525	0	525	0	520	0	525	0	525	0	525	0	535	0	525	0	525	0	525	0	525	0
11.2975	0	525	0	525	0	525	0	525	0	530	0	525	0	530	0	525	0	525	0	525	0	525	0	530	0	530	0	525	0	525	0	520	0	525	0	525	0	525	0	535	0	525	0	525	0	525	0	525	0
11.3076	0	525	0	525	0	525	0	525	0	530	0	525	0	530	0	525	0	525	0	525	0	525	0	530	0	530	0	525	0	525	0	520	0	525	0	525	0	525	0	535	0	525	0	525	0	525	0	525	0
11.3176	0	525	0	525	0	525	0	525	0	530	0	525	0	530	0	525	0	525	0	525	0	525	0	530	0	530	0	525	0	525	0	520	0	525	0	525	0	525	0	535	0	525	0	525	0	525	0	525	0
11.3276	0	525	0	525	0	525	0	525	0	530	0	525	0	530	0	525	0	525	0	525	0	525	0	530	0	530	0	525	0	525	0	520	0	525	0	525	0	525	0	535	0	525	0	525	0	525	0	525	0
11.3376	0	525	0	525	0	525	0	525	0	530	0	525	0	530	0	525	0	525	0	525	0	525	0	530	0	530	0	525	0	525	0	520	0	525	0	525	0	525	0	535	0	525	0	525	0	525	0	525	0
11.3476	0	525	0	525	0	525	0	525	0	530	0	525	0	530	0	525	0	525	0	525	0	525	0	530	0	530	0	525	0	525	0	520	0	525	0	525	0	525	0	535	0	525	0	525	0	525	0	525	0
11.3576	0	525	0	525	0	525	0	525	0	530	0	525	0	530	0	525	0	525	0	525	0	525	0	530	0	530	0	525	0	525	0	520	0	525	0	525	0	525	0	535	0	525	0	525	0	525	0	525	0
11.3676	0	525	0	525	0	525	0	525	0	530	0	525	0	530	0	525	0	525	0	525	0	525	0	530	0	530	0	525	0	525	0	520	0	525	0	525	0	525	0	535	0	525	0	525	0	525	0	525	0
11.3777	0	525	0	525	0	525	0	525	0	530	0	525	0	530	0	525	0	525	0	525	0	525	0	530	0	530	0	525	0	525	0	520	0	525	0	525	0	525	0	535	0	525	0	525	0	525	0	525	0
11.3877	0	525	0	525	0	525	0	525	0	530	0	525	0	530	0	525	0	525	0	525	0	525	0	530	0	530	0	525	0	525	0	520	0	525	0	525	0	525	0	535	0	525	0	525	0	525	0	525	0
11.3977	0	525	0	525	0	525	0	525	0	530	0	525	0	530	0	525	0	525	0	525	0	525	0	530	0	530	0	525	0	525	0	520	0	525	0	525	0	525	0	535	0	525	0	525	0	525	0	525	0
11.4077	0	525	0	525	0	525	0	525	0	530	0	525	0	530	0	525	0	525	0	525	0	525	0	530	0	530	0	525	0	525	0	520	0	525	0	525	0	525	0	535	0	525	0	525	0	525	0	525	0
11.4177	0	525	0	525	0	525	0	525	0	530	0	525	0	530	0	525	0	525	0	525	0	525	0	530	0	530	0	525	0	525	0	520	0	525	0	525	0	525	0	535	0	525	0	525	0	525	0	525	0
11.4277	0	525	0	525	0	525	0	525	0	530	0	525	0	530	0	525	0	525	0	525	0	525	0	530	0	530	0	525	0	525	0	520	0	525	0	525	0	525	0	535	0	525	0	525	0	525	0	525	0
11.4378	0	525	0	525	0	525	0	525	0	530	0	525	0	530	0	525	0	525	0	525	0	525	0	530	0	530	0	525	0	525	0	520	0	525	0	525	0	525	0	535	0	525	0	525	0	525	0	525	0
11.4478	0	525	0	525	0	525	0	525	0	530	0	525	0	530	0	525	0	525	0	525	0	525	0	530	0	530	0	525	0	525	0	520	0	525	0	525	0	525	0	535	0	525	0	525	0	525	0	525	0
11.4578	0	525	0	525	0	525	0	525	0	530	0	525	0	530	0	525	0	525	0	525	0	525	0	530	0	530	0	525	0	525	0	520	0	525	0	525	0	525	0	535	0	525	0	525	0	525	0	525	0
11.4678	0	525	0	525	0	525	0	525	0	530	0	525	0	530	0	525	0	525	0	525	0	525	0	530	0	530	0	525	0	525	0	520	0	525	0	525	0	525	0	535	0	525	0	525	0	525	0	525	0
11.4778	0	525	0	525	0	525	0	525	0	530	0	525	0	530	0	525	0	525	0	525	0	525	0	530	0	530	0	525	0	525	0	520	0	525	0	525	0	525	0	535	0	525	0	525	0	525	0	525	0
11.4878	0	525	0	525	0	525	0	525	0	530	0	525	0	530	0	525	0	525	0	525	0	525	0	530	0	530	0	525	0	525	0	520	0	525	0	525	0	525	0	535	0	525	0	525	0	525	0	525	0
11.4978	0	525	0	525	0	525	0	525	0	530	0	525	0	530	0	525	0	525	0	525	0	525	0	530	0	530	0	525	0	525	0	520	0	525	0	525	0	525	0	535	0	525	0	525	0	525	0	525	0
11.5079	0	525	0	525	0	525	0	525	0	530	0	525	0	530	0	525	0	525	0	525	0	525	0	530	0	530	0	525	0	525	0	520	0	525	0	525	0	525	0	535	0	525	0	525	0	525	0	525	0
11.5179	0	525	0	525	0	525	0	525	0	530	0	525	0	530	0	525	0	525	0	525	0	525	0	530	0	530	0	525	0	525	0	520	0	525	0	525	0	525	0	535	0	525	0	525	0	525	0	525	0
11.5279	0	525	0	525	0	525	0	525	0	530	0	525	0	530	0	525	0	525	0	525	0	525	0	530	0	530	0	525	0	525	0	520	0	525	0	525	0	525	0	535	0	525	0	525	0	525	0	525	0
11.5379	0	525	0	525	0	525	0	525	0	530	0	525	0	530	0	525	0	525	0	525	0	525	0	530	0	530	0	525	0	525	0	520	0	525	0	525	0	525	0	535	0	525	0	525	0	525	0	525	0
11.5479	0	525	0	525	0	525	0	525	0	530	0	525	0	530	0	525	0	525	0	525	0	525	0	530	0	530	0	525	0	525	0	520	0	525	0	525	0	525	0	535	0	525	0	525	0	525	0	525	0
11.5579	0	525	0	525	0	525	0	525	0	530	0	525	0	530	0	525	0	525	0	525	0	525	0	530	0	530	0	525	0	525	0	520	0	525	0	525	0	525	0	535	0	525	0	525	0	525	0	525	0
11.568	0	525	0	525	0	525	0	525	0	530	0	525	0	530	0	525	0	525	0	525	0	525	0	530	0	530	0	525	0	525	0	520	0	525	0	525	0	525	0	535	0	525	0	525	0	525	0	525	0
11.578	0	525	0	525	0	525	0	525	0	530	0	525	0	530	0	525	0	525	0	525	0	525	0	530	0	530	0	525	0	525	0	520	0	525	0	525	0	525	0	535	0	525	0	525	0	525	0	525	0
11.588	0	525	0	525	0	525	0	525	0	530	0	525	0	530	0	525	0	525	0	525	0	525	0	530	0	530	0	525	0	525	0	520	0	525	0	525	0	525	0	535	0	525	0	525	0	525	0	525	0
11.598	0	525	0	525	0	525	0	525	0	530	0	525	0	530	0	525	0	525	0	525	0	525	0	530	0	530	0	525	0	525	0	520	0	525	0	525	0	525	0	535	0	525	0	525	0	525	0	525	0
11.608	0	525	0	525	0	525	0	525	0	530	0	525	0	530	0	525	0	525	0	525	0	525	0	530	0	530	0	525	0	525	0	520	0	525	0	525	0	525	0	535	0	525	0	525	0	525	0	525	0
11.618	0	525	0	525	0	525	0	525	0	530	0	525	0	530	0	525	0	525	0	525	0	525	0	530	0	530	0	525	0	525	0	520	0	525	0	525	0	525	0	535	0	525	0	525	0	525	0	525	0
11.6281	0	525	0	525	0	525	0	525	0	530	0	525	0	530	0	525	0	525	0	525	0	525	0	530	0	530	0	525	0	525	0	520	0	525	0	525	0	525	0	535	0	525	0	525	0	525	0	525	0
11.6381	0	525	0	525	0	525	0	525	0	530	0	525	0	530	0	525	0	525	0	525	0	525	0	530	0	530	0	525	0	525	0	520	0	525	0	525	0	525	0	535	0	525	0	525	0	525	0	525	0
11.6481	0	525	0	525	0	525	0	525	0	530	0	525	0	530	0	525	0	525	0	525	0	525	0	530	0	530	0	525	0	525	0	520	0	525	0	525	0	525	0	535	0	525	0	525	0	525	0	525	0
11.6581	0	525	0	525	0	525	0	525	0	530	0	525	0	530	0	525	0	525	0	525	0	525	0	530	0	530	0	525	0	525	0	520	0	525	0	525	0	525	0	535	0	525	0	525	0	525	0	525	0
11.6681	0	525	0	525	0	525	0	525	0	530	0	525	0	530	0	525	0	525	0	525	0	525	0	530	0	530	0	525	0	525	0	520	0	525	0	525	0	525	0	535	0	525	0	525	0	525	0	525	0
11.6781	0	525	0	525	0	525	0	525	0	530	0	525	0	530	0	525	0	525	0	525	0	525	0	530	0	530	0	525	0	525	0	520	0	525	0	525	0	525	0	535	0	525	0	525	0	525	0	525	0
11.6881	0	525	0	525	0	525	0	525	0	530	0	525	0	530	0	525	0	525	0	525	0	525	0	530	0	530	0	525	0	525	0	520	0	525	0	525	0	525	0	535	0	525	0	525	0	525	0	525	0
11.6982	0	525	0	525	0	525	0	525	0	530	0	525	0	530	0	525	0	525	0	525	0	525	0	530	0	530	0	525	0	525	0	520	0	525	0	525	0	525	0	535	0	525	0	525	0	525	0	525	0
11.7082	0	525	0	525	0	525	0	525	0	530	0	525	0	530	0	525	0	525	0	525	0	525	0	530	0	530	0	525	0	525	0	520	0	525	0	525	0	525	0	535	0	525	0	525	0	525	0	525	0
11.7182	0	525	0	525	0	525	0	525	0	530	0	525	0	530	0	525	0	525	0	525	0	525	0	530	0	530	0	525	0	525	0	520	0	525	0	525	0	525	0	535	0	525	0	525	0	525	0	525	0
11.7282	0	525	0	525	0	525	0	525	0	530	0	525	0	530	0	525	0	525	0	525	0	525	0	530	0	530	0	525	0	525	0	520	0	525	0	525	0	525	0	535	0	525	0	525	0	525	0	525	0
11.7382	0	525	0	525	0	525	0	525	0	530	0	525	0	530	0	525	0	525	0	525	0	525	0	530	0	530	0	525	0	525	0	520	0	525	0	525	0	525	0	535	0	525	0	525	0	525	0	525	0
11.7482	0	525	0	525	0	525	0	525	0	530	0	525	0	530	0	525	0	525	0	525	0	525	0	530	0	530	0	525	0	525	0	520	0	525	0	525	0	525	0	535	0	525	0	525	0	525	0	525	0
11.7583	0	525	0	525	0	525	0	525	0	530	0	525	0	530	0	525	0	525	0	525	0	525	0	530	0	530	0	525	0	525	0	520	0	525	0	525	0	525	0	535	0	525	0	525	0	525	0	525	0
11.7683	0	525	0	525	0	525	0	525	0	530	0	525	0	530	0	525	0	525	0	525	0	525	0	530	0	530	0	525	0	525	0	520	0	525	0	525	0	525	0	535	0	525	0	525	0	525	0	525	0
11.7783	0	525	0	525	0	525	0	525	0	530	0	525	0	530	0	525	0	525	0	525	0	525	0	530	0	530	0	525	0	525	0	520	0	525	0	525	0	525	0	535	0	525	0	525	0	525	0	525	0
11.7883	0	525	0	525	0	525	0	525	0	530	0	525	0	530	0	525	0	525	0	525	0	525	0	530	0	530	0	525	0	525	0	520	0	525	0	525	0	525	0	535	0	525	0	525	0	525	0	525	0
11.7983	0	525	0	525	0	525	0	525	0	530	0	525	0	530	0	525	0	525	0	525	0	525	0	530	0	530	0	525	0	525	0	520	0	525	0	525	0	525	0	535	0	525	0	525	0	525	0	525	0
11.8083	0	525	0	525	0	525	0	525	0	530	0	525	0	530	0	525	0	525	0	525	0	525	0	530	0	530	0	525	0	525	0	520	0	525	0	525	0	525	0	535	0	525	0	525	0	525	0	525	0
11.8183	0	525	0	525	0	525	0	525	0	530	0	525	0	530	0	525	0	525	0	525	0	525	0	530	0	530	0	525	0	525	0	520	0	525	0	525	0	525	0	535	0	525	0	525	0	525	0	525	0
11.8284	0	525	0	525	0	525	0	525	0	530	0	525	0	530	0	525	0	525	0	525	0	525	0	530	0	530	0	525	0	525	0	520	0	525	0	525	0	525	0	535	0	525	0	525	0	525	0	525	0
11.8384	0	525	0	525	0	525	0	525	0	530	0	525	0	530	0	525	0	525	0	525	0	525	0	530	0	530	0	525	0	525	0	520	0	525	0	525	0	525	0	535	0	525	0	525	0	525	0	525	0
11.8484	0	525	0	525	0	525	0	525	0	530	0	525	0	530	0	525	0	525	0	525	0	525	0	530	0	530	0	525	0	525	0	520	0	525	0	525	0	525	0	535	0	525	0	525	0	525	0	525	0
11.8584	0	525	0	525	0	525	0	525	0	530	0	525	0	530	0	525	0	525	0	525	0	525	0	530	0	530	0	525	0	525	0	520	0	525	0	525	0	525	0	535	0	525	0	525	0	525	0	525	0
11.8684	0	525	0	525	0	525	0	525	0	530	0	525	0	530	0	525	0	525	0	525	0	525	0	530	0	530	0	525	0	525	0	520	0	525	0	525	0	525	0	535	0	525	0	525	0	525	0	525	0
11.8784	0	525	0	525	0	525	0	525	0	530	0	525	0	530	0	525	0	525	0	525	0	525	0	530	0	530	0	525	0	525	0	520	0	525	0	525	0	525	0	535	0	525	0	525	0	525	0	525	0
11.8885	0	525	0	525	0	525	0	525	0	530	0	525	0	530	0	525	0	525	0	525	0	525	0	530	0	530	0	525	0	525	0	520	0	525	0	525	0	525	0	535	0	525	0	525	0	525	0	525	0
11.8985	0	525	0	525	0	525	0	525	0	530	0	525	0	530	0	525	0	525	0	525	0	525	0	530	0	530	0	525	0	525	0	520	0	525	0	525	0	525	0	535	0	525	0	525	0	525	0	525	0
11.9085	0	525	0	525	0	525	0	525	0	530	0	525	0	530	0	525	0	525	0	525	0	525	0	530	0	530	0	525	0	525	0	520	0	525	0	525	0	525	0	535	0	525	0	525	0	525	0	525	0
11.9185	0	525	0	525	0	525	0	525	0	530	0	525	0	530	0	525	0	525	0	525	0	525	0	530	0	530	0	525	0	525	0	520	0	525	0	525	0	525	0	535	0	525	0	525	0	525	0	525	0
11.9285	0	525	0	525	0	525	0	525	0	530	0	525	0	530	0	525	0	525	0	525	0	525	0	530	0	530	0	525	0	525	0	520	0	525	0	525	0	525	0	535	0	525	0	525	0	525	0	525	0
11.9385	0	525	0	525	0	525	0	525	0	530	0	525	0	530	0	525	0	525	0	525	0	525	0	530	0	530	0	525	0	525	0	520	0	525	0	525	0	525	0	535	0	525	0	525	0	525	0	525	0
11.9485	0	525	0	525	0	525	0	525	0	530	0	525	0	530	0	525	0	525	0	525	0	525	0	530	0	530	0	525	0	525	0	520	0	525	0	525	0	525	0	535	0	525	0	525	0	525	0	525	0
11.9586	0	525	0	525	0	525	0	525	0	530	0	525	0	530	0	525	0	525	0	525	0	525	0	530	0	530	0	525	0	525	0	520	0	525	0	525	0	525	0	535	0	525	0	525	0	525	0	525	0
11.9686	0	525	0	525	0	525	0	525	0	530	0	525	0	530	0	525	0	525	0	525	0	525	0	530	0	530	0	525	0	525	0	520	0	525	0	525	0	525	0	535	0	525	0	525	0	525	0	525	0
11.9786	0	525	0	525	0	525	0	525	0	530	0	525	0	530	0	525	0	525	0	525	0	525	0	530	0	530	0	525	0	525	0	520	0	525	0	525	0	525	0	535	0	525	0	525	0	525	0	525	0
11.9886	0	525	0	525	0	525	0	525	0	530	0	525	0	530	0	525	0	525	0	525	0	525	0	530	0	530	0	525	0	525	0	520	0	525	0	525	0	525	0	535	0	525	0	525	0	525	0	525	0
11.9986	0	525	0	525	0	525	0	525	0	530	0	525	0	530	0	525	0	525	0	525	0	525	0	530	0	530	0	525	0	525	0	520	0	525	0	525	0	525	0	535	0	525	0	525	0	525	0	525	0
12.0086	0	525	0	525	0	525	0	525	0	530	0	525	0	530	0	525	0	525	0	525	0	525	0	530	0	530	0	525	0	525	0	520	0	525	0	525	0	525	0	535	0	525	0	525	0	525	0	525	0
12.0187	0	525	0	525	0	525	0	525	0	530	0	525	0	530	0	525	0	525	0	525	0	525	0	530	0	530	0	525	0	525	0	520	0	525	0	525	0	525	0	535	0	525	0	525	0	525	0	525	0
12.0287	0	525	0	525	0	525	0	525	0	530	0	525	0	530	0	525	0	525	0	525	0	525	0	530	0	530	0	525	0	525	0	520	0	525	0	525	0	525	0	535	0	525	0	525	0	525	0	525	0
12.0387	0	525	0	525	0	525	0	525	0	530	0	525	0	530	0	525	0	525	0	525	0	525	0	530	0	530	0	525	0	525	0	520	0	525	0	525	0	525	0	535	0	525	0	525	0	525	0	525	0
12.0487	0	525	0	525	0	525	0	525	0	530	0	525	0	530	0	525	0	525	0	525	0	525	0	530	0	530	0	525	0	525	0	520	0	525	0	525	0	525	0	535	0	525	0	525	0	525	0	525	0
12.0587	0	525	0	525	0	525	0	525	0	530	0	525	0	530	0	525	0	525	0	525	0	525	0	530	0	530	0	525	0	525	0	520	0	525	0	525	0	525	0	535	0	525	0	525	0	525	0	525	0
12.0687	0	525	0	525	0	525	0	525	0	530	0	525	0	530	0	525	0	525	0	525	0	525	0	530	0	530	0	525	0	525	0	520	0	525	0	525	0	525	0	535	0	525	0	525	0	525	0	525	0
12.0788	0	525	0	525	0	525	0	525	0	530	0	525	0	530	0	525	0	525	0	525	0	525	0	530	0	530	0	525	0	525	0	520	0	525	0	525	0	525	0	535	0	525	0	525	0	525	0	525	0
12.0888	0	525	0	525	0	525	0	525	0	530	0	525	0	530	0	525	0	525	0	525	0	525	0	530	0	530	0	525	0	525	0	520	0	525	0	525	0	525	0	535	0	525	0	525	0	525	0	525	0
12.0988	0	525	0	525	0	525	0	525	0	530	0	525	0	530	0	525	0	525	0	525	0	525	0	530	0	530	0	525	0	525	0	520	0	525	0	525	0	525	0	535	0	525	0	525	0	525	0	525	0
12.1088	0	525	0	525	0	525	0	525	0	530	0	525	0	530	0	525	0	525	0	525	0	525	0	530	0	530	0	525	0	525	0	520	0	525	0	525	0	525	0	535	0	525	0	525	0	525	0	525	0
12.1188	0	525	0	525	0	525	0	525	0	530	0	525	0	530	0	525	0	525	0	525	0	525	0	530	0	530	0	525	0	525	0	520	0	525	0	525	0	525	0	535	0	525	0	525	0	525	0	525	0
12.1288	0	525	0	525	0	525	0	525	0	530	0	525	0	530	0	525	0	525	0	525	0	525	0	530	0	530	0	525	0	525	0	520	0	525	0	525	0	525	0	535	0	525	0	525	0	525	0	525	0
12.1388	0	525	0	525	0	525	0	525	0	530	0	525	0	530	0	525	0	525	0	525	0	525	0	530	0	530	0	525	0	525	0	520	0	525	0	525	0	525	0	535	0	525	0	525	0	525	0	525	0
12.1489	0	525	0	525	0	525	0	525	0	530	0	525	0	530	0	525	0	525	0	525	0	525	0	530	0	530	0	525	0	525	0	520	0	525	0	525	0	525	0	535	0	525	0	525	0	525	0	525	0
12.1589	0	525	0	525	0	525	0	525	0	530	0	525	0	530	0	525	0	525	0	525	0	525	0	530	0	530	0	525	0	525	0	520	0	525	0	525	0	525	0	535	0	525	0	525	0	525	0	525	0
12.1689	0	525	0	525	0	525	0	525	0	530	0	525	0	530	0	525	0	525	0	525	0	525	0	530	0	530	0	525	0	525	0	520	0	525	0	525	0	525	0	535	0	525	0	525	0	525	0	525	0
12.1789	0	525	0	525	0	525	0	525	0	530	0	525	0	530	0	525	0	525	0	525	0	525	0	530	0	530	0	525	0	525	0	520	0	525	0	525	0	525	0	535	0	525	0	525	0	525	0	525	0
12.1889	0	525	0	525	0	525	0	525	0	530	0	525	0	530	0	525	0	525	0	525	0	525	0	530	0	530	0	525	0	525	0	520	0	525	0	525	0	525	0	535	0	525	0	525	0	525	0	525	0
12.1989	0	525	0	525	0	525	0	525	0	530	0	525	0	530	0	525	0	525	0	525	0	525	0	530	0	530	0	525	0	525	0	520	0	525	0	525	0	525	0	535	0	525	0	525	0	525	0	525	0
12.209	0	525	0	525	0	525	0	525	0	530	0	525	0	530	0	525	0	525	0	525	0	525	0	530	0	530	0	525	0	525	0	520	0	525	0	525	0	525	0	535	0	525	0	525	0	525	0	525	0
12.219	0	525	0	525	0	525	0	525	0	530	0	525	0	530	0	525	0	525	0	525	0	525	0	530	0	530	0	525	0	525	0	520	0	525	0	525	0	525	0	535	0	525	0	525	0	525	0	525	0
12.229	0	525	0	525	0	525	0	525	0	530	0	525	0	530	0	525	0	525	0	525	0	525	0	530	0	530	0	525	0	525	0	520	0	525	0	525	0	525	0	535	0	525	0	525	0	525	0	525	0
12.239	0	525	0	525	0	525	0	525	0	530	0	525	0	530	0	525	0	525	0	525	0	525	0	530	0	530	0	525	0	525	0	520	0	525	0	525	0	525	0	535	0	525	0	525	0	525	0	525	0
12.249	0	525	0	525	0	525	0	525	0	530	0	525	0	530	0	525	0	525	0	525	0	525	0	530	0	530	0	525	0	525	0	520	0	525	0	525	0	525	0	535	0	525	0	525	0	525	0	525	0
12.259	0	525	0	525	0	525	0	525	0	530	0	525	0	530	0	525	0	525	0	525	0	525	0	530	0	530	0	525	0	525	0	520	0	525	0	525	0	525	0	535	0	525	0	525	0	525	0	525	0
12.269	0	525	0	525	0	525	0	525	0	530	0	525	0	530	0	525	0	525	0	525	0	525	0	530	0	530	0	525	0	525	0	520	0	525	0	525	0	525	0	535	0	525	0	525	0	525	0	525	0
12.2791	0	525	0	525	0	525	0	525	0	530	0	525	0	530	0	525	0	525	0	525	0	525	0	530	0	530	0	525	0	525	0	520	0	525	0	525	0	525	0	535	0	525	0	525	0	525	0	525	0
12.2891	0	525	0	525	0	525	0	525	0	530	0	525	0	530	0	525	0	525	0	525	0	525	0	530	0	530	0	525	0	525	0	520	0	525	0	525	0	525	0	535	0	525	0	525	0	525	0	525	0
12.2991	0	525	0	525	0	525	0	525	0	530	0	525	0	530	0	525	0	525	0	525	0	525	0	530	0	530	0	525	0	525	0	520	0	525	0	525	0	525	0	535	0	525	0	525	0	525	0	525	0
12.3091	0	525	0	525	0	525	0	525	0	530	0	525	0	530	0	525	0	525	0	525	0	525	0	530	0	530	0	525	0	525	0	520	0	525	0	525	0	525	0	535	0	525	0	525	0	525	0	525	0
12.3191	0	525	0	525	0	525	0	525	0	530	0	525	0	530	0	525	0	525	0	525	0	525	0	530	0	530	0	525	0	525	0	520	0	525	0	525	0	525	0	535	0	525	0	525	0	525	0	525	0
12.3291	0	525	0	525	0	525	0	525	0	530	0	525	0	530	0	525	0	525	0	525	0	525	0	530	0	530	0	525	0	525	0	520	0	525	0	525	0	525	0	535	0	525	0	525	0	525	0	525	0
12.3392	0	525	0	525	0	525	0	525	0	530	0	525	0	530	0	525	0	525	0	525	0	525	0	530	0	530	0	525	0	525	0	520	0	525	0	525	0	525	0	535	0	525	0	525	0	525	0	525	0
12.3492	0	525	0	525	0	525	0	525	0	530	0	525	0	530	0	525	0	525	0	525	0	525	0	530	0	530	0	525	0	525	0	520	0	525	0	525	0	525	0	535	0	525	0	525	0	525	0	525	0
12.3592	0	525	0	525	0	525	0	525	0	530	0	525	0	530	0	525	0	525	0	525	0	525	0	530	0	530	0	525	0	525	0	520	0	525	0	525	0	525	0	535	0	525	0	525	0	525	0	525	0
12.3692	0	525	0	525	0	525	0	525	0	530	0	525	0	530	0	525	0	525	0	525	0	525	0	530	0	530	0	525	0	525	0	520	0	525	0	525	0	525	0	535	0	525	0	525	0	525	0	525	0
12.3792	0	525	0	525	0	525	0	525	0	530	0	525	0	530	0	525	0	525	0	525	0	525	0	530	0	530	0	525	0	525	0	520	0	525	0	525	0	525	0	535	0	525	0	525	0	525	0	525	0
12.3892	0	525	0	525	0	525	0	525	0	530	0	525	0	530	0	525	0	525	0	525	0	525	0	530	0	530	0	525	0	525	0	520	0	525	0	525	0	525	0	535	0	525	0	525	0	525	0	525	0
12.3992	0	525	0	525	0	525	0	525	0	530	0	525	0	530	0	525	0	525	0	525	0	525	0	530	0	530	0	525	0	525	0	520	0	525	0	525	0	525	0	535	0	525	0	525	0	525	0	525	0
12.4093	0	525	0	525	0	525	0	525	0	530	0	525	0	530	0	525	0	525	0	525	0	525	0	530	0	530	0	525	0	525	0	520	0	525	0	525	0	525	0	535	0	525	0	525	0	525	0	525	0
12.4193	0	525	0	525	0	525	0	525	0	530	0	525	0	530	0	525	0	525	0	525	0	525	0	530	0	530	0	525	0	525	0	520	0	525	0	525	0	525	0	535	0	525	0	525	0	525	0	525	0
12.4293	0	525	0	525	0	525	0	525	0	530	0	525	0	530	0	525	0	525	0	525	0	525	0	530	0	530	0	525	0	525	0	520	0	525	0	525	0	525	0	535	0	525	0	525	0	525	0	525	0
12.4393	0	525	0	525	0	525	0	525	0	530	0	525	0	530	0	525	0	525	0	525	0	525	0	530	0	530	0	525	0	525	0	520	0	525	0	525	0	525	0	535	0	525	0	525	0	525	0	525	0
12.4493	0	525	0	525	0	525	0	525	0	530	0	525	0	530	0	525	0	525	0	525	0	525	0	530	0	530	0	525	0	525	0	520	0	525	0	525	0	525	0	535	0	525	0	525	0	525	0	525	0
12.4593	0	525	0	525	0	525	0	525	0	530	0	525	0	530	0	525	0	525	0	525	0	525	0	530	0	530	0	525	0	525	0	520	0	525	0	525	0	525	0	535	0	525	0	525	0	525	0	525	0
12.4694	0	525	0	525	0	525	0	525	0	530	0	525	0	530	0	525	0	525	0	525	0	525	0	530	0	530	0	525	0	525	0	520	0	525	0	525	0	525	0	535	0	525	0	525	0	525	0	525	0
12.4794	0	525	0	525	0	525	0	525	0	530	0	525	0	530	0	525	0	525	0	525	0	525	0	530	0	530	0	525	0	525	0	520	0	525	0	525	0	525	0	535	0	525	0	525	0	525	0	525	0
12.4894	0	525	0	525	0	525	0	525	0	530	0	525	0	530	0	525	0	525	0	525	0	525	0	530	0	530	0	525	0	525	0	520	0	525	0	525	0	525	0	535	0	525	0	525	0	525	0	525	0
12.4994	0	525	0	525	0	525	0	525	0	530	0	525	0	530	0	525	0	525	0	525	0	525	0	530	0	530	0	525	0	525	0	520	0	525	0	525	0	525	0	535	0	525	0	525	0	525	0	525	0
12.5094	0	525	0	525	0	525	0	525	0	530	0	525	0	530	0	525	0	525	0	525	0	525	0	530	0	530	0	525	0	525	0	520	0	525	0	525	0	525	0	535	0	525	0	525	0	525	0	525	0
12.5194	0	525	0	525	0	525	0	525	0	530	0	525	0	530	0	525	0	525	0	525	0	525	0	530	0	530	0	525	0	525	0	520	0	525	0	525	0	525	0	535	0	525	0	525	0	525	0	525	0
12.5295	0	525	0	525	0	525	0	525	0	530	0	525	0	530	0	525	0	525	0	525	0	525	0	530	0	530	0	525	0	525	0	520	0	525	0	525	0	525	0	535	0	525	0	525	0	525	0	525	0
12.5395	0	525	0	525	0	525	0	525	0	530	0	525	0	530	0	525	0	525	0	525	0	525	0	530	0	530	0	525	0	525	0	520	0	525	0	525	0	525	0	535	0	525	0	525	0	525	0	525	0
12.5495	0	525	0	525	0	525	0	525	0	530	0	525	0	530	0	525	0	525	0	525	0	525	0	530	0	530	0	525	0	525	0	520	0	525	0	525	0	525	0	535	0	525	0	525	0	525	0	525	0
12.5595	0	525	0	525	0	525	0	525	0	530	0	525	0	530	0	525	0	525	0	525	0	525	0	530	0	530	0	525	0	525	0	520	0	525	0	525	0	525	0	535	0	525	0	525	0	525	0	525	0
12.5695	0	525	0	525	0	525	0	525	0	530	0	525	0	530	0	525	0	525	0	525	0	525	0	530	0	530	0	525	0	525	0	520	0	525	0	525	0	525	0	535	0	525	0	525	0	525	0	525	0
12.5795	0	525	0	525	0	525	0	525	0	530	0	525	0	530	0	525	0	525	0	525	0	525	0	530	0	530	0	525	0	525	0	520	0	525	0	525	0	525	0	535	0	525	0	525	0	525	0	525	0
12.5895	0	525	0	525	0	525	0	525	0	530	0	525	0	530	0	525	0	525	0	525	0	525	0	530	0	530	0	525	0	525	0	520	0	525	0	525	0	525	0	535	0	525	0	525	0	525	0	525	0
12.5996	0	525	0	525	0	525	0	525	0	530	0	525	0	530	0	525	0	525	0	525	0	525	0	530	0	530	0	525	0	525	0	520	0	525	0	525	0	525	0	535	0	525	0	525	0	525	0	525	0
12.6096	0	525	0	525	0	525	0	525	0	530	0	525	0	530	0	525	0	525	0	525	0	525	0	530	0	530	0	525	0	525	0	520	0	525	0	525	0	525	0	535	0	525	0	525	0	525	0	525	0
12.6196	0	525	0	525	0	525	0	525	0	530	0	525	0	530	0	525	0	525	0	525	0	525	0	530	0	530	0	525	0	525	0	520	0	525	0	525	0	525	0	535	0	525	0	525	0	525	0	525	0
12.6296	0	525	0	525	0	525	0	525	0	530	0	525	0	530	0	525	0	525	0	525	0	525	0	530	0	530	0	525	0	525	0	520	0	525	0	525	0	525	0	535	0	525	0	525	0	525	0	525	0
12.6396	0	525	0	525	0	525	0	525	0	530	0	525	0	530	0	525	0	525	0	525	0	525	0	530	0	530	0	525	0	525	0	520	0	525	0	525	0	525	0	535	0	525	0	525	0	525	0	525	0
12.6496	0	525	0	525	0	525	0	525	0	530	0	525	0	530	0	525	0	525	0	525	0	525	0	530	0	530	0	525	0	525	0	520	0	525	0	525	0	525	0	535	0	525	0	525	0	525	0	525	0
12.6597	0	525	0	525	0	525	0	525	0	530	0	525	0	530	0	525	0	525	0	525	0	525	0	530	0	530	0	525	0	525	0	520	0	525	0	525	0	525	0	535	0	525	0	525	0	525	0	525	0
12.6697	0	525	0	525	0	525	0	525	0	530	0	525	0	530	0	525	0	525	0	525	0	525	0	530	0	530	0	525	0	525	0	520	0	525	0	525	0	525	0	535	0	525	0	525	0	525	0	525	0
12.6797	0	525	0	525	0	525	0	525	0	530	0	525	0	530	0	525	0	525	0	525	0	525	0	530	0	530	0	525	0	525	0	520	0	525	0	525	0	525	0	535	0	525	0	525	0	525	0	525	0
12.6897	0	525	0	525	0	525	0	525	0	530	0	525	0	530	0	525	0	525	0	525	0	525	0	530	0	530	0	525	0	525	0	520	0	525	0	525	0	525	0	535	0	525	0	525	0	525	0	525	0
12.6997	0	525	0	525	0	525	0	525	0	530	0	525	0	530	0	525	0	525	0	525	0	525	0	530	0	530	0	525	0	525	0	520	0	525	0	525	0	525	0	535	0	525	0	525	0	525	0	525	0
12.7097	0	525	0	525	0	525	0	525	0	530	0	525	0	530	0	525	0	525	0	525	0	525	0	530	0	530	0	525	0	525	0	520	0	525	0	525	0	525	0	535	0	525	0	525	0	525	0	525	0
12.7197	0	525	0	525	0	525	0	525	0	530	0	525	0	530	0	525	0	525	0	525	0	525	0	530	0	530	0	525	0	525	0	520	0	525	0	525	0	525	0	535	0	525	0	525	0	525	0	525	0
12.7298	0	525	0	525	0	525	0	525	0	530	0	525	0	530	0	525	0	525	0	525	0	525	0	530	0	530	0	525	0	525	0	520	0	525	0	525	0	525	0	535	0	525	0	525	0	525	0	525	0
12.7398	0	525	0	525	0	525	0	525	0	530	0	525	0	530	0	525	0	525	0	525	0	525	0	530	0	530	0	525	0	525	0	520	0	525	0	525	0	525	0	535	0	525	0	525	0	525	0	525	0
12.7498	0	525	0	525	0	525	0	525	0	530	0	525	0	530	0	525	0	525	0	525	0	525	0	530	0	530	0	525	0	525	0	520	0	525	0	525	0	525	0	535	0	525	0	525	0	525	0	525	0
12.7598	0	525	0	525	0	525	0	525	0	530	0	525	0	530	0	525	0	525	0	525	0	525	0	530	0	530	0	525	0	525	0	520	0	525	0	525	0	525	0	535	0	525	0	525	0	525	0	525	0
12.7698	0	525	0	525	0	525	0	525	0	530	0	525	0	530	0	525	0	525	0	525	0	525	0	530	0	530	0	525	0	525	0	520	0	525	0	525	0	525	0	535	0	525	0	525	0	525	0	525	0
12.7798	0	525	0	525	0	525	0	525	0	530	0	525	0	530	0	525	0	525	0	525	0	525	0	530	0	530	0	525	0	525	0	520	0	525	0	525	0	525	0	535	0	525	0	525	0	525	0	525	0
12.7899	0	525	0	525	0	525	0	525	0	530	0	525	0	530	0	525	0	525	0	525	0	525	0	530	0	530	0	525	0	525	0	520	0	525	0	525	0	525	0	535	0	525	0	525	0	525	0	525	0
12.7999	0	525	0	525	0	525	0	525	0	530	0	525	0	530	0	525	0	525	0	525	0	525	0	530	0	530	0	525	0	525	0	520	0	525	0	525	0	525	0	535	0	525	0	525	0	525	0	525	0
12.8099	0	525	0	525	0	525	0	525	0	530	0	525	0	530	0	525	0	525	0	525	0	525	0	530	0	530	0	525	0	525	0	520	0	525	0	525	0	525	0	535	0	525	0	525	0	525	0	525	0
12.8199	0	525	0	525	0	525	0	525	0	530	0	525	0	530	0	525	0	525	0	525	0	525	0	530	0	530	0	525	0	525	0	520	0	525	0	525	0	525	0	535	0	525	0	525	0	525	0	525	0
12.8299	0	525	0	525	0	525	0	525	0	530	0	525	0	530	0	525	0	525	0	525	0	525	0	530	0	530	0	525	0	525	0	520	0	525	0	525	0	525	0	535	0	525	0	525	0	525	0	525	0
12.8399	0	525	0	525	0	525	0	525	0	530	0	525	0	530	0	525	0	525	0	525	0	525	0	530	0	530	0	525	0	525	0	520	0	525	0	525	0	525	0	535	0	525	0	525	0	525	0	525	0
12.8499	0	525	0	525	0	525	0	525	0	530	0	525	0	530	0	525	0	525	0	525	0	525	0	530	0	530	0	525	0	525	0	520	0	525	0	525	0	525	0	535	0	525	0	525	0	525	0	525	0
12.86	0	525	0	525	0	525	0	525	0	530	0	525	0	530	0	525	0	525	0	525	0	525	0	530	0	530	0	525	0	525	0	520	0	525	0	525	0	525	0	535	0	525	0	525	0	525	0	525	0
12.87	0	525	0	525	0	525	0	525	0	530	0	525	0	530	0	525	0	525	0	525	0	525	0	530	0	530	0	525	0	525	0	520	0	525	0	525	0	525	0	535	0	525	0	525	0	525	0	525	0
12.88	0	525	0	525	0	525	0	525	0	530	0	525	0	530	0	525	0	525	0	525	0	525	0	530	0	530	0	525	0	525	0	520	0	525	0	525	0	525	0	535	0	525	0	525	0	525	0	525	0
12.89	0	525	0	525	0	525	0	525	0	530	0	525	0	530	0	525	0	525	0	525	0	525	0	530	0	530	0	525	0	525	0	520	0	525	0	525	0	525	0	535	0	525	0	525	0	525	0	525	0
12.9	0	525	0	525	0	525	0	525	0	530	0	525	0	530	0	525	0	525	0	525	0	525	0	530	0	530	0	525	0	525	0	520	0	525	0	525	0	525	0	535	0	525	0	525	0	525	0	525	0
12.91	0	525	0	525	0	525	0	525	0	530	0	525	0	530	0	525	0	525	0	525	0	525	0	530	0	530	0	525	0	525	0	520	0	525	0	525	0	525	0	535	0	525	0	525	0	525	0	525	0
12.9201	0	525	0	525	0	525	0	525	0	530	0	525	0	530	0	525	0	525	0	525	0	525	0	530	0	530	0	525	0	525	0	520	0	525	0	525	0	525	0	535	0	525	0	525	0	525	0	525	0
12.9301	0	525	0	525	0	525	0	525	0	530	0	525	0	530	0	525	0	525	0	525	0	525	0	530	0	530	0	525	0	525	0	520	0	525	0	525	0	525	0	535	0	525	0	525	0	525	0	525	0
12.9401	0	525	0	525	0	525	0	525	0	530	0	525	0	530	0	525	0	525	0	525	0	525	0	530	0	530	0	525	0	525	0	520	0	525	0	525	0	525	0	535	0	525	0	525	0	525	0	525	0
12.9501	0	525	0	525	0	525	0	525	0	530	0	525	0	530	0	525	0	525	0	525	0	525	0	530	0	530	0	525	0	525	0	520	0	525	0	525	0	525	0	535	0	525	0	525	0	525	0	525	0
12.9601	0	525	0	525	0	525	0	525	0	530	0	525	0	530	0	525	0	525	0	525	0	525	0	530	0	530	0	525	0	525	0	520	0	525	0	525	0	525	0	535	0	525	0	525	0	525	0	525	0
12.9701	0	525	0	525	0	525	0	525	0	530	0	525	0	530	0	525	0	525	0	525	0	525	0	530	0	530	0	525	0	525	0	520	0	525	0	525	0	525	0	535	0	525	0	525	0	525	0	525	0
12.9801	0	525	0	525	0	525	0	525	0	530	0	525	0	530	0	525	0	525	0	525	0	525	0	530	0	530	0	525	0	525	0	520	0	525	0	525	0	525	0	535	0	525	0	525	0	525	0	525	0
12.9902	0	525	0	525	0	525	0	525	0	530	0	525	0	530	0	525	0	525	0	525	0	525	0	530	0	530	0	525	0	525	0	520	0	525	0	525	0	525	0	535	0	525	0	525	0	525	0	525	0
13.0002	0	525	0	525	0	525	0	525	0	530	0	525	0	530	0	525	0	525	0	525	0	525	0	530	0	530	0	525	0	525	0	520	0	525	0	525	0	525	0	535	0	525	0	525	0	525	0	525	0
13.0102	0	525	0	525	0	525	0	525	0	530	0	525	0	530	0	525	0	525	0	525	0	525	0	530	0	530	0	525	0	525	0	520	0	525	0	525	0	525	0	535	0	525	0	525	0	525	0	525	0
13.0202	0	525	0	525	0	525	0	525	0	530	0	525	0	530	0	525	0	525	0	525	0	525	0	530	0	530	0	525	0	525	0	520	0	525	0	525	0	525	0	535	0	525	0	525	0	525	0	525	0
13.0302	0	525	0	525	0	525	0	525	0	530	0	525	0	530	0	525	0	525	0	525	0	525	0	530	0	530	0	525	0	525	0	520	0	525	0	525	0	525	0	535	0	525	0	525	0	525	0	525	0
13.0402	0	525	0	525	0	525	0	525	0	530	0	525	0	530	0	525	0	525	0	525	0	525	0	530	0	530	0	525	0	525	0	520	0	525	0	525	0	525	0	535	0	525	0	525	0	525	0	525	0
13.0503	0	525	0	525	0	525	0	525	0	530	0	525	0	530	0	525	0	525	0	525	0	525	0	530	0	530	0	525	0	525	0	520	0	525	0	525	0	525	0	535	0	525	0	525	0	525	0	525	0
13.0603	0	525	0	525	0	525	0	525	0	530	0	525	0	530	0	525	0	525	0	525	0	525	0	530	0	530	0	525	0	525	0	520	0	525	0	525	0	525	0	535	0	525	0	525	0	525	0	525	0
13.0703	0	525	0	525	0	525	0	525	0	530	0	525	0	530	0	525	0	525	0	525	0	525	0	530	0	530	0	525	0	525	0	520	0	525	0	525	0	525	0	535	0	525	0	525	0	525	0	525	0
13.0803	0	525	0	525	0	525	0	525	0	530	0	525	0	530	0	525	0	525	0	525	0	525	0	530	0	530	0	525	0	525	0	520	0	525	0	525	0	525	0	535	0	525	0	525	0	525	0	525	0
13.0903	0	525	0	525	0	525	0	525	0	530	0	525	0	530	0	525	0	525	0	525	0	525	0	530	0	530	0	525	0	525	0	520	0	525	0	525	0	525	0	535	0	525	0	525	0	525	0	525	0
13.1003	0	525	0	525	0	525	0	525	0	530	0	525	0	530	0	525	0	525	0	525	0	525	0	530	0	530	0	525	0	525	0	520	0	525	0	525	0	525	0	535	0	525	0	525	0	525	0	525	0
13.1104	0	525	0	525	0	525	0	525	0	530	0	525	0	530	0	525	0	525	0	525	0	525	0	530	0	530	0	525	0	525	0	520	0	525	0	525	0	525	0	535	0	525	0	525	0	525	0	525	0
13.1204	0	525	0	525	0	525	0	525	0	530	0	525	0	530	0	525	0	525	0	525	0	525	0	530	0	530	0	525	0	525	0	520	0	525	0	525	0	525	0	535	0	525	0	525	0	525	0	525	0
13.1304	0	525	0	525	0	525	0	525	0	530	0	525	0	530	0	525	0	525	0	525	0	525	0	530	0	530	0	525	0	525	0	520	0	525	0	525	0	525	0	535	0	525	0	525	0	525	0	525	0
13.1404	0	525	0	525	0	525	0	525	0	530	0	525	0	530	0	525	0	525	0	525	0	525	0	530	0	530	0	525	0	525	0	520	0	525	0	525	0	525	0	535	0	525	0	525	0	525	0	525	0
13.1504	0	525	0	525	0	525	0	525	0	530	0	525	0	530	0	525	0	525	0	525	0	525	0	530	0	530	0	525	0	525	0	520	0	525	0	525	0	525	0	535	0	525	0	525	0	525	0	525	0
13.1604	0	525	0	525	0	525	0	525	0	530	0	525	0	530	0	525	0	525	0	525	0	525	0	530	0	530	0	525	0	525	0	520	0	525	0	525	0	525	0	535	0	525	0	525	0	525	0	525	0
13.1704	0	525	0	525	0	525	0	525	0	530	0	525	0	530	0	525	0	525	0	525	0	525	0	530	0	530	0	525	0	525	0	520	0	525	0	525	0	525	0	535	0	525	0	525	0	525	0	525	0
13.1805	0	525	0	525	0	525	0	525	0	530	0	525	0	530	0	525	0	525	0	525	0	525	0	530	0	530	0	525	0	525	0	520	0	525	0	525	0	525	0	535	0	525	0	525	0	525	0	525	0
13.1905	0	525	0	525	0	525	0	525	0	530	0	525	0	530	0	525	0	525	0	525	0	525	0	530	0	530	0	525	0	525	0	520	0	525	0	525	0	525	0	535	0	525	0	525	0	525	0	525	0
13.2005	0	525	0	525	0	525	0	525	0	530	0	525	0	530	0	525	0	525	0	525	0	525	0	530	0	530	0	525	0	525	0	520	0	525	0	525	0	525	0	535	0	525	0	525	0	525	0	525	0
13.2105	0	525	0	525	0	525	0	525	0	530	0	525	0	530	0	525	0	525	0	525	0	525	0	530	0	530	0	525	0	525	0	520	0	525	0	525	0	525	0	535	0	525	0	525	0	525	0	525	0
13.2205	0	525	0	525	0	525	0	525	0	530	0	525	0	530	0	525	0	525	0	525	0	525	0	530	0	530	0	525	0	525	0	520	0	525	0	525	0	525	0	535	0	525	0	525	0	525	0	525	0
13.2305	0	525	0	525	0	525	0	525	0	530	0	525	0	530	0	525	0	525	0	525	0	525	0	530	0	530	0	525	0	525	0	520	0	525	0	525	0	525	0	535	0	525	0	525	0	525	0	525	0
13.2406	0	525	0	525	0	525	0	525	0	530	0	525	0	530	0	525	0	525	0	525	0	525	0	530	0	530	0	525	0	525	0	520	0	525	0	525	0	525	0	535	0	525	0	525	0	525	0	525	0
13.2506	0	525	0	525	0	525	0	525	0	530	0	525	0	530	0	525	0	525	0	525	0	525	0	530	0	530	0	525	0	525	0	520	0	525	0	525	0	525	0	535	0	525	0	525	0	525	0	525	0
13.2606	0	525	0	525	0	525	0	525	0	530	0	525	0	530	0	525	0	525	0	525	0	525	0	530	0	530	0	525	0	525	0	520	0	525	0	525	0	525	0	535	0	525	0	525	0	525	0	525	0
13.2706	0	525	0	525	0	525	0	525	0	530	0	525	0	530	0	525	0	525	0	525	0	525	0	530	0	530	0	525	0	525	0	520	0	525	0	525	0	525	0	535	0	525	0	525	0	525	0	525	0
13.2806	0	525	0	525	0	525	0	525	0	530	0	525	0	530	0	525	0	525	0	525	0	525	0	530	0	530	0	525	0	525	0	520	0	525	0	525	0	525	0	535	0	525	0	525	0	525	0	525	0
13.2906	0	525	0	525	0	525	0	525	0	530	0	525	0	530	0	525	0	525	0	525	0	525	0	530	0	530	0	525	0	525	0	520	0	525	0	525	0	525	0	535	0	525	0	525	0	525	0	525	0
13.3006	0	525	0	525	0	525	0	525	0	530	0	525	0	530	0	525	0	525	0	525	0	525	0	530	0	530	0	525	0	525	0	520	0	525	0	525	0	525	0	535	0	525	0	525	0	525	0	525	0
13.3107	0	525	0	525	0	525	0	525	0	530	0	525	0	530	0	525	0	525	0	525	0	525	0	530	0	530	0	525	0	525	0	520	0	525	0	525	0	525	0	535	0	525	0	525	0	525	0	525	0
13.3207	0	525	0	525	0	525	0	525	0	530	0	525	0	530	0	525	0	525	0	525	0	525	0	530	0	530	0	525	0	525	0	520	0	525	0	525	0	525	0	535	0	525	0	525	0	525	0	525	0
13.3307	0	525	0	525	0	525	0	525	0	530	0	525	0	530	0	525	0	525	0	525	0	525	0	530	0	530	0	525	0	525	0	520	0	525	0	525	0	525	0	535	0	525	0	525	0	525	0	525	0
13.3407	0	525	0	525	0	525	0	525	0	530	0	525	0	530	0	525	0	525	0	525	0	525	0	530	0	530	0	525	0	525	0	520	0	525	0	525	0	525	0	535	0	525	0	525	0	525	0	525	0
13.3507	0	525	0	525	0	525	0	525	0	530	0	525	0	530	0	525	0	525	0	525	0	525	0	530	0	530	0	525	0	525	0	520	0	525	0	525	0	525	0	535	0	525	0	525	0	525	0	525	0
13.3607	0	525	0	525	0	525	0	525	0	530	0	525	0	530	0	525	0	525	0	525	0	525	0	530	0	530	0	525	0	525	0	520	0	525	0	525	0	525	0	535	0	525	0	525	0	525	0	525	0
13.3708	0	525	0	525	0	525	0	525	0	530	0	525	0	530	0	525	0	525	0	525	0	525	0	530	0	530	0	525	0	525	0	520	0	525	0	525	0	525	0	535	0	525	0	525	0	525	0	525	0
13.3808	0	525	0	525	0	525	0	525	0	530	0	525	0	530	0	525	0	525	0	525	0	525	0	530	0	530	0	525	0	525	0	520	0	525	0	525	0	525	0	535	0	525	0	525	0	525	0	525	0
13.3908	0	525	0	525	0	525	0	525	0	530	0	525	0	530	0	525	0	525	0	525	0	525	0	530	0	530	0	525	0	525	0	520	0	525	0	525	0	525	0	535	0	525	0	525	0	525	0	525	0
13.4008	0	525	0	525	0	525	0	525	0	530	0	525	0	530	0	525	0	525	0	525	0	525	0	530	0	530	0	525	0	525	0	520	0	525	0	525	0	525	0	535	0	525	0	525	0	525	0	525	0
13.4108	0	525	0	525	0	525	0	525	0	530	0	525	0	530	0	525	0	525	0	525	0	525	0	530	0	530	0	525	0	525	0	520	0	525	0	525	0	525	0	535	0	525	0	525	0	525	0	525	0
13.4208	0	525	0	525	0	525	0	525	0	530	0	525	0	530	0	525	0	525	0	525	0	525	0	530	0	530	0	525	0	525	0	520	0	525	0	525	0	525	0	535	0	525	0	525	0	525	0	525	0
13.4308	0	525	0	525	0	525	0	525	0	530	0	525	0	530	0	525	0	525	0	525	0	525	0	530	0	530	0	525	0	525	0	520	0	525	0	525	0	525	0	535	0	525	0	525	0	525	0	525	0
13.4409	0	525	0	525	0	525	0	525	0	530	0	525	0	530	0	525	0	525	0	525	0	525	0	530	0	530	0	525	0	525	0	520	0	525	0	525	0	525	0	535	0	525	0	525	0	525	0	525	0
13.4509	0	525	0	525	0	525	0	525	0	530	0	525	0	530	0	525	0	525	0	525	0	525	0	530	0	530	0	525	0	525	0	520	0	525	0	525	0	525	0	535	0	525	0	525	0	525	0	525	0
13.4609	0	525	0	525	0	525	0	525	0	530	0	525	0	530	0	525	0	525	0	525	0	525	0	530	0	530	0	525	0	525	0	520	0	525	0	525	0	525	0	535	0	525	0	525	0	525	0	525	0
13.4709	0	525	0	525	0	525	0	525	0	530	0	525	0	530	0	525	0	525	0	525	0	525	0	530	0	530	0	525	0	525	0	520	0	525	0	525	0	525	0	535	0	525	0	525	0	525	0	525	0
13.4809	0	525	0	525	0	525	0	525	0	530	0	525	0	530	0	525	0	525	0	525	0	525	0	530	0	530	0	525	0	525	0	520	0	525	0	525	0	525	0	535	0	525	0	525	0	525	0	525	0
13.4909	0	525	0	525	0	525	0	525	0	530	0	525	0	530	0	525	0	525	0	525	0	525	0	530	0	530	0	525	0	525	0	520	0	525	0	525	0	525	0	535	0	525	0	525	0	525	0	525	0
13.501	0	525	0	525	0	525	0	525	0	530	0	525	0	530	0	525	0	525	0	525	0	525	0	530	0	530	0	525	0	525	0	520	0	525	0	525	0	525	0	535	0	525	0	525	0	525	0	525	0
13.511	0	525	0	525	0	525	0	525	0	530	0	525	0	530	0	525	0	525	0	525	0	525	0	530	0	530	0	525	0	525	0	520	0	525	0	525	0	525	0	535	0	525	0	525	0	525	0	525	0
13.521	0	525	0	525	0	525	0	525	0	530	0	525	0	530	0	525	0	525	0	525	0	525	0	530	0	530	0	525	0	525	0	520	0	525	0	525	0	525	0	535	0	525	0	525	0	525	0	525	0
13.531	0	525	0	525	0	525	0	525	0	530	0	525	0	530	0	525	0	525	0	525	0	525	0	530	0	530	0	525	0	525	0	520	0	525	0	525	0	525	0	535	0	525	0	525	0	525	0	525	0
13.541	0	525	0	525	0	525	0	525	0	530	0	525	0	530	0	525	0	525	0	525	0	525	0	530	0	530	0	525	0	525	0	520	0	525	0	525	0	525	0	535	0	525	0	525	0	525	0	525	0
13.551	0	525	0	525	0	525	0	525	0	530	0	525	0	530	0	525	0	525	0	525	0	525	0	530	0	530	0	525	0	525	0	520	0	525	0	525	0	525	0	535	0	525	0	525	0	525	0	525	0
13.5611	0	525	0	525	0	525	0	525	0	530	0	525	0	530	0	525	0	525	0	525	0	525	0	530	0	530	0	525	0	525	0	520	0	525	0	525	0	525	0	535	0	525	0	525	0	525	0	525	0
13.5711	0	525	0	525	0	525	0	525	0	530	0	525	0	530	0	525	0	525	0	525	0	525	0	530	0	530	0	525	0	525	0	520	0	525	0	525	0	525	0	535	0	525	0	525	0	525	0	525	0
13.5811	0	525	0	525	0	525	0	525	0	530	0	525	0	530	0	525	0	525	0	525	0	525	0	530	0	530	0	525	0	525	0	520	0	525	0	525	0	525	0	535	0	525	0	525	0	525	0	525	0
13.5911	0	525	0	525	0	525	0	525	0	530	0	525	0	530	0	525	0	525	0	525	0	525	0	530	0	530	0	525	0	525	0	520	0	525	0	525	0	525	0	535	0	525	0	525	0	525	0	525	0
13.6011	0	525	0	525	0	525	0	525	0	530	0	525	0	530	0	525	0	525	0	525	0	525	0	530	0	530	0	525	0	525	0	520	0	525	0	525	0	525	0	535	0	525	0	525	0	525	0	525	0
13.6111	0	525	0	525	0	525	0	525	0	530	0	525	0	530	0	525	0	525	0	525	0	525	0	530	0	530	0	525	0	525	0	520	0	525	0	525	0	525	0	535	0	525	0	525	0	525	0	525	0
13.6211	0	525	0	525	0	525	0	525	0	530	0	525	0	530	0	525	0	525	0	525	0	525	0	530	0	530	0	525	0	525	0	520	0	525	0	525	0	525	0	535	0	525	0	525	0	525	0	525	0
13.6312	0	525	0	525	0	525	0	525	0	530	0	525	0	530	0	525	0	525	0	525	0	525	0	530	0	530	0	525	0	525	0	520	0	525	0	525	0	525	0	535	0	525	0	525	0	525	0	525	0
13.6412	0	525	0	525	0	525	0	525	0	530	0	525	0	530	0	525	0	525	0	525	0	525	0	530	0	530	0	525	0	525	0	520	0	525	0	525	0	525	0	535	0	525	0	525	0	525	0	525	0
13.6512	0	525	0	525	0	525	0	525	0	530	0	525	0	530	0	525	0	525	0	525	0	525	0	530	0	530	0	525	0	525	0	520	0	525	0	525	0	525	0	535	0	525	0	525	0	525	0	525	0
13.6612	0	525	0	525	0	525	0	525	0	530	0	525	0	530	0	525	0	525	0	525	0	525	0	530	0	530	0	525	0	525	0	520	0	525	0	525	0	525	0	535	0	525	0	525	0	525	0	525	0
13.6712	0	525	0	525	0	525	0	525	0	530	0	525	0	530	0	525	0	525	0	525	0	525	0	530	0	530	0	525	0	525	0	520	0	525	0	525	0	525	0	535	0	525	0	525	0	525	0	525	0
13.6812	0	525	0	525	0	525	0	525	0	530	0	525	0	530	0	525	0	525	0	525	0	525	0	530	0	530	0	525	0	525	0	520	0	525	0	525	0	525	0	535	0	525	0	525	0	525	0	525	0
13.6913	0	525	0	525	0	525	0	525	0	530	0	525	0	530	0	525	0	525	0	525	0	525	0	530	0	530	0	525	0	525	0	520	0	525	0	525	0	525	0	535	0	525	0	525	0	525	0	525	0
13.7013	0	525	0	525	0	525	0	525	0	530	0	525	0	530	0	525	0	525	0	525	0	525	0	530	0	530	0	525	0	525	0	520	0	525	0	525	0	525	0	535	0	525	0	525	0	525	0	525	0
13.7113	0	525	0	525	0	525	0	525	0	530	0	525	0	530	0	525	0	525	0	525	0	525	0	530	0	530	0	525	0	525	0	520	0	525	0	525	0	525	0	535	0	525	0	525	0	525	0	525	0
13.7213	0	525	0	525	0	525	0	525	0	530	0	525	0	530	0	525	0	525	0	525	0	525	0	530	0	530	0	525	0	525	0	520	0	525	0	525	0	525	0	535	0	525	0	525	0	525	0	525	0
13.7313	0	525	0	525	0	525	0	525	0	530	0	525	0	530	0	525	0	525	0	525	0	525	0	530	0	530	0	525	0	525	0	520	0	525	0	525	0	525	0	535	0	525	0	525	0	525	0	525	0
13.7413	0	525	0	525	0	525	0	525	0	530	0	525	0	530	0	525	0	525	0	525	0	525	0	530	0	530	0	525	0	525	0	520	0	525	0	525	0	525	0	535	0	525	0	525	0	525	0	525	0
13.7513	0	525	0	525	0	525	0	525	0	530	0	525	0	530	0	525	0	525	0	525	0	525	0	530	0	530	0	525	0	525	0	520	0	525	0	525	0	525	0	535	0	525	0	525	0	525	0	525	0
13.7614	0	525	0	525	0	525	0	525	0	530	0	525	0	530	0	525	0	525	0	525	0	525	0	530	0	530	0	525	0	525	0	520	0	525	0	525	0	525	0	535	0	525	0	525	0	525	0	525	0
13.7714	0	525	0	525	0	525	0	525	0	530	0	525	0	530	0	525	0	525	0	525	0	525	0	530	0	530	0	525	0	525	0	520	0	525	0	525	0	525	0	535	0	525	0	525	0	525	0	525	0
13.7814	0	525	0	525	0	525	0	525	0	530	0	525	0	530	0	525	0	525	0	525	0	525	0	530	0	530	0	525	0	525	0	520	0	525	0	525	0	525	0	535	0	525	0	525	0	525	0	525	0
13.7914	0	525	0	525	0	525	0	525	0	530	0	525	0	530	0	525	0	525	0	525	0	525	0	530	0	530	0	525	0	525	0	520	0	525	0	525	0	525	0	535	0	525	0	525	0	525	0	525	0
13.8014	0	525	0	525	0	525	0	525	0	530	0	525	0	530	0	525	0	525	0	525	0	525	0	530	0	530	0	525	0	525	0	520	0	525	0	525	0	525	0	535	0	525	0	525	0	525	0	525	0
13.8114	0	525	0	525	0	525	0	525	0	530	0	525	0	530	0	525	0	525	0	525	0	525	0	530	0	530	0	525	0	525	0	520	0	525	0	525	0	525	0	535	0	525	0	525	0	525	0	525	0
13.8215	0	525	0	525	0	525	0	525	0	530	0	525	0	530	0	525	0	525	0	525	0	525	0	530	0	530	0	525	0	525	0	520	0	525	0	525	0	525	0	535	0	525	0	525	0	525	0	525	0
13.8315	0	525	0	525	0	525	0	525	0	530	0	525	0	530	0	525	0	525	0	525	0	525	0	530	0	530	0	525	0	525	0	520	0	525	0	525	0	525	0	535	0	525	0	525	0	525	0	525	0
13.8415	0	525	0	525	0	525	0	525	0	530	0	525	0	530	0	525	0	525	0	525	0	525	0	530	0	530	0	525	0	525	0	520	0	525	0	525	0	525	0	535	0	525	0	525	0	525	0	525	0
13.8515	0	525	0	525	0	525	0	525	0	530	0	525	0	530	0	525	0	525	0	525	0	525	0	530	0	530	0	525	0	525	0	520	0	525	0	525	0	525	0	535	0	525	0	525	0	525	0	525	0
13.8615	0	525	0	525	0	525	0	525	0	530	0	525	0	530	0	525	0	525	0	525	0	525	0	530	0	530	0	525	0	525	0	520	0	525	0	525	0	525	0	535	0	525	0	525	0	525	0	525	0
13.8715	0	525	0	525	0	525	0	525	0	530	0	525	0	530	0	525	0	525	0	525	0	525	0	530	0	530	0	525	0	525	0	520	0	525	0	525	0	525	0	535	0	525	0	525	0	525	0	525	0
13.8815	0	525	0	525	0	525	0	525	0	530	0	525	0	530	0	525	0	525	0	525	0	525	0	530	0	530	0	525	0	525	0	520	0	525	0	525	0	525	0	535	0	525	0	525	0	525	0	525	0
13.8916	0	525	0	525	0	525	0	525	0	530	0	525	0	530	0	525	0	525	0	525	0	525	0	530	0	530	0	525	0	525	0	520	0	525	0	525	0	525	0	535	0	525	0	525	0	525	0	525	0
13.9016	0	525	0	525	0	525	0	525	0	530	0	525	0	530	0	525	0	525	0	525	0	525	0	530	0	530	0	525	0	525	0	520	0	525	0	525	0	525	0	535	0	525	0	525	0	525	0	525	0
13.9116	0	525	0	525	0	525	0	525	0	530	0	525	0	530	0	525	0	525	0	525	0	525	0	530	0	530	0	525	0	525	0	520	0	525	0	525	0	525	0	535	0	525	0	525	0	525	0	525	0
13.9216	0	525	0	525	0	525	0	525	0	530	0	525	0	530	0	525	0	525	0	525	0	525	0	530	0	530	0	525	0	525	0	520	0	525	0	525	0	525	0	535	0	525	0	525	0	525	0	525	0
13.9316	0	525	0	525	0	525	0	525	0	530	0	525	0	530	0	525	0	525	0	525	0	525	0	530	0	530	0	525	0	525	0	520	0	525	0	525	0	525	0	535	0	525	0	525	0	525	0	525	0
13.9416	0	525	0	525	0	525	0	525	0	530	0	525	0	530	0	525	0	525	0	525	0	525	0	530	0	530	0	525	0	525	0	520	0	525	0	525	0	525	0	535	0	525	0	525	0	525	0	525	0
13.9517	0	525	0	525	0	525	0	525	0	530	0	525	0	530	0	525	0	525	0	525	0	525	0	530	0	530	0	525	0	525	0	520	0	525	0	525	0	525	0	535	0	525	0	525	0	525	0	525	0
13.9617	0	525	0	525	0	525	0	525	0	530	0	525	0	530	0	525	0	525	0	525	0	525	0	530	0	530	0	525	0	525	0	520	0	525	0	525	0	525	0	535	0	525	0	525	0	525	0	525	0
13.9717	0	525	0	525	0	525	0	525	0	530	0	525	0	530	0	525	0	525	0	525	0	525	0	530	0	530	0	525	0	525	0	520	0	525	0	525	0	525	0	535	0	525	0	525	0	525	0	525	0
13.9817	0	525	0	525	0	525	0	525	0	530	0	525	0	530	0	525	0	525	0	525	0	525	0	530	0	530	0	525	0	525	0	520	0	525	0	525	0	525	0	535	0	525	0	525	0	525	0	525	0
13.9917	0	525	0	525	0	525	0	525	0	530	0	525	0	530	0	525	0	525	0	525	0	525	0	530	0	530	0	525	0	525	0	520	0	525	0	525	0	525	0	535	0	525	0	525	0	525	0	525	0
14.0017	0	525	0	525	0	525	0	525	0	530	0	525	0	530	0	525	0	525	0	525	0	525	0	530	0	530	0	525	0	525	0	520	0	525	0	525	0	525	0	535	0	525	0	525	0	525	0	525	0
14.0118	0	525	0	525	0	525	0	525	0	530	0	525	0	530	0	525	0	525	0	525	0	525	0	530	0	530	0	525	0	525	0	520	0	525	0	525	0	525	0	535	0	525	0	525	0	525	0	525	0
14.0218	0	525	0	525	0	525	0	525	0	530	0	525	0	530	0	525	0	525	0	525	0	525	0	530	0	530	0	525	0	525	0	520	0	525	0	525	0	525	0	535	0	525	0	525	0	525	0	525	0
14.0318	0	525	0	525	0	525	0	525	0	530	0	525	0	530	0	525	0	525	0	525	0	525	0	530	0	530	0	525	0	525	0	520	0	525	0	525	0	525	0	535	0	525	0	525	0	525	0	525	0
14.0418	0	525	0	525	0	525	0	525	0	530	0	525	0	530	0	525	0	525	0	525	0	525	0	530	0	530	0	525	0	525	0	520	0	525	0	525	0	525	0	535	0	525	0	525	0	525	0	525	0
14.0518	0	525	0	525	0	525	0	525	0	530	0	525	0	530	0	525	0	525	0	525	0	525	0	530	0	530	0	525	0	525	0	520	0	525	0	525	0	525	0	535	0	525	0	525	0	525	0	525	0
14.0618	0	525	0	525	0	525	0	525	0	530	0	525	0	530	0	525	0	525	0	525	0	525	0	530	0	530	0	525	0	525	0	520	0	525	0	525	0	525	0	535	0	525	0	525	0	525	0	525	0
14.0718	0	525	0	525	0	525	0	525	0	530	0	525	0	530	0	525	0	525	0	525	0	525	0	530	0	530	0	525	0	525	0	520	0	525	0	525	0	525	0	535	0	525	0	525	0	525	0	525	0
14.0819	0	525	0	525	0	525	0	525	0	530	0	525	0	530	0	525	0	525	0	525	0	525	0	530	0	530	0	525	0	525	0	520	0	525	0	525	0	525	0	535	0	525	0	525	0	525	0	525	0
14.0919	0	525	0	525	0	525	0	525	0	530	0	525	0	530	0	525	0	525	0	525	0	525	0	530	0	530	0	525	0	525	0	520	0	525	0	525	0	525	0	535	0	525	0	525	0	525	0	525	0
14.1019	0	525	0	525	0	525	0	525	0	530	0	525	0	530	0	525	0	525	0	525	0	525	0	530	0	530	0	525	0	525	0	520	0	525	0	525	0	525	0	535	0	525	0	525	0	525	0	525	0
14.1119	0	525	0	525	0	525	0	525	0	530	0	525	0	530	0	525	0	525	0	525	0	525	0	530	0	530	0	525	0	525	0	520	0	525	0	525	0	525	0	535	0	525	0	525	0	525	0	525	0
14.1219	0	525	0	525	0	525	0	525	0	530	0	525	0	530	0	525	0	525	0	525	0	525	0	530	0	530	0	525	0	525	0	520	0	525	0	525	0	525	0	535	0	525	0	525	0	525	0	525	0
14.1319	0	525	0	525	0	525	0	525	0	530	0	525	0	530	0	525	0	525	0	525	0	525	0	530	0	530	0	525	0	525	0	520	0	525	0	525	0	525	0	535	0	525	0	525	0	525	0	525	0
14.142	0	525	0	525	0	525	0	525	0	530	0	525	0	530	0	525	0	525	0	525	0	525	0	530	0	530	0	525	0	525	0	520	0	525	0	525	0	525	0	535	0	525	0	525	0	525	0	525	0
14.152	0	525	0	525	0	525	0	525	0	530	0	525	0	530	0	525	0	525	0	525	0	525	0	530	0	530	0	525	0	525	0	520	0	525	0	525	0	525	0	535	0	525	0	525	0	525	0	525	0
14.162	0	525	0	525	0	525	0	525	0	530	0	525	0	530	0	525	0	525	0	525	0	525	0	530	0	530	0	525	0	525	0	520	0	525	0	525	0	525	0	535	0	525	0	525	0	525	0	525	0
14.172	0	525	0	525	0	525	0	525	0	530	0	525	0	530	0	525	0	525	0	525	0	525	0	530	0	530	0	525	0	525	0	520	0	525	0	525	0	525	0	535	0	525	0	525	0	525	0	525	0
14.182	0	525	0	525	0	525	0	525	0	530	0	525	0	530	0	525	0	525	0	525	0	525	0	530	0	530	0	525	0	525	0	520	0	525	0	525	0	525	0	535	0	525	0	525	0	525	0	525	0
14.192	0	525	0	525	0	525	0	525	0	530	0	525	0	530	0	525	0	525	0	525	0	525	0	530	0	530	0	525	0	525	0	520	0	525	0	525	0	525	0	535	0	525	0	525	0	525	0	525	0
14.202	0	525	0	525	0	525	0	525	0	530	0	525	0	530	0	525	0	525	0	525	0	525	0	530	0	530	0	525	0	525	0	520	0	525	0	525	0	525	0	535	0	525	0	525	0	525	0	525	0
14.2121	0	525	0	525	0	525	0	525	0	530	0	525	0	530	0	525	0	525	0	525	0	525	0	530	0	530	0	525	0	525	0	520	0	525	0	525	0	525	0	535	0	525	0	525	0	525	0	525	0
14.2221	0	525	0	525	0	525	0	525	0	530	0	525	0	530	0	525	0	525	0	525	0	525	0	530	0	530	0	525	0	525	0	520	0	525	0	525	0	525	0	535	0	525	0	525	0	525	0	525	0
14.2321	0	525	0	525	0	525	0	525	0	530	0	525	0	530	0	525	0	525	0	525	0	525	0	530	0	530	0	525	0	525	0	520	0	525	0	525	0	525	0	535	0	525	0	525	0	525	0	525	0
14.2421	0	525	0	525	0	525	0	525	0	530	0	525	0	530	0	525	0	525	0	525	0	525	0	530	0	530	0	525	0	525	0	520	0	525	0	525	0	525	0	535	0	525	0	525	0	525	0	525	0
14.2521	0	525	0	525	0	525	0	525	0	530	0	525	0	530	0	525	0	525	0	525	0	525	0	530	0	530	0	525	0	525	0	520	0	525	0	525	0	525	0	535	0	525	0	525	0	525	0	525	0
14.2621	0	525	0	525	0	525	0	525	0	530	0	525	0	530	0	525	0	525	0	525	0	525	0	530	0	530	0	525	0	525	0	520	0	525	0	525	0	525	0	535	0	525	0	525	0	525	0	525	0
14.2722	0	525	0	525	0	525	0	525	0	530	0	525	0	530	0	525	0	525	0	525	0	525	0	530	0	530	0	525	0	525	0	520	0	525	0	525	0	525	0	535	0	525	0	525	0	525	0	525	0
14.2822	0	525	0	525	0	525	0	525	0	530	0	525	0	530	0	525	0	525	0	525	0	525	0	530	0	530	0	525	0	525	0	520	0	525	0	525	0	525	0	535	0	525	0	525	0	525	0	525	0
14.2922	0	525	0	525	0	525	0	525	0	530	0	525	0	530	0	525	0	525	0	525	0	525	0	530	0	530	0	525	0	525	0	520	0	525	0	525	0	525	0	535	0	525	0	525	0	525	0	525	0
14.3022	0	525	0	525	0	525	0	525	0	530	0	525	0	530	0	525	0	525	0	525	0	525	0	530	0	530	0	525	0	525	0	520	0	525	0	525	0	525	0	535	0	525	0	525	0	525	0	525	0
14.3122	0	525	0	525	0	525	0	525	0	530	0	525	0	530	0	525	0	525	0	525	0	525	0	530	0	530	0	525	0	525	0	520	0	525	0	525	0	525	0	535	0	525	0	525	0	525	0	525	0
14.3222	0	525	0	525	0	525	0	525	0	530	0	525	0	530	0	525	0	525	0	525	0	525	0	530	0	530	0	525	0	525	0	520	0	525	0	525	0	525	0	535	0	525	0	525	0	525	0	525	0
14.3322	0	525	0	525	0	525	0	525	0	530	0	525	0	530	0	525	0	525	0	525	0	525	0	530	0	530	0	525	0	525	0	520	0	525	0	525	0	525	0	535	0	525	0	525	0	525	0	525	0
14.3423	0	525	0	525	0	525	0	525	0	530	0	525	0	530	0	525	0	525	0	525	0	525	0	530	0	530	0	525	0	525	0	520	0	525	0	525	0	525	0	535	0	525	0	525	0	525	0	525	0
14.3523	0	525	0	525	0	525	0	525	0	530	0	525	0	530	0	525	0	525	0	525	0	525	0	530	0	530	0	525	0	525	0	520	0	525	0	525	0	525	0	535	0	525	0	525	0	525	0	525	0
14.3623	0	525	0	525	0	525	0	525	0	530	0	525	0	530	0	525	0	525	0	525	0	525	0	530	0	530	0	525	0	525	0	520	0	525	0	525	0	525	0	535	0	525	0	525	0	525	0	525	0
14.3723	0	525	0	525	0	525	0	525	0	530	0	525	0	530	0	525	0	525	0	525	0	525	0	530	0	530	0	525	0	525	0	520	0	525	0	525	0	525	0	535	0	525	0	525	0	525	0	525	0
14.3823	0	525	0	525	0	525	0	525	0	530	0	525	0	530	0	525	0	525	0	525	0	525	0	530	0	530	0	525	0	525	0	520	0	525	0	525	0	525	0	535	0	525	0	525	0	525	0	525	0
14.3923	0	525	0	525	0	525	0	525	0	530	0	525	0	530	0	525	0	525	0	525	0	525	0	530	0	530	0	525	0	525	0	520	0	525	0	525	0	525	0	535	0	525	0	525	0	525	0	525	0
14.4024	0	525	0	525	0	525	0	525	0	530	0	525	0	530	0	525	0	525	0	525	0	525	0	530	0	530	0	525	0	525	0	520	0	525	0	525	0	525	0	535	0	525	0	525	0	525	0	525	0
14.4124	0	525	0	525	0	525	0	525	0	530	0	525	0	530	0	525	0	525	0	525	0	525	0	530	0	530	0	525	0	525	0	520	0	525	0	525	0	525	0	535	0	525	0	525	0	525	0	525	0
14.4224	0	525	0	525	0	525	0	525	0	530	0	525	0	530	0	525	0	525	0	525	0	525	0	530	0	530	0	525	0	525	0	520	0	525	0	525	0	525	0	535	0	525	0	525	0	525	0	525	0
14.4324	0	525	0	525	0	525	0	525	0	530	0	525	0	530	0	525	0	525	0	525	0	525	0	530	0	530	0	525	0	525	0	520	0	525	0	525	0	525	0	535	0	525	0	525	0	525	0	525	0
14.4424	0	525	0	525	0	525	0	525	0	530	0	525	0	530	0	525	0	525	0	525	0	525	0	530	0	530	0	525	0	525	0	520	0	525	0	525	0	525	0	535	0	525	0	525	0	525	0	525	0
14.4524	0	525	0	525	0	525	0	525	0	530	0	525	0	530	0	525	0	525	0	525	0	525	0	530	0	530	0	525	0	525	0	520	0	525	0	525	0	525	0	535	0	525	0	525	0	525	0	525	0
14.4625	0	525	0	525	0	525	0	525	0	530	0	525	0	530	0	525	0	525	0	525	0	525	0	530	0	530	0	525	0	525	0	520	0	525	0	525	0	525	0	535	0	525	0	525	0	525	0	525	0
14.4725	0	525	0	525	0	525	0	525	0	530	0	525	0	530	0	525	0	525	0	525	0	525	0	530	0	530	0	525	0	525	0	520	0	525	0	525	0	525	0	535	0	525	0	525	0	525	0	525	0
14.4825	0	525	0	525	0	525	0	525	0	530	0	525	0	530	0	525	0	525	0	525	0	525	0	530	0	530	0	525	0	525	0	520	0	525	0	525	0	525	0	535	0	525	0	525	0	525	0	525	0
14.4925	0	525	0	525	0	525	0	525	0	530	0	525	0	530	0	525	0	525	0	525	0	525	0	530	0	530	0	525	0	525	0	520	0	525	0	525	0	525	0	535	0	525	0	525	0	525	0	525	0
14.5025	0	525	0	525	0	525	0	525	0	530	0	525	0	530	0	525	0	525	0	525	0	525	0	530	0	530	0	525	0	525	0	520	0	525	0	525	0	525	0	535	0	525	0	525	0	525	0	525	0
14.5125	0	525	0	525	0	525	0	525	0	530	0	525	0	530	0	525	0	525	0	525	0	525	0	530	0	530	0	525	0	525	0	520	0	525	0	525	0	525	0	535	0	525	0	525	0	525	0	525	0
14.5225	0	525	0	525	0	525	0	525	0	530	0	525	0	530	0	525	0	525	0	525	0	525	0	530	0	530	0	525	0	525	0	520	0	525	0	525	0	525	0	535	0	525	0	525	0	525	0	525	0
14.5326	0	525	0	525	0	525	0	525	0	530	0	525	0	530	0	525	0	525	0	525	0	525	0	530	0	530	0	525	0	525	0	520	0	525	0	525	0	525	0	535	0	525	0	525	0	525	0	525	0
14.5426	0	525	0	525	0	525	0	525	0	530	0	525	0	530	0	525	0	525	0	525	0	525	0	530	0	530	0	525	0	525	0	520	0	525	0	525	0	525	0	535	0	525	0	525	0	525	0	525	0
14.5526	0	525	0	525	0	525	0	525	0	530	0	525	0	530	0	525	0	525	0	525	0	525	0	530	0	530	0	525	0	525	0	520	0	525	0	525	0	525	0	535	0	525	0	525	0	525	0	525	0
14.5626	0	525	0	525	0	525	0	525	0	530	0	525	0	530	0	525	0	525	0	525	0	525	0	530	0	530	0	525	0	525	0	520	0	525	0	525	0	525	0	535	0	525	0	525	0	525	0	525	0
14.5726	0	525	0	525	0	525	0	525	0	530	0	525	0	530	0	525	0	525	0	525	0	525	0	530	0	530	0	525	0	525	0	520	0	525	0	525	0	525	0	535	0	525	0	525	0	525	0	525	0
14.5826	0	525	0	525	0	525	0	525	0	530	0	525	0	530	0	525	0	525	0	525	0	525	0	530	0	530	0	525	0	525	0	520	0	525	0	525	0	525	0	535	0	525	0	525	0	525	0	525	0
14.5927	0	525	0	525	0	525	0	525	0	530	0	525	0	530	0	525	0	525	0	525	0	525	0	530	0	530	0	525	0	525	0	520	0	525	0	525	0	525	0	535	0	525	0	525	0	525	0	525	0
14.6027	0	525	0	525	0	525	0	525	0	530	0	525	0	530	0	525	0	525	0	525	0	525	0	530	0	530	0	525	0	525	0	520	0	525	0	525	0	525	0	535	0	525	0	525	0	525	0	525	0
14.6127	0	525	0	525	0	525	0	525	0	530	0	525	0	530	0	525	0	525	0	525	0	525	0	530	0	530	0	525	0	525	0	520	0	525	0	525	0	525	0	535	0	525	0	525	0	525	0	525	0
14.6227	0	525	0	525	0	525	0	525	0	530	0	525	0	530	0	525	0	525	0	525	0	525	0	530	0	530	0	525	0	525	0	520	0	525	0	525	0	525	0	535	0	525	0	525	0	525	0	525	0
14.6327	0	525	0	525	0	525	0	525	0	530	0	525	0	530	0	525	0	525	0	525	0	525	0	530	0	530	0	525	0	525	0	520	0	525	0	525	0	525	0	535	0	525	0	525	0	525	0	525	0
14.6427	0	525	0	525	0	525	0	525	0	530	0	525	0	530	0	525	0	525	0	525	0	525	0	530	0	530	0	525	0	525	0	520	0	525	0	525	0	525	0	535	0	525	0	525	0	525	0	525	0
14.6527	0	525	0	525	0	525	0	525	0	530	0	525	0	530	0	525	0	525	0	525	0	525	0	530	0	530	0	525	0	525	0	520	0	525	0	525	0	525	0	535	0	525	0	525	0	525	0	525	0
14.6628	0	525	0	525	0	525	0	525	0	530	0	525	0	530	0	525	0	525	0	525	0	525	0	530	0	530	0	525	0	525	0	520	0	525	0	525	0	525	0	535	0	525	0	525	0	525	0	525	0
14.6728	0	525	0	525	0	525	0	525	0	530	0	525	0	530	0	525	0	525	0	525	0	525	0	530	0	530	0	525	0	525	0	520	0	525	0	525	0	525	0	535	0	525	0	525	0	525	0	525	0
14.6828	0	525	0	525	0	525	0	525	0	530	0	525	0	530	0	525	0	525	0	525	0	525	0	530	0	530	0	525	0	525	0	520	0	525	0	525	0	525	0	535	0	525	0	525	0	525	0	525	0
14.6928	0	525	0	525	0	525	0	525	0	530	0	525	0	530	0	525	0	525	0	525	0	525	0	530	0	530	0	525	0	525	0	520	0	525	0	525	0	525	0	535	0	525	0	525	0	525	0	525	0
14.7028	0	525	0	525	0	525	0	525	0	530	0	525	0	530	0	525	0	525	0	525	0	525	0	530	0	530	0	525	0	525	0	520	0	525	0	525	0	525	0	535	0	525	0	525	0	525	0	525	0
14.7128	0	525	0	525	0	525	0	525	0	530	0	525	0	530	0	525	0	525	0	525	0	525	0	530	0	530	0	525	0	525	0	520	0	525	0	525	0	525	0	535	0	525	0	525	0	525	0	525	0
14.7229	0	525	0	525	0	525	0	525	0	530	0	525	0	530	0	525	0	525	0	525	0	525	0	530	0	530	0	525	0	525	0	520	0	525	0	525	0	525	0	535	0	525	0	525	0	525	0	525	0
14.7329	0	525	0	525	0	525	0	525	0	530	0	525	0	530	0	525	0	525	0	525	0	525	0	530	0	530	0	525	0	525	0	520	0	525	0	525	0	525	0	535	0	525	0	525	0	525	0	525	0
14.7429	0	525	0	525	0	525	0	525	0	530	0	525	0	530	0	525	0	525	0	525	0	525	0	530	0	530	0	525	0	525	0	520	0	525	0	525	0	525	0	535	0	525	0	525	0	525	0	525	0
14.7529	0	525	0	525	0	525	0	525	0	530	0	525	0	530	0	525	0	525	0	525	0	525	0	530	0	530	0	525	0	525	0	520	0	525	0	525	0	525	0	535	0	525	0	525	0	525	0	525	0
14.7629	0	525	0	525	0	525	0	525	0	530	0	525	0	530	0	525	0	525	0	525	0	525	0	530	0	530	0	525	0	525	0	520	0	525	0	525	0	525	0	535	0	525	0	525	0	525	0	525	0
14.7729	0	525	0	525	0	525	0	525	0	530	0	525	0	530	0	525	0	525	0	525	0	525	0	530	0	530	0	525	0	525	0	520	0	525	0	525	0	525	0	535	0	525	0	525	0	525	0	525	0
14.7829	0	525	0	525	0	525	0	525	0	530	0	525	0	530	0	525	0	525	0	525	0	525	0	530	0	530	0	525	0	525	0	520	0	525	0	525	0	525	0	535	0	525	0	525	0	525	0	525	0
14.793	0	525	0	525	0	525	0	525	0	530	0	525	0	530	0	525	0	525	0	525	0	525	0	530	0	530	0	525	0	525	0	520	0	525	0	525	0	525	0	535	0	525	0	525	0	525	0	525	0
14.803	0	525	0	525	0	525	0	525	0	530	0	525	0	530	0	525	0	525	0	525	0	525	0	530	0	530	0	525	0	525	0	520	0	525	0	525	0	525	0	535	0	525	0	525	0	525	0	525	0
14.813	0	525	0	525	0	525	0	525	0	530	0	525	0	530	0	525	0	525	0	525	0	525	0	530	0	530	0	525	0	525	0	520	0	525	0	525	0	525	0	535	0	525	0	525	0	525	0	525	0
14.823	0	525	0	525	0	525	0	525	0	530	0	525	0	530	0	525	0	525	0	525	0	525	0	530	0	530	0	525	0	525	0	520	0	525	0	525	0	525	0	535	0	525	0	525	0	525	0	525	0
14.833	0	525	0	525	0	525	0	525	0	530	0	525	0	530	0	525	0	525	0	525	0	525	0	530	0	530	0	525	0	525	0	520	0	525	0	525	0	525	0	535	0	525	0	525	0	525	0	525	0
14.843	0	525	0	525	0	525	0	525	0	530	0	525	0	530	0	525	0	525	0	525	0	525	0	530	0	530	0	525	0	525	0	520	0	525	0	525	0	525	0	535	0	525	0	525	0	525	0	525	0
14.8531	0	525	0	525	0	525	0	525	0	530	0	525	0	530	0	525	0	525	0	525	0	525	0	530	0	530	0	525	0	525	0	520	0	525	0	525	0	525	0	535	0	525	0	525	0	525	0	525	0
14.8631	0	525	0	525	0	525	0	525	0	530	0	525	0	530	0	525	0	525	0	525	0	525	0	530	0	530	0	525	0	525	0	520	0	525	0	525	0	525	0	535	0	525	0	525	0	525	0	525	0
14.8731	0	525	0	525	0	525	0	525	0	530	0	525	0	530	0	525	0	525	0	525	0	525	0	530	0	530	0	525	0	525	0	520	0	525	0	525	0	525	0	535	0	525	0	525	0	525	0	525	0
14.8831	0	525	0	525	0	525	0	525	0	530	0	525	0	530	0	525	0	525	0	525	0	525	0	530	0	530	0	525	0	525	0	520	0	525	0	525	0	525	0	535	0	525	0	525	0	525	0	525	0
14.8931	0	525	0	525	0	525	0	525	0	530	0	525	0	530	0	525	0	525	0	525	0	525	0	530	0	530	0	525	0	525	0	520	0	525	0	525	0	525	0	535	0	525	0	525	0	525	0	525	0
14.9031	0	525	0	525	0	525	0	525	0	530	0	525	0	530	0	525	0	525	0	525	0	525	0	530	0	530	0	525	0	525	0	520	0	525	0	525	0	525	0	535	0	525	0	525	0	525	0	525	0
14.9132	0	525	0	525	0	525	0	525	0	530	0	525	0	530	0	525	0	525	0	525	0	525	0	530	0	530	0	525	0	525	0	520	0	525	0	525	0	525	0	535	0	525	0	525	0	525	0	525	0
14.9232	0	525	0	525	0	525	0	525	0	530	0	525	0	530	0	525	0	525	0	525	0	525	0	530	0	530	0	525	0	525	0	520	0	525	0	525	0	525	0	535	0	525	0	525	0	525	0	525	0
14.9332	0	525	0	525	0	525	0	525	0	530	0	525	0	530	0	525	0	525	0	525	0	525	0	530	0	530	0	525	0	525	0	520	0	525	0	525	0	525	0	535	0	525	0	525	0	525	0	525	0
14.9432	0	525	0	525	0	525	0	525	0	530	0	525	0	530	0	525	0	525	0	525	0	525	0	530	0	530	0	525	0	525	0	520	0	525	0	525	0	525	0	535	0	525	0	525	0	525	0	525	0
14.9532	0	525	0	525	0	525	0	525	0	530	0	525	0	530	0	525	0	525	0	525	0	525	0	530	0	530	0	525	0	525	0	520	0	525	0	525	0	525	0	535	0	525	0	525	0	525	0	525	0
14.9632	0	525	0	525	0	525	0	525	0	530	0	525	0	530	0	525	0	525	0	525	0	525	0	530	0	530	0	525	0	525	0	520	0	525	0	525	0	525	0	535	0	525	0	525	0	525	0	525	0
14.9732	0	525	0	525	0	525	0	525	0	530	0	525	0	530	0	525	0	525	0	525	0	525	0	530	0	530	0	525	0	525	0	520	0	525	0	525	0	525	0	535	0	525	0	525	0	525	0	525	0
14.9833	0	525	0	525	0	525	0	525	0	530	0	525	0	530	0	525	0	525	0	525	0	525	0	530	0	530	0	525	0	525	0	520	0	525	0	525	0	525	0	535	0	525	0	525	0	525	0	525	0
14.9933	0	525	0	525	0	525	0	525	0	530	0	525	0	530	0	525	0	525	0	525	0	525	0	530	0	530	0	525	0	525	0	520	0	525	0	525	0	525	0	535	0	525	0	525	0	525	0	525	0
15.0033	0	525	0	525	0	525	0	525	0	530	0	525	0	530	0	525	0	525	0	525	0	525	0	530	0	530	0	525	0	525	0	520	0	525	0	525	0	525	0	535	0	525	0	525	0	525	0	525	0
15.0133	0	525	0	525	0	525	0	525	0	530	0	525	0	530	0	525	0	525	0	525	0	525	0	530	0	530	0	525	0	525	0	520	0	525	0	525	0	525	0	535	0	525	0	525	0	525	0	525	0
15.0233	0	525	0	525	0	525	0	525	0	530	0	525	0	530	0	525	0	525	0	525	0	525	0	530	0	530	0	525	0	525	0	520	0	525	0	525	0	525	0	535	0	525	0	525	0	525	0	525	0
15.0333	0	525	0	525	0	525	0	525	0	530	0	525	0	530	0	525	0	525	0	525	0	525	0	530	0	530	0	525	0	525	0	520	0	525	0	525	0	525	0	535	0	525	0	525	0	525	0	525	0
15.0434	0	525	0	525	0	525	0	525	0	530	0	525	0	530	0	525	0	525	0	525	0	525	0	530	0	530	0	525	0	525	0	520	0	525	0	525	0	525	0	535	0	525	0	525	0	525	0	525	0
15.0534	0	525	0	525	0	525	0	525	0	530	0	525	0	530	0	525	0	525	0	525	0	525	0	530	0	530	0	525	0	525	0	520	0	525	0	525	0	525	0	535	0	525	0	525	0	525	0	525	0
15.0634	0	525	0	525	0	525	0	525	0	530	0	525	0	530	0	525	0	525	0	525	0	525	0	530	0	530	0	525	0	525	0	520	0	525	0	525	0	525	0	535	0	525	0	525	0	525	0	525	0
15.0734	0	525	0	525	0	525	0	525	0	530	0	525	0	530	0	525	0	525	0	525	0	525	0	530	0	530	0	525	0	525	0	520	0	525	0	525	0	525	0	535	0	525	0	525	0	525	0	525	0
15.0834	0	525	0	525	0	525	0	525	0	530	0	525	0	530	0	525	0	525	0	525	0	525	0	530	0	530	0	525	0	525	0	520	0	525	0	525	0	525	0	535	0	525	0	525	0	525	0	525	0
15.0934	0	525	0	525	0	525	0	525	0	530	0	525	0	530	0	525	0	525	0	525	0	525	0	530	0	530	0	525	0	525	0	520	0	525	0	525	0	525	0	535	0	525	0	525	0	525	0	525	0
15.1034	0	525	0	525	0	525	0	525	0	530	0	525	0	530	0	525	0	525	0	525	0	525	0	530	0	530	0	525	0	525	0	520	0	525	0	525	0	525	0	535	0	525	0	525	0	525	0	525	0
15.1135	0	525	0	525	0	525	0	525	0	530	0	525	0	530	0	525	0	525	0	525	0	525	0	530	0	530	0	525	0	525	0	520	0	525	0	525	0	525	0	535	0	525	0	525	0	525	0	525	0
15.1235	0	525	0	525	0	525	0	525	0	530	0	525	0	530	0	525	0	525	0	525	0	525	0	530	0	530	0	525	0	525	0	520	0	525	0	525	0	525	0	535	0	525	0	525	0	525	0	525	0
15.1335	0	525	0	525	0	525	0	525	0	530	0	525	0	530	0	525	0	525	0	525	0	525	0	530	0	530	0	525	0	525	0	520	0	525	0	525	0	525	0	535	0	525	0	525	0	525	0	525	0
15.1435	0	525	0	525	0	525	0	525	0	530	0	525	0	530	0	525	0	525	0	525	0	525	0	530	0	530	0	525	0	525	0	520	0	525	0	525	0	525	0	535	0	525	0	525	0	525	0	525	0
15.1535	0	525	0	525	0	525	0	525	0	530	0	525	0	530	0	525	0	525	0	525	0	525	0	530	0	530	0	525	0	525	0	520	0	525	0	525	0	525	0	535	0	525	0	525	0	525	0	525	0
15.1635	0	525	0	525	0	525	0	525	0	530	0	525	0	530	0	525	0	525	0	525	0	525	0	530	0	530	0	525	0	525	0	520	0	525	0	525	0	525	0	535	0	525	0	525	0	525	0	525	0
15.1736	0	525	0	525	0	525	0	525	0	530	0	525	0	530	0	525	0	525	0	525	0	525	0	530	0	530	0	525	0	525	0	520	0	525	0	525	0	525	0	535	0	525	0	525	0	525	0	525	0
15.1836	0	525	0	525	0	525	0	525	0	530	0	525	0	530	0	525	0	525	0	525	0	525	0	530	0	530	0	525	0	525	0	520	0	525	0	525	0	525	0	535	0	525	0	525	0	525	0	525	0
15.1936	0	525	0	525	0	525	0	525	0	530	0	525	0	530	0	525	0	525	0	525	0	525	0	530	0	530	0	525	0	525	0	520	0	525	0	525	0	525	0	535	0	525	0	525	0	525	0	525	0
15.2036	0	525	0	525	0	525	0	525	0	530	0	525	0	530	0	525	0	525	0	525	0	525	0	530	0	530	0	525	0	525	0	520	0	525	0	525	0	525	0	535	0	525	0	525	0	525	0	525	0
15.2136	0	525	0	525	0	525	0	525	0	530	0	525	0	530	0	525	0	525	0	525	0	525	0	530	0	530	0	525	0	525	0	520	0	525	0	525	0	525	0	535	0	525	0	525	0	525	0	525	0
15.2236	0	525	0	525	0	525	0	525	0	530	0	525	0	530	0	525	0	525	0	525	0	525	0	530	0	530	0	525	0	525	0	520	0	525	0	525	0	525	0	535	0	525	0	525	0	525	0	525	0
15.2336	0	525	0	525	0	525	0	525	0	530	0	525	0	530	0	525	0	525	0	525	0	525	0	530	0	530	0	525	0	525	0	520	0	525	0	525	0	525	0	535	0	525	0	525	0	525	0	525	0
15.2437	0	525	0	525	0	525	0	525	0	530	0	525	0	530	0	525	0	525	0	525	0	525	0	530	0	530	0	525	0	525	0	520	0	525	0	525	0	525	0	535	0	525	0	525	0	525	0	525	0
15.2537	0	525	0	525	0	525	0	525	0	530	0	525	0	530	0	525	0	525	0	525	0	525	0	530	0	530	0	525	0	525	0	520	0	525	0	525	0	525	0	535	0	525	0	525	0	525	0	525	0
15.2637	0	525	0	525	0	525	0	525	0	530	0	525	0	530	0	525	0	525	0	525	0	525	0	530	0	530	0	525	0	525	0	520	0	525	0	525	0	525	0	535	0	525	0	525	0	525	0	525	0
15.2737	0	525	0	525	0	525	0	525	0	530	0	525	0	530	0	525	0	525	0	525	0	525	0	530	0	530	0	525	0	525	0	520	0	525	0	525	0	525	0	535	0	525	0	525	0	525	0	525	0
15.2837	0	525	0	525	0	525	0	525	0	530	0	525	0	530	0	525	0	525	0	525	0	525	0	530	0	530	0	525	0	525	0	520	0	525	0	525	0	525	0	535	0	525	0	525	0	525	0	525	0
15.2937	0	525	0	525	0	525	0	525	0	530	0	525	0	530	0	525	0	525	0	525	0	525	0	530	0	530	0	525	0	525	0	520	0	525	0	525	0	525	0	535	0	525	0	525	0	525	0	525	0
15.3038	0	525	0	525	0	525	0	525	0	530	0	525	0	530	0	525	0	525	0	525	0	525	0	530	0	530	0	525	0	525	0	520	0	525	0	525	0	525	0	535	0	525	0	525	0	525	0	525	0
15.3138	0	525	0	525	0	525	0	525	0	530	0	525	0	530	0	525	0	525	0	525	0	525	0	530	0	530	0	525	0	525	0	520	0	525	0	525	0	525	0	535	0	525	0	525	0	525	0	525	0
15.3238	0	525	0	525	0	525	0	525	0	530	0	525	0	530	0	525	0	525	0	525	0	525	0	530	0	530	0	525	0	525	0	520	0	525	0	525	0	525	0	535	0	525	0	525	0	525	0	525	0
15.3338	0	525	0	525	0	525	0	525	0	530	0	525	0	530	0	525	0	525	0	525	0	525	0	530	0	530	0	525	0	525	0	520	0	525	0	525	0	525	0	535	0	525	0	525	0	525	0	525	0
15.3438	0	525	0	525	0	525	0	525	0	530	0	525	0	530	0	525	0	525	0	525	0	525	0	530	0	530	0	525	0	525	0	520	0	525	0	525	0	525	0	535	0	525	0	525	0	525	0	525	0
15.3538	0	525	0	525	0	525	0	525	0	530	0	525	0	530	0	525	0	525	0	525	0	525	0	530	0	530	0	525	0	525	0	520	0	525	0	525	0	525	0	535	0	525	0	525	0	525	0	525	0
15.3639	0	525	0	525	0	525	0	525	0	530	0	525	0	530	0	525	0	525	0	525	0	525	0	530	0	530	0	525	0	525	0	520	0	525	0	525	0	525	0	535	0	525	0	525	0	525	0	525	0
15.3739	0	525	0	525	0	525	0	525	0	530	0	525	0	530	0	525	0	525	0	525	0	525	0	530	0	530	0	525	0	525	0	520	0	525	0	525	0	525	0	535	0	525	0	525	0	525	0	525	0
15.3839	0	525	0	525	0	525	0	525	0	530	0	525	0	530	0	525	0	525	0	525	0	525	0	530	0	530	0	525	0	525	0	520	0	525	0	525	0	525	0	535	0	525	0	525	0	525	0	525	0
15.3939	0	525	0	525	0	525	0	525	0	530	0	525	0	530	0	525	0	525	0	525	0	525	0	530	0	530	0	525	0	525	0	520	0	525	0	525	0	525	0	535	0	525	0	525	0	525	0	525	0
15.4039	0	525	0	525	0	525	0	525	0	530	0	525	0	530	0	525	0	525	0	525	0	525	0	530	0	530	0	525	0	525	0	520	0	525	0	525	0	525	0	535	0	525	0	525	0	525	0	525	0
15.4139	0	525	0	525	0	525	0	525	0	530	0	525	0	530	0	525	0	525	0	525	0	525	0	530	0	530	0	525	0	525	0	520	0	525	0	525	0	525	0	535	0	525	0	525	0	525	0	525	0
15.4239	0	525	0	525	0	525	0	525	0	530	0	525	0	530	0	525	0	525	0	525	0	525	0	530	0	530	0	525	0	525	0	520	0	525	0	525	0	525	0	535	0	525	0	525	0	525	0	525	0
15.434	0	525	0	525	0	525	0	525	0	530	0	525	0	530	0	525	0	525	0	525	0	525	0	530	0	530	0	525	0	525	0	520	0	525	0	525	0	525	0	535	0	525	0	525	0	525	0	525	0
15.444	0	525	0	525	0	525	0	525	0	530	0	525	0	530	0	525	0	525	0	525	0	525	0	530	0	530	0	525	0	525	0	520	0	525	0	525	0	525	0	535	0	525	0	525	0	525	0	525	0
15.454	0	525	0	525	0	525	0	525	0	530	0	525	0	530	0	525	0	525	0	525	0	525	0	530	0	530	0	525	0	525	0	520	0	525	0	525	0	525	0	535	0	525	0	525	0	525	0	525	0
15.464	0	525	0	525	0	525	0	525	0	530	0	525	0	530	0	525	0	525	0	525	0	525	0	530	0	530	0	525	0	525	0	520	0	525	0	525	0	525	0	535	0	525	0	525	0	525	0	525	0
15.474	0	525	0	525	0	525	0	525	0	530	0	525	0	530	0	525	0	525	0	525	0	525	0	530	0	530	0	525	0	525	0	520	0	525	0	525	0	525	0	535	0	525	0	525	0	525	0	525	0
15.484	0	525	0	525	0	525	0	525	0	530	0	525	0	530	0	525	0	525	0	525	0	525	0	530	0	530	0	525	0	525	0	520	0	525	0	525	0	525	0	535	0	525	0	525	0	525	0	525	0
15.4941	0	525	0	525	0	525	0	525	0	530	0	525	0	530	0	525	0	525	0	525	0	525	0	530	0	530	0	525	0	525	0	520	0	525	0	525	0	525	0	535	0	525	0	525	0	525	0	525	0
15.5041	0	525	0	525	0	525	0	525	0	530	0	525	0	530	0	525	0	525	0	525	0	525	0	530	0	530	0	525	0	525	0	520	0	525	0	525	0	525	0	535	0	525	0	525	0	525	0	525	0
15.5141	0	525	0	525	0	525	0	525	0	530	0	525	0	530	0	525	0	525	0	525	0	525	0	530	0	530	0	525	0	525	0	520	0	525	0	525	0	525	0	535	0	525	0	525	0	525	0	525	0
15.5241	0	525	0	525	0	525	0	525	0	530	0	525	0	530	0	525	0	525	0	525	0	525	0	530	0	530	0	525	0	525	0	520	0	525	0	525	0	525	0	535	0	525	0	525	0	525	0	525	0
15.5341	0	525	0	525	0	525	0	525	0	530	0	525	0	530	0	525	0	525	0	525	0	525	0	530	0	530	0	525	0	525	0	520	0	525	0	525	0	525	0	535	0	525	0	525	0	525	0	525	0
15.5441	0	525	0	525	0	525	0	525	0	530	0	525	0	530	0	525	0	525	0	525	0	525	0	530	0	530	0	525	0	525	0	520	0	525	0	525	0	525	0	535	0	525	0	525	0	525	0	525	0
15.5541	0	525	0	525	0	525	0	525	0	530	0	525	0	530	0	525	0	525	0	525	0	525	0	530	0	530	0	525	0	525	0	520	0	525	0	525	0	525	0	535	0	525	0	525	0	525	0	525	0
15.5642	0	525	0	525	0	525	0	525	0	530	0	525	0	530	0	525	0	525	0	525	0	525	0	530	0	530	0	525	0	525	0	520	0	525	0	525	0	525	0	535	0	525	0	525	0	525	0	525	0
15.5742	0	525	0	525	0	525	0	525	0	530	0	525	0	530	0	525	0	525	0	525	0	525	0	530	0	530	0	525	0	525	0	520	0	525	0	525	0	525	0	535	0	525	0	525	0	525	0	525	0
15.5842	0	525	0	525	0	525	0	525	0	530	0	525	0	530	0	525	0	525	0	525	0	525	0	530	0	530	0	525	0	525	0	520	0	525	0	525	0	525	0	535	0	525	0	525	0	525	0	525	0
15.5942	0	525	0	525	0	525	0	525	0	530	0	525	0	530	0	525	0	525	0	525	0	525	0	530	0	530	0	525	0	525	0	520	0	525	0	525	0	525	0	535	0	525	0	525	0	525	0	525	0
15.6042	0	525	0	525	0	525	0	525	0	530	0	525	0	530	0	525	0	525	0	525	0	525	0	530	0	530	0	525	0	525	0	520	0	525	0	525	0	525	0	535	0	525	0	525	0	525	0	525	0
15.6142	0	525	0	525	0	525	0	525	0	530	0	525	0	530	0	525	0	525	0	525	0	525	0	530	0	530	0	525	0	525	0	520	0	525	0	525	0	525	0	535	0	525	0	525	0	525	0	525	0
15.6243	0	525	0	525	0	525	0	525	0	530	0	525	0	530	0	525	0	525	0	525	0	525	0	530	0	530	0	525	0	525	0	520	0	525	0	525	0	525	0	535	0	525	0	525	0	525	0	525	0
15.6343	0	525	0	525	0	525	0	525	0	530	0	525	0	530	0	525	0	525	0	525	0	525	0	530	0	530	0	525	0	525	0	520	0	525	0	525	0	525	0	535	0	525	0	525	0	525	0	525	0
15.6443	0	525	0	525	0	525	0	525	0	530	0	525	0	530	0	525	0	525	0	525	0	525	0	530	0	530	0	525	0	525	0	520	0	525	0	525	0	525	0	535	0	525	0	525	0	525	0	525	0
15.6543	0	525	0	525	0	525	0	525	0	530	0	525	0	530	0	525	0	525	0	525	0	525	0	530	0	530	0	525	0	525	0	520	0	525	0	525	0	525	0	535	0	525	0	525	0	525	0	525	0
15.6643	0	525	0	525	0	525	0	525	0	530	0	525	0	530	0	525	0	525	0	525	0	525	0	530	0	530	0	525	0	525	0	520	0	525	0	525	0	525	0	535	0	525	0	525	0	525	0	525	0
15.6743	0	525	0	525	0	525	0	525	0	530	0	525	0	530	0	525	0	525	0	525	0	525	0	530	0	530	0	525	0	525	0	520	0	525	0	525	0	525	0	535	0	525	0	525	0	525	0	525	0
15.6843	0	525	0	525	0	525	0	525	0	530	0	525	0	530	0	525	0	525	0	525	0	525	0	530	0	530	0	525	0	525	0	520	0	525	0	525	0	525	0	535	0	525	0	525	0	525	0	525	0
15.6944	0	525	0	525	0	525	0	525	0	530	0	525	0	530	0	525	0	525	0	525	0	525	0	530	0	530	0	525	0	525	0	520	0	525	0	525	0	525	0	535	0	525	0	525	0	525	0	525	0
15.7044	0	525	0	525	0	525	0	525	0	530	0	525	0	530	0	525	0	525	0	525	0	525	0	530	0	530	0	525	0	525	0	520	0	525	0	525	0	525	0	535	0	525	0	525	0	525	0	525	0
15.7144	0	525	0	525	0	525	0	525	0	530	0	525	0	530	0	525	0	525	0	525	0	525	0	530	0	530	0	525	0	525	0	520	0	525	0	525	0	525	0	535	0	525	0	525	0	525	0	525	0
15.7244	0	525	0	525	0	525	0	525	0	530	0	525	0	530	0	525	0	525	0	525	0	525	0	530	0	530	0	525	0	525	0	520	0	525	0	525	0	525	0	535	0	525	0	525	0	525	0	525	0
15.7344	0	525	0	525	0	525	0	525	0	530	0	525	0	530	0	525	0	525	0	525	0	525	0	530	0	530	0	525	0	525	0	520	0	525	0	525	0	525	0	535	0	525	0	525	0	525	0	525	0
15.7444	0	525	0	525	0	525	0	525	0	530	0	525	0	530	0	525	0	525	0	525	0	525	0	530	0	530	0	525	0	525	0	520	0	525	0	525	0	525	0	535	0	525	0	525	0	525	0	525	0
15.7545	0	525	0	525	0	525	0	525	0	530	0	525	0	530	0	525	0	525	0	525	0	525	0	530	0	530	0	525	0	525	0	520	0	525	0	525	0	525	0	535	0	525	0	525	0	525	0	525	0
15.7645	0	525	0	525	0	525	0	525	0	530	0	525	0	530	0	525	0	525	0	525	0	525	0	530	0	530	0	525	0	525	0	520	0	525	0	525	0	525	0	535	0	525	0	525	0	525	0	525	0
15.7745	0	525	0	525	0	525	0	525	0	530	0	525	0	530	0	525	0	525	0	525	0	525	0	530	0	530	0	525	0	525	0	520	0	525	0	525	0	525	0	535	0	525	0	525	0	525	0	525	0
15.7845	0	525	0	525	0	525	0	525	0	530	0	525	0	530	0	525	0	525	0	525	0	525	0	530	0	530	0	525	0	525	0	520	0	525	0	525	0	525	0	535	0	525	0	525	0	525	0	525	0
15.7945	0	525	0	525	0	525	0	525	0	530	0	525	0	530	0	525	0	525	0	525	0	525	0	530	0	530	0	525	0	525	0	520	0	525	0	525	0	525	0	535	0	525	0	525	0	525	0	525	0
15.8045	0	525	0	525	0	525	0	525	0	530	0	525	0	530	0	525	0	525	0	525	0	525	0	530	0	530	0	525	0	525	0	520	0	525	0	525	0	525	0	535	0	525	0	525	0	525	0	525	0
15.8145	0	525	0	525	0	525	0	525	0	530	0	525	0	530	0	525	0	525	0	525	0	525	0	530	0	530	0	525	0	525	0	520	0	525	0	525	0	525	0	535	0	525	0	525	0	525	0	525	0
15.8246	0	525	0	525	0	525	0	525	0	530	0	525	0	530	0	525	0	525	0	525	0	525	0	530	0	530	0	525	0	525	0	520	0	525	0	525	0	525	0	535	0	525	0	525	0	525	0	525	0
15.8346	0	525	0	525	0	525	0	525	0	530	0	525	0	530	0	525	0	525	0	525	0	525	0	530	0	530	0	525	0	525	0	520	0	525	0	525	0	525	0	535	0	525	0	525	0	525	0	525	0
15.8446	0	525	0	525	0	525	0	525	0	530	0	525	0	530	0	525	0	525	0	525	0	525	0	530	0	530	0	525	0	525	0	520	0	525	0	525	0	525	0	535	0	525	0	525	0	525	0	525	0
15.8546	0	525	0	525	0	525	0	525	0	530	0	525	0	530	0	525	0	525	0	525	0	525	0	530	0	530	0	525	0	525	0	520	0	525	0	525	0	525	0	535	0	525	0	525	0	525	0	525	0
15.8646	0	525	0	525	0	525	0	525	0	530	0	525	0	530	0	525	0	525	0	525	0	525	0	530	0	530	0	525	0	525	0	520	0	525	0	525	0	525	0	535	0	525	0	525	0	525	0	525	0
15.8746	0	525	0	525	0	525	0	525	0	530	0	525	0	530	0	525	0	525	0	525	0	525	0	530	0	530	0	525	0	525	0	520	0	525	0	525	0	525	0	535	0	525	0	525	0	525	0	525	0
15.8847	0	525	0	525	0	525	0	525	0	530	0	525	0	530	0	525	0	525	0	525	0	525	0	530	0	530	0	525	0	525	0	520	0	525	0	525	0	525	0	535	0	525	0	525	0	525	0	525	0
15.8947	0	525	0	525	0	525	0	525	0	530	0	525	0	530	0	525	0	525	0	525	0	525	0	530	0	530	0	525	0	525	0	520	0	525	0	525	0	525	0	535	0	525	0	525	0	525	0	525	0
15.9047	0	525	0	525	0	525	0	525	0	530	0	525	0	530	0	525	0	525	0	525	0	525	0	530	0	530	0	525	0	525	0	520	0	525	0	525	0	525	0	535	0	525	0	525	0	525	0	525	0
15.9147	0	525	0	525	0	525	0	525	0	530	0	525	0	530	0	525	0	525	0	525	0	525	0	530	0	530	0	525	0	525	0	520	0	525	0	525	0	525	0	535	0	525	0	525	0	525	0	525	0
15.9247	0	525	0	525	0	525	0	525	0	530	0	525	0	530	0	525	0	525	0	525	0	525	0	530	0	530	0	525	0	525	0	520	0	525	0	525	0	525	0	535	0	525	0	525	0	525	0	525	0
15.9347	0	525	0	525	0	525	0	525	0	530	0	525	0	530	0	525	0	525	0	525	0	525	0	530	0	530	0	525	0	525	0	520	0	525	0	525	0	525	0	535	0	525	0	525	0	525	0	525	0
15.9448	0	525	0	525	0	525	0	525	0	530	0	525	0	530	0	525	0	525	0	525	0	525	0	530	0	530	0	525	0	525	0	520	0	525	0	525	0	525	0	535	0	525	0	525	0	525	0	525	0
15.9548	0	525	0	525	0	525	0	525	0	530	0	525	0	530	0	525	0	525	0	525	0	525	0	530	0	530	0	525	0	525	0	520	0	525	0	525	0	525	0	535	0	525	0	525	0	525	0	525	0
15.9648	0	525	0	525	0	525	0	525	0	530	0	525	0	530	0	525	0	525	0	525	0	525	0	530	0	530	0	525	0	525	0	520	0	525	0	525	0	525	0	535	0	525	0	525	0	525	0	525	0
15.9748	0	525	0	525	0	525	0	525	0	530	0	525	0	530	0	525	0	525	0	525	0	525	0	530	0	530	0	525	0	525	0	520	0	525	0	525	0	525	0	535	0	525	0	525	0	525	0	525	0
15.9848	0	525	0	525	0	525	0	525	0	530	0	525	0	530	0	525	0	525	0	525	0	525	0	530	0	530	0	525	0	525	0	520	0	525	0	525	0	525	0	535	0	525	0	525	0	525	0	525	0
15.9948	0	525	0	525	0	525	0	525	0	530	0	525	0	530	0	525	0	525	0	525	0	525	0	530	0	530	0	525	0	525	0	520	0	525	0	525	0	525	0	535	0	525	0	525	0	525	0	525	0
16.0048	0	525	0	525	0	525	0	525	0	530	0	525	0	530	0	525	0	525	0	525	0	525	0	530	0	530	0	525	0	525	0	520	0	525	0	525	0	525	0	535	0	525	0	525	0	525	0	525	0
16.0149	0	525	0	525	0	525	0	525	0	530	0	525	0	530	0	525	0	525	0	525	0	525	0	530	0	530	0	525	0	525	0	520	0	525	0	525	0	525	0	535	0	525	0	525	0	525	0	525	0
16.0249	0	525	0	525	0	525	0	525	0	530	0	525	0	530	0	525	0	525	0	525	0	525	0	530	0	530	0	525	0	525	0	520	0	525	0	525	0	525	0	535	0	525	0	525	0	525	0	525	0
16.0349	0	525	0	525	0	525	0	525	0	530	0	525	0	530	0	525	0	525	0	525	0	525	0	530	0	530	0	525	0	525	0	520	0	525	0	525	0	525	0	535	0	525	0	525	0	525	0	525	0
16.0449	0	525	0	525	0	525	0	525	0	530	0	525	0	530	0	525	0	525	0	525	0	525	0	530	0	530	0	525	0	525	0	520	0	525	0	525	0	525	0	535	0	525	0	525	0	525	0	525	0
16.0549	0	525	0	525	0	525	0	525	0	530	0	525	0	530	0	525	0	525	0	525	0	525	0	530	0	530	0	525	0	525	0	520	0	525	0	525	0	525	0	535	0	525	0	525	0	525	0	525	0
16.0649	0	525	0	525	0	525	0	525	0	530	0	525	0	530	0	525	0	525	0	525	0	525	0	530	0	530	0	525	0	525	0	520	0	525	0	525	0	525	0	535	0	525	0	525	0	525	0	525	0
16.075	0	525	0	525	0	525	0	525	0	530	0	525	0	530	0	525	0	525	0	525	0	525	0	530	0	530	0	525	0	525	0	520	0	525	0	525	0	525	0	535	0	525	0	525	0	525	0	525	0
16.085	0	525	0	525	0	525	0	525	0	530	0	525	0	530	0	525	0	525	0	525	0	525	0	530	0	530	0	525	0	525	0	520	0	525	0	525	0	525	0	535	0	525	0	525	0	525	0	525	0
16.095	0	525	0	525	0	525	0	525	0	530	0	525	0	530	0	525	0	525	0	525	0	525	0	530	0	530	0	525	0	525	0	520	0	525	0	525	0	525	0	535	0	525	0	525	0	525	0	525	0
16.105	0	525	0	525	0	525	0	525	0	530	0	525	0	530	0	525	0	525	0	525	0	525	0	530	0	530	0	525	0	525	0	520	0	525	0	525	0	525	0	535	0	525	0	525	0	525	0	525	0
16.115	0	525	0	525	0	525	0	525	0	530	0	525	0	530	0	525	0	525	0	525	0	525	0	530	0	530	0	525	0	525	0	520	0	525	0	525	0	525	0	535	0	525	0	525	0	525	0	525	0
16.125	0	525	0	525	0	525	0	525	0	530	0	525	0	530	0	525	0	525	0	525	0	525	0	530	0	530	0	525	0	525	0	520	0	525	0	525	0	525	0	535	0	525	0	525	0	525	0	525	0
16.135	0	525	0	525	0	525	0	525	0	530	0	525	0	530	0	525	0	525	0	525	0	525	0	530	0	530	0	525	0	525	0	520	0	525	0	525	0	525	0	535	0	525	0	525	0	525	0	525	0
16.1451	0	525	0	525	0	525	0	525	0	530	0	525	0	530	0	525	0	525	0	525	0	525	0	530	0	530	0	525	0	525	0	520	0	525	0	525	0	525	0	535	0	525	0	525	0	525	0	525	0
16.1551	0	525	0	525	0	525	0	525	0	530	0	525	0	530	0	525	0	525	0	525	0	525	0	530	0	530	0	525	0	525	0	520	0	525	0	525	0	525	0	535	0	525	0	525	0	525	0	525	0
16.1651	0	525	0	525	0	525	0	525	0	530	0	525	0	530	0	525	0	525	0	525	0	525	0	530	0	530	0	525	0	525	0	520	0	525	0	525	0	525	0	535	0	525	0	525	0	525	0	525	0
16.1751	0	525	0	525	0	525	0	525	0	530	0	525	0	530	0	525	0	525	0	525	0	525	0	530	0	530	0	525	0	525	0	520	0	525	0	525	0	525	0	535	0	525	0	525	0	525	0	525	0
16.1851	0	525	0	525	0	525	0	525	0	530	0	525	0	530	0	525	0	525	0	525	0	525	0	530	0	530	0	525	0	525	0	520	0	525	0	525	0	525	0	535	0	525	0	525	0	525	0	525	0
16.1951	0	525	0	525	0	525	0	525	0	530	0	525	0	530	0	525	0	525	0	525	0	525	0	530	0	530	0	525	0	525	0	520	0	525	0	525	0	525	0	535	0	525	0	525	0	525	0	525	0
16.2052	0	525	0	525	0	525	0	525	0	530	0	525	0	530	0	525	0	525	0	525	0	525	0	530	0	530	0	525	0	525	0	520	0	525	0	525	0	525	0	535	0	525	0	525	0	525	0	525	0
16.2152	0	525	0	525	0	525	0	525	0	530	0	525	0	530	0	525	0	525	0	525	0	525	0	530	0	530	0	525	0	525	0	520	0	525	0	525	0	525	0	535	0	525	0	525	0	525	0	525	0
16.2252	0	525	0	525	0	525	0	525	0	530	0	525	0	530	0	525	0	525	0	525	0	525	0	530	0	530	0	525	0	525	0	520	0	525	0	525	0	525	0	535	0	525	0	525	0	525	0	525	0
16.2352	0	525	0	525	0	525	0	525	0	530	0	525	0	530	0	525	0	525	0	525	0	525	0	530	0	530	0	525	0	525	0	520	0	525	0	525	0	525	0	535	0	525	0	525	0	525	0	525	0
16.2452	0	525	0	525	0	525	0	525	0	530	0	525	0	530	0	525	0	525	0	525	0	525	0	530	0	530	0	525	0	525	0	520	0	525	0	525	0	525	0	535	0	525	0	525	0	525	0	525	0
16.2552	0	525	0	525	0	525	0	525	0	530	0	525	0	530	0	525	0	525	0	525	0	525	0	530	0	530	0	525	0	525	0	520	0	525	0	525	0	525	0	535	0	525	0	525	0	525	0	525	0
16.2652	0	525	0	525	0	525	0	525	0	530	0	525	0	530	0	525	0	525	0	525	0	525	0	530	0	530	0	525	0	525	0	520	0	525	0	525	0	525	0	535	0	525	0	525	0	525	0	525	0
16.2753	0	525	0	525	0	525	0	525	0	530	0	525	0	530	0	525	0	525	0	525	0	525	0	530	0	530	0	525	0	525	0	520	0	525	0	525	0	525	0	535	0	525	0	525	0	525	0	525	0
16.2853	0	525	0	525	0	525	0	525	0	530	0	525	0	530	0	525	0	525	0	525	0	525	0	530	0	530	0	525	0	525	0	520	0	525	0	525	0	525	0	535	0	525	0	525	0	525	0	525	0
16.2953	0	525	0	525	0	525	0	525	0	530	0	525	0	530	0	525	0	525	0	525	0	525	0	530	0	530	0	525	0	525	0	520	0	525	0	525	0	525	0	535	0	525	0	525	0	525	0	525	0
16.3053	0	525	0	525	0	525	0	525	0	530	0	525	0	530	0	525	0	525	0	525	0	525	0	530	0	530	0	525	0	525	0	520	0	525	0	525	0	525	0	535	0	525	0	525	0	525	0	525	0
16.3153	0	525	0	525	0	525	0	525	0	530	0	525	0	530	0	525	0	525	0	525	0	525	0	530	0	530	0	525	0	525	0	520	0	525	0	525	0	525	0	535	0	525	0	525	0	525	0	525	0
16.3253	0	525	0	525	0	525	0	525	0	530	0	525	0	530	0	525	0	525	0	525	0	525	0	530	0	530	0	525	0	525	0	520	0	525	0	525	0	525	0	535	0	525	0	525	0	525	0	525	0
16.3354	0	525	0	525	0	525	0	525	0	530	0	525	0	530	0	525	0	525	0	525	0	525	0	530	0	530	0	525	0	525	0	520	0	525	0	525	0	525	0	535	0	525	0	525	0	525	0	525	0
16.3454	0	525	0	525	0	525	0	525	0	530	0	525	0	530	0	525	0	525	0	525	0	525	0	530	0	530	0	525	0	525	0	520	0	525	0	525	0	525	0	535	0	525	0	525	0	525	0	525	0
16.3554	0	525	0	525	0	525	0	525	0	530	0	525	0	530	0	525	0	525	0	525	0	525	0	530	0	530	0	525	0	525	0	520	0	525	0	525	0	525	0	535	0	525	0	525	0	525	0	525	0
16.3654	0	525	0	525	0	525	0	525	0	530	0	525	0	530	0	525	0	525	0	525	0	525	0	530	0	530	0	525	0	525	0	520	0	525	0	525	0	525	0	535	0	525	0	525	0	525	0	525	0
16.3754	0	525	0	525	0	525	0	525	0	530	0	525	0	530	0	525	0	525	0	525	0	525	0	530	0	530	0	525	0	525	0	520	0	525	0	525	0	525	0	535	0	525	0	525	0	525	0	525	0
16.3854	0	525	0	525	0	525	0	525	0	530	0	525	0	530	0	525	0	525	0	525	0	525	0	530	0	530	0	525	0	525	0	520	0	525	0	525	0	525	0	535	0	525	0	525	0	525	0	525	0
16.3955	0	525	0	525	0	525	0	525	0	530	0	525	0	530	0	525	0	525	0	525	0	525	0	530	0	530	0	525	0	525	0	520	0	525	0	525	0	525	0	535	0	525	0	525	0	525	0	525	0
16.4055	0	525	0	525	0	525	0	525	0	530	0	525	0	530	0	525	0	525	0	525	0	525	0	530	0	530	0	525	0	525	0	520	0	525	0	525	0	525	0	535	0	525	0	525	0	525	0	525	0
16.4155	0	525	0	525	0	525	0	525	0	530	0	525	0	530	0	525	0	525	0	525	0	525	0	530	0	530	0	525	0	525	0	520	0	525	0	525	0	525	0	535	0	525	0	525	0	525	0	525	0
16.4255	0	525	0	525	0	525	0	525	0	530	0	525	0	530	0	525	0	525	0	525	0	525	0	530	0	530	0	525	0	525	0	520	0	525	0	525	0	525	0	535	0	525	0	525	0	525	0	525	0
16.4355	0	525	0	525	0	525	0	525	0	530	0	525	0	530	0	525	0	525	0	525	0	525	0	530	0	530	0	525	0	525	0	520	0	525	0	525	0	525	0	535	0	525	0	525	0	525	0	525	0
16.4455	0	525	0	525	0	525	0	525	0	530	0	525	0	530	0	525	0	525	0	525	0	525	0	530	0	530	0	525	0	525	0	520	0	525	0	525	0	525	0	535	0	525	0	525	0	525	0	525	0
16.4555	0	525	0	525	0	525	0	525	0	530	0	525	0	530	0	525	0	525	0	525	0	525	0	530	0	530	0	525	0	525	0	520	0	525	0	525	0	525	0	535	0	525	0	525	0	525	0	525	0
16.4656	0	525	0	525	0	525	0	525	0	530	0	525	0	530	0	525	0	525	0	525	0	525	0	530	0	530	0	525	0	525	0	520	0	525	0	525	0	525	0	535	0	525	0	525	0	525	0	525	0
16.4756	0	525	0	525	0	525	0	525	0	530	0	525	0	530	0	525	0	525	0	525	0	525	0	530	0	530	0	525	0	525	0	520	0	525	0	525	0	525	0	535	0	525	0	525	0	525	0	525	0
16.4856	0	525	0	525	0	525	0	525	0	530	0	525	0	530	0	525	0	525	0	525	0	525	0	530	0	530	0	525	0	525	0	520	0	525	0	525	0	525	0	535	0	525	0	525	0	525	0	525	0
16.4956	0	525	0	525	0	525	0	525	0	530	0	525	0	530	0	525	0	525	0	525	0	525	0	530	0	530	0	525	0	525	0	520	0	525	0	525	0	525	0	535	0	525	0	525	0	525	0	525	0
16.5056	0	525	0	525	0	525	0	525	0	530	0	525	0	530	0	525	0	525	0	525	0	525	0	530	0	530	0	525	0	525	0	520	0	525	0	525	0	525	0	535	0	525	0	525	0	525	0	525	0
16.5156	0	525	0	525	0	525	0	525	0	530	0	525	0	530	0	525	0	525	0	525	0	525	0	530	0	530	0	525	0	525	0	520	0	525	0	525	0	525	0	535	0	525	0	525	0	525	0	525	0
16.5257	0	525	0	525	0	525	0	525	0	530	0	525	0	530	0	525	0	525	0	525	0	525	0	530	0	530	0	525	0	525	0	520	0	525	0	525	0	525	0	535	0	525	0	525	0	525	0	525	0
16.5357	0	525	0	525	0	525	0	525	0	530	0	525	0	530	0	525	0	525	0	525	0	525	0	530	0	530	0	525	0	525	0	520	0	525	0	525	0	525	0	535	0	525	0	525	0	525	0	525	0
16.5457	0	525	0	525	0	525	0	525	0	530	0	525	0	530	0	525	0	525	0	525	0	525	0	530	0	530	0	525	0	525	0	520	0	525	0	525	0	525	0	535	0	525	0	525	0	525	0	525	0
16.5557	0	525	0	525	0	525	0	525	0	530	0	525	0	530	0	525	0	525	0	525	0	525	0	530	0	530	0	525	0	525	0	520	0	525	0	525	0	525	0	535	0	525	0	525	0	525	0	525	0
16.5657	0	525	0	525	0	525	0	525	0	530	0	525	0	530	0	525	0	525	0	525	0	525	0	530	0	530	0	525	0	525	0	520	0	525	0	525	0	525	0	535	0	525	0	525	0	525	0	525	0
16.5757	0	525	0	525	0	525	0	525	0	530	0	525	0	530	0	525	0	525	0	525	0	525	0	530	0	530	0	525	0	525	0	520	0	525	0	525	0	525	0	535	0	525	0	525	0	525	0	525	0
16.5857	0	525	0	525	0	525	0	525	0	530	0	525	0	530	0	525	0	525	0	525	0	525	0	530	0	530	0	525	0	525	0	520	0	525	0	525	0	525	0	535	0	525	0	525	0	525	0	525	0
16.5958	0	525	0	525	0	525	0	525	0	530	0	525	0	530	0	525	0	525	0	525	0	525	0	530	0	530	0	525	0	525	0	520	0	525	0	525	0	525	0	535	0	525	0	525	0	525	0	525	0
16.6058	0	525	0	525	0	525	0	525	0	530	0	525	0	530	0	525	0	525	0	525	0	525	0	530	0	530	0	525	0	525	0	520	0	525	0	525	0	525	0	535	0	525	0	525	0	525	0	525	0
16.6158	0	525	0	525	0	525	0	525	0	530	0	525	0	530	0	525	0	525	0	525	0	525	0	530	0	530	0	525	0	525	0	520	0	525	0	525	0	525	0	535	0	525	0	525	0	525	0	525	0
16.6258	0	525	0	525	0	525	0	525	0	530	0	525	0	530	0	525	0	525	0	525	0	525	0	530	0	530	0	525	0	525	0	520	0	525	0	525	0	525	0	535	0	525	0	525	0	525	0	525	0
16.6358	0	525	0	525	0	525	0	525	0	530	0	525	0	530	0	525	0	525	0	525	0	525	0	530	0	530	0	525	0	525	0	520	0	525	0	525	0	525	0	535	0	525	0	525	0	525	0	525	0
16.6458	0	525	0	525	0	525	0	525	0	530	0	525	0	530	0	525	0	525	0	525	0	525	0	530	0	530	0	525	0	525	0	520	0	525	0	525	0	525	0	535	0	525	0	525	0	525	0	525	0
16.6559	0	525	0	525	0	525	0	525	0	530	0	525	0	530	0	525	0	525	0	525	0	525	0	530	0	530	0	525	0	525	0	520	0	525	0	525	0	525	0	535	0	525	0	525	0	525	0	525	0
16.6659	0	525	0	525	0	525	0	525	0	530	0	525	0	530	0	525	0	525	0	525	0	525	0	530	0	530	0	525	0	525	0	520	0	525	0	525	0	525	0	535	0	525	0	525	0	525	0	525	0
16.6759	0	525	0	525	0	525	0	525	0	530	0	525	0	530	0	525	0	525	0	525	0	525	0	530	0	530	0	525	0	525	0	520	0	525	0	525	0	525	0	535	0	525	0	525	0	525	0	525	0
16.6859	0	525	0	525	0	525	0	525	0	530	0	525	0	530	0	525	0	525	0	525	0	525	0	530	0	530	0	525	0	525	0	520	0	525	0	525	0	525	0	535	0	525	0	525	0	525	0	525	0
16.6959	0	525	0	525	0	525	0	525	0	530	0	525	0	530	0	525	0	525	0	525	0	525	0	530	0	530	0	525	0	525	0	520	0	525	0	525	0	525	0	535	0	525	0	525	0	525	0	525	0
16.7059	0	525	0	525	0	525	0	525	0	530	0	525	0	530	0	525	0	525	0	525	0	525	0	530	0	530	0	525	0	525	0	520	0	525	0	525	0	525	0	535	0	525	0	525	0	525	0	525	0
16.7159	0	525	0	525	0	525	0	525	0	530	0	525	0	530	0	525	0	525	0	525	0	525	0	530	0	530	0	525	0	525	0	520	0	525	0	525	0	525	0	535	0	525	0	525	0	525	0	525	0
16.726	0	525	0	525	0	525	0	525	0	530	0	525	0	530	0	525	0	525	0	525	0	525	0	530	0	530	0	525	0	525	0	520	0	525	0	525	0	525	0	535	0	525	0	525	0	525	0	525	0
16.736	0	525	0	525	0	525	0	525	0	530	0	525	0	530	0	525	0	525	0	525	0	525	0	530	0	530	0	525	0	525	0	520	0	525	0	525	0	525	0	535	0	525	0	525	0	525	0	525	0
16.746	0	525	0	525	0	525	0	525	0	530	0	525	0	530	0	525	0	525	0	525	0	525	0	530	0	530	0	525	0	525	0	520	0	525	0	525	0	525	0	535	0	525	0	525	0	525	0	525	0
16.756	0	525	0	525	0	525	0	525	0	530	0	525	0	530	0	525	0	525	0	525	0	525	0	530	0	530	0	525	0	525	0	520	0	525	0	525	0	525	0	535	0	525	0	525	0	525	0	525	0
16.766	0	525	0	525	0	525	0	525	0	530	0	525	0	530	0	525	0	525	0	525	0	525	0	530	0	530	0	525	0	525	0	520	0	525	0	525	0	525	0	535	0	525	0	525	0	525	0	525	0
16.776	0	525	0	525	0	525	0	525	0	530	0	525	0	530	0	525	0	525	0	525	0	525	0	530	0	530	0	525	0	525	0	520	0	525	0	525	0	525	0	535	0	525	0	525	0	525	0	525	0
16.7861	0	525	0	525	0	525	0	525	0	530	0	525	0	530	0	525	0	525	0	525	0	525	0	530	0	530	0	525	0	525	0	520	0	525	0	525	0	525	0	535	0	525	0	525	0	525	0	525	0
16.7961	0	525	0	525	0	525	0	525	0	530	0	525	0	530	0	525	0	525	0	525	0	525	0	530	0	530	0	525	0	525	0	520	0	525	0	525	0	525	0	535	0	525	0	525	0	525	0	525	0
16.8061	0	525	0	525	0	525	0	525	0	530	0	525	0	530	0	525	0	525	0	525	0	525	0	530	0	530	0	525	0	525	0	520	0	525	0	525	0	525	0	535	0	525	0	525	0	525	0	525	0
16.8161	0	525	0	525	0	525	0	525	0	530	0	525	0	530	0	525	0	525	0	525	0	525	0	530	0	530	0	525	0	525	0	520	0	525	0	525	0	525	0	535	0	525	0	525	0	525	0	525	0
16.8261	0	525	0	525	0	525	0	525	0	530	0	525	0	530	0	525	0	525	0	525	0	525	0	530	0	530	0	525	0	525	0	520	0	525	0	525	0	525	0	535	0	525	0	525	0	525	0	525	0
16.8361	0	525	0	525	0	525	0	525	0	530	0	525	0	530	0	525	0	525	0	525	0	525	0	530	0	530	0	525	0	525	0	520	0	525	0	525	0	525	0	535	0	525	0	525	0	525	0	525	0
16.8462	0	525	0	525	0	525	0	525	0	530	0	525	0	530	0	525	0	525	0	525	0	525	0	530	0	530	0	525	0	525	0	520	0	525	0	525	0	525	0	535	0	525	0	525	0	525	0	525	0
16.8562	0	525	0	525	0	525	0	525	0	530	0	525	0	530	0	525	0	525	0	525	0	525	0	530	0	530	0	525	0	525	0	520	0	525	0	525	0	525	0	535	0	525	0	525	0	525	0	525	0
16.8662	0	525	0	525	0	525	0	525	0	530	0	525	0	530	0	525	0	525	0	525	0	525	0	530	0	530	0	525	0	525	0	520	0	525	0	525	0	525	0	535	0	525	0	525	0	525	0	525	0
16.8762	0	525	0	525	0	525	0	525	0	530	0	525	0	530	0	525	0	525	0	525	0	525	0	530	0	530	0	525	0	525	0	520	0	525	0	525	0	525	0	535	0	525	0	525	0	525	0	525	0
16.8862	0	525	0	525	0	525	0	525	0	530	0	525	0	530	0	525	0	525	0	525	0	525	0	530	0	530	0	525	0	525	0	520	0	525	0	525	0	525	0	535	0	525	0	525	0	525	0	525	0
16.8962	0	525	0	525	0	525	0	525	0	530	0	525	0	530	0	525	0	525	0	525	0	525	0	530	0	530	0	525	0	525	0	520	0	525	0	525	0	525	0	535	0	525	0	525	0	525	0	525	0
16.9062	0	525	0	525	0	525	0	525	0	530	0	525	0	530	0	525	0	525	0	525	0	525	0	530	0	530	0	525	0	525	0	520	0	525	0	525	0	525	0	535	0	525	0	525	0	525	0	525	0
16.9163	0	525	0	525	0	525	0	525	0	530	0	525	0	530	0	525	0	525	0	525	0	525	0	530	0	530	0	525	0	525	0	520	0	525	0	525	0	525	0	535	0	525	0	525	0	525	0	525	0
16.9263	0	525	0	525	0	525	0	525	0	530	0	525	0	530	0	525	0	525	0	525	0	525	0	530	0	530	0	525	0	525	0	520	0	525	0	525	0	525	0	535	0	525	0	525	0	525	0	525	0
16.9363	0	525	0	525	0	525	0	525	0	530	0	525	0	530	0	525	0	525	0	525	0	525	0	530	0	530	0	525	0	525	0	520	0	525	0	525	0	525	0	535	0	525	0	525	0	525	0	525	0
16.9463	0	525	0	525	0	525	0	525	0	530	0	525	0	530	0	525	0	525	0	525	0	525	0	530	0	530	0	525	0	525	0	520	0	525	0	525	0	525	0	535	0	525	0	525	0	525	0	525	0
16.9563	0	525	0	525	0	525	0	525	0	530	0	525	0	530	0	525	0	525	0	525	0	525	0	530	0	530	0	525	0	525	0	520	0	525	0	525	0	525	0	535	0	525	0	525	0	525	0	525	0
16.9663	0	525	0	525	0	525	0	525	0	530	0	525	0	530	0	525	0	525	0	525	0	525	0	530	0	530	0	525	0	525	0	520	0	525	0	525	0	525	0	535	0	525	0	525	0	525	0	525	0
16.9764	0	525	0	525	0	525	0	525	0	530	0	525	0	530	0	525	0	525	0	525	0	525	0	530	0	530	0	525	0	525	0	520	0	525	0	525	0	525	0	535	0	525	0	525	0	525	0	525	0
16.9864	0	525	0	525	0	525	0	525	0	530	0	525	0	530	0	525	0	525	0	525	0	525	0	530	0	530	0	525	0	525	0	520	0	525	0	525	0	525	0	535	0	525	0	525	0	525	0	525	0
16.9964	0	525	0	525	0	525	0	525	0	530	0	525	0	530	0	525	0	525	0	525	0	525	0	530	0	530	0	525	0	525	0	520	0	525	0	525	0	525	0	535	0	525	0	525	0	525	0	525	0
17.0064	0	525	0	525	0	525	0	525	0	530	0	525	0	530	0	525	0	525	0	525	0	525	0	530	0	530	0	525	0	525	0	520	0	525	0	525	0	525	0	535	0	525	0	525	0	525	0	525	0
17.0164	0	525	0	525	0	525	0	525	0	530	0	525	0	530	0	525	0	525	0	525	0	525	0	530	0	530	0	525	0	525	0	520	0	525	0	525	0	525	0	535	0	525	0	525	0	525	0	525	0
17.0264	0	525	0	525	0	525	0	525	0	530	0	525	0	530	0	525	0	525	0	525	0	525	0	530	0	530	0	525	0	525	0	520	0	525	0	525	0	525	0	535	0	525	0	525	0	525	0	525	0
17.0364	0	525	0	525	0	525	0	525	0	530	0	525	0	530	0	525	0	525	0	525	0	525	0	530	0	530	0	525	0	525	0	520	0	525	0	525	0	525	0	535	0	525	0	525	0	525	0	525	0
17.0465	0	525	0	525	0	525	0	525	0	530	0	525	0	530	0	525	0	525	0	525	0	525	0	530	0	530	0	525	0	525	0	520	0	525	0	525	0	525	0	535	0	525	0	525	0	525	0	525	0
17.0565	0	525	0	525	0	525	0	525	0	530	0	525	0	530	0	525	0	525	0	525	0	525	0	530	0	530	0	525	0	525	0	520	0	525	0	525	0	525	0	535	0	525	0	525	0	525	0	525	0
17.0665	0	525	0	525	0	525	0	525	0	530	0	525	0	530	0	525	0	525	0	525	0	525	0	530	0	530	0	525	0	525	0	520	0	525	0	525	0	525	0	535	0	525	0	525	0	525	0	525	0
17.0765	0	525	0	525	0	525	0	525	0	530	0	525	0	530	0	525	0	525	0	525	0	525	0	530	0	530	0	525	0	525	0	520	0	525	0	525	0	525	0	535	0	525	0	525	0	525	0	525	0
17.0865	0	525	0	525	0	525	0	525	0	530	0	525	0	530	0	525	0	525	0	525	0	525	0	530	0	530	0	525	0	525	0	520	0	525	0	525	0	525	0	535	0	525	0	525	0	525	0	525	0
17.0965	0	525	0	525	0	525	0	525	0	530	0	525	0	530	0	525	0	525	0	525	0	525	0	530	0	530	0	525	0	525	0	520	0	525	0	525	0	525	0	535	0	525	0	525	0	525	0	525	0
17.1066	0	525	0	525	0	525	0	525	0	530	0	525	0	530	0	525	0	525	0	525	0	525	0	530	0	530	0	525	0	525	0	520	0	525	0	525	0	525	0	535	0	525	0	525	0	525	0	525	0
17.1166	0	525	0	525	0	525	0	525	0	530	0	525	0	530	0	525	0	525	0	525	0	525	0	530	0	530	0	525	0	525	0	520	0	525	0	525	0	525	0	535	0	525	0	525	0	525	0	525	0
17.1266	0	525	0	525	0	525	0	525	0	530	0	525	0	530	0	525	0	525	0	525	0	525	0	530	0	530	0	525	0	525	0	520	0	525	0	525	0	525	0	535	0	525	0	525	0	525	0	525	0
17.1366	0	525	0	525	0	525	0	525	0	530	0	525	0	530	0	525	0	525	0	525	0	525	0	530	0	530	0	525	0	525	0	520	0	525	0	525	0	525	0	535	0	525	0	525	0	525	0	525	0
17.1466	0	525	0	525	0	525	0	525	0	530	0	525	0	530	0	525	0	525	0	525	0	525	0	530	0	530	0	525	0	525	0	520	0	525	0	525	0	525	0	535	0	525	0	525	0	525	0	525	0
17.1566	0	525	0	525	0	525	0	525	0	530	0	525	0	530	0	525	0	525	0	525	0	525	0	530	0	530	0	525	0	525	0	520	0	525	0	525	0	525	0	535	0	525	0	525	0	525	0	525	0
17.1666	0	525	0	525	0	525	0	525	0	530	0	525	0	530	0	525	0	525	0	525	0	525	0	530	0	530	0	525	0	525	0	520	0	525	0	525	0	525	0	535	0	525	0	525	0	525	0	525	0
17.1767	0	525	0	525	0	525	0	525	0	530	0	525	0	530	0	525	0	525	0	525	0	525	0	530	0	530	0	525	0	525	0	520	0	525	0	525	0	525	0	535	0	525	0	525	0	525	0	525	0
17.1867	0	525	0	525	0	525	0	525	0	530	0	525	0	530	0	525	0	525	0	525	0	525	0	530	0	530	0	525	0	525	0	520	0	525	0	525	0	525	0	535	0	525	0	525	0	525	0	525	0
17.1967	0	525	0	525	0	525	0	525	0	530	0	525	0	530	0	525	0	525	0	525	0	525	0	530	0	530	0	525	0	525	0	520	0	525	0	525	0	525	0	535	0	525	0	525	0	525	0	525	0
17.2067	0	525	0	525	0	525	0	525	0	530	0	525	0	530	0	525	0	525	0	525	0	525	0	530	0	530	0	525	0	525	0	520	0	525	0	525	0	525	0	535	0	525	0	525	0	525	0	525	0
17.2167	0	525	0	525	0	525	0	525	0	530	0	525	0	530	0	525	0	525	0	525	0	525	0	530	0	530	0	525	0	525	0	520	0	525	0	525	0	525	0	535	0	525	0	525	0	525	0	525	0
17.2267	0	525	0	525	0	525	0	525	0	530	0	525	0	530	0	525	0	525	0	525	0	525	0	530	0	530	0	525	0	525	0	520	0	525	0	525	0	525	0	535	0	525	0	525	0	525	0	525	0
17.2368	0	525	0	525	0	525	0	525	0	530	0	525	0	530	0	525	0	525	0	525	0	525	0	530	0	530	0	525	0	525	0	520	0	525	0	525	0	525	0	535	0	525	0	525	0	525	0	525	0
17.2468	0	525	0	525	0	525	0	525	0	530	0	525	0	530	0	525	0	525	0	525	0	525	0	530	0	530	0	525	0	525	0	520	0	525	0	525	0	525	0	535	0	525	0	525	0	525	0	525	0
17.2568	0	525	0	525	0	525	0	525	0	530	0	525	0	530	0	525	0	525	0	525	0	525	0	530	0	530	0	525	0	525	0	520	0	525	0	525	0	525	0	535	0	525	0	525	0	525	0	525	0
17.2668	0	525	0	525	0	525	0	525	0	530	0	525	0	530	0	525	0	525	0	525	0	525	0	530	0	530	0	525	0	525	0	520	0	525	0	525	0	525	0	535	0	525	0	525	0	525	0	525	0
17.2768	0	525	0	525	0	525	0	525	0	530	0	525	0	530	0	525	0	525	0	525	0	525	0	530	0	530	0	525	0	525	0	520	0	525	0	525	0	525	0	535	0	525	0	525	0	525	0	525	0
17.2868	0	525	0	525	0	525	0	525	0	530	0	525	0	530	0	525	0	525	0	525	0	525	0	530	0	530	0	525	0	525	0	520	0	525	0	525	0	525	0	535	0	525	0	525	0	525	0	525	0
17.2969	0	525	0	525	0	525	0	525	0	530	0	525	0	530	0	525	0	525	0	525	0	525	0	530	0	530	0	525	0	525	0	520	0	525	0	525	0	525	0	535	0	525	0	525	0	525	0	525	0
17.3069	0	525	0	525	0	525	0	525	0	530	0	525	0	530	0	525	0	525	0	525	0	525	0	530	0	530	0	525	0	525	0	520	0	525	0	525	0	525	0	535	0	525	0	525	0	525	0	525	0
17.3169	0	525	0	525	0	525	0	525	0	530	0	525	0	530	0	525	0	525	0	525	0	525	0	530	0	530	0	525	0	525	0	520	0	525	0	525	0	525	0	535	0	525	0	525	0	525	0	525	0
17.3269	0	525	0	525	0	525	0	525	0	530	0	525	0	530	0	525	0	525	0	525	0	525	0	530	0	530	0	525	0	525	0	520	0	525	0	525	0	525	0	535	0	525	0	525	0	525	0	525	0
17.3369	0	525	0	525	0	525	0	525	0	530	0	525	0	530	0	525	0	525	0	525	0	525	0	530	0	530	0	525	0	525	0	520	0	525	0	525	0	525	0	535	0	525	0	525	0	525	0	525	0
17.3469	0	525	0	525	0	525	0	525	0	530	0	525	0	530	0	525	0	525	0	525	0	525	0	530	0	530	0	525	0	525	0	520	0	525	0	525	0	525	0	535	0	525	0	525	0	525	0	525	0
17.3569	0	525	0	525	0	525	0	525	0	530	0	525	0	530	0	525	0	525	0	525	0	525	0	530	0	530	0	525	0	525	0	520	0	525	0	525	0	525	0	535	0	525	0	525	0	525	0	525	0
17.367	0	525	0	525	0	525	0	525	0	530	0	525	0	530	0	525	0	525	0	525	0	525	0	530	0	530	0	525	0	525	0	520	0	525	0	525	0	525	0	535	0	525	0	525	0	525	0	525	0
17.377	0	525	0	525	0	525	0	525	0	530	0	525	0	530	0	525	0	525	0	525	0	525	0	530	0	530	0	525	0	525	0	520	0	525	0	525	0	525	0	535	0	525	0	525	0	525	0	525	0
17.387	0	525	0	525	0	525	0	525	0	530	0	525	0	530	0	525	0	525	0	525	0	525	0	530	0	530	0	525	0	525	0	520	0	525	0	525	0	525	0	535	0	525	0	525	0	525	0	525	0
17.397	0	525	0	525	0	525	0	525	0	530	0	525	0	530	0	525	0	525	0	525	0	525	0	530	0	530	0	525	0	525	0	520	0	525	0	525	0	525	0	535	0	525	0	525	0	525	0	525	0
17.407	0	525	0	525	0	525	0	525	0	530	0	525	0	530	0	525	0	525	0	525	0	525	0	530	0	530	0	525	0	525	0	520	0	525	0	525	0	525	0	535	0	525	0	525	0	525	0	525	0
17.417	0	525	0	525	0	525	0	525	0	530	0	525	0	530	0	525	0	525	0	525	0	525	0	530	0	530	0	525	0	525	0	520	0	525	0	525	0	525	0	535	0	525	0	525	0	525	0	525	0
17.4271	0	525	0	525	0	525	0	525	0	530	0	525	0	530	0	525	0	525	0	525	0	525	0	530	0	530	0	525	0	525	0	520	0	525	0	525	0	525	0	535	0	525	0	525	0	525	0	525	0
17.4371	0	525	0	525	0	525	0	525	0	530	0	525	0	530	0	525	0	525	0	525	0	525	0	530	0	530	0	525	0	525	0	520	0	525	0	525	0	525	0	535	0	525	0	525	0	525	0	525	0
17.4471	0	525	0	525	0	525	0	525	0	530	0	525	0	530	0	525	0	525	0	525	0	525	0	530	0	530	0	525	0	525	0	520	0	525	0	525	0	525	0	535	0	525	0	525	0	525	0	525	0
17.4571	0	525	0	525	0	525	0	525	0	530	0	525	0	530	0	525	0	525	0	525	0	525	0	530	0	530	0	525	0	525	0	520	0	525	0	525	0	525	0	535	0	525	0	525	0	525	0	525	0
17.4671	0	525	0	525	0	525	0	525	0	530	0	525	0	530	0	525	0	525	0	525	0	525	0	530	0	530	0	525	0	525	0	520	0	525	0	525	0	525	0	535	0	525	0	525	0	525	0	525	0
17.4771	0	525	0	525	0	525	0	525	0	530	0	525	0	530	0	525	0	525	0	525	0	525	0	530	0	530	0	525	0	525	0	520	0	525	0	525	0	525	0	535	0	525	0	525	0	525	0	525	0
17.4871	0	525	0	525	0	525	0	525	0	530	0	525	0	530	0	525	0	525	0	525	0	525	0	530	0	530	0	525	0	525	0	520	0	525	0	525	0	525	0	535	0	525	0	525	0	525	0	525	0
17.4972	0	525	0	525	0	525	0	525	0	530	0	525	0	530	0	525	0	525	0	525	0	525	0	530	0	530	0	525	0	525	0	520	0	525	0	525	0	525	0	535	0	525	0	525	0	525	0	525	0
17.5072	0	525	0	525	0	525	0	525	0	530	0	525	0	530	0	525	0	525	0	525	0	525	0	530	0	530	0	525	0	525	0	520	0	525	0	525	0	525	0	535	0	525	0	525	0	525	0	525	0
17.5172	0	525	0	525	0	525	0	525	0	530	0	525	0	530	0	525	0	525	0	525	0	525	0	530	0	530	0	525	0	525	0	520	0	525	0	525	0	525	0	535	0	525	0	525	0	525	0	525	0
17.5272	0	525	0	525	0	525	0	525	0	530	0	525	0	530	0	525	0	525	0	525	0	525	0	530	0	530	0	525	0	525	0	520	0	525	0	525	0	525	0	535	0	525	0	525	0	525	0	525	0
17.5372	0	525	0	525	0	525	0	525	0	530	0	525	0	530	0	525	0	525	0	525	0	525	0	530	0	530	0	525	0	525	0	520	0	525	0	525	0	525	0	535	0	525	0	525	0	525	0	525	0
17.5472	0	525	0	525	0	525	0	525	0	530	0	525	0	530	0	525	0	525	0	525	0	525	0	530	0	530	0	525	0	525	0	520	0	525	0	525	0	525	0	535	0	525	0	525	0	525	0	525	0
17.5573	0	525	0	525	0	525	0	525	0	530	0	525	0	530	0	525	0	525	0	525	0	525	0	530	0	530	0	525	0	525	0	520	0	525	0	525	0	525	0	535	0	525	0	525	0	525	0	525	0
17.5673	0	525	0	525	0	525	0	525	0	530	0	525	0	530	0	525	0	525	0	525	0	525	0	530	0	530	0	525	0	525	0	520	0	525	0	525	0	525	0	535	0	525	0	525	0	525	0	525	0
17.5773	0	525	0	525	0	525	0	525	0	530	0	525	0	530	0	525	0	525	0	525	0	525	0	530	0	530	0	525	0	525	0	520	0	525	0	525	0	525	0	535	0	525	0	525	0	525	0	525	0
17.5873	0	525	0	525	0	525	0	525	0	530	0	525	0	530	0	525	0	525	0	525	0	525	0	530	0	530	0	525	0	525	0	520	0	525	0	525	0	525	0	535	0	525	0	525	0	525	0	525	0
17.5973	0	525	0	525	0	525	0	525	0	530	0	525	0	530	0	525	0	525	0	525	0	525	0	530	0	530	0	525	0	525	0	520	0	525	0	525	0	525	0	535	0	525	0	525	0	525	0	525	0
17.6073	0	525	0	525	0	525	0	525	0	530	0	525	0	530	0	525	0	525	0	525	0	525	0	530	0	530	0	525	0	525	0	520	0	525	0	525	0	525	0	535	0	525	0	525	0	525	0	525	0
17.6173	0	525	0	525	0	525	0	525	0	530	0	525	0	530	0	525	0	525	0	525	0	525	0	530	0	530	0	525	0	525	0	520	0	525	0	525	0	525	0	535	0	525	0	525	0	525	0	525	0
17.6274	0	525	0	525	0	525	0	525	0	530	0	525	0	530	0	525	0	525	0	525	0	525	0	530	0	530	0	525	0	525	0	520	0	525	0	525	0	525	0	535	0	525	0	525	0	525	0	525	0
17.6374	0	525	0	525	0	525	0	525	0	530	0	525	0	530	0	525	0	525	0	525	0	525	0	530	0	530	0	525	0	525	0	520	0	525	0	525	0	525	0	535	0	525	0	525	0	525	0	525	0
17.6474	0	525	0	525	0	525	0	525	0	530	0	525	0	530	0	525	0	525	0	525	0	525	0	530	0	530	0	525	0	525	0	520	0	525	0	525	0	525	0	535	0	525	0	525	0	525	0	525	0
17.6574	0	525	0	525	0	525	0	525	0	530	0	525	0	530	0	525	0	525	0	525	0	525	0	530	0	530	0	525	0	525	0	520	0	525	0	525	0	525	0	535	0	525	0	525	0	525	0	525	0
17.6674	0	525	0	525	0	525	0	525	0	530	0	525	0	530	0	525	0	525	0	525	0	525	0	530	0	530	0	525	0	525	0	520	0	525	0	525	0	525	0	535	0	525	0	525	0	525	0	525	0
17.6774	0	525	0	525	0	525	0	525	0	530	0	525	0	530	0	525	0	525	0	525	0	525	0	530	0	530	0	525	0	525	0	520	0	525	0	525	0	525	0	535	0	525	0	525	0	525	0	525	0
17.6875	0	525	0	525	0	525	0	525	0	530	0	525	0	530	0	525	0	525	0	525	0	525	0	530	0	530	0	525	0	525	0	520	0	525	0	525	0	525	0	535	0	525	0	525	0	525	0	525	0
17.6975	0	525	0	525	0	525	0	525	0	530	0	525	0	530	0	525	0	525	0	525	0	525	0	530	0	530	0	525	0	525	0	520	0	525	0	525	0	525	0	535	0	525	0	525	0	525	0	525	0
17.7075	0	525	0	525	0	525	0	525	0	530	0	525	0	530	0	525	0	525	0	525	0	525	0	530	0	530	0	525	0	525	0	520	0	525	0	525	0	525	0	535	0	525	0	525	0	525	0	525	0
17.7175	0	525	0	525	0	525	0	525	0	530	0	525	0	530	0	525	0	525	0	525	0	525	0	530	0	530	0	525	0	525	0	520	0	525	0	525	0	525	0	535	0	525	0	525	0	525	0	525	0
17.7275	0	525	0	525	0	525	0	525	0	530	0	525	0	530	0	525	0	525	0	525	0	525	0	530	0	530	0	525	0	525	0	520	0	525	0	525	0	525	0	535	0	525	0	525	0	525	0	525	0
17.7375	0	525	0	525	0	525	0	525	0	530	0	525	0	530	0	525	0	525	0	525	0	525	0	530	0	530	0	525	0	525	0	520	0	525	0	525	0	525	0	535	0	525	0	525	0	525	0	525	0
17.7476	0	525	0	525	0	525	0	525	0	530	0	525	0	530	0	525	0	525	0	525	0	525	0	530	0	530	0	525	0	525	0	520	0	525	0	525	0	525	0	535	0	525	0	525	0	525	0	525	0
17.7576	0	525	0	525	0	525	0	525	0	530	0	525	0	530	0	525	0	525	0	525	0	525	0	530	0	530	0	525	0	525	0	520	0	525	0	525	0	525	0	535	0	525	0	525	0	525	0	525	0
17.7676	0	525	0	525	0	525	0	525	0	530	0	525	0	530	0	525	0	525	0	525	0	525	0	530	0	530	0	525	0	525	0	520	0	525	0	525	0	525	0	535	0	525	0	525	0	525	0	525	0
17.7776	0	525	0	525	0	525	0	525	0	530	0	525	0	530	0	525	0	525	0	525	0	525	0	530	0	530	0	525	0	525	0	520	0	525	0	525	0	525	0	535	0	525	0	525	0	525	0	525	0
17.7876	0	525	0	525	0	525	0	525	0	530	0	525	0	530	0	525	0	525	0	525	0	525	0	530	0	530	0	525	0	525	0	520	0	525	0	525	0	525	0	535	0	525	0	525	0	525	0	525	0
17.7976	0	525	0	525	0	525	0	525	0	530	0	525	0	530	0	525	0	525	0	525	0	525	0	530	0	530	0	525	0	525	0	520	0	525	0	525	0	525	0	535	0	525	0	525	0	525	0	525	0
17.8076	0	525	0	525	0	525	0	525	0	530	0	525	0	530	0	525	0	525	0	525	0	525	0	530	0	530	0	525	0	525	0	520	0	525	0	525	0	525	0	535	0	525	0	525	0	525	0	525	0
17.8177	0	525	0	525	0	525	0	525	0	530	0	525	0	530	0	525	0	525	0	525	0	525	0	530	0	530	0	525	0	525	0	520	0	525	0	525	0	525	0	535	0	525	0	525	0	525	0	525	0
17.8277	0	525	0	525	0	525	0	525	0	530	0	525	0	530	0	525	0	525	0	525	0	525	0	530	0	530	0	525	0	525	0	520	0	525	0	525	0	525	0	535	0	525	0	525	0	525	0	525	0
17.8377	0	525	0	525	0	525	0	525	0	530	0	525	0	530	0	525	0	525	0	525	0	525	0	530	0	530	0	525	0	525	0	520	0	525	0	525	0	525	0	535	0	525	0	525	0	525	0	525	0
17.8477	0	525	0	525	0	525	0	525	0	530	0	525	0	530	0	525	0	525	0	525	0	525	0	530	0	530	0	525	0	525	0	520	0	525	0	525	0	525	0	535	0	525	0	525	0	525	0	525	0
17.8577	0	525	0	525	0	525	0	525	0	530	0	525	0	530	0	525	0	525	0	525	0	525	0	530	0	530	0	525	0	525	0	520	0	525	0	525	0	525	0	535	0	525	0	525	0	525	0	525	0
17.8677	0	525	0	525	0	525	0	525	0	530	0	525	0	530	0	525	0	525	0	525	0	525	0	530	0	530	0	525	0	525	0	520	0	525	0	525	0	525	0	535	0	525	0	525	0	525	0	525	0
17.8778	0	525	0	525	0	525	0	525	0	530	0	525	0	530	0	525	0	525	0	525	0	525	0	530	0	530	0	525	0	525	0	520	0	525	0	525	0	525	0	535	0	525	0	525	0	525	0	525	0
17.8878	0	525	0	525	0	525	0	525	0	530	0	525	0	530	0	525	0	525	0	525	0	525	0	530	0	530	0	525	0	525	0	520	0	525	0	525	0	525	0	535	0	525	0	525	0	525	0	525	0
17.8978	0	525	0	525	0	525	0	525	0	530	0	525	0	530	0	525	0	525	0	525	0	525	0	530	0	530	0	525	0	525	0	520	0	525	0	525	0	525	0	535	0	525	0	525	0	525	0	525	0
17.9078	0	525	0	525	0	525	0	525	0	530	0	525	0	530	0	525	0	525	0	525	0	525	0	530	0	530	0	525	0	525	0	520	0	525	0	525	0	525	0	535	0	525	0	525	0	525	0	525	0
17.9178	0	525	0	525	0	525	0	525	0	530	0	525	0	530	0	525	0	525	0	525	0	525	0	530	0	530	0	525	0	525	0	520	0	525	0	525	0	525	0	535	0	525	0	525	0	525	0	525	0
17.9278	0	525	0	525	0	525	0	525	0	530	0	525	0	530	0	525	0	525	0	525	0	525	0	530	0	530	0	525	0	525	0	520	0	525	0	525	0	525	0	535	0	525	0	525	0	525	0	525	0
17.9378	0	525	0	525	0	525	0	525	0	530	0	525	0	530	0	525	0	525	0	525	0	525	0	530	0	530	0	525	0	525	0	520	0	525	0	525	0	525	0	535	0	525	0	525	0	525	0	525	0
17.9479	0	525	0	525	0	525	0	525	0	530	0	525	0	530	0	525	0	525	0	525	0	525	0	530	0	530	0	525	0	525	0	520	0	525	0	525	0	525	0	535	0	525	0	525	0	525	0	525	0
17.9579	0	525	0	525	0	525	0	525	0	530	0	525	0	530	0	525	0	525	0	525	0	525	0	530	0	530	0	525	0	525	0	520	0	525	0	525	0	525	0	535	0	525	0	525	0	525	0	525	0
17.9679	0	525	0	525	0	525	0	525	0	530	0	525	0	530	0	525	0	525	0	525	0	525	0	530	0	530	0	525	0	525	0	520	0	525	0	525	0	525	0	535	0	525	0	525	0	525	0	525	0
17.9779	0	525	0	525	0	525	0	525	0	530	0	525	0	530	0	525	0	525	0	525	0	525	0	530	0	530	0	525	0	525	0	520	0	525	0	525	0	525	0	535	0	525	0	525	0	525	0	525	0
17.9879	0	525	0	525	0	525	0	525	0	530	0	525	0	530	0	525	0	525	0	525	0	525	0	530	0	530	0	525	0	525	0	520	0	525	0	525	0	525	0	535	0	525	0	525	0	525	0	525	0
17.9979	0	525	0	525	0	525	0	525	0	530	0	525	0	530	0	525	0	525	0	525	0	525	0	530	0	530	0	525	0	525	0	520	0	525	0	525	0	525	0	535	0	525	0	525	0	525	0	525	0
18.008	0	525	0	525	0	525	0	525	0	530	0	525	0	530	0	525	0	525	0	525	0	525	0	530	0	530	0	525	0	525	0	520	0	525	0	525	0	525	0	535	0	525	0	525	0	525	0	525	0
18.018	0	525	0	525	0	525	0	525	0	530	0	525	0	530	0	525	0	525	0	525	0	525	0	530	0	530	0	525	0	525	0	520	0	525	0	525	0	525	0	535	0	525	0	525	0	525	0	525	0
18.028	0	525	0	525	0	525	0	525	0	530	0	525	0	530	0	525	0	525	0	525	0	525	0	530	0	530	0	525	0	525	0	520	0	525	0	525	0	525	0	535	0	525	0	525	0	525	0	525	0
18.038	0	525	0	525	0	525	0	525	0	530	0	525	0	530	0	525	0	525	0	525	0	525	0	530	0	530	0	525	0	525	0	520	0	525	0	525	0	525	0	535	0	525	0	525	0	525	0	525	0
18.048	0	525	0	525	0	525	0	525	0	530	0	525	0	530	0	525	0	525	0	525	0	525	0	530	0	530	0	525	0	525	0	520	0	525	0	525	0	525	0	535	0	525	0	525	0	525	0	525	0
18.058	0	525	0	525	0	525	0	525	0	530	0	525	0	530	0	525	0	525	0	525	0	525	0	530	0	530	0	525	0	525	0	520	0	525	0	525	0	525	0	535	0	525	0	525	0	525	0	525	0
18.068	0	525	0	525	0	525	0	525	0	530	0	525	0	530	0	525	0	525	0	525	0	525	0	530	0	530	0	525	0	525	0	520	0	525	0	525	0	525	0	535	0	525	0	525	0	525	0	525	0
18.0781	0	525	0	525	0	525	0	525	0	530	0	525	0	530	0	525	0	525	0	525	0	525	0	530	0	530	0	525	0	525	0	520	0	525	0	525	0	525	0	535	0	525	0	525	0	525	0	525	0
18.0881	0	525	0	525	0	525	0	525	0	530	0	525	0	530	0	525	0	525	0	525	0	525	0	530	0	530	0	525	0	525	0	520	0	525	0	525	0	525	0	535	0	525	0	525	0	525	0	525	0
18.0981	0	525	0	525	0	525	0	525	0	530	0	525	0	530	0	525	0	525	0	525	0	525	0	530	0	530	0	525	0	525	0	520	0	525	0	525	0	525	0	535	0	525	0	525	0	525	0	525	0
18.1081	0	525	0	525	0	525	0	525	0	530	0	525	0	530	0	525	0	525	0	525	0	525	0	530	0	530	0	525	0	525	0	520	0	525	0	525	0	525	0	535	0	525	0	525	0	525	0	525	0
18.1181	0	525	0	525	0	525	0	525	0	530	0	525	0	530	0	525	0	525	0	525	0	525	0	530	0	530	0	525	0	525	0	520	0	525	0	525	0	525	0	535	0	525	0	525	0	525	0	525	0
18.1281	0	525	0	525	0	525	0	525	0	530	0	525	0	530	0	525	0	525	0	525	0	525	0	530	0	530	0	525	0	525	0	520	0	525	0	525	0	525	0	535	0	525	0	525	0	525	0	525	0
18.1382	0	525	0	525	0	525	0	525	0	530	0	525	0	530	0	525	0	525	0	525	0	525	0	530	0	530	0	525	0	525	0	520	0	525	0	525	0	525	0	535	0	525	0	525	0	525	0	525	0
18.1482	0	525	0	525	0	525	0	525	0	530	0	525	0	530	0	525	0	525	0	525	0	525	0	530	0	530	0	525	0	525	0	520	0	525	0	525	0	525	0	535	0	525	0	525	0	525	0	525	0
18.1582	0	525	0	525	0	525	0	525	0	530	0	525	0	530	0	525	0	525	0	525	0	525	0	530	0	530	0	525	0	525	0	520	0	525	0	525	0	525	0	535	0	525	0	525	0	525	0	525	0
18.1682	0	525	0	525	0	525	0	525	0	530	0	525	0	530	0	525	0	525	0	525	0	525	0	530	0	530	0	525	0	525	0	520	0	525	0	525	0	525	0	535	0	525	0	525	0	525	0	525	0
18.1782	0	525	0	525	0	525	0	525	0	530	0	525	0	530	0	525	0	525	0	525	0	525	0	530	0	530	0	525	0	525	0	520	0	525	0	525	0	525	0	535	0	525	0	525	0	525	0	525	0
18.1882	0	525	0	525	0	525	0	525	0	530	0	525	0	530	0	525	0	525	0	525	0	525	0	530	0	530	0	525	0	525	0	520	0	525	0	525	0	525	0	535	0	525	0	525	0	525	0	525	0
18.1983	0	525	0	525	0	525	0	525	0	530	0	525	0	530	0	525	0	525	0	525	0	525	0	530	0	530	0	525	0	525	0	520	0	525	0	525	0	525	0	535	0	525	0	525	0	525	0	525	0
18.2083	0	525	0	525	0	525	0	525	0	530	0	525	0	530	0	525	0	525	0	525	0	525	0	530	0	530	0	525	0	525	0	520	0	525	0	525	0	525	0	535	0	525	0	525	0	525	0	525	0
18.2183	0	525	0	525	0	525	0	525	0	530	0	525	0	530	0	525	0	525	0	525	0	525	0	530	0	530	0	525	0	525	0	520	0	525	0	525	0	525	0	535	0	525	0	525	0	525	0	525	0
18.2283	0	525	0	525	0	525	0	525	0	530	0	525	0	530	0	525	0	525	0	525	0	525	0	530	0	530	0	525	0	525	0	520	0	525	0	525	0	525	0	535	0	525	0	525	0	525	0	525	0
18.2383	0	525	0	525	0	525	0	525	0	530	0	525	0	530	0	525	0	525	0	525	0	525	0	530	0	530	0	525	0	525	0	520	0	525	0	525	0	525	0	535	0	525	0	525	0	525	0	525	0
18.2483	0	525	0	525	0	525	0	525	0	530	0	525	0	530	0	525	0	525	0	525	0	525	0	530	0	530	0	525	0	525	0	520	0	525	0	525	0	525	0	535	0	525	0	525	0	525	0	525	0
18.2583	0	525	0	525	0	525	0	525	0	530	0	525	0	530	0	525	0	525	0	525	0	525	0	530	0	530	0	525	0	525	0	520	0	525	0	525	0	525	0	535	0	525	0	525	0	525	0	525	0
18.2684	0	525	0	525	0	525	0	525	0	530	0	525	0	530	0	525	0	525	0	525	0	525	0	530	0	530	0	525	0	525	0	520	0	525	0	525	0	525	0	535	0	525	0	525	0	525	0	525	0
18.2784	0	525	0	525	0	525	0	525	0	530	0	525	0	530	0	525	0	525	0	525	0	525	0	530	0	530	0	525	0	525	0	520	0	525	0	525	0	525	0	535	0	525	0	525	0	525	0	525	0
18.2884	0	525	0	525	0	525	0	525	0	530	0	525	0	530	0	525	0	525	0	525	0	525	0	530	0	530	0	525	0	525	0	520	0	525	0	525	0	525	0	535	0	525	0	525	0	525	0	525	0
18.2984	0	525	0	525	0	525	0	525	0	530	0	525	0	530	0	525	0	525	0	525	0	525	0	530	0	530	0	525	0	525	0	520	0	525	0	525	0	525	0	535	0	525	0	525	0	525	0	525	0
18.3084	0	525	0	525	0	525	0	525	0	530	0	525	0	530	0	525	0	525	0	525	0	525	0	530	0	530	0	525	0	525	0	520	0	525	0	525	0	525	0	535	0	525	0	525	0	525	0	525	0
18.3184	0	525	0	525	0	525	0	525	0	530	0	525	0	530	0	525	0	525	0	525	0	525	0	530	0	530	0	525	0	525	0	520	0	525	0	525	0	525	0	535	0	525	0	525	0	525	0	525	0
18.3285	0	525	0	525	0	525	0	525	0	530	0	525	0	530	0	525	0	525	0	525	0	525	0	530	0	530	0	525	0	525	0	520	0	525	0	525	0	525	0	535	0	525	0	525	0	525	0	525	0
18.3385	0	525	0	525	0	525	0	525	0	530	0	525	0	530	0	525	0	525	0	525	0	525	0	530	0	530	0	525	0	525	0	520	0	525	0	525	0	525	0	535	0	525	0	525	0	525	0	525	0
18.3485	1.07	525	0.21	525	0.68	525	0.4	525	-0.82	530	0.52	525	-0.08	530	0.61	525	-0.21	525	0.78	525	0.66	525	-0.5	530	-0.26	530	0.56	525	0.28	525	-0.86	520	0.29	525	-0.12	525	0.94	525	2.13	535	0.42	525	0.65	525	-0.04	525	0.25	525	0.315
18.3585	0.91	525	-0.26	525	0.67	525	-0.09	525	-0.49	530	0	525	-0.13	530	0.21	525	0.96	525	0.18	525	0.35	525	-0.45	530	-1.02	530	0.26	525	0.33	525	-0.88	520	-0.1	525	-0.1	525	0.98	525	2.34	535	0.45	525	0.73	525	0.02	525	0.13	525	0.208333
18.3685	0.92	525	0.23	525	0.97	525	0.33	525	-0.27	530	-0.03	525	-0.57	530	-0.38	525	0.65	525	0.58	525	0.22	525	0.11	530	-0.95	530	-0.1	525	0.2	525	-0.88	520	-0.49	525	-0.16	525	1.24	525	2.26	533	0.08	525	0.72	525	0.35	525	-0.16	525	0.202917
18.3785	0.55	525	-0.77	525	0.61	525	-0.62	525	-0.93	530	0.33	525	-0.54	530	-0.19	525	-0.03	525	0.35	525	-0.05	525	0.04	530	-0.28	530	-0.03	525	0.32	525	-0.91	520	-0.26	525	-0.48	525	1.06	525	2.12	531	0.09	525	1.04	525	0.4	525	-0.94	525	0.0366667
18.3885	0.71	525	-0.85	525	0.96	525	-0.66	525	-0.73	530	0.05	525	-0.63	530	-0.1	525	0.47	525	0.37	525	-0.24	525	0.13	530	-0.96	530	-0.16	525	0.01	525	-0.9	520	-0.13	525	-0.56	525	1.03	524	2.33	529	-0.13	525	0.96	525	0.36	525	-1.03	525	0.0125
18.3986	0.53	525	-0.1	525	0.45	525	-0.07	525	-0.42	530	0.45	525	-0.4	530	0.19	525	0.34	525	0.49	525	0.05	525	-0.09	530	-0.93	530	-0.22	525	-0.27	525	-1.14	520	-0.26	525	-0.51	525	1.21	523	2.35	527	0.09	525	1	525	-0.02	525	-0.19	525	0.105417
18.4086	0.91	525	-0.55	525	0.56	525	0.8	525	-0.26	530	1.02	525	-0.16	530	0.05	525	0.1	525	0.36	525	-0.27	525	-0.33	530	-0.33	530	0.55	525	-0.32	525	-0.84	520	-0.17	525	-0.91	525	1.49	522	1.89	525	0.34	525	0.86	525	0.46	525	-0.61	525	0.193333
18.4186	0.74	525	-0.92	525	1.23	525	0.65	525	-1.15	530	1.29	525	-0.11	530	-0.05	525	0.69	525	-0.06	525	-0.09	525	-0.27	530	-1.15	530	0.87	525	-0.45	525	-1.07	520	0	525	-0.81	525	1.01	521	1.1	524	-0.26	525	0.72	525	-0.11	525	-0.44	525	0.0566667
18.4286	0.87	525	-0.61	525	0.1	525	0.52	525	-1.32	530	0.69	524	0	530	-0.02	525	0.46	525	0.54	525	-0.37	525	-0.14	530	-0.89	530	0.37	525	-0.46	525	-0.68	520	0.24	525	-0.9	525	1.06	520	0.61	523	-0.7	525	1.06	525	0.58	525	-0.46	525	0.0229167
18.4386	0.84	525	-0.12	525	0.8	525	0.93	525	-0.8	531	1.07	524	0.15	530	0.33	525	0.34	525	0.57	525	0.23	525	-0.25	530	-1.12	530	0.45	525	-0.56	525	-0.79	520	0.4	525	-0.67	525	0.72	519	-0.35	523	-0.54	525	0.95	525	0.19	525	-0.14	525	0.109583
18.4486	0.92	525	0.18	525	0.83	525	1.58	525	-0.55	531	1.33	524	-0.61	530	-0.01	525	0.51	525	0.75	525	-0.1	525	-0.24	530	-1.27	530	0.16	525	-0.38	525	-0.97	520	0.3	525	-0.58	525	0.12	519	-1.11	523	-0.3	525	0.86	525	-0.01	525	-0.11	525	0.0541667
18.4587	1.06	525	-0.13	525	0.68	525	0.95	525	0.53	531	0.85	523	-0.47	530	-0.19	525	0.42	525	1.11	525	0.43	525	-0.29	530	-1.09	531	0.16	525	0.37	525	-0.93	520	0.39	525	-0.77	525	-0.24	519	-1.85	523	-0.2	525	0.7	525	0.31	525	-0.26	525	0.0641667
18.4687	0.93	525	0.05	525	0.48	525	0.56	525	-0.04	531	1.31	523	-1.07	530	-0.46	525	0.32	525	0.61	525	-0.45	525	-0.36	530	-1.37	532	0.24	525	-0.31	525	-1.02	520	0.59	525	-0.4	525	-0.28	519	-2.28	524	-0.39	525	0.51	525	0.14	525	-0.38	525	-0.127917
18.4787	0.67	525	0.75	525	0.23	525	0.89	525	-0.47	531	0.88	523	-0.41	530	-0.35	525	0.07	525	0.63	525	-0.03	525	-0.25	530	-1.39	533	0.51	525	0.16	525	-1.07	520	0.36	525	-0.23	525	-0.37	519	-2.27	526	-0.43	525	0.54	525	0.15	525	-0.45	525	-0.0783333
18.4887	0.69	525	-0.46	525	0.63	525	0.55	525	-0.82	531	0.95	523	-0.64	530	-0.09	525	0.16	525	0.43	525	0.47	525	-0.51	530	-1.56	534	0.59	525	0.14	525	-0.94	521	0.26	525	-0.71	525	-0.32	519	-2.67	528	-0.38	525	0.46	525	0.44	525	-0.32	525	-0.152083
18.4987	0.82	525	-0.45	525	0.27	525	-0.01	525	-0.88	531	0.78	523	-0.07	530	-0.31	525	0.03	525	0.32	525	0.65	525	-0.38	530	-1.14	535	-0.04	525	-0.18	525	-0.87	521	0.45	525	-0.55	525	-0.77	519	-2.44	530	-0.44	525	0.69	525	0.4	525	-0.12	525	-0.176667
18.5087	0.94	525	-0.42	525	0.54	525	-0.48	525	-0.91	531	1.11	523	-0.6	530	-0.24	525	0.59	525	0.32	525	0.92	525	-0.2	530	-1.16	536	0.36	525	-0.25	525	-0.97	521	0.74	525	-0.7	525	-0.96	519	-2.18	532	-0.34	525	0.85	525	0.26	525	-0.05	525	-0.117917
18.5187	0.66	525	-0.15	525	0.89	525	-0.21	525	-0.4	531	0.43	523	-0.69	530	-0.04	525	-0.15	525	0.32	525	0.36	525	-0.01	530	-0.79	537	0.11	525	0.17	525	-0.75	521	0.47	525	-0.6	525	-1.03	519	-2.25	534	-0.33	525	0.67	525	0.23	525	-0.94	525	-0.167917
18.5288	1.24	525	0.01	525	0.59	525	-0.15	525	0.44	531	1	523	-0.33	530	0.07	525	-0.1	525	0.43	525	0.8	525	-0.61	530	-0.74	537	0.59	525	0.11	525	-0.84	521	0.63	525	-0.72	525	-1.22	519	-1.63	536	0.2	525	0.73	525	-0.18	525	-0.8	525	-0.02
18.5388	0.71	525	-0.44	525	0.14	525	1.06	525	0.48	531	0.33	523	-0.12	530	0.15	525	0.34	525	0.01	525	0.48	525	-0.33	530	-0.36	537	0.11	525	0.6	525	-0.6	521	0.63	525	-1.15	525	-1.14	520	-1.28	537	0.19	525	1.07	525	0.22	525	-0.25	525	0.0354167
18.5488	1.07	525	-0.13	525	0.3	525	0.44	525	0.17	531	0.63	523	0.08	530	-0.07	525	0.22	525	0.47	525	0.32	525	-0.48	530	-0.75	537	0.32	525	1.25	525	-0.69	521	0.62	525	-0.84	525	-1.61	521	-0.52	538	-0.3	525	1.11	525	0.42	525	0.03	525	0.0858333
18.5588	1.01	525	-0.37	525	0.42	525	0.45	525	0.25	531	0.62	523	-0.65	530	0.39	525	0.51	525	0.41	525	-0.16	525	-0.32	530	-0.81	537	0.49	525	1.41	525	-0.88	521	0.1	525	-0.57	525	-1.41	522	-0.44	538	-0.33	525	0.7	524	0.15	525	0.1	525	0.0445833
18.5688	0.85	524	0.02	525	0.39	525	0.68	525	0.42	531	0.21	523	-0.15	530	-0.57	525	0.96	525	0.35	525	-0.69	525	-0.3	530	-1.42	537	0.97	525	1.2	524	-0.73	521	0.06	525	-0.4	525	-1.41	523	-0.11	538	-0.41	525	0.48	524	0.32	525	-0.1	525	0.0258333
18.5788	1.12	524	0.32	525	0.28	525	0.81	525	0.63	531	-0.32	523	-0.02	530	-0.65	525	0.03	525	0.64	525	-0.66	525	-0.27	530	-0.36	537	0.56	525	0.98	523	-0.84	521	0.24	525	-0.4	525	-0.75	524	0.25	538	-0.36	525	0.81	524	0.31	525	-0.03	525	0.0966667
18.5889	1.2	524	0.01	525	0.6	525	0.07	525	0.59	531	0.14	523	-0.19	530	0.58	525	-0.3	525	1.01	525	0.02	525	-0.29	530	-0.04	537	0.35	525	0.98	523	-0.8	521	0.36	525	-0.56	525	-0.24	524	-0.03	538	-0.4	525	0.42	524	0.46	525	-0.29	525	0.152083
18.5989	0.34	523	0.1	525	0.84	525	0.09	525	-0.01	531	0.09	523	-0.04	530	0.03	525	0.34	525	-0.52	525	-0.25	525	-0.16	530	-0.52	537	0.59	525	0.64	523	-1.04	521	0.39	525	-0.45	525	-0.18	524	0.52	538	-0.16	525	0.23	524	0	525	0.61	525	0.0616667
18.6089	0.61	523	-0.45	525	0.72	525	-0.26	525	-0.95	531	0.21	523	0.58	530	-0.17	525	0.31	525	-0.04	525	-0.8	525	-0.04	530	-0.01	537	1.38	525	0.71	523	-0.81	521	0.25	525	-0.63	525	0.24	524	0.21	538	-0.68	525	0.55	524	0.4	525	0.42	525	0.0729167
18.6189	0.2	523	-0.14	525	0.18	525	0.16	525	-1	531	0.2	523	0.5	530	0.2	525	0.05	525	-0.26	525	-0.57	525	-0.26	530	0.18	537	0.77	525	0.61	523	-0.67	521	0.69	525	-0.56	525	0.5	524	0.16	538	-0.68	525	0.69	524	0.47	525	-0.36	525	0.0441667
18.6289	0.02	523	-0.1	525	0.5	525	0.52	525	-0.52	531	0.36	523	0.06	530	0.08	525	0.25	525	0.3	525	-0.17	525	-0.28	530	0.69	537	0.3	525	0.59	523	-0.47	521	0.46	525	-0.38	525	0.98	524	0.43	538	-0.87	525	0.95	524	0.19	525	0.09	525	0.165833
18.6389	0.3	523	0.18	525	0.11	525	0.53	525	-0.88	531	0.34	523	0.38	530	-0.51	525	0.65	525	0.94	525	-0.1	525	-0.47	530	0.13	537	0.16	525	0.4	523	-0.66	521	0.46	525	-0.54	525	0.79	524	0.77	538	-0.65	525	1.07	524	0.31	525	0.45	525	0.173333
18.6489	0.42	523	-0.24	525	0.16	525	0.25	525	-0.91	531	0.9	523	-0.31	530	0	525	0.24	525	0.36	525	-0.18	525	-0.5	530	-0.11	537	0.19	525	0.3	523	-0.73	521	0.11	525	-0.51	525	0.83	524	0.93	538	-0.62	525	1	524	0.38	525	0.5	525	0.1025
18.659	-0.13	523	0.09	525	0.34	525	0.2	525	-0.7	531	0.02	523	0.3	530	-0.28	525	1.28	525	0.47	525	-0.58	525	-0.52	530	0.03	537	0.49	525	1.03	523	-0.66	521	0.23	525	-0.39	525	1.32	524	1.47	538	-0.84	525	1.15	524	0.53	525	-0.09	525	0.198333
18.669	0.15	523	-0.21	525	0.58	525	-0.26	525	-0.06	531	-0.49	523	-0.85	530	-0.2	525	0.53	525	0.33	525	-0.36	525	-0.25	530	0.56	537	0.45	525	0.67	523	-0.86	521	0.44	525	-0.03	525	0.95	524	0.94	538	-1.05	525	1	524	0.26	525	0.42	525	0.110833
18.679	-0.03	523	-0.37	525	0.66	525	0.58	525	0.29	531	-0.41	523	-0.93	530	-0.23	525	0.69	525	0.41	525	0.22	525	-0.13	530	0.36	537	0.84	525	0.4	523	-0.86	521	0.22	525	-0.22	525	1.04	524	0.89	538	-1.11	525	1.07	523	0.15	525	-0.25	525	0.136667
18.689	0.23	523	-0.36	525	0.81	525	0.03	525	-0.17	531	0	523	-0.57	530	-0.86	525	0.4	525	0.36	525	0.64	525	-0.64	530	0.57	537	0.22	525	0.14	523	-1.01	521	0.7	525	-0.18	525	1.12	524	1.38	538	-1.49	526	1.12	522	0.3	525	-0.72	525	0.0841667
18.699	0.22	523	-0.27	525	0.2	525	-0.01	525	-0.23	531	0.16	523	-0.46	530	-0.23	525	-0.08	525	0.59	525	0.03	525	-0.38	530	0.98	537	0.53	525	-0.08	523	-0.85	521	0.42	525	-0.35	525	0.98	523	1.59	538	-1.61	527	0.54	521	0.16	525	-0.99	525	0.0358333
18.709	0.34	523	-0.16	525	0.14	525	-0.39	525	-0.12	531	0.51	523	0.2	530	0.18	525	0.25	525	0.29	525	-0.2	525	-0.28	530	0.65	537	0.93	525	0.18	523	-0.86	521	0.79	525	-0.12	525	1.06	523	1.84	537	-1.34	528	0.24	521	0.15	525	-0.49	525	0.157917
18.7191	0.18	523	-0.42	525	0.65	525	-0.8	525	-0.01	531	0.27	523	-0.6	530	0.44	525	0.97	525	0.17	525	-0.36	525	-0.41	530	0.84	537	-0.23	525	-0.13	523	-0.93	521	0.45	525	-0.35	525	1.31	523	1.95	536	-0.72	529	-0.04	521	0.33	525	-0.01	525	0.10625
18.7291	-0.42	523	-0.34	525	0.71	525	-0.48	525	-0.25	531	-0.24	523	0.3	530	0.04	525	0.32	525	0.96	525	-0.34	525	-0.3	530	1.22	537	0.57	525	-0.18	523	-0.83	521	0.6	525	0.12	525	1	522	2.13	535	-0.56	529	-0.21	521	0.22	525	0.49	525	0.18875
18.7391	-0.35	523	-0.2	525	0.67	525	-0.75	525	-0.16	531	0.04	523	0.14	530	-0.17	525	0.51	525	0.52	525	-0.21	525	-0.04	530	1.68	537	0.62	525	0.34	523	-0.76	521	0.34	525	-0.2	525	1.39	521	1.82	533	-0.71	529	-0.3	521	0.2	525	0.3	525	0.196667
18.7491	-0.45	523	-0.21	525	0.24	525	-1.4	525	-0.65	531	0.6	523	-0.09	530	-0.22	525	0.18	525	0.69	525	-0.52	525	-0.41	530	0.72	536	0.44	525	0.31	523	-0.78	521	0.53	525	0.05	525	1.15	520	1.99	532	-0.33	529	-0.21	521	0.51	525	-0.3	525	0.0766667
18.7591	-0.04	523	-0.23	525	0.7	525	-1.46	525	0.19	531	0.25	523	0.1	530	-0.07	525	-0.11	525	0.05	525	0.25	525	-0.22	530	0.91	536	0.2	525	-0.24	523	-0.98	521	0.73	525	-0.49	525	0.9	519	2.18	531	-0.01	529	-0.26	521	0.43	525	-0.13	525	0.110417
18.7691	0.08	523	0.02	525	0.22	525	-1.12	526	-0.34	531	0.52	523	0.35	530	0.49	525	-0.02	525	-0.05	525	-0.08	525	-0.28	530	0.98	536	-0.01	525	-0.16	523	-0.67	521	0.58	525	-0.04	525	0.85	519	2.07	529	0.34	529	-0.32	521	0.5	525	-0.94	525	0.12375
18.7792	0.04	523	0.1	525	0.02	525	-0.34	527	-1.13	531	0.63	523	-0.26	530	0.33	525	-0.15	525	0.7	525	-0.45	525	0.08	530	0.88	536	0.7	525	-0.04	523	-0.8	521	0.3	525	-0.41	525	0.61	519	1.38	527	0.21	529	-0.63	521	0.49	525	-0.67	525	0.06625
18.7892	0.05	523	-0.06	525	0.43	525	0.46	527	-0.58	531	0.35	523	-0.15	530	-0.01	525	0.99	525	0.86	525	-0.01	525	-0.15	530	0.73	536	0.3	525	-0.49	523	-0.6	521	0.56	525	0.1	525	0.4	519	1	526	0.05	529	-0.59	521	0.14	525	-0.75	525	0.12625
18.7992	0.43	523	-0.43	525	0.4	525	0.55	527	-0.9	531	0.6	523	-0.26	530	-0.24	525	0.65	525	0.62	525	-0.07	525	-0.47	530	1.07	536	-0.04	525	-0.51	523	-0.66	521	0.88	525	0.03	525	-0.43	519	0.09	526	-0.21	529	-0.29	521	0.27	525	-0.88	525	0.00833333
18.8092	0.17	523	-0.15	525	0.65	525	0	527	-1.18	531	0.22	523	-0.36	530	0.52	525	0.65	525	0.78	525	-0.3	525	0.16	530	1.23	536	0.19	525	-0.12	523	-0.77	521	0.32	525	-0.55	525	-1.05	519	-0.41	526	-0.07	529	-0.28	521	0.48	525	-0.43	525	-0.0125
18.8192	-0.23	523	-0.45	525	0.76	525	0.63	527	-0.63	531	1.03	523	-1.02	530	0.09	525	0.55	525	0.29	525	-0.23	525	-0.15	530	0.81	535	0.3	525	-0.19	523	-0.87	521	0.57	525	-0.57	525	-0.75	519	-0.55	526	0.22	529	-0.04	521	0.35	525	-1.08	525	-0.0483333
18.8292	-0.06	523	-0.4	525	0.56	525	0.43	527	-0.26	531	0.35	523	-0.94	530	-0.17	525	0.61	525	0.2	525	-0.31	525	-0.02	530	0.79	535	-0.02	525	0.12	523	-1.14	521	0.29	525	-0.66	525	-0.68	519	-0.44	526	0.18	529	-0.14	521	0.63	525	-0.27	525	-0.05625
18.8392	-0.13	523	-0.36	525	0.37	525	0.97	527	-1.23	531	0.47	523	0.1	530	-0.18	525	0.07	525	0.47	525	-0.99	525	-0.23	530	0.76	535	0.07	525	-0.08	523	-0.9	521	0.92	525	-0.81	525	-0.42	519	-1.03	526	0.32	529	-0.22	521	0.29	525	-0.04	525	-0.0754167
18.8493	-0.06	523	-0.26	525	0.61	525	1.05	527	-0.65	531	0.89	523	-0.2	530	0.58	525	0.08	525	0.54	525	-0.88	525	-0.08	530	0.68	535	-0.19	525	0.01	523	-1.03	521	0.25	525	-0.62	525	-0.49	519	-1.06	526	0.04	529	-0.43	521	0.46	525	-0.18	525	-0.0391667
18.8593	-0.21	523	-0.36	525	0.62	525	0.47	527	-0.37	531	0.57	523	0.04	530	0.44	525	0.27	525	0.84	525	-0.72	525	-0.25	530	-0.15	535	-0.09	525	0.03	523	-1.12	521	0.33	525	-0.57	525	-0.64	519	-1.58	527	0.45	529	-0.47	521	0.14	525	-0.63	525	-0.123333
18.8693	0.2	523	-0.45	525	0.72	525	0.39	527	0.01	531	0.5	523	-0.06	530	-0.37	525	0.55	525	1.12	525	-0.49	525	-0.35	530	0.09	535	-0.33	525	-0.26	523	-0.72	522	0.35	525	-1.01	525	-0.75	519	-1.93	528	0.45	529	-0.08	521	0.49	525	-0.19	525	-0.0883333
18.8793	-0.26	523	-0.54	525	0.75	525	1.08	527	-0.28	531	0.91	523	0.11	530	-0.48	525	0.78	525	0.3	525	-0.39	525	-0.18	530	0.31	535	-0.19	525	-0.43	523	-0.93	522	0.27	525	-0.63	525	-0.87	519	-1.61	529	0.34	529	-0.02	521	0.42	525	-0.26	525	-0.075
18.8893	-0.13	523	0.01	525	0.63	525	0.34	527	-1.02	531	0.42	523	0.05	530	-0.25	525	0.59	525	0.45	525	-0.52	525	-0.33	530	0.14	535	-0.31	525	-0.52	523	-0.72	522	0.81	525	-0.99	525	-0.77	519	-1.18	530	0.02	529	-0.52	521	0.33	525	-0.68	525	-0.172917
18.8993	-0.28	523	-0.09	525	0.76	525	0.5	527	-0.62	531	0.68	523	0.47	530	-0.19	525	0.04	525	0.76	525	-0.82	525	-0.49	530	0.56	535	-0.72	525	-0.98	523	-0.81	522	0.73	525	-0.97	525	-0.86	519	-1.24	531	0.23	529	-0.58	521	0.45	525	-0.77	525	-0.176667
18.9094	-0.04	523	-0.08	525	0.35	525	1.13	527	-0.26	531	-0.1	523	0.34	530	-0.63	525	0.51	525	1.48	525	-0.94	525	-0.69	530	0.58	535	-0.03	525	-0.46	523	-0.89	522	1.3	525	-1.11	525	-1.13	519	-0.91	532	0.29	529	-0.43	521	0.31	525	-0.86	525	-0.0945833
18.9194	-0.47	523	-0.06	525	0.79	525	1.24	527	-1.06	531	-0.16	523	0.65	530	-0.7	525	0.68	525	1.25	525	-0.64	525	-0.34	530	-0.14	535	-0.7	525	-0.18	523	-0.72	522	1.24	525	-0.93	525	-1.66	519	-0.9	532	0.07	529	-0.68	521	0.26	525	-0.85	525	-0.167083
18.9294	-0.24	523	-0.11	525	0.78	525	0.5	526	-0.44	531	0.29	523	0.27	530	-0.59	525	0.58	525	0.87	524	0.53	525	-0.68	530	-0.11	535	-0.46	525	-0.56	523	-0.51	522	0.68	524	-0.94	525	-1.47	520	-1.03	532	0.08	529	-0.75	521	0.37	525	-0.64	525	-0.149167
18.9394	-0.04	523	-0.25	525	0.56	525	0.07	526	-0.43	531	0.44	523	-0.33	530	0.04	525	0.05	525	1.09	524	0.12	525	-0.51	530	0.01	535	0.07	525	-0.02	523	-0.58	522	1.3	524	-0.38	525	-0.82	521	-0.88	532	-0.09	529	-1	521	0.33	525	-0.52	525	-0.07375
18.9494	-0.05	523	0.23	525	0.27	525	0.96	526	-0.22	531	0.86	523	0.71	530	0.44	525	1.07	525	1.01	524	0.63	525	-0.19	530	-0.29	535	0.12	525	-0.13	523	-0.6	522	1.09	524	-0.41	525	-0.99	521	-0.72	532	0.02	529	-0.94	521	0.26	525	0.13	525	0.135833
18.9594	0.14	523	0.03	525	0.47	525	0.39	526	-0.37	531	0.29	523	0.57	530	-0.31	525	0.63	525	0.7	523	0.54	525	0.13	530	-0.06	535	0.56	525	-0.25	523	-0.74	522	1.02	523	-0.08	525	-0.7	521	-0.44	532	-0.07	529	-0.8	521	0.62	525	0.21	525	0.103333
18.9694	-0.13	523	-0.07	525	0.44	525	0.88	526	0.06	531	0.38	523	-0.91	530	-0.04	525	0.81	525	0.36	523	0.72	525	-0.21	530	-0.02	535	0.35	525	0.54	523	-0.62	522	0.46	522	-0.47	525	-0.9	521	-0.36	532	0.1	529	-0.53	521	0.41	525	-0.45	525	0.0333333
18.9795	0.23	523	-0.2	525	0.64	525	0.69	526	-0.24	531	-0.16	523	-0.54	530	-0.66	525	0.64	525	0.61	523	0.29	525	-0.11	530	-0.3	535	0.27	525	0.48	523	-0.77	522	0.29	522	0.15	525	-0.81	521	0.09	532	0.19	529	-0.36	521	0.04	525	-0.06	525	0.0166667
18.9895	-0.07	523	0.25	525	0.76	525	0.82	526	0.25	531	0.11	523	0.01	530	-0.26	525	0.5	525	0.12	523	0	525	-0.3	530	-0.21	535	0.24	525	1.04	523	-0.77	522	-0.21	522	-0.45	525	-1.15	521	0.09	532	0.58	529	-0.42	521	0.52	525	-0.34	525	0.04625
18.9995	0.05	523	-0.34	525	0.75	525	0.62	526	0.79	531	0.18	523	0.5	530	-0.3	525	0.65	525	-0.39	523	0.81	525	0.06	530	-0.31	535	0.51	525	0.9	523	-0.73	522	-0.21	522	-0.09	525	-0.88	521	0.1	532	0.23	529	-0.16	521	0.28	525	-0.78	525	0.0933333
19.0095	0.01	523	-0.22	525	0.3	525	0.07	526	1.96	531	0.49	523	0	530	-0.46	525	0.24	525	-0.15	523	1.4	525	-0.35	530	-1.21	535	0.43	525	0.18	523	-0.75	522	-0.11	522	-0.27	525	-0.64	521	0.13	532	0.28	529	-0.33	521	0.64	525	-0.27	525	0.0570833
19.0195	-0.25	523	-0.63	525	0.29	525	0.1	526	1.78	531	0.65	523	-0.04	530	-0.37	525	0.27	525	0.05	523	0.94	525	-0.58	530	-1.19	535	0.39	525	-0.25	523	-0.57	522	-0.08	522	-0.37	525	-0.71	521	-0.26	532	0.78	529	-0.25	521	0.45	525	-0.69	525	-0.0225
19.0295	-0.39	523	-0.46	525	0.57	525	0.97	526	1.02	530	-0.06	523	0.58	530	0.26	525	0.36	525	-0.28	523	0.63	525	-0.15	530	-0.52	536	-0.03	525	-0.22	523	-0.98	522	-0.53	522	-0.79	525	-0.91	521	0.12	532	0.76	529	-0.54	521	0.43	525	-0.62	525	-0.0325
19.0396	-0.12	523	-0.17	525	0.48	525	0.78	526	0.02	529	0.27	523	0	530	-0.49	525	0.47	525	0.25	523	0.41	525	0.08	530	-0.89	536	-0.15	525	-0.03	523	-0.65	522	-0.73	522	-0.32	525	-0.64	521	-0.05	532	0.94	529	-0.85	521	0.65	525	-0.4	525	-0.0475
[truncated: 929 more rows]
[truncated: 3 more columns]

## Sheet: 1 H
	0 → -5	-5 → 5	5 → 0
[truncated: 24 more rows]

## Sheet: 1 I
dark	laser	laser + cal.
[truncated: 17 more rows]

[truncated: 116 more sheets: 2 A, 2 B, 2 C, 2 D, 2 E, 2 F-H, 2 I, 2 J, 2 K, 2 L, 3 A, 3 B, 3 C, 3 D, 3 E, 3 F, 3 G, 3 H, 3 I, 3 J …]
